# Supplementary material for: Long non-coding RNA-mediated competing endogenous RNA regulatory network during flower development and color formation in Melastoma candidum
Source: Front Plant Sci. 2023 Jul 27;14:1215044. doi: 10.3389/fpls.2023.1215044 (PMC10415103; doi:10.3389/fpls.2023.1215044)
Supplement: Supplementary file 2 [file Table_1.xlsx]

## Sheet: Table S1
Primers of qRT-PCR and clone of lncRNAs, miRNAs, and target genes
Primer ID	5'-->3'	length
PHT3qF	ACATCGTGGTGACGAAGGTC	73bp
PHT3qR	AGGAGGGAGGAAGCTCGATT
HSTqF	CGACGACCAGGAGACCAAAA	86bp
HSTqR	CATTGCCGAAGTAGCCTGGA
AHT1qF	TTCGGAAACCTCGTCCTGTG	119bp
AHT1qR	TAGTCCCCGTTGAGGTTGGA
UGT88B1qF	CATCCGACTCAACAACCCCA	201bp
UGT88B1qR	GTTCGATGGAGGCAGGGTAG
ASP2qF	GAACAGGGTCACGACTGTCC	198bp
ASP2qR	GTTTCCCCAGGTAGGCTGA
UGT88F3qF	CGGCTTTCTGGACATGGT	87bp
UGT88F3qR	TCACTTCCTTCCCTCCGTC
L23qF	AAGGATGCCGTGAAGAAGATGT	110bp
L23qR	GCATCGTAGTCAGGAGTCAACC
lnc-MSTRG.10215.1qF	GACATCGACAGCCTAAAATCAGA	137bp
lnc-MSTRG.10215.1qR	CCATGGAAAAGGTCTTCTTCTCT
lnc-MSTRG.11402.2qF	GGCAGATTTAATTATGGGTACAGA	117bp
lnc-MSTRG.11402.2qR	CACTGGTCGATAGTAATAGCCAATC
lnc-MSTRG.11415.1qF	GCAGCTATCACCTGCTCATC	138bp
lnc-MSTRG.11415.1qR	AAGATACAGACATCCCTGGTCC
lnc-MSTRG.17619.1qF	GCCAGTGTTCTTCTTCGGC	137bp
lnc-MSTRG.17619.1qR	ACCTCTCCGCCTGTCTCTTC
lnc-MSTRG.23785.1qF	ACGACACAACACCCAAACC	104bp
lnc-MSTRG.23785.1qR	GCCCATGGATCAGGTCCT
lnc-MSTRG.24133.1qF	GGGTCAGTTTGCCTCTTATGAT	217bp
lnc-MSTRG.24133.1qR	TGAGATCCTGTCTCATCGCAT
lnc-MSTRG.24719.1qF	GTGTATATTTTGGGGATGCTTTG	149bp
lnc-MSTRG.24719.1qR	GGGAAGGCATTAATCAACGA
lnc-MSTRG.28008.2qF	CGAGCTGAGACCCAAAAGG	83bp
lnc-MSTRG.28008.2qR	ACACGTCCTCGCATCATTG
lnc-MSTRG.29477.1qF	GCAACAAACGTTACGCCG	153bp
lnc-MSTRG.29477.1qR	CTACCTTTTACATCCTCGACTTCG
lnc-MSTRG.29558.1qF	GAGCGGTGTGGTTGCCT	148bp
lnc-MSTRG.29558.1qR	TTCTGCCTAAACCGTCAAATG
lnc-MSTRG.29930.1qF	GAAGCAAGCCCGAACAAAC	135bp
lnc-MSTRG.29930.1qR	CTCTCTCTCTCTGTGTACCAAATGTT
lnc-MSTRG.34245.1qF	GTAGCCCAACTCATAGAGAGTTCTGT	129bp
lnc-MSTRG.34245.1qR	TGAGCTTAGCACAACACGATATG
lnc-MSTRG.24133.1cF	GGAGAGGACAGGGTACCCGGGGACTTCACAGCCGCCATACT	2493bp
lnc-MSTRG.24133.1cR	TGCCTGCAGGTCGACTCTAGACTCACAGACGTTCCAAGAGGT
lnc-MSTRG.28008.2cF	GGAGAGGACAGGGTACCCGGGTAATGGTAATCCATCACTCGAGC	699bp
lnc-MSTRG.28008.2cR	TGCCTGCAGGTCGACTCTAGACTTGCATTGATGAGCTTATTGG
lnc-MSTRG.17619.1cF	GGAGAGGACAGGGTACCCGGGCAAGACAACGGGAGTGATCA	416bp
lnc-MSTRG.17619.1cR	TGCCTGCAGGTCGACTCTAGAGTGGATCCTGTCCACAAGAAG
lnc-MSTRG.10215.1cF	GGAGAGGACAGGGTACCCGGGCTGAAGCGCAAAGACATCG	554bp
lnc-MSTRG.10215.1cR	TGCCTGCAGGTCGACTCTAGAGATGATACAATCCCCATGTCG
lnc-MSTRG.24719.1cF	GGAGAGGACAGGGTACCCGGGTAGATGAATGGGAAGAACTGAAGG	1664bp
lnc-MSTRG.24719.1cR	TGCCTGCAGGTCGACTCTAGATCTCGCAATTATCAACATTTAATTACA
lnc-MSTRG.11415.1cF	GGAGAGGACAGGGTACCCGGGTCAAACCCACCTCCTGTCC	476bp
lnc-MSTRG.11415.1cR	TGCCTGCAGGTCGACTCTAGATCCGTTCTGAACCAACTCGT
lnc-MSTRG.23785.1cF	GGAGAGGACAGGGTACCCGGGACCTTGATCTCCACATAACCTCAG	600bp
lnc-MSTRG.23785.1cR	TGCCTGCAGGTCGACTCTAGACGACAAGGTAGTCGCAACTG
McPHT3cF	GATACACCAAATCGACTCTAGAATGAAGGTAAAGATCGAGTCC	1320bp
McPHT3cR	GCCCTTGCTCACCATGGTACCTCAGAGTACGTAGCAATTCTGCA
McUGT88F3cF	GATACACCAAATCGACTCTAGAATGTCGTCCTCCTCCGAG	1203bp
McUGT88F3cR	GCCCTTGCTCACCATGGTACCTTAAATCTTCCACAAATCAACAAGC
McHSTcF	GATACACCAAATCGACTCTAGAATGGTTGCCGGGATTGA	1329bp
McHSTcR	GCCCTTGCTCACCATGGTACCCTATATTTGATACAGCAGTTTCTCAAAC
McAHT1cR	GATACACCAAATCGACTCTAGAATGAAGGTTAAGATCGAGTCCTCC	1323bp
McAHT1cR	GCCCTTGCTCACCATGGTACCTCAGAGTACGTAGCAGTTCTGCAT
McUGT88B1cF	GATACACCAAATCGACTCTAGAATGAAGGAAGCCGTCGTC	1398bp
McUGT88B1cR	GCCCTTGCTCACCATGGTACCTTATTGTTTCCAGGAGTCGACG
McASP2cF	GATACACCAAATCGACTCTAGAATGGATTCGGTCTTCAGTCAC	1218bp
McASP2cR	GCCCTTGCTCACCATGGTACCTTAGGAGGCTTTCGTGACAGC
McCYP98A2cF	GATACACCAAATCGACTCTAGAATGGCTATCCCGGTTCTTTTAC	1533bp
McCYP98A2cR	GCCCTTGCTCACCATGGTACCTTACAGGTCCACCGCGAT
miR3704R1	TTTCCAACTCCACCACGACTTAGAGGTAACCTCTCGCGAGG	342bp
miR3704F2	GTCGTGGTGGAGTTGGAAAGACCATGCGTGCTAGCACTC
miR8131-3pR1	CAGTACAGCCAAGCTGAGTTAGAGGTAACCTCTCGCGAGG	341bp
miR8131-3pF2	CTCAGCTTGGCTGTACTGGACCATGCGTGCTAGCACTC
miR480R1	TGGTTCAAAGTCAAGGATTTAGAGGTAACCTCTCGCGAGG	341bp
miR480F2	ATCCTTGACTTTGAACCAGACCATGCGTGCTAGCACTC
miR1220R1	ATCTTCCTCATCACCCGATTAGAGGTAACCTCTCGCGAGG	341bp
miR1220F2	TCGGGTGATGAGGAAGATGACCATGCGTGCTAGCACTC
miR7494R1	TTCTCTTCGCCTTCTCCCTTAGAGGTAACCTCTCGCGAGG	341bp
miR7494F2	GGGAGAAGGCGAAGAGAAGACCATGCGTGCTAGCACTC
miRF1	GGAGAGGACAGGGTACCCGGGCCTGAAGTACATATCCTCCTTCCTC
miRR2	TGCCTGCAGGTCGACTCTAGATAGTTATTTCCGGCATCTCCTC

## Sheet: Table S2
Differentially expressed mRNAs in McII vs McI
LncRNAid	McaI_mean	McaII_mean	log2(FC)	PValue	FDR	significant
lnc-MSTRG.122.1	0.223333	207.467	9.85947	3.96707e-45	1.41942e-41	Up
lnc-MSTRG.19223.2	0.06	133.527	11.1199	2.21487e-31	3.96241e-28	Up
lnc-MSTRG.10246.1	15.7067	0.313333	-5.64753	7.86722e-23	9.38298e-20	Down
lnc-MSTRG.32062.1	3345	11.8533	-8.14057	1.60351e-22	1.43434e-19	Down
lnc-MSTRG.21465.1	0.796667	55.8167	6.13058	3.30648e-20	2.36612e-17	Up
lnc-MSTRG.16408.1	316.287	1.32667	-7.89728	6.93999e-19	4.13855e-16	Down
lnc-MSTRG.21529.2	18.7567	0.001	-14.1951	2.00222e-18	1.02342e-15	Down
lnc-MSTRG.4481.1	301.703	0.001	-18.2028	1.13575e-16	5.07964e-14	Down
lnc-MSTRG.4086.1	16.2233	0.45	-5.172	2.06554e-15	8.21166e-13	Down
lnc-MSTRG.19838.1	32029.1	508.437	-5.97717	6.17476e-15	2.20933e-12	Down
lnc-MSTRG.4891.1	12.57	0.001	-13.6177	3.98741e-14	1.29699e-11	Down
lnc-MSTRG.4660.2	5.02667	0.001	-12.2954	1.77227e-13	5.28432e-11	Down
lnc-MSTRG.298.1	0.0433333	35.3833	9.67338	3.37099e-13	9.27801e-11	Up
lnc-MSTRG.21384.1	0.02	18.4533	9.84967	4.38713e-13	1.12123e-10	Up
lnc-MSTRG.9353.2	0.0766667	15.35	7.64542	5.55011e-13	1.24988e-10	Up
lnc-MSTRG.34191.1	230.583	2.97667	-6.27545	5.5892e-13	1.24988e-10	Down
lnc-MSTRG.34172.1	12.63	0.001	-13.6246	1.58605e-12	3.33816e-10	Down
lnc-MSTRG.28125.1	1033.56	44.4833	-4.53822	2.02905e-12	4.0333e-10	Down
lnc-MSTRG.23332.1	9.9	0.776667	-3.67206	2.54766e-12	4.79764e-10	Down
lnc-MSTRG.31346.1	0.09	13.7433	7.25459	1.26027e-11	2.25462e-09	Up
lnc-MSTRG.20337.1	0.05	4.82	6.59096	1.59965e-11	2.7255e-09	Up
lnc-MSTRG.8085.1	0.756667	15.2833	4.33616	1.91844e-11	3.12007e-09	Up
lnc-MSTRG.34400.1	229.407	9.96	-4.52562	2.37579e-11	3.69591e-09	Down
lnc-MSTRG.1947.1	14.02	0.233333	-5.90895	3.40618e-11	5.07804e-09	Down
lnc-MSTRG.29342.2	0.001	3.79	11.888	5.52206e-11	7.90317e-09	Up
lnc-MSTRG.10308.1	0.08	3.13	5.29002	7.33437e-11	1.00932e-08	Up
lnc-MSTRG.34597.1	36.1	1.17333	-4.94331	1.02474e-10	1.35798e-08	Down
lnc-MSTRG.646.3	2.50333	0.001	-11.2896	1.69469e-10	2.16557e-08	Down
lnc-MSTRG.29274.1	0.203333	4.71333	4.53483	2.53762e-10	3.1309e-08	Up
lnc-MSTRG.25923.3	0.06	2.96667	5.62774	2.64695e-10	3.15693e-08	Up
lnc-MSTRG.16033.1	8.72667	0.566667	-3.94486	3.08983e-10	3.56626e-08	Down
lnc-MSTRG.6381.2	1.63667	20.8367	3.67029	3.28463e-10	3.67263e-08	Up
lnc-MSTRG.33966.1	0.0366667	7.43	7.66275	3.67686e-10	3.98661e-08	Up
lnc-MSTRG.11965.1	38.9467	5.6	-2.798	7.03098e-10	7.39907e-08	Down
lnc-MSTRG.28391.2	3.36333	0.5	-2.74989	1.73233e-09	1.77094e-07	Down
lnc-MSTRG.16015.2	0.001	5.17	12.3359	2.59713e-09	2.58126e-07	Up
lnc-MSTRG.33031.2	0.001	2.91333	11.5085	2.84044e-09	2.7043e-07	Up
lnc-MSTRG.33473.1	0.001	5	12.2877	2.87209e-09	2.7043e-07	Up
lnc-MSTRG.14409.1	1.83667	0.07	-4.71359	3.97844e-09	3.64996e-07	Down
lnc-MSTRG.27585.3	6.22667	33.43	2.42461	4.14433e-09	3.7071e-07	Up
lnc-MSTRG.26843.1	28.0833	3.75667	-2.90219	7.26993e-09	6.34435e-07	Down
lnc-MSTRG.5908.1	2.33667	12.7633	2.44948	1.4752e-08	1.25673e-06	Up
lnc-MSTRG.13612.3	0.07	2.33	5.05683	1.6651e-08	1.38551e-06	Up
lnc-MSTRG.939.1	1.68	0.001	-10.7142	1.81164e-08	1.47319e-06	Down
lnc-MSTRG.7828.1	4.68	0.81	-2.53051	3.04187e-08	2.41862e-06	Down
lnc-MSTRG.13712.1	5.78333	0.276667	-4.38568	3.36358e-08	2.61628e-06	Down
lnc-MSTRG.24275.2	0.001	0.966667	9.91687	3.44743e-08	2.62445e-06	Up
lnc-MSTRG.34041.1	9.70333	0.503333	-4.26889	3.60853e-08	2.68986e-06	Down
lnc-MSTRG.5659.1	4	0.31	-3.68966	4.07491e-08	2.97552e-06	Down
lnc-MSTRG.15502.1	4.27667	0.0566667	-6.23784	6.14477e-08	4.3972e-06	Down
lnc-MSTRG.3199.1	0.87	0.0166667	-5.70598	6.30016e-08	4.42e-06	Down
lnc-MSTRG.6381.4	5.85333	38.9933	2.7359	6.56778e-08	4.51914e-06	Up
lnc-MSTRG.8740.1	0.0433333	11.96	8.10852	7.26076e-08	4.9017e-06	Up
lnc-MSTRG.34240.1	11.7033	3.48333	-1.74838	1.09224e-07	7.23712e-06	Down
lnc-MSTRG.14704.1	0.03	2.33	6.27922	1.13622e-07	7.39163e-06	Up
lnc-MSTRG.17348.1	34.34	3.51667	-3.28761	1.42155e-07	8.94682e-06	Down
lnc-MSTRG.21987.1	4.1	0.223333	-4.19835	1.42529e-07	8.94682e-06	Down
lnc-MSTRG.11163.2	0.173333	8.66333	5.6433	1.58676e-07	9.76373e-06	Up
lnc-MSTRG.12431.1	1.56	0.001	-10.6073	1.61001e-07	9.76373e-06	Down
lnc-MSTRG.16485.1	0.001	1.68667	10.72	1.72928e-07	1.03123e-05	Up
lnc-MSTRG.14644.2	0.716667	7.74333	3.43358	2.20776e-07	1.29498e-05	Up
lnc-MSTRG.17897.1	0.0366667	1.65667	5.49767	2.40253e-07	1.38649e-05	Up
lnc-MSTRG.10916.2	0.27	7.77333	4.8475	2.73555e-07	1.55362e-05	Up
lnc-MSTRG.28061.2	0.0666667	3.18667	5.57894	3.17022e-07	1.77235e-05	Up
lnc-MSTRG.8302.1	0.83	8.22	3.30796	3.47576e-07	1.89353e-05	Up
lnc-MSTRG.22082.2	6.43	0.8	-3.00675	3.49282e-07	1.89353e-05	Down
lnc-MSTRG.13550.1	2495.99	398.543	-2.6468	4.14959e-07	2.216e-05	Down
lnc-MSTRG.8360.2	1.27333	0.001	-10.3144	5.36545e-07	2.82317e-05	Down
lnc-MSTRG.25180.1	1.17333	0.21	-2.48215	6.12383e-07	3.17552e-05	Down
lnc-MSTRG.13961.1	0.443333	15.2433	5.10364	6.24992e-07	3.1946e-05	Up
lnc-MSTRG.18501.1	0.0166667	2.40667	7.17393	6.63661e-07	3.34448e-05	Up
lnc-MSTRG.20310.1	0.001	0.88	9.78136	7.18848e-07	3.57227e-05	Up
lnc-MSTRG.30567.1	1.33333	0.001	-10.3808	7.89728e-07	3.87075e-05	Down
lnc-MSTRG.18501.2	0.001	1.39333	10.4443	8.20993e-07	3.96961e-05	Up
lnc-MSTRG.1905.3	0.001	1.48	10.5314	1.24172e-06	5.92382e-05	Up
lnc-MSTRG.13029.1	1.38667	0.0733333	-4.24101	1.44089e-06	6.78357e-05	Down
lnc-MSTRG.4320.1	0.001	2.53667	11.3087	1.5394e-06	7.1532e-05	Up
lnc-MSTRG.16549.1	0.08	4.36	5.76818	1.83203e-06	8.39961e-05	Up
lnc-MSTRG.7242.1	8.5	55.7067	2.71232	1.85458e-06	8.39961e-05	Up
lnc-MSTRG.28052.1	0.001	1.28333	10.3257	1.92482e-06	8.60876e-05	Up
lnc-MSTRG.7840.1	7.46	0.316667	-4.55814	1.97113e-06	8.70703e-05	Down
lnc-MSTRG.8088.2	0.001	1.39333	10.4443	2.2845e-06	9.96822e-05	Up
lnc-MSTRG.22160.1	4.53	1.08	-2.06848	2.79327e-06	0.000120414	Down
lnc-MSTRG.26152.3	0.156667	6.08333	5.27909	2.83045e-06	0.000120564	Up
lnc-MSTRG.25923.2	0.001	0.97	9.92184	3.07903e-06	0.000129609	Up
lnc-MSTRG.23985.1	0.04	2.05	5.67948	3.16903e-06	0.000131846	Up
lnc-MSTRG.33188.1	0.243333	4.76667	4.29197	3.23849e-06	0.000133188	Up
lnc-MSTRG.32913.1	0.93	0.001	-9.86109	3.54469e-06	0.000144124	Down
lnc-MSTRG.23939.1	0.93	0.001	-9.86109	3.985e-06	0.000160206	Down
lnc-MSTRG.29717.1	25.4867	5.45333	-2.22453	4.12304e-06	0.000163914	Down
lnc-MSTRG.22127.1	1.16667	0.001	-10.1882	4.28626e-06	0.00016853	Down
lnc-MSTRG.26578.2	0.636667	5.50333	3.1117	5.08059e-06	0.000197591	Up
lnc-MSTRG.25316.2	14.4767	1.88	-2.94492	5.25116e-06	0.000202029	Down
lnc-MSTRG.32256.2	0.886667	7.53667	3.08746	5.46319e-06	0.000207466	Up
lnc-MSTRG.1848.1	1.87667	0.001	-10.874	5.50846e-06	0.000207466	Down
lnc-MSTRG.26281.1	15.1767	3.36333	-2.17389	5.62926e-06	0.000209807	Down
lnc-MSTRG.23119.1	1.39	0.001	-10.4409	5.70815e-06	0.000210554	Down
lnc-MSTRG.27147.1	0.0966667	8.27	6.41873	5.84103e-06	0.000213257	Up
lnc-MSTRG.24306.1	0.0966667	3.51333	5.18368	6.00108e-06	0.000216888	Up
lnc-MSTRG.14700.1	0.001	1.99	10.9586	7.04154e-06	0.000251946	Up
lnc-MSTRG.5656.2	3.96	14.3967	1.86216	7.59415e-06	0.000269028	Up
lnc-MSTRG.17433.1	5.93	0.956667	-2.63194	8.48798e-06	0.000296839	Down
lnc-MSTRG.4098.1	1.89333	0.05	-5.24286	8.54512e-06	0.000296839	Down
lnc-MSTRG.33869.1	0.116667	1.77	3.92329	8.69446e-06	0.000299123	Up
lnc-MSTRG.2564.2	0.61	6.82	3.48289	8.88466e-06	0.000302756	Up
lnc-MSTRG.18467.1	1.48333	0.0166667	-6.47573	9.25416e-06	0.000312372	Down
lnc-MSTRG.7143.2	1.97333	9.75333	2.30526	9.65679e-06	0.000320903	Up
lnc-MSTRG.23511.1	0.506667	2.96667	2.54973	9.68629e-06	0.000320903	Up
lnc-MSTRG.24615.2	2.45	0.0833333	-4.87774	9.89064e-06	0.000323671	Down
lnc-MSTRG.22512.1	0.986667	0.001	-9.94642	9.95074e-06	0.000323671	Down
lnc-MSTRG.34171.1	4.4	0.001	-12.1033	1.04746e-05	0.00033764	Down
lnc-MSTRG.18447.1	4.46667	0.966667	-2.20811	1.07276e-05	0.000342708	Down
lnc-MSTRG.13788.2	5.51	1.25333	-2.13628	1.11878e-05	0.000354248	Down
lnc-MSTRG.26433.1	2.07	0.001	-11.0154	1.19896e-05	0.000376307	Down
lnc-MSTRG.34275.1	124.477	16.1567	-2.94567	1.2713e-05	0.00039554	Down
lnc-MSTRG.12379.1	2.27333	0.326667	-2.79892	1.29968e-05	0.000400885	Down
lnc-MSTRG.24331.1	6.62667	0.61	-3.4414	1.35393e-05	0.000414049	Down
lnc-MSTRG.28184.1	1.91667	0.0233333	-6.36006	1.41632e-05	0.000429456	Down
lnc-MSTRG.28888.1	1.18	0.0366667	-5.00817	1.43996e-05	0.000432955	Down
lnc-MSTRG.5914.1	2.11667	0.116667	-4.18133	1.4809e-05	0.000441556	Down
lnc-MSTRG.2427.1	4	0.0866667	-5.52838	1.50962e-05	0.000444508	Down
lnc-MSTRG.13615.1	7.84667	0.516667	-3.92477	1.51565e-05	0.000444508	Down
lnc-MSTRG.17866.1	0.41	2.96667	2.85515	1.54442e-05	0.000449263	Up
lnc-MSTRG.8689.1	1.15667	5.81333	2.32939	1.75567e-05	0.000506597	Up
lnc-MSTRG.24186.2	0.243333	3.43667	3.82	1.97488e-05	0.000565289	Up
lnc-MSTRG.32235.1	13.2667	4.89	-1.4399	2.09633e-05	0.000595292	Down
lnc-MSTRG.24407.1	0.9	6.89333	2.9372	2.17882e-05	0.000613844	Up
lnc-MSTRG.17251.5	0.001	1.64333	10.6824	2.22949e-05	0.000621214	Up
lnc-MSTRG.30135.1	2.12	0.283333	-2.90349	2.2397e-05	0.000621214	Down
lnc-MSTRG.32556.1	0.001	2.77333	11.4374	2.3928e-05	0.0006538	Up
lnc-MSTRG.25650.2	1.56	0.001	-10.6073	2.39373e-05	0.0006538	Down
lnc-MSTRG.19220.1	0.16	4.15333	4.69813	2.57421e-05	0.00069733	Up
lnc-MSTRG.32514.1	4.66667	0.62	-2.91205	2.59209e-05	0.00069733	Down
lnc-MSTRG.29531.2	10.8	0.39	-4.79141	2.75669e-05	0.000736079	Down
lnc-MSTRG.8560.1	1.28667	0.0133333	-6.59246	2.83793e-05	0.000752156	Down
lnc-MSTRG.22072.2	4.12667	54.1867	3.71489	3.00276e-05	0.00078999	Up
lnc-MSTRG.26052.1	2.78	12.82	2.20524	3.04831e-05	0.00079612	Up
lnc-MSTRG.28277.1	2.59333	0.0733333	-5.14419	3.83211e-05	0.000993572	Down
lnc-MSTRG.14465.1	1.25667	0.0866667	-3.85798	4.18827e-05	0.00107423	Down
lnc-MSTRG.13213.2	0.02	0.77	5.26679	4.20326e-05	0.00107423	Up
lnc-MSTRG.20885.1	5.67667	20.8733	1.87855	4.31185e-05	0.00109417	Up
lnc-MSTRG.21339.3	0.0366667	2.00667	5.77419	4.35968e-05	0.00109852	Up
lnc-MSTRG.34249.1	2.80333	1.1	-1.34964	4.42528e-05	0.00110725	Down
lnc-MSTRG.17279.1	2.10333	11.35	2.43194	4.46576e-05	0.00110962	Up
lnc-MSTRG.16634.1	1.14	0.001	-10.1548	4.54888e-05	0.00112248	Down
lnc-MSTRG.3736.7	0.09	2.15667	4.58273	4.67718e-05	0.00114623	Up
lnc-MSTRG.29930.1	2.68333	0.296667	-3.17711	4.74803e-05	0.00115568	Down
lnc-MSTRG.1955.1	1.56	0.113333	-3.7829	4.86188e-05	0.00117403	Down
lnc-MSTRG.16002.1	0.203333	4.46333	4.4562	4.88906e-05	0.00117403	Up
lnc-MSTRG.32790.1	0.476667	9.61333	4.33398	5.1572e-05	0.00122702	Up
lnc-MSTRG.18607.1	1.10333	4.08333	1.88788	5.17831e-05	0.00122702	Up
lnc-MSTRG.23223.3	4.77	1.51	-1.65944	5.24606e-05	0.0012349	Down
lnc-MSTRG.4320.2	0.001	2.08333	11.0247	5.33971e-05	0.00124872	Up
lnc-MSTRG.24133.1	4.39667	15.0867	1.77879	5.44436e-05	0.00126493	Up
lnc-MSTRG.3364.1	1.08333	0.001	-10.0813	5.85915e-05	0.00135252	Down
lnc-MSTRG.13774.1	4.16333	0.503333	-3.04815	6.067e-05	0.00139057	Down
lnc-MSTRG.3787.2	1.81333	0.51	-1.83007	6.12559e-05	0.00139057	Down
lnc-MSTRG.17569.3	2.90667	0.393333	-2.88554	6.14059e-05	0.00139057	Down
lnc-MSTRG.17925.1	4.51	1.70333	-1.40477	6.23784e-05	0.00140371	Down
lnc-MSTRG.33842.1	1.44667	0.0166667	-6.43962	6.75384e-05	0.00151033	Down
lnc-MSTRG.18545.1	10.0833	2.64333	-1.93154	6.91087e-05	0.00153585	Down
lnc-MSTRG.2462.1	1.72	0.07	-4.61891	7.09835e-05	0.00156777	Down
lnc-MSTRG.10434.2	1.98	0.36	-2.45943	7.19412e-05	0.00157917	Down
lnc-MSTRG.21314.1	2.11667	0.106667	-4.31061	8.23677e-05	0.00178515	Down
lnc-MSTRG.29467.2	0.0333333	1.50333	5.49506	8.24139e-05	0.00178515	Up
lnc-MSTRG.6153.1	0.346667	2.08	2.58496	8.28213e-05	0.00178515	Up
lnc-MSTRG.12366.1	0.0433333	1.99667	5.52597	8.58511e-05	0.00183844	Up
lnc-MSTRG.29988.1	0.39	5.05	3.69474	8.70894e-05	0.00183844	Up
lnc-MSTRG.13922.1	0.0233333	1.81333	6.28011	8.72334e-05	0.00183844	Up
lnc-MSTRG.21142.1	0.27	4.28667	3.98882	8.73489e-05	0.00183844	Up
lnc-MSTRG.22461.1	1.37333	0.0466667	-4.87915	9.04504e-05	0.00189258	Down
lnc-MSTRG.21020.1	407.49	91.5933	-2.15345	9.22551e-05	0.00191912	Down
lnc-MSTRG.8798.1	0.001	1	9.96578	9.4274e-05	0.00194978	Up
lnc-MSTRG.17105.2	0.403333	3.45667	3.09934	9.77284e-05	0.00200961	Up
lnc-MSTRG.28230.1	0.116667	1.98667	4.08989	9.8545e-05	0.00201482	Up
lnc-MSTRG.118.4	0.46	4.81	3.38633	0.000100273	0.00203851	Up
lnc-MSTRG.22613.1	0.77	8.44	3.45431	0.000104774	0.00211796	Up
lnc-MSTRG.6152.1	0.1	1.89	4.24031	0.00010568	0.00212428	Up
lnc-MSTRG.27427.1	3.89667	0.383333	-3.34557	0.000112673	0.00225219	Down
lnc-MSTRG.24523.1	9.32667	1.27	-2.87653	0.000116725	0.00232023	Down
lnc-MSTRG.14313.1	0.001	1.60333	10.6469	0.000119955	0.00237126	Up
lnc-MSTRG.12644.1	9.11333	2.87333	-1.66525	0.000120729	0.00237344	Down
lnc-MSTRG.28598.1	0.0666667	1.57333	4.56071	0.000130848	0.00254766	Up
lnc-MSTRG.10371.4	1.79333	0.313333	-2.51687	0.000131014	0.00254766	Down
lnc-MSTRG.21537.2	3.02333	10.51	1.79755	0.000137191	0.00265334	Up
lnc-MSTRG.19483.1	0.001	1.12667	10.1378	0.0001411	0.00271429	Up
lnc-MSTRG.3163.1	1.13333	4.12	1.86207	0.000160155	0.00306436	Up
lnc-MSTRG.4874.1	1.8	0.123333	-3.86736	0.000163997	0.00312117	Down
lnc-MSTRG.4886.1	0.0333333	1.36333	5.35403	0.000171373	0.0032443	Up
lnc-MSTRG.20162.1	0.001	1.12667	10.1378	0.000179493	0.00338014	Up
lnc-MSTRG.17897.2	0.001	1.71333	10.7426	0.000191166	0.00358111	Up
lnc-MSTRG.18995.1	1.32	0.0366667	-5.16993	0.000195162	0.00363692	Down
lnc-MSTRG.32854.1	0.0966667	2.37	4.61572	0.000200687	0.0037205	Up
lnc-MSTRG.4951.1	0.116667	2.71	4.53783	0.000226654	0.00418025	Up
lnc-MSTRG.4099.1	2.27333	0.483333	-2.23372	0.000234732	0.00430704	Down
lnc-MSTRG.2643.1	4.45	1.22	-1.86692	0.000242533	0.00439632	Down
lnc-MSTRG.9750.1	1.47667	0.476667	-1.63129	0.000242763	0.00439632	Down
lnc-MSTRG.5788.1	13.3567	4.85	-1.4615	0.000243284	0.00439632	Down
lnc-MSTRG.7881.1	6.19667	28.8033	2.21667	0.00024807	0.00446028	Up
lnc-MSTRG.34245.1	3.88	1.69	-1.19903	0.000253361	0.00453262	Down
lnc-MSTRG.32084.1	0.196667	2.02667	3.36528	0.000258068	0.00459387	Up
lnc-MSTRG.22399.2	0.0666667	1.33333	4.32193	0.000273729	0.00484853	Up
lnc-MSTRG.15156.1	10.8267	2.82	-1.94082	0.000297295	0.00524	Down
lnc-MSTRG.26064.1	0.723333	6.49667	3.16697	0.000299924	0.00526044	Up
lnc-MSTRG.30460.3	0.08	2.39667	4.90489	0.000306713	0.00535327	Up
lnc-MSTRG.32773.2	0.15	1.39	3.21205	0.000327331	0.00568539	Up
lnc-MSTRG.12045.1	0.983333	0.001	-9.94154	0.000336873	0.00582285	Down
lnc-MSTRG.23230.1	0.0433333	1.09	4.65271	0.000339302	0.00583665	Up
lnc-MSTRG.21339.2	0.0866667	2.78	5.00346	0.000349052	0.00592992	Up
lnc-MSTRG.27781.1	3.63333	15.53	2.09569	0.000349432	0.00592992	Up
lnc-MSTRG.23620.1	2.28667	0.546667	-2.06451	0.000349696	0.00592992	Down
lnc-MSTRG.9538.2	0.296667	2.16	2.86412	0.000351656	0.00593071	Up
lnc-MSTRG.19584.1	1.74333	6.98667	2.00276	0.000353058	0.00593071	Up
lnc-MSTRG.11473.1	0.28	3.18333	3.50704	0.000358136	0.00596304	Up
lnc-MSTRG.27136.2	4.61667	1.35667	-1.76679	0.000358316	0.00596304	Down
lnc-MSTRG.15807.1	1.91333	0.256667	-2.89812	0.000364091	0.00603109	Down
lnc-MSTRG.29532.1	14.81	3.57667	-2.04988	0.000390911	0.00643159	Down
lnc-MSTRG.27999.3	0.02	1.15667	5.85383	0.000391863	0.00643159	Up
lnc-MSTRG.17619.1	1.91333	0.001	-10.9019	0.000395884	0.00646791	Down
lnc-MSTRG.29130.1	0.0266667	1.08667	5.34873	0.00039912	0.00647738	Up
lnc-MSTRG.32795.1	2.29333	0.34	-2.75384	0.000400084	0.00647738	Down
lnc-MSTRG.29747.1	6.9	2.76	-1.32193	0.000409102	0.00659355	Down
lnc-MSTRG.20356.1	0.001	1.25667	10.2954	0.0004154	0.00665677	Up
lnc-MSTRG.33140.1	1.19	0.0166667	-6.15785	0.000416746	0.00665677	Down
lnc-MSTRG.30285.1	0.001	1.02	9.99435	0.000423572	0.00673573	Up
lnc-MSTRG.21613.1	0.523333	3.59333	2.77952	0.000428695	0.0067604	Up
lnc-MSTRG.10388.1	1.90667	0.126667	-3.91194	0.000429664	0.0067604	Down
lnc-MSTRG.23983.1	0.001	0.87	9.76487	0.000431735	0.0067604	Up
lnc-MSTRG.25010.4	1.66333	15.6067	3.23001	0.000432681	0.0067604	Up
lnc-MSTRG.7222.1	4.06667	0.593333	-2.77693	0.000434987	0.00676688	Down
lnc-MSTRG.11462.1	1.34333	0.001	-10.3916	0.00043785	0.00678194	Down
lnc-MSTRG.2426.1	0.0333333	1.73667	5.70321	0.000446642	0.00688829	Up
lnc-MSTRG.28108.1	3.50333	0.666667	-2.39369	0.000489839	0.00751959	Down
lnc-MSTRG.9431.1	1.88	5.23667	1.47792	0.000491779	0.00751959	Up
lnc-MSTRG.16551.1	1	0.0733333	-3.76939	0.000508388	0.00770864	Down
lnc-MSTRG.10523.1	0.08	1.13333	3.82443	0.000508451	0.00770864	Up
lnc-MSTRG.9679.2	44.5333	11.03	-2.01345	0.000523898	0.00790931	Down
lnc-MSTRG.22341.1	2.21667	0.463333	-2.25827	0.000533814	0.00802515	Down
lnc-MSTRG.7780.1	0.246667	2.49333	3.33744	0.000540818	0.00809643	Up
lnc-MSTRG.10998.2	1.92	0.236667	-3.02018	0.000553549	0.00825249	Down
lnc-MSTRG.17034.2	0.0366667	1.55333	5.40475	0.000560113	0.00830856	Up
lnc-MSTRG.18804.1	1.23	0.143333	-3.10121	0.000564274	0.00830856	Down
lnc-MSTRG.19857.5	0.0466667	0.866667	4.21501	0.000564276	0.00830856	Up
lnc-MSTRG.23334.1	5.14	1.18	-2.12298	0.000578831	0.00847062	Down
lnc-MSTRG.34257.1	7.98	3.34333	-1.2551	0.000580017	0.00847062	Down
lnc-MSTRG.2857.1	2.84667	0.663333	-2.10147	0.000591406	0.00860183	Down
lnc-MSTRG.17558.1	11.9633	3.54	-1.7568	0.000610953	0.00885017	Down
lnc-MSTRG.2514.1	3.18333	0.433333	-2.87699	0.000613851	0.00885629	Down
lnc-MSTRG.8253.1	0.153333	2.33	3.92559	0.000640364	0.00920169	Up
lnc-MSTRG.21438.1	0.0433333	1.15333	4.73419	0.000671956	0.00959729	Up
lnc-MSTRG.2954.2	0.82	0.08	-3.35755	0.000673259	0.00959729	Down
lnc-MSTRG.25547.2	4.19667	0.3	-3.80621	0.000686485	0.009747	Down
lnc-MSTRG.22912.1	1.46333	4.81667	1.71878	0.00070349	0.00994896	Up
lnc-MSTRG.5902.1	0.933333	0.0166667	-5.80735	0.000717742	0.0101106	Down
lnc-MSTRG.21828.1	6.67	1.98333	-1.74976	0.000725505	0.0101309	Down
lnc-MSTRG.5330.1	1.52333	0.126667	-3.58812	0.000726968	0.0101309	Down
lnc-MSTRG.694.1	2.88333	0.763333	-1.91735	0.000727678	0.0101309	Down
lnc-MSTRG.23378.1	1.48667	0.14	-3.40858	0.00073572	0.0102031	Down
lnc-MSTRG.6186.1	6.72667	3.16333	-1.08845	0.000741434	0.0102427	Down
lnc-MSTRG.25367.1	55.33	25.6267	-1.11042	0.000748285	0.0102976	Down
lnc-MSTRG.29467.4	0.213333	3.16	3.88874	0.000763742	0.0104557	Up
lnc-MSTRG.23813.1	1.53667	0.256667	-2.58184	0.000765618	0.0104557	Down
lnc-MSTRG.31178.1	3.34	0.713333	-2.2272	0.00077208	0.0105038	Down
lnc-MSTRG.14121.1	1.39667	0.303333	-2.20301	0.000813345	0.0109825	Down
lnc-MSTRG.13688.1	2.49333	9.98667	2.00193	0.000813405	0.0109825	Up
lnc-MSTRG.6752.1	1.31667	0.001	-10.3627	0.000822674	0.0110659	Down
lnc-MSTRG.33659.1	1.08	5.63	2.3821	0.000855161	0.0114598	Up
lnc-MSTRG.11983.1	0.001	1.7	10.7313	0.000867711	0.0115846	Up
lnc-MSTRG.23482.2	4.22333	0.97	-2.12233	0.000887602	0.0118061	Down
lnc-MSTRG.873.1	2.27	9.85333	2.11792	0.000895117	0.0118217	Up
lnc-MSTRG.24199.1	0.25	2.96667	3.56884	0.000896048	0.0118217	Up
lnc-MSTRG.7648.1	1.02	0.001	-9.99435	0.000898687	0.0118217	Down
lnc-MSTRG.19787.1	0.8	0.09	-3.152	0.000908742	0.0119102	Down
lnc-MSTRG.16266.1	0.133333	1.79	3.74685	0.000923802	0.0120634	Up
lnc-MSTRG.5384.1	0.11	1.51	3.77897	0.000937967	0.0122038	Up
lnc-MSTRG.32962.1	2.27	0.22	-3.36712	0.000947482	0.0122829	Down
lnc-MSTRG.33086.1	1.58333	0.226667	-2.80432	0.00096473	0.0124614	Down
lnc-MSTRG.18607.2	0.2	1.09667	2.45505	0.000980323	0.0126172	Up
lnc-MSTRG.10166.3	18.6733	1.35333	-3.78639	0.00101948	0.0130742	Down
lnc-MSTRG.5477.1	207.767	46.71	-2.15316	0.00103541	0.0132305	Down
lnc-MSTRG.10652.1	1.23333	0.153333	-3.00782	0.00103906	0.0132305	Down
lnc-MSTRG.7653.1	0.93	0.103333	-3.16993	0.0010671	0.0135393	Down
lnc-MSTRG.18996.2	1.44667	0.136667	-3.404	0.00108167	0.0136757	Down
lnc-MSTRG.32271.1	12.1533	3.50333	-1.79455	0.00109842	0.0138385	Down
lnc-MSTRG.23626.1	10.3567	3.34667	-1.62976	0.00111417	0.0139739	Down
lnc-MSTRG.1905.2	0.0166667	0.693333	5.37851	0.00111698	0.0139739	Up
lnc-MSTRG.8943.1	1.17667	0.146667	-3.00409	0.00116472	0.0145047	Down
lnc-MSTRG.23198.1	0.17	2.36667	3.79925	0.00116751	0.0145047	Up
lnc-MSTRG.16490.1	50.4933	13.9533	-1.85548	0.00121617	0.0150569	Down
lnc-MSTRG.34501.1	1.21333	0.12	-3.33787	0.00123085	0.0151861	Down
lnc-MSTRG.12644.2	33.1633	2.04667	-4.01824	0.001244	0.0152957	Down
lnc-MSTRG.1742.1	0.001	1.57667	10.6227	0.00127971	0.0156281	Up
lnc-MSTRG.23223.2	0.993333	0.15	-2.72732	0.00127978	0.0156281	Down
lnc-MSTRG.18988.3	0.0566667	1.11667	4.30055	0.0013115	0.015961	Up
lnc-MSTRG.25631.1	2.05	0.446667	-2.19835	0.00132655	0.0160895	Down
lnc-MSTRG.15127.1	2.97333	0.0966667	-4.94292	0.00134239	0.0162266	Down
lnc-MSTRG.12993.1	7.55667	0.593333	-3.67084	0.00137024	0.0165075	Down
lnc-MSTRG.27673.2	1.27	0.323333	-1.97373	0.0014614	0.0175466	Down
lnc-MSTRG.20943.1	33.5967	102.227	1.60538	0.00147692	0.0176415	Up
lnc-MSTRG.662.1	0.946667	0.001	-9.88671	0.00147917	0.0176415	Down
lnc-MSTRG.26159.1	1.49	0.246667	-2.59468	0.00151189	0.0179719	Down
lnc-MSTRG.29724.1	0.13	1.37	3.39759	0.00152689	0.01809	Up
lnc-MSTRG.13779.1	0.283333	2.94333	3.37688	0.00155055	0.0183098	Up
lnc-MSTRG.30533.1	1.61667	0.001	-10.6588	0.00159511	0.018774	Down
lnc-MSTRG.32157.1	2.50667	0.57	-2.13674	0.00164363	0.0192816	Down
lnc-MSTRG.8420.1	0.001	1.25	10.2877	0.00166256	0.0194399	Up
lnc-MSTRG.9681.2	0.07	0.59	3.07529	0.00167983	0.0195779	Up
lnc-MSTRG.13259.1	1.13333	0.0533333	-4.40939	0.00170899	0.0198531	Down
lnc-MSTRG.16552.1	2.11	0.296667	-2.83033	0.00172896	0.0199869	Down
lnc-MSTRG.3303.1	0.001	0.973333	9.92679	0.00173168	0.0199869	Up
lnc-MSTRG.13049.1	1.02	3.48	1.77052	0.00174687	0.0200975	Up
lnc-MSTRG.34050.1	7.12333	2.85	-1.32159	0.00176873	0.0202837	Down
lnc-MSTRG.29944.1	1.64333	0.43	-1.93422	0.0017885	0.0204448	Down
lnc-MSTRG.16992.2	2.71333	0.44	-2.62449	0.00186048	0.0212	Down
lnc-MSTRG.9417.1	8.73	34.7867	1.99448	0.0018748	0.0212954	Up
lnc-MSTRG.9317.1	1.81	0.363333	-2.31662	0.00190716	0.0215519	Down
lnc-MSTRG.33111.1	0.0666667	1.20667	4.17792	0.00190943	0.0215519	Up
lnc-MSTRG.14734.1	1.62667	0.143333	-3.50447	0.00192326	0.0216397	Down
lnc-MSTRG.13231.1	12.8933	3.27	-1.97926	0.00194606	0.0218276	Down
lnc-MSTRG.32065.1	1.27	0.246667	-2.36419	0.00196727	0.0219966	Down
lnc-MSTRG.2200.1	2.20667	0.806667	-1.45182	0.00198391	0.0221135	Down
lnc-MSTRG.18381.2	0.546667	0.0433333	-3.65711	0.00199366	0.0221532	Down
lnc-MSTRG.10371.3	4.19667	1.27	-1.72442	0.00206315	0.0228342	Down
lnc-MSTRG.6694.1	10.33	4.36	-1.24444	0.00206771	0.0228342	Down
lnc-MSTRG.10850.1	0.05	0.65	3.70044	0.00211597	0.0232756	Up
lnc-MSTRG.30704.1	1.06333	4.48	2.0749	0.00212069	0.0232756	Up
lnc-MSTRG.4990.1	0.936667	0.001	-9.87139	0.00213188	0.0233268	Down
lnc-MSTRG.21519.1	6.90333	2.06667	-1.73999	0.0021398	0.0233387	Down
lnc-MSTRG.11791.1	1.02	0.0933333	-3.45003	0.00214601	0.0233387	Down
lnc-MSTRG.2639.1	2.48667	0.27	-3.20318	0.00219032	0.0237484	Down
lnc-MSTRG.21315.1	0.463333	3.94	3.08807	0.00224973	0.0243188	Up
lnc-MSTRG.2406.4	14.4033	4.48333	-1.68376	0.00231413	0.024871	Down
lnc-MSTRG.10362.1	4.50333	1.28333	-1.8111	0.00231471	0.024871	Down
lnc-MSTRG.13283.1	2.92333	0.986667	-1.56698	0.00238253	0.025523	Down
lnc-MSTRG.5987.1	3.92	1.76	-1.15528	0.00239294	0.025558	Down
lnc-MSTRG.32698.1	0.483333	0.001	-8.91687	0.00242965	0.0258363	Down
lnc-MSTRG.20661.1	1.28667	0.0633333	-4.34453	0.00243441	0.0258363	Down
lnc-MSTRG.4886.2	0.0966667	1.15333	3.57665	0.00244066	0.0258363	Up
lnc-MSTRG.19426.2	9.80667	24.1433	1.29979	0.00244883	0.0258463	Up
lnc-MSTRG.6154.1	0.001	0.893333	9.80305	0.00246593	0.0259503	Up
lnc-MSTRG.18949.1	0.44	6.1	3.79323	0.00253415	0.02659	Up
lnc-MSTRG.29467.3	0.616667	3.92667	2.67074	0.00255048	0.0266731	Up
lnc-MSTRG.11163.3	0.1	3.31	5.04876	0.00255698	0.0266731	Up
lnc-MSTRG.1905.4	0.35	2.30333	2.7183	0.00257012	0.0267322	Up
lnc-MSTRG.18795.1	0.796667	0.001	-9.63783	0.00260732	0.0269728	Down
lnc-MSTRG.21167.2	1.03333	3.76333	1.86471	0.00260832	0.0269728	Up
lnc-MSTRG.20496.1	28.7067	99.67	1.79577	0.00262643	0.0270818	Up
lnc-MSTRG.15630.1	0.366667	0.0633333	-2.53343	0.00273285	0.0280981	Down
lnc-MSTRG.32134.1	57.0767	25.2767	-1.17509	0.00275466	0.0282412	Down
lnc-MSTRG.29713.1	0.946667	0.1	-3.24286	0.00278012	0.0284208	Down
lnc-MSTRG.24029.1	6.35667	1.68333	-1.91695	0.00282047	0.0287512	Down
lnc-MSTRG.13245.1	0.09	1.02667	3.5119	0.00288789	0.0293548	Up
lnc-MSTRG.24243.1	0.643333	2.92333	2.18398	0.0028968	0.0293619	Up
lnc-MSTRG.6870.1	0.001	1.06	10.0498	0.00294926	0.0298092	Up
lnc-MSTRG.12485.1	2.77667	0.346667	-3.00173	0.00298082	0.0299598	Down
lnc-MSTRG.34505.1	0.963333	0.2	-2.26804	0.00298091	0.0299598	Down
lnc-MSTRG.12163.2	0.97	0.05	-4.27798	0.00301776	0.0302453	Down
lnc-MSTRG.27763.1	4.60667	0.323333	-3.83263	0.00307811	0.0307639	Down
lnc-MSTRG.30273.1	0.24	1.60667	2.74296	0.00321915	0.0320839	Up
lnc-MSTRG.29477.1	1.98333	0.676667	-1.55141	0.00323667	0.0321021	Down
lnc-MSTRG.16051.1	1.25	4.19667	1.74732	0.00323892	0.0321021	Up
lnc-MSTRG.18996.1	1.88333	0.226667	-3.05464	0.00328377	0.0324461	Down
lnc-MSTRG.2427.2	3.89333	0.5	-2.96101	0.00329176	0.0324461	Down
lnc-MSTRG.15460.2	0.213333	2.41	3.49785	0.00331833	0.0325984	Up
lnc-MSTRG.10466.1	2.53	0.903333	-1.48581	0.00332605	0.0325984	Down
lnc-MSTRG.6871.1	2.68333	0.68	-1.98042	0.00333455	0.0325984	Down
lnc-MSTRG.30184.2	8.68	2.65333	-1.70989	0.00338276	0.0329796	Down
lnc-MSTRG.1026.1	2	6.94333	1.79563	0.00343918	0.0333712	Up
lnc-MSTRG.3018.1	0.001	1.21	10.2408	0.00344158	0.0333712	Up
lnc-MSTRG.2156.1	0.68	9.63333	3.82443	0.00346649	0.0335008	Up
lnc-MSTRG.19153.1	1.53333	0.176667	-3.11757	0.00347368	0.0335008	Down
lnc-MSTRG.31302.1	1.05	0.001	-10.0362	0.00349809	0.0336236	Down
lnc-MSTRG.27473.3	0.0866667	1.10333	3.67025	0.0035052	0.0336236	Up
lnc-MSTRG.21891.1	1.83	0.503333	-1.86226	0.00355893	0.0340478	Down
lnc-MSTRG.20470.1	1.59	0.416667	-1.93206	0.00359407	0.0342923	Down
lnc-MSTRG.10898.1	0.163333	1.07333	2.71621	0.00360516	0.0343066	Up
lnc-MSTRG.24638.1	15.97	6.29	-1.34423	0.00364647	0.0346076	Down
lnc-MSTRG.6634.1	1.49667	4.77333	1.67324	0.0036599	0.0346432	Up
lnc-MSTRG.22147.3	1.48	0.153333	-3.27085	0.00368264	0.0347665	Down
lnc-MSTRG.5529.1	0.923333	0.03	-4.94382	0.00370624	0.0348972	Down
lnc-MSTRG.3450.1	1.00667	5.73	2.50895	0.00376737	0.0353796	Up
lnc-MSTRG.24119.1	1.37333	0.163333	-3.07179	0.00386931	0.0362419	Down
lnc-MSTRG.8178.1	2.94667	0.2	-3.88101	0.00391529	0.0365768	Down
lnc-MSTRG.19255.1	0.516667	1.64667	1.67224	0.0039747	0.0369971	Up
lnc-MSTRG.21529.3	16.3767	8.45333	-0.954049	0.00398208	0.0369971	No
lnc-MSTRG.1171.1	2.11667	0.663333	-1.67399	0.00399857	0.0369971	Down
lnc-MSTRG.1111.1	27.8933	7.22667	-1.94852	0.00400164	0.0369971	Down
lnc-MSTRG.31433.1	1.55	11.6167	2.90586	0.00410435	0.0378489	Up
lnc-MSTRG.1788.1	24.71	53.2533	1.10778	0.00412129	0.0379074	Up
lnc-MSTRG.9949.1	0.903333	0.001	-9.81911	0.00417083	0.0382353	Down
lnc-MSTRG.21881.1	0.776667	0.15	-2.37233	0.00417831	0.0382353	Down
lnc-MSTRG.33320.2	8.07	27.7567	1.78219	0.00419452	0.0382857	Up
lnc-MSTRG.7180.1	0.08	0.693333	3.11548	0.00421587	0.0383826	Up
lnc-MSTRG.21699.1	0.863333	2.58	1.57938	0.00424579	0.038557	Up
lnc-MSTRG.33661.1	0.26	1.74333	2.74526	0.00431682	0.0390601	Up
lnc-MSTRG.21593.6	1.88333	0.726667	-1.37392	0.00432303	0.0390601	Down
lnc-MSTRG.23906.1	1.19333	0.326667	-1.86911	0.00471946	0.0425346	Down
lnc-MSTRG.10739.1	1.51333	0.303333	-2.31875	0.00474058	0.0426175	Down
lnc-MSTRG.417.1	1.15	0.103333	-3.47626	0.00475574	0.0426467	Down
lnc-MSTRG.12607.1	0.163333	1.23667	2.92057	0.00478875	0.042815	Up
lnc-MSTRG.26261.1	0.896667	0.001	-9.80843	0.00480107	0.042815	Down
lnc-MSTRG.3152.3	0.936667	4.12667	2.13937	0.00481041	0.042815	Up
lnc-MSTRG.13416.2	1.16667	3.56	1.60948	0.00486621	0.0432042	Up
lnc-MSTRG.3096.1	0.613333	2.29667	1.9048	0.00491702	0.0435473	Up
lnc-MSTRG.26580.1	0.103333	1.28667	3.63826	0.00496412	0.0438558	Up
lnc-MSTRG.8300.1	0.846667	3.32667	1.97421	0.00502413	0.0442683	Up
lnc-MSTRG.7387.1	0.283333	1.79	2.65939	0.00503555	0.0442683	Up
lnc-MSTRG.12647.1	1.17333	0.0533333	-4.45943	0.0052126	0.0456697	Down
lnc-MSTRG.17852.1	3.11333	9.12333	1.5511	0.00522049	0.0456697	Up
lnc-MSTRG.32027.2	17.1433	1.77333	-3.27311	0.0052418	0.0457074	Down
lnc-MSTRG.10215.1	0.0266667	0.973333	5.18982	0.00525034	0.0457074	Up
lnc-MSTRG.212.1	2.46667	0.686667	-1.84488	0.0052975	0.046006	Down
lnc-MSTRG.4555.1	0.001	0.683333	9.41645	0.00533469	0.0462168	Up
lnc-MSTRG.11888.1	0.923333	0.226667	-2.02628	0.00535358	0.0462684	Down
lnc-MSTRG.1289.1	0.346667	0.001	-8.43741	0.00552851	0.047637	Down
lnc-MSTRG.12442.1	7.31	3.89333	-0.908866	0.00553857	0.047637	No
lnc-MSTRG.10432.1	1.23667	5.83333	2.23786	0.00561798	0.0482042	Up
lnc-MSTRG.32132.1	22.7833	10.1	-1.17362	0.005649	0.0483544	Down
lnc-MSTRG.930.3	0.78	0.0633333	-3.62244	0.00578659	0.0494139	Down
lnc-MSTRG.34322.1	4.95667	1.65667	-1.58109	0.00585431	0.0498731	Down
lnc-MSTRG.34110.1	0.616667	3.12	2.33898	0.00592905	0.0503512	Up
lnc-MSTRG.17349.1	1.28333	0.2	-2.68182	0.00593857	0.0503512	Down
lnc-MSTRG.9440.1	0.336667	1.74	2.36969	0.00601189	0.0508524	Up
lnc-MSTRG.31584.2	4.68	0.79	-2.56658	0.00603836	0.0509558	Down
lnc-MSTRG.29028.2	0.686667	2.68	1.96455	0.00607203	0.0511193	Up
lnc-MSTRG.24755.4	0.943333	3.82	2.01773	0.00624874	0.0523718	Up
lnc-MSTRG.184.2	0.0366667	1.04	4.82597	0.0062581	0.0523718	Up
lnc-MSTRG.5535.1	0.001	0.66	9.36632	0.0062647	0.0523718	Up
lnc-MSTRG.25694.1	0.0533333	1.22	4.5157	0.00630201	0.0525608	Up
lnc-MSTRG.34267.1	2.59333	1.17667	-1.1401	0.00634708	0.0528136	Down
lnc-MSTRG.5548.2	0.43	0.001	-8.74819	0.00637212	0.0528989	Down
lnc-MSTRG.961.1	0.05	1.53667	4.94173	0.00638945	0.05292	Up
lnc-MSTRG.6122.1	0.32	1.38333	2.11201	0.00663046	0.0547894	Up
lnc-MSTRG.31531.3	1.19333	0.0333333	-5.16189	0.00665085	0.0548312	Down
lnc-MSTRG.23492.1	1.90333	5.74333	1.59336	0.00670952	0.0551877	Up
lnc-MSTRG.28324.1	6.51	3.22667	-1.01261	0.00677883	0.0555558	Down
lnc-MSTRG.997.8	0.001	0.426667	8.73697	0.00678533	0.0555558	Up
lnc-MSTRG.9791.1	0.001	1.12333	10.1336	0.00684045	0.0558793	Up
lnc-MSTRG.30286.1	3.04333	19.4967	2.6795	0.00689933	0.0562319	Up
lnc-MSTRG.26336.1	1.96	0.04	-5.61471	0.00697494	0.056719	Down
lnc-MSTRG.25795.1	5.63333	16.5467	1.55448	0.0070204	0.0569438	Up
lnc-MSTRG.16203.1	1.18	0.0566667	-4.38014	0.00703442	0.0569438	Down
lnc-MSTRG.17701.1	1.87333	0.346667	-2.43399	0.00707767	0.0571646	Down
lnc-MSTRG.25155.2	0.856667	2.99667	1.80655	0.00723843	0.0583313	Up
lnc-MSTRG.4873.1	2.49333	0.866667	-1.52453	0.00729473	0.0586529	Down
lnc-MSTRG.30345.1	0.0466667	0.903333	4.27479	0.00736	0.059045	Up
lnc-MSTRG.28572.1	0.0533333	1	4.22882	0.00738067	0.0590784	Up
lnc-MSTRG.27801.1	1.17333	0.133333	-3.1375	0.00752296	0.0599844	Down
lnc-MSTRG.18125.1	0.246667	1.24333	2.33358	0.00752739	0.0599844	Up
lnc-MSTRG.29753.2	0.05	0.493333	3.30256	0.00754781	0.0600135	Up
lnc-MSTRG.7818.2	0.796667	0.0966667	-3.04289	0.0076854	0.0609719	Down
lnc-MSTRG.26189.1	0.856667	2.60333	1.60355	0.00780812	0.0618085	Up
lnc-MSTRG.14761.1	0.263333	1.71	2.69903	0.00789032	0.0623213	Up
lnc-MSTRG.30048.1	0.0166667	0.513333	4.94486	0.00802711	0.0632621	Up
lnc-MSTRG.28885.1	34.9433	11.1633	-1.64625	0.00808552	0.0635824	Down
lnc-MSTRG.18153.2	0.506667	2.43667	2.2658	0.00814695	0.0638333	Up
lnc-MSTRG.21520.1	10.0367	4.01333	-1.32241	0.00815311	0.0638333	Down
lnc-MSTRG.24413.1	0.32	1.85667	2.53657	0.00841402	0.0657323	Up
lnc-MSTRG.17481.1	1.97667	8.76333	2.14841	0.00856601	0.0667027	Up
lnc-MSTRG.10642.1	1.03333	0.0966667	-3.41814	0.00857813	0.0667027	Down
lnc-MSTRG.15999.2	6.45667	1.58	-2.03086	0.00859417	0.0667027	Down
lnc-MSTRG.17672.1	0.62	0.001	-9.27612	0.00864153	0.0669251	Down
lnc-MSTRG.25851.1	1.16667	0.25	-2.22239	0.0087265	0.0673007	Down
lnc-MSTRG.33623.1	18.4467	8.76333	-1.07381	0.00872765	0.0673007	Down
lnc-MSTRG.5109.1	0.446667	1.57667	1.81961	0.00891946	0.068574	Up
lnc-MSTRG.9869.2	3.77667	1.94	-0.961057	0.0089311	0.068574	No
lnc-MSTRG.7395.1	0.916667	3.09333	1.75469	0.00897429	0.068758	Up
lnc-MSTRG.11555.1	0.38	1.25333	1.7217	0.00913117	0.0698105	Up
lnc-MSTRG.8496.2	0.573333	2.57	2.16432	0.00948801	0.0722702	Up
lnc-MSTRG.20625.1	0.0466667	1.41	4.91716	0.00949329	0.0722702	Up
lnc-MSTRG.15456.1	0.82	0.0233333	-5.13516	0.00955016	0.0725449	Down
lnc-MSTRG.5582.1	1.02333	0.0666667	-3.94017	0.00956992	0.0725449	Down
lnc-MSTRG.18717.1	0.756667	0.001	-9.56351	0.00966729	0.0728679	Down
lnc-MSTRG.33679.1	0.773333	0.001	-9.59495	0.00966729	0.0728679	Down
lnc-MSTRG.14211.5	0.0933333	0.54	2.5325	0.00967364	0.0728679	Up
lnc-MSTRG.5672.1	0.176667	1.06333	2.58949	0.00974394	0.0732433	Up
lnc-MSTRG.1796.1	0.15	1.19667	2.99599	0.00978077	0.073366	Up
lnc-MSTRG.28107.1	1.14667	0.21	-2.44898	0.00990859	0.0741693	Down
lnc-MSTRG.6550.1	0.923333	0.0866667	-3.4133	0.00995991	0.0743978	Down
lnc-MSTRG.31766.1	0.333333	1.95	2.54844	0.0101853	0.0758633	Up
lnc-MSTRG.27313.1	1.4	3.56	1.34645	0.0101985	0.0758633	Up
lnc-MSTRG.26615.1	0.313333	1.18	1.91302	0.0102376	0.075996	Up
lnc-MSTRG.30656.1	1.28	0.203333	-2.65423	0.0103053	0.0763402	Down
lnc-MSTRG.28166.2	14.52	38.9967	1.42531	0.0103982	0.0768696	Up
lnc-MSTRG.13591.1	0.001	0.92	9.84549	0.0104325	0.076964	Up
lnc-MSTRG.20993.3	1.24667	4.09	1.71403	0.0106163	0.0781583	Up
lnc-MSTRG.1164.4	1.43	3.46	1.27476	0.0106655	0.0783595	Up
lnc-MSTRG.4154.1	1.17	0.0466667	-4.64797	0.0107507	0.0788241	Down
lnc-MSTRG.4768.2	2.77	9.60333	1.79365	0.0109373	0.0800281	Up
lnc-MSTRG.33381.3	0.0766667	0.633333	3.04629	0.0110646	0.0807943	Up
lnc-MSTRG.12283.3	1.19	0.153333	-2.95622	0.0112355	0.081875	Down
lnc-MSTRG.741.1	1.92	1.00333	-0.936305	0.0113161	0.0822949	No
lnc-MSTRG.26259.1	1.19	3.34333	1.49033	0.011467	0.0832228	Up
lnc-MSTRG.21510.1	2.13	5.13333	1.26904	0.0115503	0.0836581	Up
lnc-MSTRG.5693.1	1.19	0.0166667	-6.15785	0.0116003	0.08385	Down
lnc-MSTRG.7251.1	0.0733333	2.08	4.82597	0.011885	0.0857353	Up
lnc-MSTRG.18269.1	2.26667	7.79333	1.78167	0.0119904	0.0861747	Up
lnc-MSTRG.16809.1	0.65	4.19667	2.69073	0.0119941	0.0861747	Up
lnc-MSTRG.12467.1	0.55	2.38667	2.11749	0.0121469	0.0870975	Up
lnc-MSTRG.15539.4	0.38	0.02	-4.24793	0.0122387	0.0873986	Down
lnc-MSTRG.13462.1	0.886667	0.213333	-2.05528	0.0122956	0.0873986	Down
lnc-MSTRG.30313.1	0.27	4.98	4.20511	0.0123064	0.0873986	Up
lnc-MSTRG.22810.1	0.06	0.83	3.79008	0.01231	0.0873986	Up
lnc-MSTRG.28722.1	2.42333	0.82	-1.5633	0.012311	0.0873986	Down
lnc-MSTRG.29403.1	1.05	0.216667	-2.27684	0.012404	0.0878843	Down
lnc-MSTRG.6117.2	0.913333	0.21	-2.12075	0.0124861	0.0882914	Down
lnc-MSTRG.4021.1	0.713333	0.0833333	-3.09761	0.0125425	0.0885146	Down
lnc-MSTRG.13356.1	0.5	0.0466667	-3.42146	0.0125972	0.0885574	Down
lnc-MSTRG.25668.1	7.21	3.63333	-0.988706	0.012598	0.0885574	No
lnc-MSTRG.20912.1	0.673333	0.001	-9.39518	0.0127308	0.0893153	Down
lnc-MSTRG.31069.7	0.001	1.28	10.3219	0.0130927	0.0916748	Up
lnc-MSTRG.5375.1	2.37333	5.21333	1.13529	0.0131504	0.091773	Up
lnc-MSTRG.21520.2	4.53	1.57333	-1.52569	0.0131617	0.091773	Down
lnc-MSTRG.21675.1	2.08	0.453333	-2.19794	0.0131837	0.091773	Down
lnc-MSTRG.7182.1	0.136667	2.74	4.32544	0.0133789	0.092951	Up
lnc-MSTRG.97.1	4.81	15.36	1.67507	0.0135535	0.0939812	Up
lnc-MSTRG.12120.1	1.07	0.16	-2.74147	0.0136916	0.0946951	Down
lnc-MSTRG.13917.3	0.03	0.733333	4.61143	0.0137093	0.0946951	Up
lnc-MSTRG.1704.1	0.6	0.0233333	-4.6845	0.0137553	0.0947797	Down
lnc-MSTRG.31995.1	2.31667	6.05333	1.38568	0.0137828	0.0947797	Up
lnc-MSTRG.15767.1	1.75667	0.446667	-1.97557	0.0138011	0.0947797	Down
lnc-MSTRG.23105.1	1.16667	0.396667	-1.55639	0.0139312	0.0954901	Down
lnc-MSTRG.23809.2	0.893333	0.243333	-1.87626	0.0141616	0.0968836	Down
lnc-MSTRG.29078.1	0.153333	3.28333	4.42042	0.014243	0.097255	Up
lnc-MSTRG.24319.1	0.3	1.39	2.21205	0.0143148	0.0975585	Up
lnc-MSTRG.2241.1	0.001	1.05667	10.0453	0.0143525	0.0976296	Up
lnc-MSTRG.34588.1	0.15	1.40667	3.22925	0.0144659	0.0982142	Up
lnc-MSTRG.18019.1	0.253333	1.74667	2.7855	0.0145408	0.0985356	Up
lnc-MSTRG.16130.1	2.04333	0.576667	-1.82512	0.0145863	0.0986573	Down
lnc-MSTRG.10830.1	1.65667	7.76333	2.22839	0.0146595	0.0989658	Up
lnc-MSTRG.7399.1	0.863333	0.146667	-2.55738	0.0147077	0.0990619	Down
lnc-MSTRG.7620.1	0.29	1.19667	2.0449	0.0147292	0.0990619	Up
lnc-MSTRG.23431.2	1.77	0.216667	-3.0302	0.0148988	0.0998283	Down
lnc-MSTRG.10124.1	0.766667	0.0966667	-2.98751	0.0148989	0.0998283	Down
lnc-MSTRG.30768.1	5.33667	2.75	-0.956507	0.0149747	0.100149	No
lnc-MSTRG.3764.1	1.05667	0.11	-3.26394	0.015228	0.101653	Down
lnc-MSTRG.8563.2	0.363333	1.49333	2.03917	0.0152897	0.101875	Up
lnc-MSTRG.26557.2	1.19333	0.426667	-1.48382	0.0153238	0.101912	Down
lnc-MSTRG.22148.1	8.85667	4.45667	-0.990799	0.0153871	0.102143	No
lnc-MSTRG.18061.1	1.42333	4.70667	1.72543	0.0154168	0.10215	Up
lnc-MSTRG.2664.2	1.71667	0.35	-2.29418	0.0155431	0.102761	Down
lnc-MSTRG.29076.1	0.693333	0.001	-9.43741	0.0155664	0.102761	Down
lnc-MSTRG.16326.1	0.0466667	0.766667	4.03814	0.0156814	0.103191	Up
lnc-MSTRG.12210.3	0.943333	2.81333	1.57644	0.0156892	0.103191	Up
lnc-MSTRG.24241.1	0.993333	0.0633333	-3.97124	0.0158097	0.103793	Down
lnc-MSTRG.10216.1	1.66667	0.683333	-1.2863	0.015851	0.103873	Down
lnc-MSTRG.12991.1	0.001	0.843333	9.71996	0.0159542	0.104359	Up
lnc-MSTRG.4369.1	2.16	0.926667	-1.22091	0.0160017	0.104478	Down
lnc-MSTRG.11402.2	0.34	1.23	1.85505	0.0160764	0.104775	Up
lnc-MSTRG.5757.2	0.3	1.53333	2.35364	0.0161328	0.104951	Up
lnc-MSTRG.34611.1	41.9367	13.5767	-1.62708	0.0163819	0.106378	Down
lnc-MSTRG.23561.1	0.0666667	1.31667	4.30378	0.0164824	0.10646	Up
lnc-MSTRG.30375.1	0.153333	1.53333	3.32193	0.016506	0.10646	Up
lnc-MSTRG.14161.2	2.16333	0.26	-3.05667	0.016515	0.10646	Down
lnc-MSTRG.20867.4	0.0266667	0.486667	4.18982	0.0166045	0.10646	Up
lnc-MSTRG.2897.1	0.12	1.44	3.58496	0.0166264	0.10646	Up
lnc-MSTRG.22673.1	0.543333	2.04	1.90866	0.0166275	0.10646	Up
lnc-MSTRG.768.1	0.0566667	0.976667	4.10729	0.016629	0.10646	Up
lnc-MSTRG.9249.1	1.48667	0.433333	-1.77853	0.0166433	0.10646	Down
lnc-MSTRG.32256.9	0.001	0.84	9.71425	0.0166623	0.10646	Up
lnc-MSTRG.12746.1	0.74	3.37667	2.19	0.0168765	0.107636	Up
lnc-MSTRG.21090.2	3.4	0.893333	-1.92826	0.01697	0.10804	Down
lnc-MSTRG.24324.2	0.03	0.433333	3.85244	0.0173327	0.110154	Up
lnc-MSTRG.5388.2	0.001	0.343333	8.42347	0.0175615	0.111191	Up
lnc-MSTRG.6316.2	1.84333	4.24667	1.20401	0.0175847	0.111191	Up
lnc-MSTRG.18414.1	0.943333	0.07	-3.75234	0.0175891	0.111191	Down
lnc-MSTRG.12830.3	0.423333	2.73667	2.69255	0.0176485	0.111369	Up
lnc-MSTRG.30062.1	1.71333	0.833333	-1.03984	0.0181858	0.114558	Down
lnc-MSTRG.13616.1	4.74	1.03333	-2.19758	0.0184107	0.11577	Down
lnc-MSTRG.32133.1	4.81	1.54333	-1.63999	0.0187187	0.117501	Down
lnc-MSTRG.11261.1	0.406667	1.38667	1.7697	0.0189819	0.118944	Up
lnc-MSTRG.21942.4	1.39	0.373333	-1.89655	0.0190477	0.119148	Down
lnc-MSTRG.14836.1	5.59667	2.71667	-1.04273	0.0192194	0.119878	Down
lnc-MSTRG.15341.1	0.94	0.06	-3.96963	0.0192314	0.119878	Down
lnc-MSTRG.21421.1	2.28	5.13	1.16993	0.0193328	0.1203	Up
lnc-MSTRG.32135.1	4.26667	1.63333	-1.38529	0.0193951	0.120479	Down
lnc-MSTRG.9283.1	0.001	0.866667	9.75933	0.0195507	0.121234	Up
lnc-MSTRG.420.1	0.766667	0.001	-9.58246	0.0197102	0.122012	Down
lnc-MSTRG.23844.1	2.13667	4.45333	1.05952	0.0198133	0.122438	Up
lnc-MSTRG.28993.1	0.08	1.20667	3.91488	0.020019	0.12347	Up
lnc-MSTRG.6946.4	1.27	5.63667	2.15001	0.0200491	0.12347	Up
lnc-MSTRG.33730.1	1.02333	0.23	-2.15357	0.0201131	0.12365	Down
lnc-MSTRG.16969.1	0.0233333	0.646667	4.79256	0.0201841	0.123875	Up
lnc-MSTRG.21338.1	0.206667	1.11	2.42518	0.0203918	0.124935	Up
lnc-MSTRG.3403.1	0.001	0.273333	8.09452	0.0204515	0.125086	Up
lnc-MSTRG.3393.3	0.446667	1.22	1.44961	0.0205024	0.125183	Up
lnc-MSTRG.21957.1	0.4	0.0333333	-3.58496	0.0205877	0.12549	Down
lnc-MSTRG.12634.6	0.0633333	0.643333	3.34453	0.0207853	0.126346	Up
lnc-MSTRG.11753.1	0.473333	1.49	1.65438	0.0208942	0.126346	Up
lnc-MSTRG.23591.1	0.001	0.986667	9.94642	0.0209417	0.126346	Up
lnc-MSTRG.2641.1	0.05	0.8	4	0.0209428	0.126346	Up
lnc-MSTRG.7208.3	1.35	3.01333	1.1584	0.0209621	0.126346	Up
lnc-MSTRG.15736.1	0.001	0.743333	9.53787	0.0209653	0.126346	Up
lnc-MSTRG.1578.1	0.446667	1.19	1.41369	0.0209753	0.126346	Up
lnc-MSTRG.21339.1	0.43	2.16667	2.33307	0.021171	0.12731	Up
lnc-MSTRG.15963.1	32.4433	75.06	1.21012	0.0212401	0.127512	Up
lnc-MSTRG.25174.1	0.001	0.62	9.27612	0.0214651	0.128647	Up
lnc-MSTRG.6384.2	1.95333	0.39	-2.32439	0.0217605	0.130199	Down
lnc-MSTRG.20994.1	0.76	0.001	-9.56986	0.0218255	0.13037	Down
lnc-MSTRG.8163.1	1.82	0.383333	-2.24727	0.0224522	0.13389	Down
lnc-MSTRG.21895.4	0.0433333	0.506667	3.54749	0.0225196	0.13391	Up
lnc-MSTRG.24414.1	0.536667	2.45333	2.19265	0.0225327	0.13391	Up
lnc-MSTRG.5332.1	0.733333	0.123333	-2.57191	0.0225786	0.13391	Down
lnc-MSTRG.4951.3	5.34333	12.01	1.16842	0.0226212	0.13391	Up
lnc-MSTRG.20519.2	2.11667	5.41333	1.35472	0.0226428	0.13391	Up
lnc-MSTRG.12673.1	0.03	0.416667	3.79586	0.0227107	0.134091	Up
lnc-MSTRG.24427.1	1.94	5.11667	1.39915	0.0227744	0.134199	Up
lnc-MSTRG.22226.1	0.566667	0.001	-9.14636	0.022804	0.134199	Down
lnc-MSTRG.24324.1	0.216667	0.813333	1.90837	0.0228436	0.134211	Up
lnc-MSTRG.12336.1	0.0166667	0.556667	5.06178	0.0233139	0.13675	Up
lnc-MSTRG.11586.1	0.753333	0.001	-9.55714	0.0233855	0.136945	Down
lnc-MSTRG.1619.2	2.67667	1.09333	-1.2917	0.0234699	0.137215	Down
lnc-MSTRG.13417.1	1.42333	5.5	1.95016	0.0236233	0.137886	Up
lnc-MSTRG.25788.1	0.001	0.47	8.87652	0.0239246	0.139417	Up
lnc-MSTRG.22770.2	0.693333	0.03	-4.53051	0.0242028	0.140809	Down
lnc-MSTRG.28374.1	6.16	3.57	-0.787006	0.0247818	0.143944	No
lnc-MSTRG.16742.1	5.08667	1.25333	-2.02095	0.0248961	0.144373	Down
lnc-MSTRG.11956.3	0.48	1.43333	1.57827	0.0250772	0.145188	Up
lnc-MSTRG.26239.4	0.84	0.276667	-1.60224	0.0251732	0.145509	Down
lnc-MSTRG.28208.1	2.1	0.256667	-3.03242	0.0252158	0.145519	Down
lnc-MSTRG.71.1	0.001	0.673333	9.39518	0.0252848	0.145683	Up
lnc-MSTRG.34523.1	1.19333	0.173333	-2.78338	0.025465	0.146485	Down
lnc-MSTRG.2465.1	1.07333	0.173333	-2.63048	0.0255987	0.147018	Down
lnc-MSTRG.8626.1	1.64667	0.533333	-1.62644	0.0257605	0.14771	Down
lnc-MSTRG.8268.1	0.02	0.46	4.52356	0.0258617	0.148053	Up
lnc-MSTRG.31244.1	0.01	0.193333	4.27302	0.0259669	0.148418	Up
lnc-MSTRG.28414.1	12.7467	26.72	1.0678	0.0260117	0.148437	Up
lnc-MSTRG.23660.1	0.26	1.20667	2.21444	0.0260718	0.148504	Up
lnc-MSTRG.12381.2	4.55667	1.96667	-1.21223	0.0261112	0.148504	Down
lnc-MSTRG.33576.3	1.67333	5.10667	1.60966	0.026148	0.148504	Up
lnc-MSTRG.17983.1	57.0333	23.9367	-1.25258	0.026217	0.14866	Down
lnc-MSTRG.28840.2	0.31	1.38667	2.16128	0.0264726	0.149872	Up
lnc-MSTRG.4480.1	5.12	16.63	1.69957	0.026549	0.150067	Up
lnc-MSTRG.6584.1	4.17667	11.1867	1.42136	0.026656	0.150402	Up
lnc-MSTRG.7395.2	1.86	6.45	1.794	0.0266924	0.150402	Up
lnc-MSTRG.22722.1	2.04667	0.74	-1.46768	0.0268371	0.15083	Down
lnc-MSTRG.14310.1	3.97667	1.66667	-1.25459	0.0268526	0.15083	Down
lnc-MSTRG.2968.1	1.58333	0.52	-1.60638	0.027127	0.152132	Down
lnc-MSTRG.11820.1	27.9133	64.5367	1.20916	0.0272951	0.152836	Up
lnc-MSTRG.13331.1	3.76	2.21667	-0.762341	0.0275697	0.154119	No
lnc-MSTRG.10011.1	0.37	0.02	-4.20945	0.0276105	0.154119	Down
lnc-MSTRG.17827.1	2.32	5.75	1.30944	0.0276556	0.15413	Up
lnc-MSTRG.12563.1	4.31	2.37667	-0.858748	0.0279212	0.155369	No
lnc-MSTRG.19077.3	0.0333333	0.266667	3	0.0281251	0.15626	Up
lnc-MSTRG.24927.1	20.7267	9.98667	-1.05341	0.0282087	0.156482	Down
lnc-MSTRG.32108.1	2.3	0.433333	-2.40808	0.0282953	0.156719	Down
lnc-MSTRG.18076.1	0.166667	1.36333	3.0321	0.0284391	0.157272	Up
lnc-MSTRG.29217.1	5.14	10.7033	1.05822	0.0286813	0.158367	Up
lnc-MSTRG.28165.1	1.96667	0.916667	-1.10128	0.0287585	0.158548	Down
lnc-MSTRG.22913.1	1.26333	0.593333	-1.09032	0.028941	0.159119	Down
lnc-MSTRG.31899.1	2.17333	0.856667	-1.3431	0.0289697	0.159119	Down
lnc-MSTRG.5595.1	0.206667	0.91	2.13856	0.0289954	0.159119	Up
lnc-MSTRG.28008.2	0.213333	1.1	2.36632	0.029242	0.160087	Up
lnc-MSTRG.118.2	2.71	5.73667	1.08192	0.0292613	0.160087	Up
lnc-MSTRG.56.2	21.19	60.6433	1.51697	0.029402	0.160611	Up
lnc-MSTRG.2321.1	4.33333	2.23333	-0.956279	0.0295837	0.161357	No
lnc-MSTRG.9140.2	2.11333	0.63	-1.7461	0.029972	0.163226	Down
lnc-MSTRG.9721.1	1.29	0.333333	-1.95233	0.0300549	0.163429	Down
lnc-MSTRG.9683.1	0.256667	1.38	2.4267	0.0301378	0.163631	Up
lnc-MSTRG.810.1	0.573333	0.0233333	-4.61891	0.0302724	0.164113	Down
lnc-MSTRG.19603.1	0.453333	0.001	-8.82443	0.0304157	0.164641	Down
lnc-MSTRG.14074.1	2.74667	1.11667	-1.29848	0.030561	0.165177	Down
lnc-MSTRG.33796.1	0.001	1.04667	10.0316	0.0306504	0.165411	Up
lnc-MSTRG.21544.1	0.143333	0.81	2.49855	0.0309806	0.166905	Up
lnc-MSTRG.27330.1	0.923333	0.416667	-1.14796	0.0310207	0.166905	Down
lnc-MSTRG.33959.1	0.0333333	0.64	4.26303	0.0310834	0.166991	Up
lnc-MSTRG.25973.1	3.44667	7.22667	1.06813	0.0313946	0.168411	Up
lnc-MSTRG.18464.1	0.0966667	0.543333	2.49075	0.0315682	0.169088	Up
lnc-MSTRG.24067.1	0.833333	2.17333	1.38294	0.0317021	0.169552	Up
lnc-MSTRG.1357.2	1.9	0.596667	-1.671	0.0319647	0.17058	Down
lnc-MSTRG.22515.1	0.88	2.25667	1.35862	0.0320099	0.17058	Up
lnc-MSTRG.6584.2	1.63667	5.60333	1.77552	0.0320374	0.17058	Up
lnc-MSTRG.6485.1	1.12333	2.79333	1.3142	0.0321461	0.170905	Up
lnc-MSTRG.10769.1	2.45333	0.703333	-1.80246	0.0323048	0.171493	Down
lnc-MSTRG.12436.2	1.29333	3.10333	1.26272	0.032673	0.173191	Up
lnc-MSTRG.22753.1	2.7	1.1	-1.29546	0.0328589	0.173834	Down
lnc-MSTRG.5707.3	1.29333	0.363333	-1.83173	0.0328915	0.173834	Down
lnc-MSTRG.24988.1	0.836667	0.293333	-1.51211	0.0330853	0.174516	Down
lnc-MSTRG.15526.1	0.133333	0.646667	2.27798	0.0331181	0.174516	Up
lnc-MSTRG.20695.3	0.416667	1.55333	1.8984	0.0332376	0.17467	Up
lnc-MSTRG.3444.1	0.19	1.16	2.61005	0.0332449	0.17467	Up
lnc-MSTRG.16852.1	0.323333	1.24333	1.94312	0.03331	0.174756	Up
lnc-MSTRG.28129.1	0.946667	0.196667	-2.2671	0.0334829	0.175406	Down
lnc-MSTRG.31873.1	0.08	1.22	3.93074	0.0335812	0.175663	Up
lnc-MSTRG.22582.1	0.756667	0.0266667	-4.82655	0.0337452	0.176263	Down
lnc-MSTRG.19331.1	1.79667	5.41	1.59031	0.0340436	0.177205	Up
lnc-MSTRG.8878.1	0.986667	0.113333	-3.12199	0.0340612	0.177205	Down
lnc-MSTRG.15659.1	0.27	0.001	-8.07682	0.0340741	0.177205	Down
lnc-MSTRG.16035.1	25.2267	54.0967	1.10059	0.0344676	0.178991	Up
lnc-MSTRG.29028.1	0.733333	2.03667	1.47367	0.0345668	0.179246	Up
lnc-MSTRG.18214.1	2.68333	7.29	1.44189	0.0346394	0.179363	Up
lnc-MSTRG.26617.1	1.36667	0.123333	-3.47003	0.0348086	0.179665	Down
lnc-MSTRG.13661.1	0.001	1.04667	10.0316	0.0348651	0.179665	Up
lnc-MSTRG.24182.1	0.0133333	0.23	4.10852	0.0348867	0.179665	Up
lnc-MSTRG.9149.1	0.16	0.97	2.59991	0.0349514	0.179665	Up
lnc-MSTRG.11771.1	0.156667	0.536667	1.77633	0.0349852	0.179665	Up
lnc-MSTRG.7141.2	0.186667	0.001	-7.54432	0.034999	0.179665	Down
lnc-MSTRG.31874.1	0.54	2.49333	2.20704	0.0352505	0.180697	Up
lnc-MSTRG.17709.1	0.001	1.05667	10.0453	0.0353476	0.180935	Up
lnc-MSTRG.19607.2	0.0833333	0.001	-6.38082	0.0356248	0.182094	Down
lnc-MSTRG.15604.1	0.001	1.16333	10.184	0.0358384	0.182924	Up
lnc-MSTRG.3458.1	0.41	1.46667	1.83885	0.0363555	0.185094	Up
lnc-MSTRG.14233.1	0.893333	0.13	-2.78069	0.0363669	0.185094	Down
lnc-MSTRG.21539.1	1.81333	0.463333	-1.96852	0.036473	0.18537	Down
lnc-MSTRG.25457.1	4.1	0.57	-2.84659	0.0365899	0.1857	Down
lnc-MSTRG.9071.4	0.666667	0.203333	-1.71312	0.0366458	0.185721	Down
lnc-MSTRG.34098.4	4.27	8.90667	1.06065	0.0370567	0.187464	Up
lnc-MSTRG.10685.1	0.696667	0.001	-9.44432	0.0370946	0.187464	Down
lnc-MSTRG.11659.2	0.893333	0.283333	-1.6567	0.0371581	0.18752	Down
lnc-MSTRG.14714.1	0.001	0.753333	9.55714	0.0373233	0.187774	Up
lnc-MSTRG.28605.1	1.36333	0.39	-1.80559	0.037387	0.187774	Down
lnc-MSTRG.30044.1	0.716667	0.23	-1.63967	0.0373959	0.187774	Down
lnc-MSTRG.14.3	0.156667	2.68333	4.09826	0.0374183	0.187774	Up
lnc-MSTRG.17871.1	0.97	0.24	-2.01495	0.0376292	0.188568	Down
lnc-MSTRG.2559.1	0.456667	0.0233333	-4.29068	0.0377989	0.189153	Down
lnc-MSTRG.8827.3	1.18333	4.88667	2.04599	0.0378523	0.189156	Up
lnc-MSTRG.10281.1	1.04333	0.07	-3.8977	0.0379973	0.189615	Down
lnc-MSTRG.5969.1	4.38	0.783333	-2.48323	0.0381009	0.189868	Down
lnc-MSTRG.24961.1	77.4	28.1633	-1.45852	0.0382599	0.190395	Down
lnc-MSTRG.28332.1	0.8	0.001	-9.64386	0.0385038	0.191342	Down
lnc-MSTRG.16873.1	0.453333	0.0833333	-2.44361	0.0388293	0.192692	Down
lnc-MSTRG.21304.1	4.14	9.54333	1.20486	0.0389579	0.192836	Up
lnc-MSTRG.617.2	4.82667	1.17333	-2.04041	0.0389859	0.192836	Down
lnc-MSTRG.3704.1	0.276667	1.55	2.48605	0.0390199	0.192836	Up
lnc-MSTRG.25567.1	0.716667	0.0466667	-3.94084	0.0393972	0.194432	Down
lnc-MSTRG.11964.1	0.666667	3.26	2.28983	0.0396628	0.195473	Up
lnc-MSTRG.33370.2	0.73	0.26	-1.48938	0.040041	0.197066	Down
lnc-MSTRG.5933.1	0.783333	0.03	-4.70659	0.0401735	0.197446	Down
lnc-MSTRG.19594.1	18.9333	7.21333	-1.39219	0.0405558	0.199052	Down
lnc-MSTRG.3186.1	3.06333	10.1533	1.72878	0.0411098	0.201494	Up
lnc-MSTRG.24105.1	1.27667	0.31	-2.04204	0.0414974	0.203116	Down
lnc-MSTRG.29599.1	0.86	0.15	-2.51937	0.0416143	0.20341	Down
lnc-MSTRG.15424.1	1.44333	0.263333	-2.45444	0.0416715	0.203411	Down
lnc-MSTRG.12462.1	0.833333	0.256667	-1.699	0.0417332	0.203435	Down
lnc-MSTRG.11404.1	0.683333	0.0466667	-3.87213	0.0418989	0.203965	Down
lnc-MSTRG.34504.1	0.91	0.0366667	-4.63333	0.042009	0.204223	Down
lnc-MSTRG.8630.1	0.136667	1.13	3.04759	0.0424207	0.205372	Up
lnc-MSTRG.21301.1	0.001	0.74	9.53138	0.0424301	0.205372	Up
lnc-MSTRG.23326.1	1.06667	0.001	-10.0589	0.042472	0.205372	Down
lnc-MSTRG.4497.1	0.24	1.13667	2.2437	0.042486	0.205372	Up
lnc-MSTRG.20492.1	0.83	0.001	-9.69697	0.0425323	0.205372	Down
lnc-MSTRG.26282.1	6.93333	3.70333	-0.904725	0.042648	0.205653	No
lnc-MSTRG.8396.1	0.0866667	0.001	-6.43741	0.0427121	0.205685	Down
lnc-MSTRG.18813.3	0.43	0.03	-3.8413	0.0428827	0.206129	Down
lnc-MSTRG.4422.1	0.613333	0.0866667	-2.82312	0.0430173	0.206129	Down
lnc-MSTRG.6929.1	0.05	0.41	3.03562	0.0430297	0.206129	Up
lnc-MSTRG.22502.1	0.7	2.36	1.75336	0.0430348	0.206129	Up
lnc-MSTRG.8868.1	1.19333	0.393333	-1.60117	0.0432797	0.207025	Down
lnc-MSTRG.25380.2	0.001	0.71	9.47168	0.0434828	0.207719	Up
lnc-MSTRG.779.1	0.446667	0.0133333	-5.06609	0.0439397	0.209622	Down
lnc-MSTRG.32061.1	0.913333	0.0933333	-3.29068	0.0440776	0.209916	Down
lnc-MSTRG.30019.1	6.23667	1.60333	-1.9597	0.0441188	0.209916	Down
lnc-MSTRG.32379.1	0.8	0.17	-2.23447	0.0443134	0.210191	Down
lnc-MSTRG.10118.1	1.09	3.15333	1.53255	0.0443789	0.210191	Up
lnc-MSTRG.15373.5	0.783333	0.196667	-1.99387	0.0444026	0.210191	Down
lnc-MSTRG.28371.1	19.1	6.06333	-1.65539	0.0444731	0.210191	Down
lnc-MSTRG.11558.1	2.87333	1.35667	-1.08266	0.0445102	0.210191	Down
lnc-MSTRG.9005.1	1.36667	0.353333	-1.95156	0.0445636	0.210191	Down
lnc-MSTRG.7235.1	0.433333	1.42333	1.71572	0.0446196	0.210191	Up
lnc-MSTRG.24951.1	0.19	1.92	3.33703	0.0446465	0.210191	Up
lnc-MSTRG.25009.1	0.001	0.696667	9.44432	0.0447396	0.210268	Up
lnc-MSTRG.5405.1	0.12	1.00333	3.06369	0.0448022	0.210268	Up
lnc-MSTRG.3761.1	3.31	1.59667	-1.05177	0.0448391	0.210268	Down
lnc-MSTRG.14644.1	1.54333	5.51	1.836	0.0449803	0.210597	Up
lnc-MSTRG.33338.1	0.176667	0.943333	2.41674	0.045027	0.210597	Up
lnc-MSTRG.25656.1	0.363333	2.79333	2.94262	0.045186	0.211065	Up
lnc-MSTRG.25819.1	0.25	0.0166667	-3.90689	0.0455185	0.212341	Down
lnc-MSTRG.32013.1	55.3867	32.9367	-0.749844	0.0455862	0.212379	No
lnc-MSTRG.17784.1	1.54333	0.196667	-2.97223	0.0457695	0.212956	Down
lnc-MSTRG.18105.1	1.42	3.45333	1.2821	0.0460531	0.213997	Up
lnc-MSTRG.28535.1	9.32667	3.18	-1.55233	0.0462112	0.214454	Down
lnc-MSTRG.18080.1	9.97333	20.3067	1.02581	0.0472176	0.21884	Up
lnc-MSTRG.16059.2	1.66	0.613333	-1.43644	0.0473683	0.219255	Down
lnc-MSTRG.19160.7	0.85	2.43	1.51542	0.0476619	0.220329	Up
lnc-MSTRG.26934.2	0.973333	2.42333	1.31599	0.0478057	0.220708	Up
lnc-MSTRG.21671.2	0.0166667	0.32	4.26303	0.0480188	0.221406	Up
lnc-MSTRG.4950.1	0.836667	0.28	-1.57923	0.0484365	0.223045	Down
lnc-MSTRG.27023.1	8.63	19.59	1.18268	0.0485457	0.22326	Up
lnc-MSTRG.32646.1	0.0333333	0.69	4.37156	0.0486999	0.223682	Up
lnc-MSTRG.4768.1	1.32333	3.51333	1.40866	0.0492493	0.225916	Up
lnc-MSTRG.18136.1	0.613333	0.001	-9.26053	0.0493303	0.225997	Down
lnc-MSTRG.20579.1	0.0966667	0.773333	3	0.0496323	0.22687	Up
lnc-MSTRG.9509.1	2.80667	1.10667	-1.34264	0.0496924	0.22687	Down
lnc-MSTRG.21704.2	1.00667	2.56	1.34656	0.049711	0.22687	Up
lnc-MSTRG.3108.1	0.973333	0.113333	-3.10236	0.0499033	0.227457	Down
lnc-MSTRG.15874.1	5.61333	2.87	-0.967807	0.0499831	0.227531	No
lnc-MSTRG.28267.1	0.796667	0.163333	-2.28616	0.0501603	0.227779	Down
lnc-MSTRG.31733.1	0.533333	1.28	1.26303	0.0501648	0.227779	Up
lnc-MSTRG.22743.2	0.94	0.396667	-1.24473	0.0502473	0.227864	Down
lnc-MSTRG.1469.1	1.06	0.226667	-2.22542	0.050552	0.228956	Down
lnc-MSTRG.24692.3	37.6167	27.8467	-0.433867	0.0506689	0.229195	No
lnc-MSTRG.16992.3	0.706667	0.106667	-2.72792	0.0510965	0.230838	Down
lnc-MSTRG.23396.2	40.7	19.78	-1.04099	0.0512575	0.231273	Down
lnc-MSTRG.28679.1	2.37333	5.88333	1.30972	0.0518241	0.233535	Up
lnc-MSTRG.5806.1	0.49	0.0333333	-3.87774	0.0519017	0.23359	Down
lnc-MSTRG.27037.1	1.57333	4.32333	1.45832	0.0519899	0.233693	Up
lnc-MSTRG.28808.1	0.383333	1.10333	1.5252	0.0521569	0.233864	Up
lnc-MSTRG.29753.1	0.293333	1.26667	2.11042	0.0521586	0.233864	Up
lnc-MSTRG.28876.1	0.001	0.76	9.56986	0.0524018	0.234414	Up
lnc-MSTRG.23027.1	1.12667	0.236667	-2.25113	0.0524124	0.234414	Down
lnc-MSTRG.6577.1	0.11	0.776667	2.81979	0.0527249	0.235518	Up
lnc-MSTRG.20360.1	1.00667	0.183333	-2.45705	0.0529658	0.236299	Down
lnc-MSTRG.23076.1	2.43	0.883333	-1.45993	0.0531551	0.236384	Down
lnc-MSTRG.33752.1	0.866667	0.123333	-2.81291	0.0532312	0.236384	Down
lnc-MSTRG.26441.1	0.166667	0.876667	2.39506	0.0532458	0.236384	Up
lnc-MSTRG.21476.1	1.41	4.83667	1.77832	0.0532493	0.236384	Up
lnc-MSTRG.6420.1	0.001	0.28	8.12928	0.0533312	0.236455	Up
lnc-MSTRG.19064.1	1.73333	0.413333	-2.06817	0.0536626	0.23763	Down
lnc-MSTRG.10769.2	1.50667	0.626667	-1.26559	0.0539402	0.238163	Down
lnc-MSTRG.22090.1	0.833333	2.6	1.64155	0.0540805	0.238163	Up
lnc-MSTRG.13508.1	4.39	2.14	-1.03661	0.0540925	0.238163	Down
lnc-MSTRG.22827.1	4.20333	9.88333	1.23346	0.0540993	0.238163	Up
lnc-MSTRG.7415.1	2.30667	1.3	-0.827298	0.0541463	0.238163	No
lnc-MSTRG.26474.2	3.55667	0.726667	-2.29116	0.0541824	0.238163	Down
lnc-MSTRG.24911.2	0.38	1.54333	2.02198	0.0543761	0.238721	Up
lnc-MSTRG.26239.1	0.246667	0.81	1.71536	0.0547716	0.240163	Up
lnc-MSTRG.31695.1	0.296667	0.0333333	-3.15381	0.0553982	0.242393	Down
lnc-MSTRG.29123.1	0.03	0.576667	4.2647	0.0554157	0.242393	Up
lnc-MSTRG.18442.1	0.313333	1.66333	2.40831	0.0556952	0.243318	Up
lnc-MSTRG.11126.1	0.0233333	0.22	3.23704	0.0558187	0.24356	Up
lnc-MSTRG.32041.1	1.22667	0.38	-1.69067	0.0562435	0.244573	Down
lnc-MSTRG.1025.1	0.92	2.94	1.67611	0.0562474	0.244573	Up
lnc-MSTRG.23738.1	0.001	0.583333	9.18818	0.0562558	0.244573	Up
lnc-MSTRG.844.2	1.43333	2.93333	1.03317	0.0569183	0.247153	Up
lnc-MSTRG.14161.3	3.22667	1.19	-1.43908	0.0571396	0.247813	Down
lnc-MSTRG.26474.1	1.16333	0.15	-2.95523	0.0577214	0.249856	Down
lnc-MSTRG.21606.2	3.16	1.48333	-1.09108	0.0577504	0.249856	Down
lnc-MSTRG.7328.1	0.88	2.50667	1.51019	0.0578276	0.249888	Up
lnc-MSTRG.20632.1	0.11	2.41333	4.45545	0.0581762	0.251091	Up
lnc-MSTRG.30471.1	4.55667	2.14667	-1.08588	0.0590933	0.254705	Down
lnc-MSTRG.28727.1	0.97	0.356667	-1.44341	0.0591575	0.254705	Down
lnc-MSTRG.21090.1	5.23333	2.93333	-0.835189	0.059227	0.254705	No
lnc-MSTRG.3192.1	0.0766667	0.83	3.43644	0.0595774	0.255904	Up
lnc-MSTRG.4036.1	5.77667	1.43	-2.01422	0.0599932	0.257381	Down
lnc-MSTRG.23521.1	1.30333	0.353333	-1.8831	0.0607392	0.260269	Down
lnc-MSTRG.7033.1	1.31333	0.44	-1.57766	0.0613489	0.262567	Down
lnc-MSTRG.1701.2	1.47667	0.713333	-1.0497	0.0617485	0.263962	Down
lnc-MSTRG.29706.1	0.736667	0.1	-2.88101	0.0620016	0.264551	Down
lnc-MSTRG.33662.1	0.836667	0.0566667	-3.88408	0.0620341	0.264551	Down
lnc-MSTRG.26820.1	0.226667	1.61333	2.8314	0.0621504	0.264731	Up
lnc-MSTRG.27899.5	4.37	3.02667	-0.529903	0.0622515	0.264847	No
lnc-MSTRG.3105.1	0.733333	0.166667	-2.1375	0.0624429	0.265345	Down
lnc-MSTRG.615.1	1.38	0.586667	-1.23406	0.0628367	0.266702	Down
lnc-MSTRG.6638.1	2.79333	1.31	-1.09242	0.062954	0.266883	Down
lnc-MSTRG.2051.1	1.12	6.09667	2.44452	0.063107	0.266956	Up
lnc-MSTRG.17627.1	0.353333	0.001	-8.46489	0.0631204	0.266956	Down
lnc-MSTRG.9288.1	0.946667	0.001	-9.88671	0.0634057	0.267496	Down
lnc-MSTRG.17994.2	0.001	0.136667	7.09452	0.0634195	0.267496	Up
lnc-MSTRG.26475.1	1.61667	4.77333	1.56197	0.0634724	0.267496	Up
lnc-MSTRG.26059.2	0.29	0.896667	1.62852	0.0636805	0.268058	Up
lnc-MSTRG.26868.1	0.03	0.63	4.39232	0.0640564	0.269323	Up
lnc-MSTRG.30376.1	1.07333	3.20667	1.57898	0.0641597	0.269441	Up
lnc-MSTRG.639.1	1.67667	0.383333	-2.12892	0.0642993	0.26971	Down
lnc-MSTRG.23382.1	1.83	1.15	-0.67021	0.0647469	0.270978	No
lnc-MSTRG.5416.2	1.57667	3.28667	1.05975	0.0647531	0.270978	Up
lnc-MSTRG.19812.1	3.14	1.27	-1.30594	0.0651712	0.272226	Down
lnc-MSTRG.24444.3	0.636667	1.95333	1.61733	0.0652034	0.272226	Up
lnc-MSTRG.11778.1	0.65	0.153333	-2.08377	0.0655204	0.273231	Down
lnc-MSTRG.25316.1	6.04	2.02333	-1.57781	0.0658349	0.273992	Down
lnc-MSTRG.31787.1	7.96	16.3767	1.0408	0.065856	0.273992	Up
lnc-MSTRG.1519.4	0.17	0.001	-7.40939	0.0661517	0.274902	Down
lnc-MSTRG.9396.1	15.4333	30.56	0.985595	0.0663001	0.275199	No
lnc-MSTRG.34159.1	1.06667	2.28	1.09592	0.0663952	0.275275	Up
lnc-MSTRG.13792.1	0.106667	1.2	3.49185	0.0668655	0.276903	Up
lnc-MSTRG.26474.3	0.623333	0.136667	-2.18934	0.0671547	0.27778	Down
lnc-MSTRG.27107.2	0.42	1.3	1.63005	0.0674322	0.278605	Up
lnc-MSTRG.7438.2	0.163333	0.833333	2.35107	0.0676586	0.279219	Up
lnc-MSTRG.8952.1	1.27667	4.2	1.71801	0.0679103	0.279935	Up
lnc-MSTRG.24564.1	2.35	0.94	-1.32193	0.0684214	0.281717	Down
lnc-MSTRG.26577.1	1.13667	0.0566667	-4.32617	0.0687747	0.282567	Down
lnc-MSTRG.7385.2	12.8267	8	-0.681074	0.0687858	0.282567	No
lnc-MSTRG.8125.3	1.31667	2.85667	1.11744	0.0688857	0.282653	Up
lnc-MSTRG.17429.2	0.686667	2.03333	1.56616	0.0690369	0.282948	Up
lnc-MSTRG.27762.1	0.293333	0.93	1.66469	0.0694123	0.283847	Up
lnc-MSTRG.8519.1	1.35	0.416667	-1.69599	0.0694147	0.283847	Down
lnc-MSTRG.3032.1	0.001	0.663333	9.37359	0.0696234	0.28404	Up
lnc-MSTRG.7248.2	0.001	0.123333	6.94642	0.0696585	0.28404	Up
lnc-MSTRG.18677.1	4.19	2.70333	-0.632211	0.0697665	0.28404	No
lnc-MSTRG.14604.1	0.001	0.753333	9.55714	0.0697796	0.28404	Up
lnc-MSTRG.12097.1	0.67	0.1	-2.74416	0.0700088	0.284649	Down
lnc-MSTRG.15602.2	3.21333	6.39667	0.99325	0.0701916	0.284891	No
lnc-MSTRG.27726.3	1.08667	2.39667	1.14112	0.0702628	0.284891	Up
lnc-MSTRG.4949.2	1.12333	0.556667	-1.0129	0.0703071	0.284891	Down
lnc-MSTRG.15917.1	6.76	3.67667	-0.878625	0.07069	0.285947	No
lnc-MSTRG.28293.1	4.19333	9.21667	1.13615	0.0708826	0.285947	Up
lnc-MSTRG.16896.5	0.0633333	1.01667	4.00474	0.070935	0.285947	Up
lnc-MSTRG.15984.1	3.77667	1.38667	-1.44549	0.0709535	0.285947	Down
lnc-MSTRG.16781.1	1.12333	0.373333	-1.58925	0.0710364	0.285947	Down
lnc-MSTRG.23983.5	1.91	1.19	-0.682611	0.0710472	0.285947	No
lnc-MSTRG.23503.1	0.676667	1.82	1.42742	0.071236	0.286385	Up
lnc-MSTRG.9476.1	1.32	0.406667	-1.69862	0.0713499	0.286521	Down
lnc-MSTRG.26795.1	0.26	1.04	2	0.0714708	0.286684	Up
lnc-MSTRG.2825.1	0.06	0.413333	2.78427	0.0715576	0.286711	Up
lnc-MSTRG.17506.1	0.18	0.836667	2.21666	0.0719379	0.287912	Up
lnc-MSTRG.19742.1	1.38333	0.266667	-2.37504	0.0721552	0.288314	Down
lnc-MSTRG.28258.1	0.846667	0.216667	-1.96632	0.0721993	0.288314	Down
lnc-MSTRG.10922.2	6.9	4.04	-0.772241	0.0725523	0.289401	No
lnc-MSTRG.18153.1	1.95	0.963333	-1.01737	0.072655	0.289487	Down
lnc-MSTRG.25956.1	0.92	0.213333	-2.10852	0.072747	0.289532	Down
lnc-MSTRG.19182.1	0.76	2.52667	1.73316	0.0728365	0.289566	Up
lnc-MSTRG.25942.3	3.95667	7.59667	0.941081	0.0731796	0.290607	No
lnc-MSTRG.34081.2	2.44	0.99	-1.30138	0.0738319	0.292872	Down
lnc-MSTRG.17574.1	0.0366667	1.07	4.867	0.0755245	0.299254	Up
lnc-MSTRG.2493.1	0.823333	2.46667	1.58301	0.0756883	0.299364	Up
lnc-MSTRG.25672.1	0.08	1.08667	3.76377	0.0757196	0.299364	Up
lnc-MSTRG.9477.1	0.19	1.57333	3.04975	0.0760227	0.300231	Up
lnc-MSTRG.17750.3	0.453333	1.35333	1.57787	0.0767517	0.302776	Up
lnc-MSTRG.4816.2	1.86333	3.87333	1.05569	0.0768463	0.302815	Up
lnc-MSTRG.13438.1	0.413333	1.76333	2.09293	0.0771141	0.303536	Up
lnc-MSTRG.10821.1	0.77	0.14	-2.45943	0.0772451	0.303718	Down
lnc-MSTRG.28506.1	0.001	0.386667	8.59495	0.0776154	0.304839	Up
lnc-MSTRG.4507.1	4.30667	8.46667	0.975222	0.0777296	0.304952	No
lnc-MSTRG.29802.1	1.94	4.44333	1.19559	0.0778646	0.305133	Up
lnc-MSTRG.33950.4	2.59667	1.4	-0.891234	0.0779462	0.305133	No
lnc-MSTRG.19911.3	0.746667	2.65333	1.82927	0.0781574	0.305625	Up
lnc-MSTRG.4463.1	53.4867	21.2633	-1.33081	0.0783446	0.306023	Down
lnc-MSTRG.18109.1	0.001	0.48	8.90689	0.0786966	0.307063	Up
lnc-MSTRG.19807.1	0.453333	1.45	1.67741	0.0788429	0.307074	Up
lnc-MSTRG.10335.1	2.22333	0.986667	-1.17209	0.0788711	0.307074	Down
lnc-MSTRG.6551.4	1.51667	0.68	-1.1573	0.0793797	0.307895	Down
lnc-MSTRG.5441.1	0.001	0.626667	9.29155	0.0793941	0.307895	Up
lnc-MSTRG.22497.3	1.12667	4.28	1.92555	0.0794662	0.307895	Up
lnc-MSTRG.16815.2	8.23667	4.26	-0.951207	0.0795357	0.307895	No
lnc-MSTRG.12333.1	0.93	0.0433333	-4.42368	0.0795495	0.307895	Down
lnc-MSTRG.23865.1	0.333333	1.83333	2.45943	0.0795984	0.307895	Up
lnc-MSTRG.11239.1	0.001	0.61	9.25267	0.0803679	0.310513	Up
lnc-MSTRG.8629.1	0.001	0.98	9.93664	0.0804488	0.310513	Up
lnc-MSTRG.14168.1	0.66	0.0366667	-4.16993	0.0809174	0.311985	Down
lnc-MSTRG.16583.1	0.3	1.47333	2.29605	0.0811603	0.312585	Up
lnc-MSTRG.16804.4	1.2	0.41	-1.54934	0.0813909	0.313136	Down
lnc-MSTRG.5131.1	0.766667	0.233333	-1.71621	0.0820377	0.315286	Down
lnc-MSTRG.3629.1	0.943333	0.263333	-1.84088	0.0822521	0.31577	Down
lnc-MSTRG.20384.3	0.586667	1.82	1.63333	0.0827085	0.317182	Up
lnc-MSTRG.28365.1	0.783333	0.313333	-1.32193	0.0828185	0.317264	Down
lnc-MSTRG.28321.1	0.296667	1.27333	2.1017	0.0830832	0.317938	Up
lnc-MSTRG.6936.1	1.27333	2.53333	0.992427	0.0832377	0.317986	No
lnc-MSTRG.6541.3	3	1.83667	-0.707873	0.0832736	0.317986	No
lnc-MSTRG.26629.1	3.2	1.68333	-0.926751	0.0835045	0.318528	No
lnc-MSTRG.32980.1	1.66333	0.56	-1.57058	0.0841297	0.320452	Down
lnc-MSTRG.21907.1	0.723333	0.0866667	-3.06111	0.0841881	0.320452	Down
lnc-MSTRG.31175.1	0.001	0.613333	9.26053	0.0846714	0.320899	Up
lnc-MSTRG.6003.1	0.523333	1.15	1.13583	0.08468	0.320899	Up
lnc-MSTRG.6862.1	1.3	0.596667	-1.12351	0.0847291	0.320899	Down
lnc-MSTRG.10229.1	6.68667	4.08333	-0.71154	0.0848077	0.320899	No
lnc-MSTRG.14236.1	1.52667	0.59	-1.3716	0.0848109	0.320899	Down
lnc-MSTRG.18125.3	0.236667	1.35667	2.51914	0.0848436	0.320899	Up
lnc-MSTRG.2708.1	0.123333	1.86	3.91467	0.0852613	0.322138	Up
lnc-MSTRG.11956.4	0.16	0.001	-7.32193	0.0854981	0.322451	Down
lnc-MSTRG.26272.1	2.46	1.53667	-0.678854	0.0855242	0.322451	No
lnc-MSTRG.16018.1	0.963333	2.91	1.59491	0.0861004	0.32415	Up
lnc-MSTRG.17733.1	2.61333	1.81333	-0.527247	0.086156	0.32415	No
lnc-MSTRG.10178.1	2.59	0.89	-1.54107	0.0868138	0.326281	Down
lnc-MSTRG.1325.1	0.03	0.393333	3.71272	0.0870481	0.326818	Up
lnc-MSTRG.17743.1	0.873333	2.08	1.25198	0.0874755	0.328079	Up
lnc-MSTRG.27687.1	3.92667	1.95333	-1.00737	0.0876576	0.328418	Down
lnc-MSTRG.33994.1	1.28667	3.59	1.48035	0.0881229	0.329816	Up
lnc-MSTRG.22058.1	0.13	0.6	2.20645	0.0889783	0.332669	Up
lnc-MSTRG.10806.2	0.62	0.07	-3.14684	0.0892479	0.333329	Down
lnc-MSTRG.24695.1	0.0966667	0.61	2.65772	0.0902111	0.336575	Up
lnc-MSTRG.14337.1	0.001	0.606667	9.24476	0.0907007	0.338049	Up
lnc-MSTRG.21516.1	2.37667	0.853333	-1.47776	0.0909071	0.338466	Down
lnc-MSTRG.15516.1	0.723333	2.21667	1.61566	0.0910444	0.338624	Up
lnc-MSTRG.18478.1	0.656667	1.95	1.57024	0.0912142	0.338904	Up
lnc-MSTRG.21124.1	0.73	0.243333	-1.58496	0.0915178	0.339679	Down
lnc-MSTRG.10725.1	0.53	0.143333	-1.88662	0.092024	0.340945	Down
lnc-MSTRG.17004.1	15.2267	9.37333	-0.699966	0.0920573	0.340945	No
lnc-MSTRG.19198.1	0.66	1.48333	1.1683	0.0921447	0.340945	Up
lnc-MSTRG.563.1	1.45667	0.46	-1.66297	0.0925507	0.342093	Down
lnc-MSTRG.30554.1	5.14	11.9333	1.21516	0.0928599	0.342739	Up
lnc-MSTRG.25797.1	1.71667	5.29	1.62366	0.0929722	0.342739	Up
lnc-MSTRG.28558.1	0.29	1.71333	2.56268	0.0930369	0.342739	Up
lnc-MSTRG.16782.1	2.08667	0.97	-1.10514	0.0931084	0.342739	Down
lnc-MSTRG.902.1	0.336667	1.42667	2.08326	0.0936242	0.344283	Up
lnc-MSTRG.13335.1	0.896667	0.306667	-1.5479	0.0937539	0.344406	Down
lnc-MSTRG.26743.2	0.156667	1.18667	2.92114	0.0939353	0.344719	Up
lnc-MSTRG.12919.1	1.29	0.29	-2.15325	0.0941485	0.344892	Down
lnc-MSTRG.28697.1	0.0566667	0.546667	3.27009	0.0941755	0.344892	Up
lnc-MSTRG.8632.1	0.116667	0.753333	2.6909	0.0943073	0.345022	Up
lnc-MSTRG.4024.2	5.79333	3.76333	-0.622383	0.0944416	0.34516	No
lnc-MSTRG.1384.1	0.0766667	0.463333	2.59538	0.0948982	0.346475	Up
lnc-MSTRG.7248.1	0.0166667	0.11	2.72247	0.0953621	0.347814	Up
lnc-MSTRG.15750.1	1.55	0.213333	-2.86109	0.0960995	0.350146	Down
lnc-MSTRG.3449.1	0.0933333	0.573333	2.61891	0.096627	0.3514	Up
lnc-MSTRG.24452.1	0.52	0.001	-9.02237	0.0966398	0.3514	Down
lnc-MSTRG.29747.2	3.28333	1.96667	-0.739409	0.0971356	0.352092	No
lnc-MSTRG.15602.1	3.03	5.97667	0.980023	0.0972699	0.352092	No
lnc-MSTRG.3358.1	0.543333	0.186667	-1.54137	0.097435	0.352092	Down
lnc-MSTRG.28148.1	0.773333	0.173333	-2.15754	0.0974558	0.352092	Down
lnc-MSTRG.24177.1	1.02667	0.0966667	-3.40881	0.0976913	0.352092	Down
lnc-MSTRG.19203.1	0.001	0.293333	8.1964	0.0977531	0.352092	Up
lnc-MSTRG.33570.1	0.38	0.953333	1.32698	0.0977653	0.352092	Up
lnc-MSTRG.12412.1	0.536667	0.001	-9.06788	0.0978142	0.352092	Down
lnc-MSTRG.12799.1	0.643333	0.001	-9.32942	0.0978142	0.352092	Down
lnc-MSTRG.972.1	0.936667	0.001	-9.87139	0.0978142	0.352092	Down
lnc-MSTRG.942.1	13.8367	7.98667	-0.792831	0.0984798	0.35408	No
lnc-MSTRG.29772.1	5.31667	10.55	0.988649	0.0985645	0.35408	No
lnc-MSTRG.14032.4	3.07	1.43	-1.10222	0.0987269	0.354308	Down
lnc-MSTRG.34359.1	7.36333	4.97667	-0.565179	0.0997578	0.357267	No
lnc-MSTRG.4551.1	2.35333	1.21667	-0.951772	0.0997738	0.357267	No
lnc-MSTRG.34146.1	1.41667	2.89667	1.03189	0.099851	0.357267	Up
lnc-MSTRG.33946.1	0.88	0.0933333	-3.23704	0.100572	0.359486	Down
lnc-MSTRG.26740.1	0.0366667	0.326667	3.15528	0.100907	0.359734	Up
lnc-MSTRG.20412.1	1.11333	2.52667	1.18235	0.101027	0.359734	Up
lnc-MSTRG.20371.1	1.14333	0.166667	-2.77821	0.101036	0.359734	Down
lnc-MSTRG.23589.1	0.976667	0.001	-9.93172	0.101144	0.359734	Down
lnc-MSTRG.333.1	0.653333	0.001	-9.35168	0.101144	0.359734	Down
lnc-MSTRG.3403.2	0.001	0.366667	8.51833	0.101441	0.360431	Up
lnc-MSTRG.10876.2	0.536667	1.38	1.36257	0.101807	0.361375	Up
lnc-MSTRG.22157.1	7.03	3.55667	-0.982999	0.101979	0.361625	No
lnc-MSTRG.33971.1	0.206667	1.16	2.48875	0.102501	0.363118	Up
lnc-MSTRG.13883.1	0.303333	1.16667	1.94342	0.102611	0.363149	Up
lnc-MSTRG.32793.1	0.363333	1.20667	1.73166	0.102965	0.36404	Up
lnc-MSTRG.34149.1	0.873333	0.323333	-1.43351	0.103468	0.365291	Down
lnc-MSTRG.28326.1	0.001	0.813333	9.6677	0.10359	0.365291	Up
lnc-MSTRG.23809.1	0.523333	0.0866667	-2.59418	0.103625	0.365291	Down
lnc-MSTRG.33163.1	4.90667	10.06	1.03582	0.103841	0.365693	Up
lnc-MSTRG.24648.1	0.736667	0.206667	-1.83371	0.10428	0.366875	Down
lnc-MSTRG.23961.1	0.001	0.66	9.36632	0.104659	0.367497	Up
lnc-MSTRG.21274.3	1.46	3.55667	1.28456	0.104725	0.367497	Up
lnc-MSTRG.5991.1	0.876667	0.35	-1.32467	0.104764	0.367497	Down
lnc-MSTRG.23417.1	0.103333	1.36	3.71823	0.105205	0.368516	Up
lnc-MSTRG.8047.1	4.15333	1.95333	-1.08833	0.105261	0.368516	Down
lnc-MSTRG.5350.1	1.44	0.316667	-2.18503	0.105659	0.36955	Down
lnc-MSTRG.24565.1	10.1733	5.72333	-0.829865	0.106043	0.370528	No
lnc-MSTRG.22962.2	1.91667	1.08333	-0.823122	0.106422	0.371309	No
lnc-MSTRG.33974.1	0.75	0.0966667	-2.9558	0.106474	0.371309	Down
lnc-MSTRG.29275.1	0.576667	2.56333	2.15221	0.106931	0.372275	Up
lnc-MSTRG.12246.1	0.28	0.733333	1.38904	0.106959	0.372275	Up
lnc-MSTRG.13406.2	1.27333	6.28333	2.30292	0.107284	0.373043	Up
lnc-MSTRG.13547.1	2.25	1.06	-1.08586	0.107669	0.374018	Down
lnc-MSTRG.34423.1	3.76333	2.08667	-0.850811	0.108093	0.375129	No
lnc-MSTRG.6181.2	0.383333	1.54333	2.00938	0.108371	0.375728	Up
lnc-MSTRG.31036.2	0.0766667	0.426667	2.47644	0.109092	0.377862	Up
lnc-MSTRG.5144.1	0.626667	0.113333	-2.46713	0.109545	0.379065	Down
lnc-MSTRG.19143.1	11.09	21.8867	0.980793	0.109674	0.379144	No
lnc-MSTRG.11378.1	0.0166667	0.373333	4.48543	0.109917	0.379617	Up
lnc-MSTRG.2365.1	0.0466667	0.32	2.77761	0.110303	0.380583	Up
lnc-MSTRG.14239.1	0.136667	1.46	3.41724	0.110741	0.381727	Up
lnc-MSTRG.9180.1	0.0866667	0.416667	2.26534	0.110926	0.381995	Up
lnc-MSTRG.24124.1	0.503333	1.61333	1.68046	0.111297	0.382757	Up
lnc-MSTRG.12830.2	1.27333	3.76667	1.56468	0.111465	0.382757	Up
lnc-MSTRG.17677.1	4.67	8.76333	0.908057	0.111513	0.382757	No
lnc-MSTRG.29399.1	0.23	0.916667	1.99476	0.111597	0.382757	Up
lnc-MSTRG.17347.1	0.586667	0.04	-3.87447	0.111737	0.382757	Down
lnc-MSTRG.33813.1	4.10667	2.65	-0.631975	0.111789	0.382757	No
lnc-MSTRG.21454.1	1.2	2.97667	1.31066	0.112289	0.3841	Up
lnc-MSTRG.8119.1	1.31333	0.516667	-1.34593	0.112703	0.385148	Down
lnc-MSTRG.4689.1	0.001	1.1	10.1033	0.112959	0.385477	Up
lnc-MSTRG.4657.1	0.106667	0.976667	3.19476	0.113096	0.385477	Up
lnc-MSTRG.28103.1	0.001	0.533333	9.05889	0.113122	0.385477	Up
lnc-MSTRG.10331.1	0.001	0.403333	8.65583	0.113399	0.386051	Up
lnc-MSTRG.630.2	48.96	102.543	1.06656	0.113532	0.386138	Up
lnc-MSTRG.5052.1	0.33	0.0666667	-2.30743	0.113712	0.386382	Down
lnc-MSTRG.6239.2	0.07	0.34	2.28011	0.113863	0.38653	Up
lnc-MSTRG.3127.1	0.103333	0.44	2.0902	0.11488	0.389613	Up
lnc-MSTRG.29467.5	0.001	0.17	7.40939	0.115121	0.390058	Up
lnc-MSTRG.23513.1	1.89333	3.67667	0.95747	0.115345	0.390447	No
lnc-MSTRG.16787.1	1.46667	0.43	-1.77013	0.115882	0.391895	Down
lnc-MSTRG.26332.1	0.83	0.173333	-2.25956	0.116102	0.392269	Down
lnc-MSTRG.7338.5	0.246667	1.14	2.2084	0.116409	0.392935	Up
lnc-MSTRG.1254.1	0.09	0.996667	3.46911	0.116817	0.393941	Up
lnc-MSTRG.5356.1	1.86	1.08667	-0.775393	0.117022	0.394261	No
lnc-MSTRG.26776.1	4.01333	2.52333	-0.66947	0.117417	0.395218	No
lnc-MSTRG.27752.2	3.48	2.21333	-0.652867	0.117726	0.395887	No
lnc-MSTRG.11201.1	0.223333	1.13667	2.34754	0.118097	0.396761	Up
lnc-MSTRG.14397.2	0.0566667	0.576667	3.34717	0.118475	0.397657	Up
lnc-MSTRG.23829.1	1.07333	0.626667	-0.776328	0.118587	0.39766	No
lnc-MSTRG.25908.1	1.49333	0.906667	-0.719892	0.118995	0.398655	No
lnc-MSTRG.11367.1	0.913333	0.336667	-1.43982	0.120014	0.401693	Down
lnc-MSTRG.14328.1	0.523333	1.37333	1.39188	0.120948	0.40444	Up
lnc-MSTRG.28475.1	2.62333	5.01667	0.935328	0.121276	0.40516	No
lnc-MSTRG.6357.1	0.356667	0.001	-8.47843	0.122458	0.40866	Down
lnc-MSTRG.22146.1	0.496667	0.001	-8.95613	0.122552	0.40866	Down
lnc-MSTRG.4682.1	0.266667	1.36333	2.35403	0.122786	0.409059	Up
lnc-MSTRG.21151.1	1.25667	0.693333	-0.857981	0.123036	0.409509	No
lnc-MSTRG.18750.1	2.67333	1.19	-1.16768	0.123629	0.410669	Down
lnc-MSTRG.19405.2	1.33	0.576667	-1.20562	0.123634	0.410669	Down
lnc-MSTRG.3481.1	0.43	1.5	1.80255	0.123729	0.410669	Up
lnc-MSTRG.31790.1	2.93333	6.92333	1.23893	0.124195	0.411835	Up
lnc-MSTRG.30862.1	0.001	0.94	9.87652	0.124325	0.411886	Up
lnc-MSTRG.4702.1	0.263333	1.02667	1.96301	0.125506	0.415413	Up
lnc-MSTRG.13353.1	1.54333	0.443333	-1.79959	0.125694	0.415649	Down
lnc-MSTRG.21577.1	1.77333	5.18667	1.54834	0.125831	0.415719	Up
lnc-MSTRG.23433.4	0.36	1.50333	2.0621	0.12608	0.416158	Up
lnc-MSTRG.17425.1	0.223333	0.973333	2.12374	0.126208	0.416197	Up
lnc-MSTRG.21895.3	1.03	2.00667	0.962157	0.126864	0.417973	No
lnc-MSTRG.13381.1	0.9	0.463333	-0.957875	0.127151	0.418535	No
lnc-MSTRG.11946.1	0.72	0.0333333	-4.43296	0.127382	0.418909	Down
lnc-MSTRG.28837.1	0.403333	1.07	1.40757	0.127664	0.419343	Up
lnc-MSTRG.29077.1	0.986667	1.88667	0.935205	0.127748	0.419343	No
lnc-MSTRG.8760.1	0.796667	0.001	-9.63783	0.127912	0.419495	Down
lnc-MSTRG.23026.1	0.5	0.001	-8.96578	0.128283	0.420325	Down
lnc-MSTRG.14517.1	0.56	1.23	1.13516	0.128508	0.420677	Up
lnc-MSTRG.27623.1	0.513333	0.0466667	-3.45943	0.128992	0.421318	Down
lnc-MSTRG.4356.1	0.56	0.0733333	-2.93289	0.129014	0.421318	Down
lnc-MSTRG.1976.2	1.50333	0.946667	-0.667237	0.129291	0.421318	No
lnc-MSTRG.7141.6	0.17	1.18333	2.79925	0.129412	0.421318	Up
lnc-MSTRG.3808.1	7.52333	15.36	1.02973	0.12946	0.421318	Up
lnc-MSTRG.6181.1	0.826667	2.13333	1.36773	0.129525	0.421318	Up
lnc-MSTRG.26156.1	12.62	21.3833	0.760775	0.12964	0.421318	No
lnc-MSTRG.565.1	4.98	2.83333	-0.813645	0.129645	0.421318	No
lnc-MSTRG.32007.1	0.403333	0.001	-8.65583	0.130031	0.422188	Down
lnc-MSTRG.22743.1	1.33667	0.64	-1.0625	0.1302	0.422354	Down
lnc-MSTRG.8487.1	0.0333333	0.473333	3.82782	0.130579	0.422921	Up
lnc-MSTRG.31563.1	3.52667	6.41667	0.863519	0.130612	0.422921	No
lnc-MSTRG.17133.1	1.49333	0.726667	-1.03917	0.130796	0.423136	Down
lnc-MSTRG.7863.1	0.933333	0.001	-9.86625	0.13097	0.423315	Down
lnc-MSTRG.20542.1	0.001	0.883333	9.78681	0.131118	0.423411	Up
lnc-MSTRG.21367.2	4.45333	3.02333	-0.558746	0.131449	0.424098	No
lnc-MSTRG.33945.1	0.693333	0.0766667	-3.17688	0.131686	0.424479	Down
lnc-MSTRG.17025.1	1.76667	0.956667	-0.884942	0.132142	0.425168	No
lnc-MSTRG.32405.1	0.956667	0.3	-1.67305	0.132235	0.425168	Down
lnc-MSTRG.646.1	11.2967	7.31333	-0.627296	0.132283	0.425168	No
lnc-MSTRG.5198.1	0.196667	0.893333	2.18345	0.132375	0.425168	Up
lnc-MSTRG.34507.1	0.27	0.02	-3.75489	0.133521	0.428466	Down
lnc-MSTRG.25515.2	0.6	1.99667	1.73456	0.134043	0.429509	Up
lnc-MSTRG.2859.1	0.886667	1.66	0.904719	0.134086	0.429509	No
lnc-MSTRG.20895.3	0.001	0.323333	8.33688	0.134468	0.430345	Up
lnc-MSTRG.10247.1	3.20667	7.08333	1.14335	0.134684	0.430547	Up
lnc-MSTRG.22819.1	1.62667	4.00333	1.29928	0.134885	0.430547	Up
lnc-MSTRG.22917.3	0.403333	1.05333	1.38492	0.134978	0.430547	Up
lnc-MSTRG.25980.1	0.106667	1.26333	3.56605	0.135063	0.430547	Up
lnc-MSTRG.32042.1	0.306667	0.03	-3.35364	0.135132	0.430547	Down
lnc-MSTRG.7859.1	1.32	0.64	-1.04439	0.13571	0.432002	Down
lnc-MSTRG.17476.1	2.12	3.73	0.815111	0.135865	0.43211	No
lnc-MSTRG.7731.1	0.913333	0.443333	-1.04275	0.137176	0.435893	Down
lnc-MSTRG.33981.1	0.0233333	0.463333	4.31159	0.137624	0.436537	Up
lnc-MSTRG.25299.1	0.506667	0.15	-1.75607	0.137672	0.436537	Down
lnc-MSTRG.24025.1	4.15667	7.68333	0.886305	0.137745	0.436537	No
lnc-MSTRG.5547.1	0.693333	0.166667	-2.05658	0.138198	0.437345	Down
lnc-MSTRG.21517.1	0.24	0.001	-7.90689	0.138244	0.437345	Down
lnc-MSTRG.3767.1	0.663333	0.001	-9.37359	0.138714	0.438444	Down
lnc-MSTRG.15759.1	9.39667	16.4933	0.811662	0.138907	0.438665	No
lnc-MSTRG.28377.1	0.0166667	0.32	4.26303	0.139078	0.43882	Up
lnc-MSTRG.15999.3	2.74333	1.03667	-1.40398	0.139367	0.439345	Down
lnc-MSTRG.25908.2	12.0067	8.87	-0.43683	0.139648	0.439842	No
lnc-MSTRG.34264.1	0.876667	0.22	-1.99452	0.14046	0.441382	Down
lnc-MSTRG.11365.5	1.13	2.30667	1.02949	0.140471	0.441382	Up
lnc-MSTRG.14849.1	1.02667	0.546667	-0.909235	0.140507	0.441382	No
lnc-MSTRG.21544.2	1.17	2.07667	0.827761	0.14076	0.441506	No
lnc-MSTRG.5020.1	0.756667	3.05667	2.01423	0.140793	0.441506	Up
lnc-MSTRG.29418.1	0.001	0.573333	9.16323	0.141246	0.442538	Up
lnc-MSTRG.13607.2	0.926667	0.296667	-1.64321	0.141961	0.444389	Down
lnc-MSTRG.18701.2	4.74667	11.7633	1.30931	0.142135	0.444401	Up
lnc-MSTRG.31408.1	0.39	1.89333	2.27938	0.142237	0.444401	Up
lnc-MSTRG.11504.2	2.77	1.91	-0.536313	0.142337	0.444401	No
lnc-MSTRG.23056.1	1.45667	0.943333	-0.626831	0.142592	0.444807	No
lnc-MSTRG.31888.1	1.36667	0.106667	-3.67948	0.142823	0.44514	Down
lnc-MSTRG.34402.1	0.143333	0.646667	2.17365	0.142988	0.445266	Up
lnc-MSTRG.10366.2	6.53667	4.55333	-0.521632	0.144097	0.44833	No
lnc-MSTRG.24230.5	0.766667	1.99	1.3761	0.144537	0.449308	Up
lnc-MSTRG.14812.1	0.123333	0.446667	1.85664	0.144757	0.449602	Up
lnc-MSTRG.4333.1	0.0466667	0.613333	3.71621	0.145088	0.450238	Up
lnc-MSTRG.24958.1	0.303333	0.926667	1.61115	0.145957	0.452544	Up
lnc-MSTRG.31818.1	4.60333	2.16667	-1.0872	0.146131	0.452689	Down
lnc-MSTRG.20497.3	0.193333	1.29667	2.74565	0.146463	0.453085	Up
lnc-MSTRG.20997.1	0.71	0.203333	-1.80397	0.146518	0.453085	Down
lnc-MSTRG.16163.2	1.58	2.62	0.729642	0.146638	0.453085	No
lnc-MSTRG.3903.1	1.25	4.22333	1.75645	0.147121	0.454184	Up
lnc-MSTRG.24108.1	1.54333	0.27	-2.51502	0.147365	0.454204	Down
lnc-MSTRG.20292.5	1.11667	0.32	-1.80305	0.147382	0.454204	Down
lnc-MSTRG.5728.1	1.35	0.473333	-1.51203	0.147547	0.454299	Down
lnc-MSTRG.17305.2	1.36333	0.54	-1.33611	0.147852	0.454299	Down
lnc-MSTRG.21163.1	3.14333	5.65333	0.846806	0.147943	0.454299	No
lnc-MSTRG.8997.1	1.51667	0.46	-1.7212	0.14795	0.454299	Down
lnc-MSTRG.1734.1	0.473333	1.06667	1.17218	0.148047	0.454299	Up
lnc-MSTRG.18813.2	1.82667	1.09667	-0.736088	0.14848	0.455056	No
lnc-MSTRG.16000.1	0.986667	0.153333	-2.68589	0.148548	0.455056	Down
lnc-MSTRG.8995.1	0.23	1.41333	2.6194	0.149257	0.456489	Up
lnc-MSTRG.16645.1	0.81	0.203333	-1.99408	0.149421	0.456489	Down
lnc-MSTRG.34509.1	0.846667	0.196667	-2.10604	0.149438	0.456489	Down
lnc-MSTRG.2546.2	5.81	1.33667	-2.1199	0.149605	0.456489	Down
lnc-MSTRG.24898.2	0.13	1.38333	3.41157	0.149654	0.456489	Up
lnc-MSTRG.7856.1	0.99	0.366667	-1.43296	0.149962	0.457038	Down
lnc-MSTRG.24593.2	0.133333	0.48	1.848	0.15012	0.457131	Up
lnc-MSTRG.15377.1	0.72	0.001	-9.49185	0.150759	0.458029	Down
lnc-MSTRG.28997.1	0.0533333	0.643333	3.59246	0.150774	0.458029	Up
lnc-MSTRG.14782.1	27.6067	49.8267	0.851901	0.150799	0.458029	No
lnc-MSTRG.1357.1	1.2	0.676667	-0.826517	0.150978	0.458185	No
lnc-MSTRG.7447.1	0.91	1.72667	0.924051	0.151707	0.459713	No
lnc-MSTRG.20098.2	0.166667	0.796667	2.25701	0.151739	0.459713	Up
lnc-MSTRG.2841.1	0.776667	1.98	1.35013	0.151974	0.460035	Up
lnc-MSTRG.8253.2	0.09	0.853333	3.24511	0.152315	0.460679	Up
lnc-MSTRG.1898.1	1.69333	0.51	-1.7313	0.152531	0.460702	Down
lnc-MSTRG.7744.1	0.001	0.263333	8.04075	0.15258	0.460702	Up
lnc-MSTRG.32583.4	0.703333	1.57	1.15848	0.153055	0.461746	Up
lnc-MSTRG.7635.1	0.0533333	0.6	3.49185	0.153473	0.462321	Up
lnc-MSTRG.13439.2	0.576667	1.69333	1.55406	0.153504	0.462321	Up
lnc-MSTRG.14607.1	0.001	0.3	8.22882	0.154039	0.463543	Up
lnc-MSTRG.22378.1	0.273333	1.18667	2.11818	0.154261	0.463821	Up
lnc-MSTRG.3948.1	0.001	0.253333	7.98489	0.154467	0.46405	Up
lnc-MSTRG.4591.1	1.53	0.183333	-3.06099	0.155225	0.465936	Down
lnc-MSTRG.8996.1	2.77	6.85667	1.30762	0.155397	0.465952	Up
lnc-MSTRG.22135.1	6.85	4.69667	-0.544467	0.155491	0.465952	No
lnc-MSTRG.1721.1	0.643333	0.1	-2.68557	0.156015	0.467131	Down
lnc-MSTRG.28671.2	1.82667	0.733333	-1.31667	0.157155	0.470021	Down
lnc-MSTRG.32641.2	0.78	0.116667	-2.74108	0.157314	0.470021	Down
lnc-MSTRG.30128.1	0.683333	2.51333	1.87894	0.157374	0.470021	Up
lnc-MSTRG.28696.1	0.0933333	0.496667	2.41181	0.157513	0.470044	Up
lnc-MSTRG.163.2	1.55	2.79667	0.85144	0.158055	0.471268	No
lnc-MSTRG.18137.1	19.9733	9.86333	-1.01793	0.158869	0.473015	Down
lnc-MSTRG.13359.1	0.833333	0.0966667	-3.1078	0.158954	0.473015	Down
lnc-MSTRG.32152.1	4.56333	3.14	-0.539323	0.159081	0.473015	No
lnc-MSTRG.31986.1	1.15667	0.346667	-1.73835	0.159287	0.473015	Down
lnc-MSTRG.19255.2	0.45	1.06	1.23607	0.159344	0.473015	Up
lnc-MSTRG.34226.1	533.87	347.883	-0.617885	0.159506	0.473015	No
lnc-MSTRG.9741.1	7.2	5.44667	-0.402623	0.159566	0.473015	No
lnc-MSTRG.24089.1	0.74	0.15	-2.30256	0.159876	0.473541	Down
lnc-MSTRG.16009.6	0.553333	1.78333	1.68836	0.160169	0.473913	Up
lnc-MSTRG.3085.1	0.95	2.07	1.12363	0.160433	0.473913	Up
lnc-MSTRG.9362.2	0.523333	1.31667	1.33109	0.160503	0.473913	Up
lnc-MSTRG.8917.4	0.256667	1.13667	2.14684	0.160532	0.473913	Up
lnc-MSTRG.30499.1	0.97	0.28	-1.79256	0.16096	0.474787	Down
lnc-MSTRG.30064.2	1.15667	2.63333	1.18692	0.161495	0.475971	Up
lnc-MSTRG.9162.3	1.84333	0.913333	-1.0131	0.161716	0.47623	Down
lnc-MSTRG.31664.1	0.14	0.803333	2.52057	0.1619	0.476381	Up
lnc-MSTRG.21736.2	0.04	0.293333	2.87447	0.162101	0.47658	Up
lnc-MSTRG.7899.1	0.001	0.85	9.73132	0.162766	0.47814	Up
lnc-MSTRG.11073.1	0.526667	0.0366667	-3.84435	0.163212	0.478578	Down
lnc-MSTRG.28342.4	0.0766667	0.47	2.61599	0.163228	0.478578	Up
lnc-MSTRG.503.1	1.15667	0.766667	-0.593302	0.163316	0.478578	No
lnc-MSTRG.29028.4	0.13	0.55	2.08092	0.16421	0.480672	Up
lnc-MSTRG.18570.1	1.02333	0.513333	-0.995308	0.164299	0.480672	No
lnc-MSTRG.27134.1	0.35	0.0533333	-2.71425	0.164635	0.481148	Down
lnc-MSTRG.12334.1	0.0666667	0.633333	3.24793	0.164731	0.481148	Up
lnc-MSTRG.13500.1	0.313333	1.14	1.86326	0.165066	0.481733	Up
lnc-MSTRG.31568.1	0.703333	1.55333	1.14309	0.165276	0.481954	Up
lnc-MSTRG.33151.5	0.0633333	0.33	2.38143	0.166154	0.484121	Up
lnc-MSTRG.12210.2	1.26	3.01333	1.25794	0.166991	0.486163	Up
lnc-MSTRG.4345.1	0.246667	0.793333	1.68536	0.167357	0.486676	Up
lnc-MSTRG.10081.1	0.001	0.81	9.66178	0.167517	0.486676	Up
lnc-MSTRG.11714.1	0.0833333	0.523333	2.65076	0.167705	0.486676	Up
lnc-MSTRG.8453.4	1.11667	0.653333	-0.773307	0.167815	0.486676	No
lnc-MSTRG.33970.1	0.956667	2.33667	1.28836	0.167847	0.486676	Up
lnc-MSTRG.2185.1	0.9	0.456667	-0.978784	0.168558	0.48834	No
lnc-MSTRG.14454.2	0.476667	0.206667	-1.20568	0.169106	0.489532	Down
lnc-MSTRG.21916.1	0.713333	0.0733333	-3.28204	0.169274	0.489622	Down
lnc-MSTRG.23017.2	1.48	0.88	-0.750022	0.169955	0.490946	No
lnc-MSTRG.7386.1	1.03333	0.32	-1.69116	0.170079	0.490946	Down
lnc-MSTRG.29028.5	0.12	0.383333	1.67557	0.170181	0.490946	Up
lnc-MSTRG.813.1	0.233333	0.0566667	-2.04182	0.170302	0.490946	Down
lnc-MSTRG.6119.1	0.843333	0.15	-2.49114	0.170418	0.490946	Down
lnc-MSTRG.8865.1	0.04	0.266667	2.73697	0.170943	0.491891	Up
lnc-MSTRG.12013.1	0.863333	0.32	-1.43185	0.171021	0.491891	Down
lnc-MSTRG.22962.1	1.05667	0.62	-0.76918	0.171942	0.494142	No
lnc-MSTRG.6384.3	0.07	0.463333	2.72662	0.172532	0.495442	Up
lnc-MSTRG.24278.1	1.00667	3.28667	1.70704	0.172756	0.495688	Up
lnc-MSTRG.21771.1	2.83333	1.65	-0.780034	0.173274	0.496432	No
lnc-MSTRG.12684.2	1.08	2.08	0.945552	0.173752	0.496432	No
lnc-MSTRG.2699.1	3.66333	6.58667	0.846392	0.173817	0.496432	No
lnc-MSTRG.657.2	0.18	0.001	-7.49185	0.173903	0.496432	Down
lnc-MSTRG.18786.1	12.5933	24.5467	0.962867	0.174024	0.496432	No
lnc-MSTRG.16310.1	1.47333	3.74333	1.34524	0.174028	0.496432	Up
lnc-MSTRG.9338.1	1.04	2.40667	1.21045	0.17449	0.496432	Up
lnc-MSTRG.22387.1	0.92	0.38	-1.27563	0.174519	0.496432	Down
lnc-MSTRG.15978.1	0.68	0.001	-9.40939	0.174701	0.496432	Down
lnc-MSTRG.20086.1	0.646667	0.001	-9.33688	0.174701	0.496432	Down
lnc-MSTRG.21176.1	0.626667	0.001	-9.29155	0.174701	0.496432	Down
lnc-MSTRG.4099.2	0.1	0.001	-6.64386	0.174701	0.496432	Down
lnc-MSTRG.31966.1	0.68	0.166667	-2.02857	0.17482	0.496432	Down
lnc-MSTRG.23362.1	2.47	1.52667	-0.694126	0.175323	0.497272	No
lnc-MSTRG.12666.1	0.323333	1.34333	2.05472	0.175584	0.497272	Up
lnc-MSTRG.14283.1	0.163333	0.776667	2.24948	0.175621	0.497272	Up
lnc-MSTRG.26204.1	2.01	3.65	0.860701	0.175763	0.497272	No
lnc-MSTRG.26448.1	0.843333	1.84667	1.13075	0.17581	0.497272	Up
lnc-MSTRG.21628.1	0.503333	0.0933333	-2.43105	0.17602	0.497473	Down
lnc-MSTRG.18780.1	1.48667	3.80667	1.35645	0.176653	0.498867	Up
lnc-MSTRG.630.3	9	18.0533	1.00427	0.176836	0.498991	Up
lnc-MSTRG.29818.1	0.203333	1.21	2.57309	0.177248	0.499306	Up
lnc-MSTRG.12664.4	0.69	1.47333	1.09442	0.177341	0.499306	Up
lnc-MSTRG.24719.1	0.29	0.76	1.38995	0.177367	0.499306	Up
lnc-MSTRG.1320.1	0.73	0.09	-3.0199	0.178363	0.501717	Down
lnc-MSTRG.3085.2	0.446667	1.13	1.33905	0.178745	0.502395	Up
lnc-MSTRG.7052.1	1.57667	2.86	0.859137	0.179619	0.504456	No
lnc-MSTRG.9034.1	0.09	1.16333	3.6922	0.180045	0.505257	Up
lnc-MSTRG.27473.2	0.933333	0.226667	-2.04182	0.180329	0.505657	Down
lnc-MSTRG.4951.2	5.88333	11.2333	0.93308	0.180615	0.50606	No
lnc-MSTRG.32789.1	0.001	0.1	6.64386	0.181709	0.508727	Up
lnc-MSTRG.2386.1	0.11	0.373333	1.76296	0.182244	0.509384	Up
lnc-MSTRG.21669.1	0.001	0.493333	8.94642	0.182336	0.509384	Up
lnc-MSTRG.12402.1	9.3	15.6233	0.7484	0.18237	0.509384	No
lnc-MSTRG.18783.2	1.08	0.45	-1.26303	0.182675	0.509659	Down
lnc-MSTRG.17895.1	0.25	0.743333	1.57208	0.182754	0.509659	Up
lnc-MSTRG.16700.1	2.55667	1.34667	-0.924871	0.183115	0.510269	No
lnc-MSTRG.24138.1	0.001	0.613333	9.26053	0.184276	0.513106	Up
lnc-MSTRG.4909.1	1.12667	2.23333	0.987138	0.184539	0.513354	No
lnc-MSTRG.3468.1	3337.02	1935.28	-0.786019	0.184652	0.513354	No
lnc-MSTRG.29772.2	5.76	14.2733	1.30918	0.184889	0.513558	Up
lnc-MSTRG.27405.1	0.63	0.113333	-2.47478	0.1851	0.513558	Down
lnc-MSTRG.20351.2	0.29	0.0966667	-1.58496	0.185156	0.513558	Down
lnc-MSTRG.29961.1	0.001	0.456667	8.835	0.185759	0.514829	Up
lnc-MSTRG.33239.1	0.001	0.756667	9.56351	0.18596	0.514987	Up
lnc-MSTRG.27952.1	0.783333	0.263333	-1.57274	0.186555	0.515626	Down
lnc-MSTRG.34553.1	0.403333	1.37	1.76413	0.186576	0.515626	Up
lnc-MSTRG.3489.1	0.983333	1.98	1.00975	0.186622	0.515626	Up
lnc-MSTRG.29802.2	0.1	0.916667	3.1964	0.186933	0.516086	Up
lnc-MSTRG.394.1	0.126667	0.56	2.14439	0.187887	0.518318	Up
lnc-MSTRG.4014.1	1.12	0.53	-1.07943	0.188525	0.519323	Down
lnc-MSTRG.22315.1	0.313333	1.09	1.79856	0.188541	0.519323	Up
lnc-MSTRG.8990.1	0.001	0.69	9.43045	0.188694	0.519343	Up
lnc-MSTRG.21673.1	0.001	0.323333	8.33688	0.188963	0.519588	Up
lnc-MSTRG.4903.1	0.001	0.343333	8.42347	0.189073	0.519588	Up
lnc-MSTRG.4158.1	0.763333	1.85333	1.27974	0.18944	0.520196	Up
lnc-MSTRG.5060.1	1.05	0.08	-3.71425	0.190954	0.523733	Down
lnc-MSTRG.12639.1	0.586667	0.001	-9.1964	0.191376	0.523733	Down
lnc-MSTRG.13299.1	0.64	0.001	-9.32193	0.191376	0.523733	Down
lnc-MSTRG.19831.1	0.736667	0.001	-9.52487	0.191376	0.523733	Down
lnc-MSTRG.2976.1	3.72333	6.77667	0.863981	0.19146	0.523733	No
lnc-MSTRG.32000.1	0.0566667	0.85	3.90689	0.19204	0.524534	Up
lnc-MSTRG.6482.1	0.586667	1.45	1.30544	0.192046	0.524534	Up
lnc-MSTRG.19565.4	6.42	4.71	-0.446846	0.193253	0.527416	No
lnc-MSTRG.8519.3	0.001	0.953333	9.89684	0.193506	0.527416	Up
lnc-MSTRG.4020.4	0.3	0.001	-8.22882	0.193598	0.527416	Down
lnc-MSTRG.6694.2	2.23333	1.6	-0.481127	0.193814	0.527416	No
lnc-MSTRG.16783.1	0.813333	0.166667	-2.28688	0.193838	0.527416	Down
lnc-MSTRG.27676.1	4.1	2.81333	-0.543343	0.194049	0.52759	No
lnc-MSTRG.6540.1	4.87667	3.24333	-0.588418	0.194398	0.528133	No
lnc-MSTRG.11523.1	1.47	2.50667	0.769954	0.194544	0.528133	No
lnc-MSTRG.4845.1	0.04	0.206667	2.36923	0.194939	0.528426	Up
lnc-MSTRG.15398.2	0.436667	1.17	1.4219	0.194948	0.528426	Up
lnc-MSTRG.20432.1	10.9967	19.9733	0.861009	0.195628	0.529868	No
lnc-MSTRG.7751.2	0.373333	1.04667	1.48727	0.196768	0.532553	Up
lnc-MSTRG.15467.1	3.30333	6.18	0.903684	0.196952	0.532648	No
lnc-MSTRG.27548.1	0.001	0.46	8.84549	0.197512	0.533376	Up
lnc-MSTRG.23469.1	1.67667	0.803333	-1.06153	0.197577	0.533376	Down
lnc-MSTRG.8855.1	0.001	0.353333	8.46489	0.197668	0.533376	Up
lnc-MSTRG.34575.1	0.85	2.86333	1.75216	0.198171	0.534329	Up
lnc-MSTRG.24053.1	0.766667	0.443333	-0.790208	0.19848	0.534376	No
lnc-MSTRG.19325.1	0.0533333	0.426667	3	0.198487	0.534376	Up
lnc-MSTRG.26399.1	0.0733333	0.743333	3.34147	0.199115	0.535663	Up
lnc-MSTRG.30458.1	10.4467	6.92333	-0.593504	0.199921	0.5372	No
lnc-MSTRG.16650.1	0.13	0.486667	1.90442	0.20011	0.5372	Up
lnc-MSTRG.4687.1	0.276667	0.001	-8.11201	0.200187	0.5372	Down
lnc-MSTRG.31916.1	2.22333	4.15333	0.901545	0.200286	0.5372	No
lnc-MSTRG.27264.1	1.82333	1.05333	-0.791616	0.200633	0.537726	No
lnc-MSTRG.4599.5	1.49667	3.21	1.10082	0.201204	0.538852	Up
lnc-MSTRG.24014.1	1.16667	0.0566667	-4.36375	0.20173	0.539858	Down
lnc-MSTRG.25550.1	0.433333	1.22667	1.50119	0.201967	0.540089	Up
lnc-MSTRG.24242.3	1.56	2.67333	0.777094	0.20221	0.540193	No
lnc-MSTRG.21197.1	0.856667	2.55	1.57369	0.202308	0.540193	Up
lnc-MSTRG.15020.1	9.82667	6.58667	-0.577154	0.202616	0.540613	No
lnc-MSTRG.2327.1	0.203333	0.756667	1.89581	0.202861	0.540863	Up
lnc-MSTRG.33276.1	0.266667	0.001	-8.05889	0.20338	0.541739	Down
lnc-MSTRG.26043.1	1.66	1.14	-0.542149	0.203626	0.541739	No
lnc-MSTRG.5324.1	5.09333	8.91667	0.807894	0.203793	0.541739	No
lnc-MSTRG.3925.1	2.25667	1.41	-0.678498	0.203796	0.541739	No
lnc-MSTRG.16485.2	0.21	1.34	2.67377	0.20404	0.541986	Up
lnc-MSTRG.12953.1	11.11	8.15333	-0.446397	0.204282	0.542227	No
lnc-MSTRG.5657.1	1.65	0.846667	-0.9626	0.204782	0.542678	No
lnc-MSTRG.9227.2	1.66667	0.956667	-0.800877	0.204854	0.542678	No
lnc-MSTRG.4160.1	0.48	0.001	-8.90689	0.204907	0.542678	Down
lnc-MSTRG.11509.1	1.30667	0.78	-0.744345	0.205357	0.543468	No
lnc-MSTRG.26266.3	1.05	0.683333	-0.619728	0.20608	0.544703	No
lnc-MSTRG.28653.1	0.0966667	0.56	2.53434	0.206128	0.544703	Up
lnc-MSTRG.15430.1	0.846667	0.473333	-0.838938	0.207371	0.547313	No
lnc-MSTRG.5059.1	1.31667	0.59	-1.1581	0.207422	0.547313	Down
lnc-MSTRG.32583.1	1.59333	3.09667	0.958668	0.208476	0.549687	No
lnc-MSTRG.13589.1	0.42	1.13333	1.43211	0.208718	0.549853	Up
lnc-MSTRG.26486.1	0.18	0.59	1.71272	0.208921	0.549853	Up
lnc-MSTRG.7485.3	0.546667	2.02	1.88562	0.209	0.549853	Up
lnc-MSTRG.23433.3	0.46	1.27667	1.47268	0.209302	0.550128	Up
lnc-MSTRG.24683.1	1.97	4.28	1.11942	0.209481	0.550128	Up
lnc-MSTRG.18015.1	2.60667	2.04333	-0.351282	0.209565	0.550128	No
lnc-MSTRG.1773.1	0.001	0.52	9.02237	0.210128	0.551201	Up
lnc-MSTRG.7896.1	0.453333	1.68	1.88982	0.210367	0.551422	Up
lnc-MSTRG.11417.1	0.673333	0.373333	-0.850857	0.21172	0.552774	No
lnc-MSTRG.31638.1	3.72	2.41667	-0.622284	0.212099	0.552774	No
lnc-MSTRG.10046.1	0.616667	0.001	-9.26835	0.212118	0.552774	Down
lnc-MSTRG.10107.1	0.633333	0.001	-9.30682	0.212118	0.552774	Down
lnc-MSTRG.14235.1	0.6	0.001	-9.22882	0.212118	0.552774	Down
lnc-MSTRG.25409.1	0.706667	0.001	-9.46489	0.212118	0.552774	Down
lnc-MSTRG.27778.1	0.696667	0.001	-9.44432	0.212118	0.552774	Down
lnc-MSTRG.32141.1	0.636667	0.001	-9.31439	0.212118	0.552774	Down
lnc-MSTRG.31825.6	0.466667	0.96	1.04064	0.212812	0.55418	Up
lnc-MSTRG.15152.1	1.21333	0.243333	-2.31797	0.212997	0.554258	Down
lnc-MSTRG.2741.1	0.72	1.54	1.09686	0.213704	0.555694	Up
lnc-MSTRG.24943.1	0.956667	0.32	-1.57994	0.214133	0.556206	Down
lnc-MSTRG.33156.1	0.001	0.08	6.32193	0.214299	0.556206	Up
lnc-MSTRG.28366.1	0.51	0.123333	-2.04793	0.214368	0.556206	Down
lnc-MSTRG.24639.1	4.30333	2.87667	-0.581057	0.214644	0.556518	No
lnc-MSTRG.9294.1	1.77667	0.966667	-0.878083	0.215078	0.557241	No
lnc-MSTRG.9043.1	1.18	2.52667	1.09845	0.215546	0.558049	Up
lnc-MSTRG.19849.1	0.983333	1.79333	0.866891	0.216934	0.561214	No
lnc-MSTRG.24281.1	0.0633333	0.6	3.24393	0.217082	0.561214	Up
lnc-MSTRG.10500.1	0.001	0.27	8.07682	0.217452	0.561765	Up
lnc-MSTRG.33783.1	2.15667	4.95667	1.20057	0.217779	0.562202	Up
lnc-MSTRG.7841.1	0.66	0.11	-2.58496	0.217999	0.562366	Down
lnc-MSTRG.26058.1	0.18	0.726667	2.0133	0.218332	0.562818	Up
lnc-MSTRG.866.1	0.36	0.753333	1.06529	0.218689	0.563334	Up
lnc-MSTRG.30285.2	0.0366667	0.283333	2.94996	0.219107	0.563613	Up
lnc-MSTRG.21956.1	12.3767	7.35667	-0.750499	0.219264	0.563613	No
lnc-MSTRG.13462.2	3.03	1.81	-0.743328	0.21927	0.563613	No
lnc-MSTRG.21092.1	5.94333	9.86	0.730315	0.219751	0.564443	No
lnc-MSTRG.24262.1	0.263333	0.553333	1.07126	0.22027	0.56537	Up
lnc-MSTRG.25839.1	0.0933333	0.553333	2.56768	0.221296	0.567204	Up
lnc-MSTRG.3805.1	0.213333	1.41	2.72451	0.221302	0.567204	Up
lnc-MSTRG.22359.1	0.283333	0.823333	1.53898	0.221474	0.567239	Up
lnc-MSTRG.34169.1	0.0733333	0.59	3.00817	0.221665	0.567323	Up
lnc-MSTRG.26416.1	2.17333	1.44	-0.593841	0.221916	0.56756	No
lnc-MSTRG.32081.1	0.76	1.61	1.08299	0.222137	0.567718	Up
lnc-MSTRG.14293.1	1.02333	1.95333	0.932662	0.222456	0.568013	No
lnc-MSTRG.30198.1	0.263333	1.04667	1.99084	0.22257	0.568013	Up
lnc-MSTRG.28698.1	0.613333	1.73	1.49603	0.224102	0.571515	Up
lnc-MSTRG.23900.1	4.76333	3.53	-0.432303	0.224392	0.571847	No
lnc-MSTRG.4599.4	0.616667	1.20333	0.964474	0.224728	0.572297	No
lnc-MSTRG.4491.1	1.39	2.45333	0.819658	0.225139	0.572326	No
lnc-MSTRG.18877.1	0.423333	0.116667	-1.8594	0.225213	0.572326	Down
lnc-MSTRG.32631.3	0.42	1.03	1.29418	0.225219	0.572326	Up
lnc-MSTRG.1570.1	7.12667	3.82667	-0.897139	0.226587	0.574976	No
lnc-MSTRG.22162.1	0.51	0.0866667	-2.55695	0.226777	0.574976	Down
lnc-MSTRG.22999.1	0.63	0.136667	-2.20469	0.226891	0.574976	Down
lnc-MSTRG.2436.1	1.79667	2.87667	0.679075	0.226905	0.574976	No
lnc-MSTRG.11811.1	0.05	0.276667	2.46815	0.227164	0.575224	Up
lnc-MSTRG.28438.1	1.96667	3.35667	0.771277	0.227764	0.57564	No
lnc-MSTRG.2380.3	0.616667	0.186667	-1.72403	0.227791	0.57564	Down
lnc-MSTRG.21823.1	0.256667	0.75	1.54699	0.227989	0.57564	Up
lnc-MSTRG.23054.1	0.873333	1.63333	0.903215	0.228086	0.57564	No
lnc-MSTRG.12962.3	0.396667	0.856667	1.11081	0.228133	0.57564	Up
lnc-MSTRG.12465.1	0.001	0.14	7.12928	0.228599	0.576411	Up
lnc-MSTRG.3712.1	0.001	0.906667	9.82443	0.22901	0.577041	Up
lnc-MSTRG.18835.1	0.926667	0.436667	-1.08552	0.229487	0.577556	Down
lnc-MSTRG.23159.1	0.706667	0.1	-2.82103	0.229537	0.577556	Down
lnc-MSTRG.24031.1	1.03667	0.42	-1.30349	0.230319	0.579114	Down
lnc-MSTRG.15774.1	0.106667	0.506667	2.24793	0.231125	0.580406	Up
lnc-MSTRG.2403.1	2.77667	2.15667	-0.364551	0.231157	0.580406	No
lnc-MSTRG.29958.1	0.72	2.60667	1.85614	0.232517	0.583413	Up
lnc-MSTRG.17528.1	0.606667	0.001	-9.24476	0.233022	0.58427	Down
lnc-MSTRG.34374.1	0.001	0.16	7.32193	0.233397	0.584777	Up
lnc-MSTRG.23948.4	0.173333	1.02	2.55695	0.233551	0.584777	Up
lnc-MSTRG.1719.3	1.68333	4.38333	1.38071	0.234908	0.587475	Up
lnc-MSTRG.31620.2	2.2	4.65667	1.08179	0.234957	0.587475	Up
lnc-MSTRG.11709.5	0.0833333	0.001	-6.38082	0.236165	0.589505	Down
lnc-MSTRG.31009.2	0.05	0.36	2.848	0.237161	0.589505	Up
lnc-MSTRG.34158.1	5.75333	4.13333	-0.477092	0.237431	0.589505	No
lnc-MSTRG.30139.1	0.386667	1.19	1.6218	0.23799	0.589505	Up
lnc-MSTRG.13051.1	0.6	0.001	-9.22882	0.238806	0.589505	Down
lnc-MSTRG.17657.1	0.62	0.001	-9.27612	0.238806	0.589505	Down
lnc-MSTRG.18062.1	0.633333	0.001	-9.30682	0.238806	0.589505	Down
lnc-MSTRG.23912.1	0.583333	0.001	-9.18818	0.238806	0.589505	Down
lnc-MSTRG.24212.1	0.626667	0.001	-9.29155	0.238806	0.589505	Down
lnc-MSTRG.27035.1	0.633333	0.001	-9.30682	0.238806	0.589505	Down
lnc-MSTRG.27319.1	0.596667	0.001	-9.22078	0.238806	0.589505	Down
lnc-MSTRG.28006.1	0.606667	0.001	-9.24476	0.238806	0.589505	Down
lnc-MSTRG.28950.1	0.603333	0.001	-9.23681	0.238806	0.589505	Down
lnc-MSTRG.30405.1	0.406667	0.001	-8.6677	0.238806	0.589505	Down
lnc-MSTRG.3291.1	0.616667	0.001	-9.26835	0.238806	0.589505	Down
lnc-MSTRG.4693.1	0.616667	0.001	-9.26835	0.238806	0.589505	Down
lnc-MSTRG.5123.3	0.0966667	0.001	-6.59495	0.238806	0.589505	Down
lnc-MSTRG.9941.4	0.0433333	0.246667	2.50901	0.238894	0.589505	Up
lnc-MSTRG.33696.1	0.001	0.223333	7.80305	0.239007	0.589505	Up
lnc-MSTRG.6277.1	0.343333	0.913333	1.41153	0.239126	0.589505	Up
lnc-MSTRG.31157.3	1.00333	0.33	-1.60426	0.239229	0.589505	Down
lnc-MSTRG.29531.1	0.001	0.67	9.38802	0.239661	0.589819	Up
lnc-MSTRG.21518.1	0.596667	0.001	-9.22078	0.239955	0.589819	Down
lnc-MSTRG.32060.1	1.02333	0.463333	-1.14315	0.24011	0.589819	Down
lnc-MSTRG.33795.1	0.001	0.66	9.36632	0.240112	0.589819	Up
lnc-MSTRG.26548.1	2.23	1.32	-0.756506	0.240181	0.589819	No
lnc-MSTRG.10892.1	0.66	1.26	0.932886	0.240479	0.590147	No
lnc-MSTRG.29960.1	0.63	2.03667	1.69279	0.240723	0.590341	Up
lnc-MSTRG.32019.1	0.04	0.246667	2.62449	0.24094	0.590467	Up
lnc-MSTRG.25968.2	0.296667	0.903333	1.60642	0.242018	0.592704	Up
lnc-MSTRG.6358.2	1.17333	0.343333	-1.77293	0.242518	0.593351	Down
lnc-MSTRG.30452.1	38.6267	14.1067	-1.45322	0.242614	0.593351	Down
lnc-MSTRG.19889.1	0.836667	0.48	-0.801619	0.243269	0.594207	No
lnc-MSTRG.25486.1	0.001	0.653333	9.35168	0.243619	0.594207	Up
lnc-MSTRG.29799.1	0.001	1.25333	10.2916	0.243619	0.594207	Up
lnc-MSTRG.2771.1	0.001	0.37	8.53138	0.243628	0.594207	Up
lnc-MSTRG.1096.5	0.686667	0.35	-0.972255	0.244055	0.594842	No
lnc-MSTRG.24675.1	2.36667	4.83	1.02917	0.245862	0.59884	Up
lnc-MSTRG.3303.2	0.146667	0.996667	2.76457	0.246512	0.599946	Up
lnc-MSTRG.28709.1	0.703333	0.0533333	-3.7211	0.246652	0.599946	Down
lnc-MSTRG.14489.1	0.68	0.05	-3.76553	0.247012	0.600414	Down
lnc-MSTRG.12041.1	0.293333	0.976667	1.73533	0.247909	0.602184	Up
lnc-MSTRG.16336.1	1.09667	0.406667	-1.43121	0.248557	0.60335	Down
lnc-MSTRG.14430.1	0.07	0.39	2.47805	0.249157	0.604257	Up
lnc-MSTRG.33911.1	1.35333	0.616667	-1.13395	0.249269	0.604257	Down
lnc-MSTRG.1451.1	0.843333	1.43333	0.765199	0.24994	0.604546	No
lnc-MSTRG.10779.2	0.233333	0.626667	1.42531	0.249965	0.604546	Up
lnc-MSTRG.17911.3	28.4967	44.3933	0.63955	0.250381	0.604546	No
lnc-MSTRG.7583.4	0.346667	0.706667	1.02748	0.250563	0.604546	Up
lnc-MSTRG.16701.1	0.52	0.001	-9.02237	0.25076	0.604546	Down
lnc-MSTRG.23158.1	0.416667	0.001	-8.70275	0.25076	0.604546	Down
lnc-MSTRG.30325.2	0.276667	0.001	-8.11201	0.25076	0.604546	Down
lnc-MSTRG.24016.2	0.996667	1.80333	0.855483	0.251285	0.604546	No
lnc-MSTRG.17227.2	1.07667	2.22333	1.04615	0.251305	0.604546	Up
lnc-MSTRG.34146.5	8.09333	13.7367	0.763226	0.251338	0.604546	No
lnc-MSTRG.13671.1	0.001	0.126667	6.98489	0.251415	0.604546	Up
lnc-MSTRG.8692.2	0.001	0.176667	7.46489	0.251415	0.604546	Up
lnc-MSTRG.17021.7	0.856667	2.11333	1.30271	0.252062	0.604943	Up
lnc-MSTRG.29894.2	0.983333	2.23667	1.1856	0.252068	0.604943	Up
lnc-MSTRG.30595.1	1.12333	0.69	-0.703118	0.252221	0.604943	No
lnc-MSTRG.30460.2	3.30333	2.27333	-0.539113	0.252257	0.604943	No
lnc-MSTRG.32345.1	1.45333	0.976667	-0.573427	0.253045	0.606131	No
lnc-MSTRG.7253.1	1.20667	0.566667	-1.09045	0.253091	0.606131	Down
lnc-MSTRG.22220.2	0.74	1.31333	0.827636	0.254779	0.609764	No
lnc-MSTRG.27700.1	0.203333	0.67	1.72031	0.25637	0.613163	Up
lnc-MSTRG.29474.1	11.9633	9.53	-0.328071	0.257277	0.614921	No
lnc-MSTRG.20512.1	0.0966667	0.5	2.37084	0.257528	0.61511	Up
lnc-MSTRG.9657.1	0.353333	0.02	-4.14296	0.258106	0.61608	Down
lnc-MSTRG.27900.1	0.796667	0.213333	-1.90087	0.258575	0.616533	Down
lnc-MSTRG.28363.1	4.41	2.41	-0.871746	0.258792	0.616533	No
lnc-MSTRG.31410.2	0.36	1.33667	1.89257	0.258813	0.616533	Up
lnc-MSTRG.29230.1	1.01333	0.516667	-0.971803	0.261448	0.622397	No
lnc-MSTRG.12672.1	0.001	0.27	8.07682	0.262128	0.6236	Up
lnc-MSTRG.29690.1	0.87	0.506667	-0.779978	0.262699	0.624542	No
lnc-MSTRG.27065.1	0.596667	0.19	-1.65093	0.263234	0.625399	Down
lnc-MSTRG.16209.1	0.0733333	0.716667	3.28876	0.263909	0.626587	Up
lnc-MSTRG.1837.1	1.25333	0.696667	-0.84723	0.264491	0.627551	No
lnc-MSTRG.27964.1	87.5	52.3833	-0.740175	0.26519	0.628793	No
lnc-MSTRG.25658.1	0.001	0.45	8.81378	0.265826	0.62973	Up
lnc-MSTRG.1388.4	0.846667	1.85	1.12766	0.265937	0.62973	Up
lnc-MSTRG.32324.1	0.81	0.33	-1.29546	0.266673	0.631055	Down
lnc-MSTRG.7078.1	0.596667	0.001	-9.22078	0.267001	0.631414	Down
lnc-MSTRG.30049.1	0.0366667	0.406667	3.47131	0.268468	0.634464	Up
lnc-MSTRG.31732.1	0.001	0.466667	8.86625	0.27079	0.63953	Up
lnc-MSTRG.9530.1	0.253333	0.001	-7.98489	0.272826	0.643647	Down
lnc-MSTRG.15809.1	0.78	0.393333	-0.987722	0.272893	0.643647	No
lnc-MSTRG.29705.1	1.13667	0.49	-1.21396	0.27345	0.644536	Down
lnc-MSTRG.8682.1	0.001	0.2	7.64386	0.273925	0.644748	Up
lnc-MSTRG.12123.1	0.0966667	0.666667	2.78588	0.274628	0.644748	Up
lnc-MSTRG.3116.1	0.956667	0.673333	-0.506695	0.274707	0.644748	No
lnc-MSTRG.13031.1	0.47	0.001	-8.87652	0.274802	0.644748	Down
lnc-MSTRG.18568.1	0.493333	0.001	-8.94642	0.274802	0.644748	Down
lnc-MSTRG.26323.1	0.356667	0.001	-8.47843	0.274802	0.644748	Down
lnc-MSTRG.8695.1	0.413333	0.001	-8.69116	0.274802	0.644748	Down
lnc-MSTRG.21240.1	0.4	2.57667	2.68743	0.275531	0.645047	Up
lnc-MSTRG.28514.1	2.42	0.876667	-1.46491	0.275534	0.645047	Down
lnc-MSTRG.28612.2	0.68	1.36	1	0.275639	0.645047	Up
lnc-MSTRG.18799.1	0.21	0.001	-7.71425	0.275768	0.645047	Down
lnc-MSTRG.28844.1	2.26333	1.57	-0.527685	0.275831	0.645047	No
lnc-MSTRG.21756.1	1.25667	0.473333	-1.40867	0.276497	0.645883	Down
lnc-MSTRG.7047.3	0.956667	1.90667	0.994964	0.276873	0.645883	No
lnc-MSTRG.10845.1	1.49667	3.42667	1.19505	0.276997	0.645883	Up
lnc-MSTRG.29710.6	2.98	6.04	1.01924	0.277154	0.645883	Up
lnc-MSTRG.17425.3	0.686667	2.07333	1.59427	0.277209	0.645883	Up
lnc-MSTRG.32349.1	3.24333	2.57667	-0.331971	0.277271	0.645883	No
lnc-MSTRG.30295.1	0.72	0.173333	-2.05445	0.277822	0.646745	Down
lnc-MSTRG.21912.1	1.13667	0.83	-0.453626	0.278311	0.647462	No
lnc-MSTRG.1457.1	0.526667	0.08	-2.71882	0.278627	0.647651	Down
lnc-MSTRG.12965.1	0.001	0.47	8.87652	0.278754	0.647651	Up
lnc-MSTRG.11516.1	0.0666667	0.506667	2.926	0.27931	0.64852	Up
lnc-MSTRG.8489.1	0.82	2.38667	1.5413	0.279867	0.649393	Up
lnc-MSTRG.31475.1	0.223333	0.76	1.7668	0.280542	0.650537	Up
lnc-MSTRG.9741.2	4.12	0.576667	-2.83683	0.280965	0.650709	Down
lnc-MSTRG.32371.2	0.406667	0.896667	1.14073	0.281014	0.650709	Up
lnc-MSTRG.20098.1	0.47	1.18	1.32805	0.281338	0.650709	Up
lnc-MSTRG.28466.1	0.986667	2.37667	1.2683	0.281439	0.650709	Up
lnc-MSTRG.31773.1	0.001	0.59	9.20457	0.281525	0.650709	Up
lnc-MSTRG.5937.1	1.70333	3.95333	1.21471	0.281843	0.651023	Up
lnc-MSTRG.751.3	0.953333	1.82333	0.935526	0.282146	0.651303	No
lnc-MSTRG.19189.1	46.5967	37.6567	-0.307321	0.282359	0.651372	No
lnc-MSTRG.4383.1	0.623333	0.0966667	-2.68891	0.282713	0.65177	Down
lnc-MSTRG.9353.3	0.001	0.276667	8.11201	0.283053	0.65189	Up
lnc-MSTRG.16245.1	3.52667	6.58333	0.900513	0.283152	0.65189	No
lnc-MSTRG.7023.1	2.80667	2.32667	-0.270593	0.283312	0.65189	No
lnc-MSTRG.28579.1	0.156667	0.593333	1.92114	0.28395	0.652917	Up
lnc-MSTRG.9281.1	0.0466667	0.486667	3.38247	0.284123	0.652917	Up
lnc-MSTRG.7346.3	0.713333	1.87	1.39039	0.284736	0.653575	Up
lnc-MSTRG.7346.4	0.001	0.346667	8.43741	0.284915	0.653575	Up
lnc-MSTRG.9851.1	13.92	11.1167	-0.324435	0.284957	0.653575	No
lnc-MSTRG.15168.1	0.74	0.183333	-2.01306	0.28546	0.653787	Down
lnc-MSTRG.33512.1	0.343333	0.813333	1.24424	0.286051	0.653787	Up
lnc-MSTRG.24231.1	0.63	2.09333	1.73238	0.286096	0.653787	Up
lnc-MSTRG.18493.1	0.233333	0.001	-7.86625	0.286329	0.653787	Down
lnc-MSTRG.21847.1	0.476667	0.001	-8.89684	0.286329	0.653787	Down
lnc-MSTRG.22924.1	0.6	0.001	-9.22882	0.286329	0.653787	Down
lnc-MSTRG.8852.1	0.0466667	0.001	-5.54432	0.286329	0.653787	Down
lnc-MSTRG.3656.1	0.0566667	0.566667	3.32193	0.286899	0.65467	Up
lnc-MSTRG.24275.6	0.001	0.39	8.60733	0.287298	0.655164	Up
lnc-MSTRG.23826.1	2.05667	3.45667	0.749073	0.287861	0.656029	No
lnc-MSTRG.4148.1	0.0633333	0.493333	2.96153	0.288282	0.656571	Up
lnc-MSTRG.20388.2	1.59333	1.21333	-0.393072	0.288759	0.65724	No
lnc-MSTRG.19426.3	2.54	4.16333	0.712911	0.289301	0.658054	No
lnc-MSTRG.7023.3	1.81667	3.11	0.775621	0.289721	0.658592	No
lnc-MSTRG.32717.1	0.41	0.82	1	0.290382	0.659673	Up
lnc-MSTRG.4851.2	0.386667	0.186667	-1.05063	0.29063	0.659819	Down
lnc-MSTRG.34210.1	1.89	3.56333	0.914841	0.290967	0.660165	No
lnc-MSTRG.23354.1	1.53	1.02333	-0.580255	0.291424	0.660783	No
lnc-MSTRG.21419.1	1.12	0.43	-1.38109	0.292114	0.661927	Down
lnc-MSTRG.26397.2	1.16667	1.99	0.770376	0.292457	0.662284	No
lnc-MSTRG.25289.2	0.35	0.0433333	-3.01381	0.293001	0.662834	Down
lnc-MSTRG.13640.1	0.216667	0.0533333	-2.02237	0.293513	0.662834	Down
lnc-MSTRG.30845.1	8.10333	2.58667	-1.64742	0.293584	0.662834	Down
lnc-MSTRG.31780.1	0.353333	0.756667	1.09863	0.293642	0.662834	Up
lnc-MSTRG.3866.1	0.51	0.156667	-1.7028	0.293717	0.662834	Down
lnc-MSTRG.11415.1	0.41	0.146667	-1.48308	0.293811	0.662834	Down
lnc-MSTRG.5411.1	1.87667	1.47333	-0.349089	0.294119	0.663112	No
lnc-MSTRG.16501.1	0.893333	0.49	-0.866417	0.294619	0.663821	No
lnc-MSTRG.32778.1	0.001	0.116667	6.86625	0.294838	0.663897	Up
lnc-MSTRG.617.1	3.51	2.17333	-0.691562	0.295342	0.664613	No
lnc-MSTRG.27249.1	0.43	0.04	-3.42626	0.295629	0.664684	Down
lnc-MSTRG.26887.2	0.376667	0.15	-1.32833	0.295987	0.664684	Down
lnc-MSTRG.13919.1	1.60333	2.87333	0.841651	0.29606	0.664684	No
lnc-MSTRG.19536.1	0.343333	1.16	1.75644	0.296227	0.664684	Up
lnc-MSTRG.27536.1	0.503333	0.0866667	-2.53797	0.296303	0.664684	Down
lnc-MSTRG.29769.2	0.79	0.416667	-0.922959	0.297308	0.666521	No
lnc-MSTRG.16112.1	0.001	0.0933333	6.54432	0.297888	0.667282	Up
lnc-MSTRG.16977.1	0.0833333	0.001	-6.38082	0.29802	0.667282	Down
lnc-MSTRG.25371.1	1.65	1.22667	-0.427723	0.29837	0.667648	No
lnc-MSTRG.18257.1	0.416667	1.09	1.38736	0.299114	0.668555	Up
lnc-MSTRG.8944.1	0.52	0.153333	-1.76184	0.299149	0.668555	Down
lnc-MSTRG.28264.1	0.96	2.29667	1.25844	0.301248	0.672485	Up
lnc-MSTRG.14422.1	0.17	0.37	1.12199	0.301416	0.672485	Up
lnc-MSTRG.14136.1	0.09	0.186667	1.05247	0.301594	0.672485	Up
lnc-MSTRG.12248.1	0.693333	1.32	0.928917	0.30166	0.672485	No
lnc-MSTRG.13743.1	1.74333	1.18	-0.563062	0.302011	0.67269	No
lnc-MSTRG.15819.1	0.206667	0.0966667	-1.09622	0.302128	0.67269	Down
lnc-MSTRG.1274.1	0.213333	0.596667	1.48382	0.303245	0.674758	Up
lnc-MSTRG.23913.1	1.21333	0.413333	-1.5536	0.303703	0.675356	Down
lnc-MSTRG.1756.1	0.0666667	0.486667	2.8679	0.304353	0.676035	Up
lnc-MSTRG.9730.1	0.26	0.756667	1.54115	0.304387	0.676035	Up
lnc-MSTRG.3834.1	0.001	0.343333	8.42347	0.304803	0.676035	Up
lnc-MSTRG.399.1	3.82333	2.39333	-0.67581	0.304864	0.676035	No
lnc-MSTRG.14161.4	1.36333	0.796667	-0.77509	0.304953	0.676035	No
lnc-MSTRG.25118.1	0.29	0.786667	1.4397	0.305968	0.677211	Up
lnc-MSTRG.15594.1	2.05667	3.54333	0.784799	0.30634	0.677211	No
lnc-MSTRG.29977.1	0.001	0.5	8.96578	0.30643	0.677211	Up
lnc-MSTRG.31688.1	0.001	0.526667	9.04075	0.30643	0.677211	Up
lnc-MSTRG.5622.1	0.001	0.653333	9.35168	0.30643	0.677211	Up
lnc-MSTRG.13076.1	0.001	0.78	9.60733	0.306899	0.67783	Up
lnc-MSTRG.29683.3	5.16333	2.16333	-1.25505	0.307107	0.677871	Down
lnc-MSTRG.19298.1	0.21	0.533333	1.34465	0.307899	0.679201	Up
lnc-MSTRG.14645.1	0.0766667	0.366667	2.2578	0.308438	0.679568	Up
lnc-MSTRG.21828.3	0.001	0.07	6.12928	0.308446	0.679568	Up
lnc-MSTRG.20593.2	0.133333	0.001	-7.05889	0.309344	0.679706	Down
lnc-MSTRG.4292.1	0.413333	0.001	-8.69116	0.309344	0.679706	Down
lnc-MSTRG.32340.1	1.42667	2.21333	0.633572	0.309645	0.679706	No
lnc-MSTRG.3451.1	0.15	0.603333	2.00799	0.309754	0.679706	Up
lnc-MSTRG.9247.1	0.68	1.57333	1.21022	0.309956	0.679706	Up
lnc-MSTRG.34189.1	0.9	1.96667	1.12776	0.31016	0.679706	Up
lnc-MSTRG.9051.1	1.63	2.68667	0.720945	0.310204	0.679706	No
lnc-MSTRG.24552.1	0.35	0.943333	1.43041	0.310283	0.679706	Up
lnc-MSTRG.17227.1	0.23	0.476667	1.05135	0.310357	0.679706	Up
lnc-MSTRG.16187.1	0.51	1.05667	1.05095	0.310408	0.679706	Up
lnc-MSTRG.21779.1	0.0366667	0.18	2.29546	0.311006	0.6806	Up
lnc-MSTRG.13213.3	0.176667	0.566667	1.68147	0.311306	0.680838	Up
lnc-MSTRG.16691.1	0.0933333	0.436667	2.22607	0.31159	0.680865	Up
lnc-MSTRG.4036.2	0.673333	1.59	1.23963	0.311923	0.680865	Up
lnc-MSTRG.30689.1	0.97	0.363333	-1.41669	0.312012	0.680865	Down
lnc-MSTRG.28368.1	13.2733	23.4933	0.823721	0.312079	0.680865	No
lnc-MSTRG.19547.1	27.82	20.47	-0.442611	0.312958	0.682225	No
lnc-MSTRG.3852.1	2.43333	5.35	1.1366	0.313084	0.682225	Up
lnc-MSTRG.4683.1	0.001	0.803333	9.64985	0.313673	0.683094	Up
lnc-MSTRG.715.1	7.16667	14.7167	1.03808	0.314539	0.684562	Up
lnc-MSTRG.3884.1	1.87667	0.773333	-1.27901	0.315014	0.685178	Down
lnc-MSTRG.9404.1	3.06	6.08	0.99054	0.315486	0.68569	No
lnc-MSTRG.21944.1	9.47	16.99	0.84325	0.315632	0.68569	No
lnc-MSTRG.14408.1	0.653333	0.133333	-2.29278	0.316413	0.686792	Down
lnc-MSTRG.10803.1	0.773333	0.486667	-0.668156	0.316534	0.686792	No
lnc-MSTRG.4821.1	1.03667	1.92667	0.894155	0.316715	0.686792	No
lnc-MSTRG.15498.1	0.826667	1.63	0.979494	0.317012	0.68702	No
lnc-MSTRG.24786.1	0.001	0.0566667	5.82443	0.31754	0.687331	Up
lnc-MSTRG.3172.1	0.001	0.62	9.27612	0.31754	0.687331	Up
lnc-MSTRG.7005.1	1.86	1.54	-0.272372	0.318254	0.688461	No
lnc-MSTRG.1338.1	2.45667	4.40667	0.842986	0.318788	0.688977	No
lnc-MSTRG.6164.1	0.16	0.001	-7.32193	0.319069	0.688977	Down
lnc-MSTRG.22447.1	0.696667	0.28	-1.31504	0.319071	0.688977	Down
lnc-MSTRG.31554.1	1.77333	0.603333	-1.55544	0.319535	0.689563	Down
lnc-MSTRG.9645.1	1.06333	0.79	-0.428669	0.319994	0.690137	No
lnc-MSTRG.23820.4	2.21333	3.31333	0.582063	0.320377	0.690547	No
lnc-MSTRG.18181.1	2.56667	3.75	0.546995	0.32112	0.691654	No
lnc-MSTRG.34475.1	0.37	1.05	1.50479	0.321375	0.691654	Up
lnc-MSTRG.7346.2	0.556667	1.11667	1.00431	0.321594	0.691654	Up
lnc-MSTRG.10796.1	1.89	3	0.666576	0.321664	0.691654	No
lnc-MSTRG.6070.1	0.743333	0.166667	-2.15704	0.321925	0.6918	Down
lnc-MSTRG.26353.1	0.273333	0.97	1.82732	0.322898	0.693474	Up
lnc-MSTRG.8255.1	0.001	0.28	8.12928	0.323785	0.694963	Up
lnc-MSTRG.422.1	0.123333	0.656667	2.4126	0.324162	0.695355	Up
lnc-MSTRG.9300.1	1.06	1.71333	0.692742	0.324666	0.696018	No
lnc-MSTRG.33334.8	0.28	0.916667	1.71097	0.325462	0.697215	Up
lnc-MSTRG.10788.1	0.52	0.0666667	-2.96347	0.325614	0.697215	Down
lnc-MSTRG.6027.1	0.0766667	0.703333	3.19754	0.325927	0.697467	Up
lnc-MSTRG.32377.1	0.4	0.001	-8.64386	0.326875	0.69866	Down
lnc-MSTRG.3356.1	0.27	0.001	-8.07682	0.326875	0.69866	Down
lnc-MSTRG.1844.1	0.001	0.366667	8.51833	0.327127	0.698782	Up
lnc-MSTRG.33515.1	0.37	1.00667	1.44399	0.327888	0.699287	Up
lnc-MSTRG.14941.1	0.88	0.266667	-1.72247	0.327996	0.699287	Down
lnc-MSTRG.21484.1	0.07	0.413333	2.56188	0.328012	0.699287	Up
lnc-MSTRG.30155.1	1.16667	0.56	-1.05889	0.328145	0.699287	Down
lnc-MSTRG.18591.1	0.643333	1.30333	1.01857	0.32839	0.699392	Up
lnc-MSTRG.29966.2	0.413333	0.166667	-1.31034	0.329551	0.701447	Down
lnc-MSTRG.31494.1	1.19333	0.433333	-1.46145	0.33011	0.701832	Down
lnc-MSTRG.29948.1	1.06	0.633333	-0.743027	0.330124	0.701832	No
lnc-MSTRG.7047.4	0.77	1.36333	0.824208	0.33053	0.702217	No
lnc-MSTRG.1286.1	0.143333	0.753333	2.39391	0.330753	0.702217	Up
lnc-MSTRG.26239.2	0.02	0.001	-4.32193	0.330894	0.702217	Down
lnc-MSTRG.19042.1	2.03667	3.84	0.914896	0.331478	0.70264	No
lnc-MSTRG.23227.1	1.03667	2.01	0.955243	0.331486	0.70264	No
lnc-MSTRG.24053.2	0.533333	0.15	-1.83007	0.332213	0.703765	Down
lnc-MSTRG.6589.1	0.001	0.13	7.02237	0.332933	0.70462	Up
lnc-MSTRG.34596.1	49.7967	40.14	-0.311009	0.333011	0.70462	No
lnc-MSTRG.24748.1	0.296667	0.963333	1.69919	0.333663	0.705522	Up
lnc-MSTRG.2996.1	1.14	0.523333	-1.12323	0.333921	0.705522	Down
lnc-MSTRG.25515.1	0.573333	1.69667	1.56526	0.334213	0.705522	Up
lnc-MSTRG.30436.1	1.16	0.726667	-0.674759	0.334226	0.705522	No
lnc-MSTRG.7560.1	0.47	0.193333	-1.28157	0.335223	0.706108	Down
lnc-MSTRG.23487.1	0.001	0.333333	8.38082	0.335244	0.706108	Up
lnc-MSTRG.12166.1	0.566667	1.13333	1	0.335363	0.706108	No
lnc-MSTRG.24015.1	0.38	0.07	-2.44057	0.335409	0.706108	Down
lnc-MSTRG.15120.1	1.00333	0.473333	-1.08387	0.33549	0.706108	Down
lnc-MSTRG.19912.1	1.32667	2.56667	0.95209	0.336153	0.707086	No
lnc-MSTRG.34337.2	0.123333	0.643333	2.383	0.336969	0.707784	Up
lnc-MSTRG.5800.3	1.41	0.896667	-0.653051	0.337037	0.707784	No
lnc-MSTRG.2737.2	0.5	1.14667	1.19745	0.337262	0.707784	Up
lnc-MSTRG.4436.1	0.323333	0.001	-8.33688	0.337365	0.707784	Down
lnc-MSTRG.13944.1	1.26667	2.14333	0.758819	0.337473	0.707784	No
lnc-MSTRG.5777.1	1.00333	1.88667	0.911039	0.337845	0.708148	No
lnc-MSTRG.7947.1	0.273333	0.826667	1.59664	0.338187	0.708451	Up
lnc-MSTRG.1028.1	0.603333	1.27667	1.08135	0.338664	0.709035	Up
lnc-MSTRG.3787.1	0.0933333	0.001	-6.54432	0.339676	0.710738	Down
lnc-MSTRG.17911.1	9.64	13.67	0.503908	0.340191	0.711399	No
lnc-MSTRG.5683.1	0.506667	0.04	-3.66297	0.340884	0.712431	Down
lnc-MSTRG.14517.3	0.9	0.36	-1.32193	0.341735	0.713582	Down
lnc-MSTRG.16309.1	0.163333	0.916667	2.48858	0.341833	0.713582	Up
lnc-MSTRG.12582.1	0.206667	0.683333	1.72528	0.342653	0.714512	Up
lnc-MSTRG.17302.3	0.316667	0.77	1.28189	0.342953	0.714512	Up
lnc-MSTRG.5278.1	0.02	0.163333	3.02975	0.342987	0.714512	Up
lnc-MSTRG.31452.1	0.17	0.556667	1.71128	0.343078	0.714512	Up
lnc-MSTRG.17994.1	1.23	1.97	0.679537	0.343289	0.714537	No
lnc-MSTRG.27691.1	2.15333	4.39333	1.02874	0.343898	0.715387	Up
lnc-MSTRG.21807.1	6.93	5.12	-0.436712	0.344508	0.716241	No
lnc-MSTRG.6045.3	0.001	0.16	7.32193	0.344918	0.716393	Up
lnc-MSTRG.20329.1	0.803333	0.316667	-1.34303	0.344982	0.716393	Down
lnc-MSTRG.8364.2	0.24	0.593333	1.30581	0.345385	0.716815	Up
lnc-MSTRG.20098.3	1.06	1.70667	0.687117	0.346018	0.71733	No
lnc-MSTRG.18248.2	0.573333	1.08667	0.922463	0.346035	0.71733	No
lnc-MSTRG.1194.1	0.0166667	0.183333	3.45943	0.346373	0.717616	Up
lnc-MSTRG.17982.1	20.8367	15.9167	-0.388586	0.347416	0.719142	No
lnc-MSTRG.19530.4	10.3833	8.20667	-0.339401	0.347512	0.719142	No
lnc-MSTRG.151.1	2.6	1.66	-0.647328	0.34783	0.719385	No
lnc-MSTRG.2308.1	3.95333	5.92333	0.58334	0.348141	0.719611	No
lnc-MSTRG.34423.2	0.36	0.786667	1.12776	0.348566	0.719956	Up
lnc-MSTRG.9553.1	0.59	1.12	0.924712	0.34885	0.719956	No
lnc-MSTRG.15118.1	0.7	1.48333	1.08342	0.349029	0.719956	Up
lnc-MSTRG.15682.1	0.51	1.07	1.06904	0.349112	0.719956	Up
lnc-MSTRG.6746.1	0.0833333	0.383333	2.20163	0.349571	0.720422	Up
lnc-MSTRG.10331.2	0.226667	1.05667	2.22088	0.349935	0.720422	Up
lnc-MSTRG.16172.1	0.176667	0.43	1.28331	0.349942	0.720422	Up
lnc-MSTRG.4287.1	0.0233333	0.163333	2.80735	0.351108	0.722079	Up
lnc-MSTRG.5234.2	0.903333	1.39667	0.628657	0.351151	0.722079	No
lnc-MSTRG.30272.1	0.0466667	0.306667	2.71621	0.351895	0.722358	Up
lnc-MSTRG.21537.1	11.0567	16.1067	0.542741	0.352	0.722358	No
lnc-MSTRG.593.1	0.93	1.51	0.699246	0.352042	0.722358	No
lnc-MSTRG.20620.1	0.02	0.14	2.80735	0.352094	0.722358	Up
lnc-MSTRG.18791.1	0.001	0.0933333	6.54432	0.353041	0.723696	Up
lnc-MSTRG.10359.1	0.001	0.0666667	6.05889	0.353434	0.723696	Up
lnc-MSTRG.21428.2	0.21	0.001	-7.71425	0.35359	0.723696	Down
lnc-MSTRG.21725.3	3.03333	2.34333	-0.372342	0.353861	0.723696	No
lnc-MSTRG.24447.2	2.36	1.88333	-0.325498	0.353864	0.723696	No
lnc-MSTRG.9006.1	0.546667	0.173333	-1.65711	0.354111	0.723696	Down
lnc-MSTRG.30883.1	0.526667	0.2	-1.39689	0.354162	0.723696	Down
lnc-MSTRG.18913.3	1.06333	0.716667	-0.56922	0.355407	0.725826	No
lnc-MSTRG.30709.1	0.001	0.43	8.74819	0.355987	0.726596	Up
lnc-MSTRG.5711.1	0.14	0.4	1.51457	0.356533	0.727296	Up
lnc-MSTRG.30231.1	0.04	0.36	3.16993	0.357634	0.729126	Up
lnc-MSTRG.22078.1	0.61	1.20667	0.984146	0.358167	0.729796	No
lnc-MSTRG.12682.1	0.001	0.63	9.29921	0.358825	0.730176	Up
lnc-MSTRG.14227.1	0.001	0.5	8.96578	0.358825	0.730176	Up
lnc-MSTRG.26785.1	0.233333	0.74	1.66513	0.358966	0.730176	Up
lnc-MSTRG.4388.1	0.001	0.176667	7.46489	0.362287	0.736198	Up
lnc-MSTRG.30930.1	0.04	0.496667	3.63421	0.362338	0.736198	Up
lnc-MSTRG.16221.2	0.953333	0.606667	-0.652077	0.362919	0.736838	No
lnc-MSTRG.28888.2	2.46333	2.01333	-0.291026	0.363064	0.736838	No
lnc-MSTRG.14136.2	4.18667	3.44333	-0.281996	0.363325	0.736858	No
lnc-MSTRG.25839.2	0.25	0.0333333	-2.90689	0.363487	0.736858	Down
lnc-MSTRG.4445.2	3.82	5.48333	0.521481	0.363911	0.737005	No
lnc-MSTRG.20896.1	0.103333	0.47	2.18536	0.364567	0.737005	Up
lnc-MSTRG.33559.1	1.45333	0.976667	-0.573427	0.364856	0.737005	No
lnc-MSTRG.4816.3	0.486667	0.226667	-1.10236	0.365137	0.737005	Down
lnc-MSTRG.17832.1	0.0566667	0.001	-5.82443	0.365183	0.737005	Down
lnc-MSTRG.9821.1	0.18	0.001	-7.49185	0.365183	0.737005	Down
lnc-MSTRG.21499.1	0.53	0.236667	-1.16314	0.365341	0.737005	Down
lnc-MSTRG.4799.1	0.98	2.34	1.25565	0.365351	0.737005	Up
lnc-MSTRG.11554.1	1.83	4.38	1.25909	0.365413	0.737005	Up
lnc-MSTRG.20340.1	0.493333	0.94	0.930098	0.365709	0.737186	No
lnc-MSTRG.20987.1	0.24	0.0633333	-1.922	0.366166	0.737309	Down
lnc-MSTRG.89.1	0.723333	1.28333	0.827163	0.366182	0.737309	No
lnc-MSTRG.29710.3	1.22333	0.61	-1.00394	0.366666	0.737868	Down
lnc-MSTRG.7787.1	0.816667	1.32	0.692719	0.367107	0.738103	No
lnc-MSTRG.12746.2	0.976667	1.80667	0.887392	0.367299	0.738103	No
lnc-MSTRG.27578.1	1.45667	1.01	-0.528315	0.367401	0.738103	No
lnc-MSTRG.19.1	0.293333	0.766667	1.38606	0.368073	0.738355	Up
lnc-MSTRG.16128.2	2.09333	3.53667	0.756588	0.368203	0.738355	No
lnc-MSTRG.29888.1	0.593333	0.1	-2.56884	0.368249	0.738355	Down
lnc-MSTRG.2655.2	9.17667	6.15333	-0.576602	0.368522	0.738355	No
lnc-MSTRG.18206.1	1.99	0.32	-2.63662	0.368558	0.738355	Down
lnc-MSTRG.5948.1	0.113333	0.001	-6.82443	0.368878	0.738424	Down
lnc-MSTRG.24356.1	0.426667	0.196667	-1.11736	0.369281	0.738424	Down
lnc-MSTRG.23628.1	10.02	5.52	-0.860142	0.369535	0.738424	No
lnc-MSTRG.19084.1	2.74333	1.21	-1.18092	0.369545	0.738424	Down
lnc-MSTRG.7798.3	2.83667	2.32667	-0.285932	0.369821	0.738424	No
lnc-MSTRG.23138.1	0.001	0.213333	7.73697	0.370046	0.738424	Up
lnc-MSTRG.8396.2	0.166667	0.433333	1.37851	0.370194	0.738424	Up
lnc-MSTRG.32809.3	3.57667	3.05667	-0.226656	0.370244	0.738424	No
lnc-MSTRG.28835.1	1.06	0.69	-0.619396	0.371136	0.739466	No
lnc-MSTRG.31418.1	0.186667	0.706667	1.92057	0.371298	0.739466	Up
lnc-MSTRG.11275.1	0.57	1.11	0.961526	0.371455	0.739466	No
lnc-MSTRG.19044.1	0.306667	0.0533333	-2.52356	0.372094	0.739466	Down
lnc-MSTRG.27796.3	0.99	0.573333	-0.788054	0.37212	0.739466	No
lnc-MSTRG.30116.3	7.51333	6.33333	-0.246488	0.372321	0.739466	No
lnc-MSTRG.18019.3	0.176667	0.001	-7.46489	0.372487	0.739466	Down
lnc-MSTRG.23657.1	0.15	0.693333	2.20859	0.372694	0.739466	Up
lnc-MSTRG.25421.3	0.5	0.893333	0.83727	0.372724	0.739466	No
lnc-MSTRG.9175.1	0.0466667	0.506667	3.44057	0.373105	0.739466	Up
lnc-MSTRG.4509.2	1.51667	1.02667	-0.562936	0.373198	0.739466	No
lnc-MSTRG.30408.1	0.0633333	0.453333	2.83954	0.373767	0.739466	Up
lnc-MSTRG.4347.4	0.983333	1.71333	0.801053	0.373891	0.739466	No
lnc-MSTRG.30966.1	0.243333	0.001	-7.92679	0.374205	0.739466	Down
lnc-MSTRG.8462.1	0.223333	0.763333	1.77311	0.374319	0.739466	Up
lnc-MSTRG.25424.1	0.563333	1.33	1.23937	0.374383	0.739466	Up
lnc-MSTRG.3597.1	0.001	0.143333	7.16323	0.374383	0.739466	Up
lnc-MSTRG.13010.1	0.001	0.36	8.49185	0.374648	0.739466	Up
lnc-MSTRG.8289.1	0.556667	0.27	-1.04385	0.374693	0.739466	Down
lnc-MSTRG.15540.1	0.366667	0.0333333	-3.45943	0.375303	0.740013	Down
lnc-MSTRG.2414.1	0.613333	0.326667	-0.908852	0.375393	0.740013	No
lnc-MSTRG.31658.1	35.45	51.29	0.532892	0.375591	0.740013	No
lnc-MSTRG.16860.1	0.593333	1.07333	0.855183	0.377326	0.742978	No
lnc-MSTRG.19698.3	0.86	0.266667	-1.6893	0.377511	0.742978	Down
lnc-MSTRG.27600.1	0.001	0.45	8.81378	0.377757	0.743036	Up
lnc-MSTRG.8519.2	0.07	0.376667	2.42786	0.377956	0.743036	Up
lnc-MSTRG.28559.1	0.001	0.49	8.93664	0.378279	0.743264	Up
lnc-MSTRG.24182.2	0.001	0.0733333	6.1964	0.37849	0.74327	Up
lnc-MSTRG.165.1	0.726667	0.42	-0.790904	0.379988	0.745802	No
lnc-MSTRG.5013.1	0.126667	0.0433333	-1.54749	0.381153	0.746252	Down
lnc-MSTRG.26055.1	0.001	0.326667	8.35168	0.381218	0.746252	Up
lnc-MSTRG.18894.1	1.51667	0.886667	-0.77444	0.38126	0.746252	No
lnc-MSTRG.32010.1	6.62667	10.34	0.641881	0.381345	0.746252	No
lnc-MSTRG.17959.1	3.73	5.19	0.476559	0.381588	0.746252	No
lnc-MSTRG.25022.1	1.56	2.88333	0.886192	0.381869	0.746252	No
lnc-MSTRG.16003.1	0.001	0.21	7.71425	0.381884	0.746252	Up
lnc-MSTRG.33965.1	0.04	0.366667	3.1964	0.382022	0.746252	Up
lnc-MSTRG.14710.1	0.31	0.59	0.928447	0.382094	0.746252	No
lnc-MSTRG.19141.1	1.29	2.59	1.00558	0.382895	0.746834	Up
lnc-MSTRG.25487.4	0.27	0.603333	1.16	0.383145	0.746834	Up
lnc-MSTRG.6373.1	3.63	1.56	-1.21842	0.383354	0.746834	Down
lnc-MSTRG.22896.1	2.07667	3.21333	0.629801	0.383404	0.746834	No
lnc-MSTRG.26283.1	0.34	0.133333	-1.3505	0.383444	0.746834	Down
lnc-MSTRG.8395.1	0.09	0.32	1.83007	0.383645	0.746834	Up
lnc-MSTRG.14545.1	0.166667	0.57	1.774	0.385406	0.749854	Up
lnc-MSTRG.19645.1	0.001	0.22	7.78136	0.386192	0.750646	Up
lnc-MSTRG.21841.3	0.02	0.183333	3.1964	0.386232	0.750646	Up
lnc-MSTRG.5383.1	0.723333	0.343333	-1.07505	0.386838	0.751415	Down
lnc-MSTRG.24116.1	0.84	1.6	0.929611	0.387786	0.75247	No
lnc-MSTRG.24699.1	5.78333	2.33333	-1.30951	0.388097	0.75247	Down
lnc-MSTRG.31278.1	26.3133	40.4333	0.619751	0.388202	0.75247	No
lnc-MSTRG.26239.5	0.56	0.36	-0.63743	0.388355	0.75247	No
lnc-MSTRG.15357.1	0.64	1.35	1.07682	0.388498	0.75247	Up
lnc-MSTRG.34259.1	2.25333	1.70667	-0.400879	0.38893	0.75247	No
lnc-MSTRG.27830.1	0.823333	0.46	-0.839843	0.388938	0.75247	No
lnc-MSTRG.15180.1	0.001	0.433333	8.75933	0.389274	0.75247	Up
lnc-MSTRG.8598.1	0.001	0.61	9.25267	0.389274	0.75247	Up
lnc-MSTRG.25484.1	0.001	0.57	9.15482	0.3906	0.754625	Up
lnc-MSTRG.16028.1	1.18333	0.703333	-0.750576	0.390944	0.754882	No
lnc-MSTRG.18445.1	0.0866667	0.001	-6.43741	0.391318	0.754914	Down
lnc-MSTRG.6668.1	0.416667	0.176667	-1.23786	0.391382	0.754914	Down
lnc-MSTRG.23059.1	0.03	0.18	2.58496	0.393437	0.757973	Up
lnc-MSTRG.908.3	7.4	6.19333	-0.256809	0.393513	0.757973	No
lnc-MSTRG.13294.1	0.0133333	0.0733333	2.45943	0.393603	0.757973	Up
lnc-MSTRG.6358.3	0.553333	1.83	1.72562	0.394257	0.758824	Up
lnc-MSTRG.10964.1	0.02	0.126667	2.66297	0.39529	0.760403	Up
lnc-MSTRG.10845.2	0.656667	1.32333	1.01094	0.395765	0.760906	Up
lnc-MSTRG.18826.1	0.41	0.923333	1.17123	0.397046	0.762246	Up
lnc-MSTRG.18824.1	4.58	3.07	-0.577109	0.397224	0.762246	No
lnc-MSTRG.14379.1	0.373333	0.153333	-1.28379	0.397274	0.762246	Down
lnc-MSTRG.32466.4	1.77667	0.743333	-1.25709	0.397387	0.762246	Down
lnc-MSTRG.17968.1	0.07	0.21	1.58496	0.397699	0.762246	Up
lnc-MSTRG.30877.1	0.656667	1.31667	1.00366	0.39774	0.762246	Up
lnc-MSTRG.12617.1	0.776667	0.2	-1.9573	0.398227	0.762565	Down
lnc-MSTRG.17960.1	0.223333	0.0633333	-1.81816	0.398668	0.762565	Down
lnc-MSTRG.30624.1	0.293333	0.79	1.42931	0.399018	0.762565	Up
lnc-MSTRG.25260.1	0.166667	0.0233333	-2.8365	0.399133	0.762565	Down
lnc-MSTRG.15625.1	0.596667	1.57333	1.39883	0.399331	0.762565	Up
lnc-MSTRG.1007.1	0.001	0.473333	8.88671	0.399398	0.762565	Up
lnc-MSTRG.12656.1	0.001	0.376667	8.55714	0.399398	0.762565	Up
lnc-MSTRG.22163.1	0.123333	0.67	2.4416	0.399655	0.762639	Up
lnc-MSTRG.12451.1	0.883333	0.59	-0.582243	0.399863	0.762639	No
lnc-MSTRG.4342.1	0.0566667	0.706667	3.64046	0.400409	0.763273	Up
lnc-MSTRG.7176.1	0.173333	0.623333	1.84645	0.401252	0.764014	Up
lnc-MSTRG.11618.1	0.83	1.73667	1.06514	0.401366	0.764014	Up
lnc-MSTRG.24188.1	0.393333	0.92	1.22588	0.401438	0.764014	Up
lnc-MSTRG.20282.3	0.353333	0.613333	0.795642	0.402044	0.764761	No
lnc-MSTRG.24202.2	0.51	1.09667	1.10456	0.402532	0.765048	Up
lnc-MSTRG.31907.1	0.54	1.05667	0.968489	0.402623	0.765048	No
lnc-MSTRG.23290.1	0.001	0.266667	8.05889	0.403933	0.767129	Up
lnc-MSTRG.27884.1	0.173333	0.001	-7.43741	0.40622	0.770327	Down
lnc-MSTRG.33098.3	0.26	0.001	-8.02237	0.40622	0.770327	Down
lnc-MSTRG.24913.3	0.643333	1.22667	0.931105	0.406263	0.770327	No
lnc-MSTRG.32946.1	0.19	0.756667	1.99366	0.406758	0.770857	Up
lnc-MSTRG.3424.1	0.793333	1.49667	0.915754	0.407856	0.772228	No
lnc-MSTRG.15121.1	0.663333	0.306667	-1.11306	0.407913	0.772228	Down
lnc-MSTRG.31983.1	0.41	0.0933333	-2.13516	0.408626	0.772815	Down
lnc-MSTRG.28373.1	13.64	18.9267	0.472577	0.408954	0.772815	No
lnc-MSTRG.11594.1	0.001	0.44	8.78136	0.409087	0.772815	Up
lnc-MSTRG.32900.2	0.001	0.183333	7.51833	0.409087	0.772815	Up
lnc-MSTRG.22120.1	0.65	0.393333	-0.724687	0.409712	0.773348	No
lnc-MSTRG.10849.1	0.476667	0.226667	-1.07241	0.409846	0.773348	Down
lnc-MSTRG.1263.2	1.15667	0.826667	-0.484596	0.410192	0.773348	No
lnc-MSTRG.28314.1	0.001	0.343333	8.42347	0.410233	0.773348	Up
lnc-MSTRG.18574.1	0.593333	1.10333	0.894954	0.410874	0.773868	No
lnc-MSTRG.26708.1	1.70333	3.08	0.85457	0.411473	0.773868	No
lnc-MSTRG.17380.1	0.22	0.001	-7.78136	0.41159	0.773868	Down
lnc-MSTRG.3581.1	0.156667	0.001	-7.29155	0.41159	0.773868	Down
lnc-MSTRG.3787.3	0.06	0.001	-5.90689	0.41159	0.773868	Down
lnc-MSTRG.10198.1	0.773333	1.22333	0.661655	0.412592	0.774816	No
lnc-MSTRG.33668.1	0.106667	0.326667	1.61471	0.412631	0.774816	Up
lnc-MSTRG.18097.1	2.63	1.91	-0.46149	0.412934	0.774816	No
lnc-MSTRG.21654.1	58.06	50.5367	-0.200214	0.41302	0.774816	No
lnc-MSTRG.31556.1	3.72333	6.71	0.849718	0.413372	0.774816	No
lnc-MSTRG.9350.1	0.0833333	0.476667	2.51602	0.413441	0.774816	Up
lnc-MSTRG.5774.1	2.09667	1.30667	-0.682206	0.413674	0.774816	No
lnc-MSTRG.9632.2	2.42667	5.35333	1.14146	0.413966	0.774816	Up
lnc-MSTRG.5404.1	0.001	0.153333	7.26053	0.414246	0.774816	Up
lnc-MSTRG.9349.1	1.1	2.56667	1.22239	0.41426	0.774816	Up
lnc-MSTRG.16441.1	0.49	1.04333	1.09035	0.41474	0.775308	Up
lnc-MSTRG.6191.2	0.21	0.136667	-0.619728	0.415408	0.776152	No
lnc-MSTRG.11323.1	0.366667	0.626667	0.773229	0.417085	0.77666	No
lnc-MSTRG.8488.1	0.98	2.17333	1.14906	0.417246	0.77666	Up
lnc-MSTRG.4133.1	0.001	0.08	6.32193	0.417305	0.77666	Up
lnc-MSTRG.20462.1	2.20667	1.7	-0.376334	0.417396	0.77666	No
lnc-MSTRG.33267.2	0.27	0.146667	-0.880418	0.417728	0.77666	No
lnc-MSTRG.11641.1	0.03	0.14	2.22239	0.418179	0.77666	Up
lnc-MSTRG.17602.1	0.166667	0.001	-7.38082	0.418305	0.77666	Down
lnc-MSTRG.28636.1	0.283333	0.001	-8.14636	0.418305	0.77666	Down
lnc-MSTRG.28657.1	0.226667	0.001	-7.82443	0.418305	0.77666	Down
lnc-MSTRG.5354.1	0.28	0.001	-8.12928	0.418305	0.77666	Down
lnc-MSTRG.32486.1	0.243333	0.543333	1.1589	0.418704	0.77666	Up
lnc-MSTRG.12211.1	0.001	0.253333	7.98489	0.419165	0.77666	Up
lnc-MSTRG.17269.3	0.88	3.06333	1.79953	0.419172	0.77666	Up
lnc-MSTRG.17269.4	0.88	3.06333	1.79953	0.419172	0.77666	Up
lnc-MSTRG.26291.1	0.001	0.0733333	6.1964	0.419198	0.77666	Up
lnc-MSTRG.32039.1	0.001	0.3	8.22882	0.41933	0.77666	Up
lnc-MSTRG.9368.2	2.70333	2.21667	-0.286348	0.419371	0.77666	No
lnc-MSTRG.28671.1	0.336667	0.226667	-0.570749	0.419588	0.77666	No
lnc-MSTRG.6728.1	1.32	2.46667	0.902025	0.420474	0.777894	No
lnc-MSTRG.23396.1	1.01333	1.48	0.546488	0.420859	0.777894	No
lnc-MSTRG.5697.1	1.10333	1.66	0.589315	0.421128	0.777894	No
lnc-MSTRG.11167.1	1.62667	1.25667	-0.372317	0.421315	0.777894	No
lnc-MSTRG.7235.2	1.09	1.89333	0.7966	0.421341	0.777894	No
lnc-MSTRG.3597.2	0.393333	0.266667	-0.560715	0.421929	0.778578	No
lnc-MSTRG.11042.1	0.143333	0.0266667	-2.42626	0.423598	0.781255	Down
lnc-MSTRG.730.1	5.74333	5.23333	-0.134158	0.424441	0.781921	No
lnc-MSTRG.34397.1	0.146667	0.416667	1.50635	0.424573	0.781921	Up
lnc-MSTRG.21023.2	1.84333	1.59	-0.21329	0.424615	0.781921	No
lnc-MSTRG.16987.1	0.42	0.136667	-1.61973	0.425632	0.78339	Down
lnc-MSTRG.8364.1	0.303333	0.663333	1.12883	0.426057	0.78357	Up
lnc-MSTRG.6559.1	1.24	0.956667	-0.374252	0.426443	0.78357	No
lnc-MSTRG.23713.2	0.533333	0.85	0.672425	0.426552	0.78357	No
lnc-MSTRG.24061.2	7.72667	6.38333	-0.275536	0.426605	0.78357	No
lnc-MSTRG.20150.1	0.696667	0.17	-2.03493	0.427106	0.784086	Down
lnc-MSTRG.30880.1	0.23	0.656667	1.51353	0.427897	0.784895	Up
lnc-MSTRG.24767.1	0.916667	0.63	-0.541045	0.428137	0.784895	No
lnc-MSTRG.7178.1	0.503333	0.936667	0.896022	0.428277	0.784895	No
lnc-MSTRG.21543.1	0.001	0.143333	7.16323	0.428424	0.784895	Up
lnc-MSTRG.31628.1	0.001	0.436667	8.77039	0.428814	0.784907	Up
lnc-MSTRG.29028.3	1.21333	0.793333	-0.612977	0.428869	0.784907	No
lnc-MSTRG.21687.1	0.683333	1.28667	0.912977	0.429301	0.785297	No
lnc-MSTRG.30208.1	1.54667	0.783333	-0.981464	0.429666	0.785563	No
lnc-MSTRG.30053.1	0.31	0.143333	-1.11289	0.431251	0.787619	Down
lnc-MSTRG.17780.1	0.68	2.11667	1.63819	0.431632	0.787619	Up
lnc-MSTRG.33556.1	0.001	0.496667	8.95613	0.431671	0.787619	Up
lnc-MSTRG.5561.2	0.001	0.3	8.22882	0.431671	0.787619	Up
lnc-MSTRG.32180.1	0.433333	1.03333	1.25376	0.432287	0.788336	Up
lnc-MSTRG.13554.1	0.05	0.17	1.76553	0.43262	0.788336	Up
lnc-MSTRG.19667.2	0.566667	0.946667	0.740356	0.432831	0.788336	No
lnc-MSTRG.10076.1	2.66	4.60333	0.791253	0.432946	0.788336	No
lnc-MSTRG.8852.2	0.193333	0.336667	0.80023	0.433904	0.78932	No
lnc-MSTRG.5026.1	2.86333	2.32667	-0.299431	0.433928	0.78932	No
lnc-MSTRG.23372.1	0.173333	0.001	-7.43741	0.43491	0.789502	Down
lnc-MSTRG.30713.1	0.143333	0.001	-7.16323	0.43491	0.789502	Down
lnc-MSTRG.4848.1	0.163333	0.001	-7.35168	0.43491	0.789502	Down
lnc-MSTRG.6979.1	0.12	0.001	-6.90689	0.43491	0.789502	Down
lnc-MSTRG.8511.1	0.793333	2.02	1.34836	0.435544	0.78989	Up
lnc-MSTRG.29439.1	0.87	0.49	-0.828234	0.436057	0.78989	No
lnc-MSTRG.27838.1	0.34	0.776667	1.19176	0.43638	0.78989	Up
lnc-MSTRG.23875.1	0.0266667	0.106667	2	0.436459	0.78989	Up
lnc-MSTRG.19954.1	0.4	0.0866667	-2.20645	0.436459	0.78989	Down
lnc-MSTRG.18128.1	4.84667	7.01333	0.533107	0.43646	0.78989	No
lnc-MSTRG.9788.1	0.113333	0.333333	1.55639	0.436669	0.78989	Up
lnc-MSTRG.27066.1	0.47	0.23	-1.03103	0.437858	0.791598	Down
lnc-MSTRG.22783.2	0.326667	0.763333	1.22449	0.43809	0.791598	Up
lnc-MSTRG.26311.1	0.89	0.596667	-0.57688	0.438277	0.791598	No
lnc-MSTRG.27663.1	0.343333	1.75333	2.35242	0.438557	0.791704	Up
lnc-MSTRG.566.1	0.53	1.24	1.22628	0.438994	0.792093	Up
lnc-MSTRG.24988.2	0.206667	0.0566667	-1.86673	0.439665	0.792824	Down
lnc-MSTRG.5691.2	0.446667	0.876667	0.97283	0.439842	0.792824	No
lnc-MSTRG.8617.1	0.17	0.53	1.64046	0.440739	0.79404	Up
lnc-MSTRG.9679.1	0.5	0.263333	-0.925038	0.440998	0.794108	No
lnc-MSTRG.34466.1	1.02333	2.03	0.988204	0.441513	0.794635	No
lnc-MSTRG.23053.1	0.493333	0.906667	0.878009	0.442311	0.79567	No
lnc-MSTRG.6703.1	0.556667	0.286667	-0.95744	0.444091	0.798471	No
lnc-MSTRG.28379.1	0.001	0.296667	8.2127	0.445035	0.798963	Up
lnc-MSTRG.28549.1	0.001	0.303333	8.24476	0.445035	0.798963	Up
lnc-MSTRG.30216.2	0.001	0.15	7.22882	0.445035	0.798963	Up
lnc-MSTRG.4778.1	0.473333	0.933333	0.979536	0.445399	0.799178	No
lnc-MSTRG.19737.1	0.423333	0.936667	1.14574	0.445754	0.799178	Up
lnc-MSTRG.33441.1	1.13333	0.623333	-0.862496	0.445824	0.799178	No
lnc-MSTRG.11709.1	1.18667	0.896667	-0.404271	0.446244	0.799443	No
lnc-MSTRG.7175.1	1.28667	1.02	-0.335069	0.44647	0.799443	No
[truncated: 1,957 more rows]

## Sheet: Table S3
Differentially expressed mRNAs in McIII vs McI
LncRNAid	McaI_mean	McaIII_mean	log2(FC)	PValue	FDR	significant
lnc-MSTRG.9681.2	0.07	59.9333	9.74179	4.46072e-48	1.6924e-44	Up
lnc-MSTRG.24692.3	37.6167	2.05667	-4.19299	2.22963e-40	4.22961e-37	Down
lnc-MSTRG.21529.3	16.3767	0.426667	-5.26239	2.91961e-39	3.69234e-36	Down
lnc-MSTRG.13550.1	2495.99	35.9833	-6.11614	1.75863e-29	1.66806e-26	Down
lnc-MSTRG.32062.1	3345	6.66667	-8.97083	5.69907e-28	4.32445e-25	Down
lnc-MSTRG.28125.1	1033.56	13.1567	-6.29569	5.94183e-27	3.75721e-24	Down
lnc-MSTRG.26151.1	4.97667	0.11	-5.4996	3.906e-26	2.11705e-23	Down
lnc-MSTRG.16441.1	0.49	29.1433	5.89424	3.20905e-25	1.52189e-22	Up
lnc-MSTRG.19189.1	46.5967	0.756667	-5.94443	2.60148e-24	1.09667e-21	Down
lnc-MSTRG.17348.1	34.34	0.223333	-7.26455	3.74651e-24	1.42143e-21	Down
lnc-MSTRG.15692.1	1.25333	121.03	6.59345	8.09499e-24	2.79204e-21	Up
lnc-MSTRG.9681.1	0.0133333	19.6933	10.5285	1.65811e-23	5.24239e-21	Up
lnc-MSTRG.34191.1	230.583	1.79	-7.00918	1.84978e-23	5.39852e-21	Down
lnc-MSTRG.31658.1	35.45	0.873333	-5.34311	1.11246e-22	3.01475e-20	Down
lnc-MSTRG.32134.1	57.0767	7.60667	-2.90756	5.08935e-22	1.28727e-19	Down
lnc-MSTRG.16408.1	316.287	0.283333	-10.1245	1.17175e-21	2.77852e-19	Down
lnc-MSTRG.5788.1	13.3567	0.26	-5.6829	2.62879e-20	5.86684e-18	Down
lnc-MSTRG.19838.1	32029.1	336.233	-6.57378	1.28539e-19	2.62253e-17	Down
lnc-MSTRG.5459.1	6.97333	0.423333	-4.04198	1.31334e-19	2.62253e-17	Down
lnc-MSTRG.11965.1	38.9467	2.47	-3.97892	2.62384e-19	4.97742e-17	Down
lnc-MSTRG.4086.1	16.2233	0.0433333	-8.54838	3.3286e-19	6.01366e-17	Down
lnc-MSTRG.15268.2	1.62	41.3233	4.67289	2.158e-18	3.72158e-16	Up
lnc-MSTRG.21529.2	18.7567	0.001	-14.1951	3.15695e-18	5.2076e-16	Down
lnc-MSTRG.5708.2	23.04	0.0966667	-7.89691	4.93017e-18	7.79377e-16	Down
lnc-MSTRG.22429.1	0.276667	103.667	8.54959	1.05397e-17	1.59951e-15	Up
lnc-MSTRG.19077.3	0.0333333	5.76	7.43296	2.54646e-17	3.71587e-15	Up
lnc-MSTRG.15156.1	10.8267	0.001	-13.4023	9.06933e-17	1.27441e-14	Down
lnc-MSTRG.23223.3	4.77	0.183333	-4.70145	9.98671e-17	1.3532e-14	Down
lnc-MSTRG.10246.1	15.7067	0.00666667	-11.2021	1.4383e-16	1.8817e-14	Down
lnc-MSTRG.20412.1	1.11333	20.52	4.20407	2.08696e-16	2.63931e-14	Up
lnc-MSTRG.9679.2	44.5333	3.92333	-3.50473	2.64753e-16	3.14093e-14	Down
lnc-MSTRG.25316.2	14.4767	0.08	-7.49951	2.64918e-16	3.14093e-14	Down
lnc-MSTRG.4481.1	301.703	0.001	-18.2028	3.21827e-16	3.70003e-14	Down
lnc-MSTRG.122.1	0.223333	28.93	7.01722	3.6574e-16	4.08122e-14	Up
lnc-MSTRG.26064.1	0.723333	29.1733	5.33385	3.97116e-16	4.30474e-14	Up
lnc-MSTRG.10166.3	18.6733	0.306667	-5.92816	9.96727e-16	1.05044e-13	Down
lnc-MSTRG.10939.1	0.263333	21.3833	6.34345	1.56821e-15	1.60805e-13	Up
lnc-MSTRG.24638.1	15.97	0.223333	-6.16002	1.62233e-15	1.61977e-13	Down
lnc-MSTRG.21520.1	10.0367	0.596667	-4.07221	4.32207e-15	4.20459e-13	Down
lnc-MSTRG.22082.2	6.43	0.001	-12.6506	7.73781e-15	7.33931e-13	Down
lnc-MSTRG.23332.1	9.9	0.0966667	-6.67827	8.38146e-15	7.5907e-13	Down
lnc-MSTRG.22468.1	0.001	7.59333	12.8905	8.40299e-15	7.5907e-13	Up
lnc-MSTRG.11771.1	0.156667	4.56667	4.86537	1.15079e-14	1.01537e-12	Up
lnc-MSTRG.11126.1	0.0233333	10.0867	8.75584	1.21181e-14	1.04491e-12	Up
lnc-MSTRG.21020.1	407.49	20.4367	-4.31753	1.57029e-14	1.32393e-12	Down
lnc-MSTRG.12746.2	0.976667	13.08	3.74335	2.73944e-14	2.22341e-12	Up
lnc-MSTRG.24692.4	13.1067	0.586667	-4.48162	2.75435e-14	2.22341e-12	Down
lnc-MSTRG.16033.1	8.72667	0.37	-4.55983	5.61997e-14	4.44212e-12	Down
lnc-MSTRG.24639.1	4.30333	0.173333	-4.63383	1.08088e-13	8.36907e-12	Down
lnc-MSTRG.2406.4	14.4033	0.14	-6.68483	1.10717e-13	8.4012e-12	Down
lnc-MSTRG.15963.1	32.4433	2.74333	-3.56392	1.29495e-13	9.63338e-12	Down
lnc-MSTRG.1947.1	14.02	0.14	-6.64592	1.79134e-13	1.30699e-11	Down
lnc-MSTRG.32422.1	0.001	28.42	14.7946	2.18248e-13	1.56232e-11	Up
lnc-MSTRG.27585.3	6.22667	44.7333	2.84482	2.62349e-13	1.84324e-11	Up
lnc-MSTRG.34597.1	36.1	0.666667	-5.75889	3.20883e-13	2.21351e-11	Down
lnc-MSTRG.34519.1	0.19	24.9567	7.03728	4.13552e-13	2.80182e-11	Up
lnc-MSTRG.18545.1	10.0833	0.001	-13.2997	4.57576e-13	3.04569e-11	Down
lnc-MSTRG.30526.3	0.001	12.7233	13.6352	5.04132e-13	3.25291e-11	Up
lnc-MSTRG.1451.1	0.843333	16.64	4.30241	5.05856e-13	3.25291e-11	Up
lnc-MSTRG.30313.1	0.27	39.4833	7.19214	1.00541e-12	6.35754e-11	Up
lnc-MSTRG.16112.1	0.001	7.39667	12.8527	1.03147e-12	6.41538e-11	Up
lnc-MSTRG.2403.1	2.77667	0.36	-2.94729	1.30111e-12	7.96197e-11	Down
lnc-MSTRG.32084.1	0.196667	6.83	5.11806	1.55853e-12	9.38579e-11	Up
lnc-MSTRG.30355.1	0.001	13.39	13.7089	1.70522e-12	1.01088e-10	Up
lnc-MSTRG.34172.1	12.63	0.001	-13.6246	2.98488e-12	1.74225e-10	Down
lnc-MSTRG.4660.2	5.02667	0.0833333	-5.91456	4.05696e-12	2.33214e-10	Down
lnc-MSTRG.25316.1	6.04	0.001	-12.5603	4.57758e-12	2.59214e-10	Down
lnc-MSTRG.14269.1	0.03	5.29333	7.46307	4.67268e-12	2.60708e-10	Up
lnc-MSTRG.5878.1	0.001	9.74667	13.2507	5.04311e-12	2.77298e-10	Up
lnc-MSTRG.4891.1	12.57	0.02	-9.29577	5.74104e-12	3.11164e-10	Down
lnc-MSTRG.20546.1	0.001	12.9267	13.6581	5.85e-12	3.12604e-10	Up
lnc-MSTRG.33493.1	0.0466667	21.6133	8.85531	7.81056e-12	4.11207e-10	Up
lnc-MSTRG.29028.5	0.12	3.38	4.81592	7.93854e-12	4.11207e-10	Up
lnc-MSTRG.31244.1	0.01	5.80333	9.18074	8.02038e-12	4.11207e-10	Up
lnc-MSTRG.8235.1	0.0366667	10.35	8.14095	8.14784e-12	4.12172e-10	Up
lnc-MSTRG.13612.3	0.07	4.19333	5.9046	8.85992e-12	4.42296e-10	Up
lnc-MSTRG.12262.1	1.94	0.001	-10.9218	1.19126e-11	5.86966e-10	Down
lnc-MSTRG.6694.1	10.33	0.403333	-4.67872	1.40383e-11	6.82837e-10	Down
lnc-MSTRG.30471.1	4.55667	0.001	-12.1538	1.44477e-11	6.93856e-10	Down
lnc-MSTRG.24961.1	77.4	3.01667	-4.68131	1.5467e-11	7.33521e-10	Down
lnc-MSTRG.942.1	13.8367	1.50333	-3.20226	1.58034e-11	7.35399e-10	Down
lnc-MSTRG.24133.1	4.39667	28.91	2.71709	1.58942e-11	7.35399e-10	Up
lnc-MSTRG.15502.1	4.27667	0.001	-12.0623	1.65591e-11	7.56929e-10	Down
lnc-MSTRG.14710.1	0.31	4.40667	3.82935	1.96025e-11	8.85379e-10	Up
lnc-MSTRG.26281.1	15.1767	0.926667	-4.03366	2.2869e-11	1.02077e-09	Down
lnc-MSTRG.22148.1	8.85667	0.04	-7.79062	2.66471e-11	1.17557e-09	Down
lnc-MSTRG.34400.1	229.407	9.04667	-4.66438	2.79228e-11	1.21769e-09	Down
lnc-MSTRG.32773.2	0.15	4.36333	4.8624	2.96458e-11	1.27814e-09	Up
lnc-MSTRG.14236.1	1.52667	18.2767	3.58155	3.42673e-11	1.46032e-09	Up
lnc-MSTRG.2427.2	3.89333	0.001	-11.9268	3.46413e-11	1.46032e-09	Down
lnc-MSTRG.30768.1	5.33667	0.453333	-3.55729	3.78007e-11	1.56691e-09	Down
lnc-MSTRG.29747.1	6.9	0.866667	-2.99305	3.79957e-11	1.56691e-09	Down
lnc-MSTRG.3761.1	3.31	0.16	-4.37069	4.5195e-11	1.84376e-09	Down
lnc-MSTRG.13615.1	7.84667	0.0133333	-9.2009	5.30813e-11	2.14245e-09	Down
lnc-MSTRG.18447.1	4.46667	0.623333	-2.84112	5.67327e-11	2.26572e-09	Down
lnc-MSTRG.21987.1	4.1	0.001	-12.0014	5.81686e-11	2.29887e-09	Down
lnc-MSTRG.30135.1	2.12	0.001	-11.0498	6.31958e-11	2.4718e-09	Down
lnc-MSTRG.24407.1	0.9	13.55	3.91222	6.63667e-11	2.56606e-09	Up
lnc-MSTRG.5375.1	2.37333	13.8567	2.54559	6.69584e-11	2.56606e-09	Up
lnc-MSTRG.4951.2	5.88333	0.596667	-3.30164	8.55685e-11	3.24647e-09	Down
lnc-MSTRG.13283.1	2.92333	0.001	-11.5134	1.27146e-10	4.77616e-09	Down
lnc-MSTRG.5026.1	2.86333	0.0333333	-6.42459	1.30204e-10	4.84308e-09	Down
lnc-MSTRG.27427.1	3.89667	0.001	-11.928	1.5697e-10	5.782e-09	Down
lnc-MSTRG.18791.1	0.001	4.16333	12.0235	1.671e-10	6.09594e-09	Up
lnc-MSTRG.5013.1	0.126667	9.13	6.17151	1.74886e-10	6.31923e-09	Up
lnc-MSTRG.18562.2	0.001	6.52667	12.6721	1.8344e-10	6.54946e-09	Up
lnc-MSTRG.14310.1	3.97667	0.001	-11.9573	1.84711e-10	6.54946e-09	Down
lnc-MSTRG.5659.1	4	0.001	-11.9658	1.88418e-10	6.61905e-09	Down
lnc-MSTRG.12906.1	0.001	4.04667	11.9825	1.98107e-10	6.86388e-09	Up
lnc-MSTRG.18996.1	1.88333	0.001	-10.8791	1.99006e-10	6.86388e-09	Down
lnc-MSTRG.13593.1	2.34	0.05	-5.54844	2.46072e-10	8.41079e-09	Down
lnc-MSTRG.8409.1	0.001	8.52667	13.0578	3.07348e-10	1.04114e-08	Up
lnc-MSTRG.21671.1	0.001	7.05667	12.7848	3.61741e-10	1.21455e-08	Up
lnc-MSTRG.7241.1	0.02	9.14	8.83605	4.63326e-10	1.54198e-08	Up
lnc-MSTRG.24988.1	0.836667	0.001	-9.70851	5.29105e-10	1.74559e-08	Down
lnc-MSTRG.15917.1	6.76	0.49	-3.78617	5.46339e-10	1.78691e-08	Down
lnc-MSTRG.24275.2	0.001	1.60667	10.6499	5.57955e-10	1.8093e-08	Up
lnc-MSTRG.10998.2	1.92	0.001	-10.9069	6.72834e-10	2.16333e-08	Down
lnc-MSTRG.2829.1	0.15	8.54	5.8312	7.06867e-10	2.25366e-08	Up
lnc-MSTRG.17569.3	2.90667	0.001	-11.5051	7.2545e-10	2.29363e-08	Down
lnc-MSTRG.6929.1	0.05	7.62333	7.25235	7.38859e-10	2.31672e-08	Up
lnc-MSTRG.30184.2	8.68	0.51	-4.08913	8.66784e-10	2.69556e-08	Down
lnc-MSTRG.26395.1	0.001	3.26667	11.6736	1.00251e-09	3.0923e-08	Up
lnc-MSTRG.30460.3	0.08	7.67667	6.58434	1.07769e-09	3.28412e-08	Up
lnc-MSTRG.18120.1	2.92	0.001	-11.5118	1.08201e-09	3.28412e-08	Down
lnc-MSTRG.26825.1	0.001	2.63333	11.3627	1.17156e-09	3.5277e-08	Up
lnc-MSTRG.10003.1	0.001	4.07667	11.9932	1.34829e-09	4.0279e-08	Up
lnc-MSTRG.3976.2	0.001	6.77333	12.7257	1.46419e-09	4.31288e-08	Up
lnc-MSTRG.32442.1	0.0666667	5.17	6.27705	1.46642e-09	4.31288e-08	Up
lnc-MSTRG.32809.2	0.78	0.001	-9.60733	1.54306e-09	4.50336e-08	Down
lnc-MSTRG.29717.1	25.4867	2.38667	-3.41667	1.58045e-09	4.57726e-08	Down
lnc-MSTRG.13712.1	5.78333	0.14	-5.3684	1.63647e-09	4.7036e-08	Down
lnc-MSTRG.24182.2	0.001	2.40667	11.2328	1.76636e-09	5.03877e-08	Up
lnc-MSTRG.26296.1	2.08333	0.18	-3.53282	1.82338e-09	5.1626e-08	Down
lnc-MSTRG.9750.1	1.47667	0.0166667	-6.46923	1.86112e-09	5.23043e-08	Down
lnc-MSTRG.33246.1	0.001	1.71333	10.7426	2.29651e-09	6.40658e-08	Up
lnc-MSTRG.23482.2	4.22333	0.001	-12.0442	2.56162e-09	7.094e-08	Down
lnc-MSTRG.28277.1	2.59333	0.001	-11.3406	2.80942e-09	7.72387e-08	Down
lnc-MSTRG.23834.1	0.213333	13.4	5.97298	2.87025e-09	7.83234e-08	Up
lnc-MSTRG.14185.1	0.02	6.63333	8.37359	2.89016e-09	7.83234e-08	Up
lnc-MSTRG.22341.1	2.21667	0.001	-11.1142	3.50335e-09	9.42369e-08	Down
lnc-MSTRG.13029.1	1.38667	0.001	-10.4374	3.52705e-09	9.42369e-08	Down
lnc-MSTRG.28165.1	1.96667	0.001	-10.9415	3.77752e-09	1.00223e-07	Down
lnc-MSTRG.34278.1	14.2467	1.15333	-3.62674	3.93843e-09	1.03767e-07	Down
lnc-MSTRG.33623.1	18.4467	2.25667	-3.03109	4.0848e-09	1.06881e-07	Down
lnc-MSTRG.12746.1	0.74	17.6367	4.57491	5.36207e-09	1.3934e-07	Up
lnc-MSTRG.33907.1	0.001	2.77333	11.4374	5.90872e-09	1.51926e-07	Up
lnc-MSTRG.13774.1	4.16333	0.001	-12.0235	5.92647e-09	1.51926e-07	Down
lnc-MSTRG.14079.1	0.001	2.51333	11.2954	6.12365e-09	1.55927e-07	Up
lnc-MSTRG.1194.1	0.0166667	6.59333	8.6279	6.8624e-09	1.73573e-07	Up
lnc-MSTRG.4463.1	53.4867	2.22	-4.59055	6.95629e-09	1.74783e-07	Down
lnc-MSTRG.27121.1	0.001	4.25	12.0532	7.36307e-09	1.83355e-07	Up
lnc-MSTRG.28888.1	1.18	0.001	-10.2046	7.39411e-09	1.83355e-07	Down
lnc-MSTRG.5028.1	0.12	3.54	4.88264	8.70996e-09	2.14048e-07	Up
lnc-MSTRG.1026.1	2	18.2	3.18587	8.74471e-09	2.14048e-07	Up
lnc-MSTRG.18996.2	1.44667	0.02	-6.17659	9.66745e-09	2.35117e-07	Down
lnc-MSTRG.25942.3	3.95667	20.28	2.3577	9.96301e-09	2.40762e-07	Up
lnc-MSTRG.56.2	21.19	316.04	3.89865	1.00556e-08	2.41461e-07	Up
lnc-MSTRG.17983.1	57.0333	3.44667	-4.04853	1.04603e-08	2.49599e-07	Down
lnc-MSTRG.32132.1	22.7833	4.63333	-2.29786	1.18081e-08	2.79999e-07	Down
lnc-MSTRG.21730.1	0.0866667	9.45	6.76869	1.19971e-08	2.82715e-07	Up
lnc-MSTRG.5358.1	0.153333	2.82667	4.20436	1.23359e-08	2.88905e-07	Up
lnc-MSTRG.7798.3	2.83667	0.001	-11.47	1.42142e-08	3.3085e-07	Down
lnc-MSTRG.6544.1	0.001	9.08667	13.1495	1.60156e-08	3.70506e-07	Up
lnc-MSTRG.21866.1	4.51667	0.136667	-5.04653	1.66298e-08	3.82385e-07	Down
lnc-MSTRG.20388.2	1.59333	0.0733333	-4.44144	1.67496e-08	3.8282e-07	Down
lnc-MSTRG.741.1	1.92	0.256667	-2.90314	1.74932e-08	3.97421e-07	Down
lnc-MSTRG.16002.1	0.203333	8.54	5.39232	1.97364e-08	4.44059e-07	Up
lnc-MSTRG.5477.1	207.767	23.9233	-3.11847	1.97802e-08	4.44059e-07	Down
lnc-MSTRG.7840.1	7.46	0.001	-12.865	1.99684e-08	4.45648e-07	Down
lnc-MSTRG.29988.1	0.39	5.80667	3.89616	2.0595e-08	4.56944e-07	Up
lnc-MSTRG.29474.1	11.9633	2.79	-2.10028	2.14802e-08	4.73814e-07	Down
lnc-MSTRG.9140.2	2.11333	0.001	-11.0453	2.29673e-08	5.03688e-07	Down
lnc-MSTRG.18137.1	19.9733	1.10667	-4.17378	2.35349e-08	5.13169e-07	Down
lnc-MSTRG.24523.1	9.32667	0.0533333	-7.45018	2.72345e-08	5.90443e-07	Down
lnc-MSTRG.24387.2	1.95	0.001	-10.9293	2.88165e-08	6.21193e-07	Down
lnc-MSTRG.617.1	3.51	0.0266667	-7.04029	2.91438e-08	6.23248e-07	Down
lnc-MSTRG.939.1	1.68	0.001	-10.7142	2.92404e-08	6.23248e-07	Down
lnc-MSTRG.14409.1	1.83667	0.00666667	-8.10591	3.36411e-08	7.1304e-07	Down
lnc-MSTRG.26043.1	1.66	0.0233333	-6.15265	3.52163e-08	7.42281e-07	Down
lnc-MSTRG.14734.1	1.62667	0.001	-10.6677	3.78606e-08	7.93607e-07	Down
lnc-MSTRG.25168.1	5.7	0.326667	-4.12507	3.84326e-08	7.99356e-07	Down
lnc-MSTRG.1701.2	1.47667	0.0266667	-5.79116	3.85562e-08	7.99356e-07	Down
lnc-MSTRG.19917.1	0.001	6.06333	12.5659	3.97865e-08	8.2038e-07	Up
lnc-MSTRG.13788.2	5.51	0.15	-5.19902	4.37459e-08	8.97146e-07	Down
lnc-MSTRG.19594.1	18.9333	2.8	-2.75743	4.61215e-08	9.40779e-07	Down
lnc-MSTRG.21671.2	0.0166667	3.28667	7.62352	4.7284e-08	9.59334e-07	Up
lnc-MSTRG.23626.1	10.3567	0.303333	-5.09351	4.85882e-08	9.80552e-07	Down
lnc-MSTRG.31735.3	0.05	3.4	6.08746	4.90025e-08	9.8368e-07	Up
lnc-MSTRG.32809.3	3.57667	0.48	-2.89751	4.95968e-08	9.90369e-07	Down
lnc-MSTRG.24182.1	0.0133333	2.36667	7.47168	5.23993e-08	1.04085e-06	Up
lnc-MSTRG.4242.1	0.001	0.903333	9.81911	5.42917e-08	1.07283e-06	Up
lnc-MSTRG.30285.1	0.001	5.60667	12.4529	5.51476e-08	1.08409e-06	Up
lnc-MSTRG.33959.1	0.0333333	3.01	6.49665	5.54447e-08	1.08432e-06	Up
lnc-MSTRG.10736.1	0.001	3.33667	11.7042	5.90222e-08	1.14836e-06	Up
lnc-MSTRG.17768.1	0.001	2.02	10.9801	6.92285e-08	1.34007e-06	Up
lnc-MSTRG.17196.1	6.62	0.256667	-4.68886	7.2108e-08	1.38872e-06	Down
lnc-MSTRG.27763.1	4.60667	0.001	-12.1695	7.40359e-08	1.41865e-06	Down
lnc-MSTRG.8178.1	2.94667	0.001	-11.5249	8.36547e-08	1.59003e-06	Down
lnc-MSTRG.2269.1	0.02	2.02333	6.66059	8.38179e-08	1.59003e-06	Up
lnc-MSTRG.20885.1	5.67667	26.82	2.24019	8.99128e-08	1.69716e-06	Up
lnc-MSTRG.19565.3	3.91667	0.48	-3.02852	9.84681e-08	1.84945e-06	Down
lnc-MSTRG.4262.1	9.25333	2.02667	-2.19086	1.13916e-07	2.12905e-06	Down
lnc-MSTRG.13508.1	4.39	0.0966667	-5.50506	1.1509e-07	2.14044e-06	Down
lnc-MSTRG.19223.2	0.06	4.50667	6.23095	1.18319e-07	2.18977e-06	Up
lnc-MSTRG.31575.1	0.001	1.6	10.6439	1.21243e-07	2.22821e-06	Up
lnc-MSTRG.28885.1	34.9433	3.83	-3.1896	1.21571e-07	2.22821e-06	Down
lnc-MSTRG.3199.1	0.87	0.0466667	-4.22055	1.22869e-07	2.24117e-06	Down
lnc-MSTRG.26843.1	28.0833	6.68333	-2.07107	1.25199e-07	2.26724e-06	Down
lnc-MSTRG.29028.4	0.13	6.33667	5.60714	1.25493e-07	2.26724e-06	Up
lnc-MSTRG.12381.2	4.55667	0.316667	-3.84694	1.28789e-07	2.31577e-06	Down
lnc-MSTRG.14430.1	0.07	4.38333	5.96853	1.30431e-07	2.33422e-06	Up
lnc-MSTRG.26557.2	1.19333	0.001	-10.2208	1.31106e-07	2.33528e-06	Down
lnc-MSTRG.21519.1	6.90333	0.23	-4.90759	1.32206e-07	2.34387e-06	Down
lnc-MSTRG.32256.9	0.001	3.96333	11.9525	1.34685e-07	2.37672e-06	Up
lnc-MSTRG.34596.1	49.7967	7.84	-2.66712	1.36485e-07	2.39734e-06	Down
lnc-MSTRG.28391.2	3.36333	0.116667	-4.84943	1.37974e-07	2.41006e-06	Down
lnc-MSTRG.15006.1	0.001	2.57	11.3276	1.38716e-07	2.41006e-06	Up
lnc-MSTRG.21090.1	5.23333	0.213333	-4.61655	1.39115e-07	2.41006e-06	Down
lnc-MSTRG.21593.6	1.88333	0.216667	-3.11974	1.43706e-07	2.47828e-06	Down
lnc-MSTRG.33086.1	1.58333	0.001	-10.6287	1.45139e-07	2.49166e-06	Down
lnc-MSTRG.15539.4	0.38	6.79	4.15934	1.46528e-07	2.50418e-06	Up
lnc-MSTRG.28438.1	1.96667	0.34	-2.53215	1.53264e-07	2.60755e-06	Down
lnc-MSTRG.24927.1	20.7267	3.86333	-2.42357	1.62287e-07	2.74873e-06	Down
lnc-MSTRG.23257.1	0.001	4.60667	12.1695	1.6653e-07	2.80296e-06	Up
lnc-MSTRG.12906.3	0.001	2.92333	11.5134	1.66966e-07	2.80296e-06	Up
lnc-MSTRG.24243.1	0.643333	5.51333	3.09929	1.7434e-07	2.91387e-06	Up
lnc-MSTRG.16787.1	1.46667	0.00666667	-7.78136	1.8862e-07	3.13769e-06	Down
lnc-MSTRG.21537.2	3.02333	14.64	2.2757	1.89386e-07	3.13769e-06	Up
lnc-MSTRG.16742.1	5.08667	0.226667	-4.48808	1.9084e-07	3.14803e-06	Down
lnc-MSTRG.29342.2	0.001	1.43333	10.4852	1.96391e-07	3.22558e-06	Up
lnc-MSTRG.23382.1	1.83	0.273333	-2.74311	2.00544e-07	3.27959e-06	Down
lnc-MSTRG.23334.1	5.14	0.443333	-3.5353	2.08277e-07	3.39142e-06	Down
lnc-MSTRG.21563.1	4.11667	0.29	-3.82735	2.13514e-07	3.46184e-06	Down
lnc-MSTRG.751.3	0.953333	10.7367	3.49342	2.19175e-07	3.53851e-06	Up
lnc-MSTRG.7385.2	12.8267	2.96	-2.11548	2.21318e-07	3.55796e-06	Down
lnc-MSTRG.3597.2	0.393333	3.68667	3.22849	2.32844e-07	3.72747e-06	Up
lnc-MSTRG.30048.1	0.0166667	3.47667	7.7046	2.43061e-07	3.87468e-06	Up
lnc-MSTRG.15586.1	0.001	3.13667	11.615	2.46515e-07	3.9133e-06	Up
lnc-MSTRG.3403.2	0.001	2.16	11.0768	2.65989e-07	4.20484e-06	Up
lnc-MSTRG.23620.1	2.28667	0.0133333	-7.42206	2.68718e-07	4.23036e-06	Down
lnc-MSTRG.2857.1	2.84667	0.143333	-4.31183	2.72482e-07	4.27188e-06	Down
lnc-MSTRG.12721.1	0.04	7.07333	7.46625	2.8039e-07	4.37778e-06	Up
lnc-MSTRG.12231.1	0.001	1.78333	10.8004	2.84584e-07	4.42505e-06	Up
lnc-MSTRG.23290.1	0.001	4.53667	12.1474	2.88399e-07	4.46606e-06	Up
lnc-MSTRG.1171.1	2.11667	0.0233333	-6.50326	2.89685e-07	4.46774e-06	Down
lnc-MSTRG.658.1	0.001	2.30667	11.1716	3.01325e-07	4.62845e-06	Up
lnc-MSTRG.26795.1	0.26	5.33333	4.35845	3.05764e-07	4.66664e-06	Up
lnc-MSTRG.10202.1	0.11	2.33333	4.40682	3.06271e-07	4.66664e-06	Up
lnc-MSTRG.2918.1	0.001	1.64333	10.6824	3.19315e-07	4.84592e-06	Up
lnc-MSTRG.6694.2	2.23333	0.143333	-3.96175	3.21641e-07	4.86178e-06	Down
lnc-MSTRG.22855.1	0.001	1.12333	10.1336	3.37922e-07	5.08761e-06	Up
lnc-MSTRG.16790.1	1.92	0.186667	-3.36257	3.41534e-07	5.12167e-06	Down
lnc-MSTRG.32013.1	55.3867	11.2567	-2.29876	3.47225e-07	5.1865e-06	Down
lnc-MSTRG.20470.1	1.59	0.001	-10.6348	3.58746e-07	5.33092e-06	Down
lnc-MSTRG.16015.2	0.001	3.14	11.6165	3.59704e-07	5.33092e-06	Up
lnc-MSTRG.19607.3	0.0266667	3.84667	7.17243	3.74676e-07	5.53121e-06	Up
lnc-MSTRG.30504.1	1.53667	0.001	-10.5856	3.96601e-07	5.83219e-06	Down
lnc-MSTRG.6358.2	1.17333	0.001	-10.1964	3.99093e-07	5.84617e-06	Down
lnc-MSTRG.26740.1	0.0366667	4.1	6.80501	4.04621e-07	5.90435e-06	Up
lnc-MSTRG.694.1	2.88333	0.54	-2.41671	4.14337e-07	6.02296e-06	Down
lnc-MSTRG.21314.1	2.11667	0.001	-11.0476	4.29008e-07	6.21242e-06	Down
lnc-MSTRG.14161.2	2.16333	0.001	-11.079	4.41621e-07	6.37075e-06	Down
lnc-MSTRG.4098.1	1.89333	0.001	-10.8867	4.61941e-07	6.63865e-06	Down
lnc-MSTRG.33478.1	0.001	1.94	10.9218	4.76355e-07	6.80206e-06	Up
lnc-MSTRG.25180.1	1.17333	0.0933333	-3.65208	4.76897e-07	6.80206e-06	Down
lnc-MSTRG.16266.1	0.133333	3.84333	4.84925	5.01498e-07	7.12615e-06	Up
lnc-MSTRG.12906.2	0.001	2.36667	11.2086	5.54777e-07	7.85382e-06	Up
lnc-MSTRG.30049.1	0.0366667	5.68333	7.27612	5.72802e-07	8.07268e-06	Up
lnc-MSTRG.6589.1	0.001	1.57	10.6165	5.74492e-07	8.07268e-06	Up
lnc-MSTRG.26282.1	6.93333	0.88	-2.97797	6.05168e-07	8.47235e-06	Down
lnc-MSTRG.2655.2	9.17667	0.606667	-3.91899	6.09792e-07	8.50571e-06	Down
lnc-MSTRG.17339.1	1.6	0.106667	-3.90689	6.16829e-07	8.57234e-06	Down
lnc-MSTRG.4369.1	2.16	0.04	-5.75489	6.23606e-07	8.63489e-06	Down
lnc-MSTRG.13213.2	0.02	1.48333	6.2127	6.29715e-07	8.68745e-06	Up
lnc-MSTRG.6518.1	0.001	2.87333	11.4885	6.31981e-07	8.68745e-06	Up
lnc-MSTRG.27037.1	1.57333	8.26333	2.3929	6.36688e-07	8.72056e-06	Up
lnc-MSTRG.22023.1	0.001	3.41	11.7356	6.42491e-07	8.76839e-06	Up
lnc-MSTRG.4874.1	1.8	0.001	-10.8138	6.47709e-07	8.80792e-06	Down
lnc-MSTRG.33156.1	0.001	1.11	10.1163	7.00477e-07	9.49147e-06	Up
lnc-MSTRG.13108.1	0.0733333	3.71	5.66081	7.06675e-07	9.54137e-06	Up
lnc-MSTRG.32789.1	0.001	1.23	10.2644	7.10296e-07	9.55625e-06	Up
lnc-MSTRG.23615.1	0.001	5.24	12.3554	7.34862e-07	9.85183e-06	Up
lnc-MSTRG.22912.1	1.46333	7.09333	2.27721	7.38016e-07	9.85927e-06	Up
lnc-MSTRG.22962.2	1.91667	0.02	-6.58246	7.53434e-07	1.00299e-05	Down
lnc-MSTRG.1788.1	24.71	85.2233	1.78615	7.81672e-07	1.03694e-05	Up
lnc-MSTRG.14074.1	2.74667	0.06	-5.51658	8.06792e-07	1.06654e-05	Down
lnc-MSTRG.23813.1	1.53667	0.001	-10.5856	8.21397e-07	1.08208e-05	Down
lnc-MSTRG.15212.2	0.623333	5.09	3.02959	8.39957e-07	1.1027e-05	Up
lnc-MSTRG.29028.2	0.686667	8.15	3.56912	8.46004e-07	1.10576e-05	Up
lnc-MSTRG.8943.1	1.17667	0.001	-10.2005	8.48117e-07	1.10576e-05	Down
lnc-MSTRG.8360.2	1.27333	0.001	-10.3144	8.74755e-07	1.13658e-05	Down
lnc-MSTRG.8614.1	0.001	2.85	11.4767	8.94077e-07	1.15772e-05	Up
lnc-MSTRG.31178.1	3.34	0.273333	-3.61111	8.97724e-07	1.15849e-05	Down
lnc-MSTRG.32795.1	2.29333	0.03	-6.25634	9.52973e-07	1.22562e-05	Down
lnc-MSTRG.5908.1	2.33667	0.0466667	-5.64592	1.03816e-06	1.33066e-05	Down
lnc-MSTRG.34249.1	2.80333	0.873333	-1.68254	1.05138e-06	1.34307e-05	Down
lnc-MSTRG.12664.4	0.69	3.88333	2.49263	1.06783e-06	1.35396e-05	Up
lnc-MSTRG.25631.1	2.05	0.0766667	-4.74088	1.06806e-06	1.35396e-05	Down
lnc-MSTRG.32133.1	4.81	0.216667	-4.47249	1.07324e-06	1.35396e-05	Down
lnc-MSTRG.3152.3	0.936667	10.2033	3.44536	1.07418e-06	1.35396e-05	Up
lnc-MSTRG.18804.1	1.23	0.001	-10.2644	1.0816e-06	1.35649e-05	Down
lnc-MSTRG.25818.1	0.001	3.47333	11.7621	1.08333e-06	1.35649e-05	Up
lnc-MSTRG.28108.1	3.50333	0.0533333	-6.03755	1.08883e-06	1.35889e-05	Down
lnc-MSTRG.4363.1	0.001	1.75667	10.7786	1.14286e-06	1.42165e-05	Up
lnc-MSTRG.7926.1	0.001	4.69667	12.1974	1.15024e-06	1.42615e-05	Up
lnc-MSTRG.21544.2	1.17	0.116667	-3.32604	1.22806e-06	1.51767e-05	Down
lnc-MSTRG.18467.1	1.48333	0.001	-10.5346	1.31714e-06	1.62247e-05	Down
lnc-MSTRG.30567.1	1.33333	0.001	-10.3808	1.35674e-06	1.66585e-05	Down
lnc-MSTRG.7248.1	0.0166667	0.956667	5.84298	1.38712e-06	1.69766e-05	Up
lnc-MSTRG.25795.1	5.63333	48.1733	3.09617	1.41801e-06	1.72989e-05	Up
lnc-MSTRG.4388.1	0.001	3.01	11.5555	1.5466e-06	1.8807e-05	Up
lnc-MSTRG.29989.1	2.44667	10.2433	2.0658	1.57653e-06	1.90039e-05	Up
lnc-MSTRG.19426.2	9.80667	0.953333	-3.36271	1.57731e-06	1.90039e-05	Down
lnc-MSTRG.23378.1	1.48667	0.0433333	-5.10046	1.57782e-06	1.90039e-05	Down
lnc-MSTRG.15767.1	1.75667	0.001	-10.7786	1.5851e-06	1.90313e-05	Down
lnc-MSTRG.16456.1	0.001	3.19	11.6393	1.72531e-06	2.06493e-05	Up
lnc-MSTRG.14812.1	0.123333	2.98667	4.5979	1.76527e-06	2.10603e-05	Up
lnc-MSTRG.9869.2	3.77667	0.156667	-4.59134	1.77075e-06	2.10603e-05	Down
lnc-MSTRG.14.3	0.156667	29.59	7.56127	1.80246e-06	2.13704e-05	Up
lnc-MSTRG.31433.1	1.55	21.9967	3.82694	1.86626e-06	2.2058e-05	Up
lnc-MSTRG.5707.3	1.29333	0.0466667	-4.79256	1.92465e-06	2.26774e-05	Down
lnc-MSTRG.26615.1	0.313333	2.42667	2.95321	1.96741e-06	2.31095e-05	Up
lnc-MSTRG.31818.1	4.60333	0.126667	-5.18357	2.0277e-06	2.37441e-05	Down
lnc-MSTRG.25908.3	0.001	2.00667	10.9706	2.04608e-06	2.38857e-05	Up
lnc-MSTRG.8626.1	1.64667	0.0433333	-5.24793	2.3542e-06	2.73983e-05	Down
lnc-MSTRG.15548.1	2.48	11.4	2.20062	2.36721e-06	2.74654e-05	Up
lnc-MSTRG.28184.1	1.91667	0.001	-10.9044	2.3801e-06	2.75308e-05	Down
lnc-MSTRG.10434.2	1.98	0.04	-5.62936	2.4638e-06	2.84123e-05	Down
lnc-MSTRG.25265.1	0.001	2.73	11.4147	2.47993e-06	2.85117e-05	Up
lnc-MSTRG.21496.1	0.001	13.7733	13.7496	2.50341e-06	2.86947e-05	Up
lnc-MSTRG.16852.1	0.323333	4.00333	3.63011	2.59349e-06	2.96377e-05	Up
lnc-MSTRG.33696.1	0.001	1.85	10.8533	2.7576e-06	3.14184e-05	Up
lnc-MSTRG.2049.1	4.80667	0.87	-2.46595	2.8634e-06	3.25262e-05	Down
lnc-MSTRG.2954.2	0.82	0.001	-9.67948	3.1052e-06	3.51518e-05	Down
lnc-MSTRG.26291.1	0.001	1.48	10.5314	3.12149e-06	3.51518e-05	Up
lnc-MSTRG.17558.1	11.9633	1.71333	-2.80374	3.12234e-06	3.51518e-05	Down
lnc-MSTRG.5100.1	1.73	0.0166667	-6.69766	3.13303e-06	3.51678e-05	Down
lnc-MSTRG.12384.4	1.38	6.88333	2.31844	3.34221e-06	3.74051e-05	Up
lnc-MSTRG.15033.1	0.001	2.25667	11.14	3.40155e-06	3.79573e-05	Up
lnc-MSTRG.2386.1	0.11	1.51333	3.78215	3.41972e-06	3.80481e-05	Up
lnc-MSTRG.24182.3	0.001	1.30333	10.348	3.43356e-06	3.80904e-05	Up
lnc-MSTRG.34275.1	124.477	13.05	-3.25375	3.48067e-06	3.85004e-05	Down
lnc-MSTRG.34037.1	2.34667	0.0333333	-6.1375	3.51403e-06	3.87565e-05	Down
lnc-MSTRG.1898.1	1.69333	0.001	-10.7257	3.71191e-06	4.08203e-05	Down
lnc-MSTRG.34240.1	11.7033	3.59667	-1.70219	4.00891e-06	4.3959e-05	Down
lnc-MSTRG.12644.2	33.1633	0.593333	-5.8046	4.19797e-06	4.58994e-05	Down
lnc-MSTRG.13688.1	2.49333	10.92	2.13083	4.25672e-06	4.6408e-05	Up
lnc-MSTRG.5914.1	2.11667	0.173333	-3.61017	4.29118e-06	4.66289e-05	Down
lnc-MSTRG.12485.1	2.77667	0.0966667	-4.84419	4.30156e-06	4.66289e-05	Down
lnc-MSTRG.16781.1	1.12333	0.001	-10.1336	4.31585e-06	4.6634e-05	Down
lnc-MSTRG.21543.1	0.001	3.11333	11.6042	4.32661e-06	4.6634e-05	Up
lnc-MSTRG.29477.1	1.98333	0.1	-4.30986	4.40732e-06	4.73693e-05	Down
lnc-MSTRG.2200.1	2.20667	0.313333	-2.8161	4.43459e-06	4.75277e-05	Down
lnc-MSTRG.617.2	4.82667	0.18	-4.74496	4.55086e-06	4.86365e-05	Down
lnc-MSTRG.28371.1	19.1	1.55	-3.62323	4.76099e-06	5.07393e-05	Down
lnc-MSTRG.15807.1	1.91333	0.0133333	-7.16491	4.85032e-06	5.15465e-05	Down
lnc-MSTRG.8689.1	1.15667	0.116667	-3.30951	4.89444e-06	5.17623e-05	Down
lnc-MSTRG.21771.1	2.83333	0.386667	-2.87334	4.89791e-06	5.17623e-05	Down
lnc-MSTRG.14465.1	1.25667	0.136667	-3.20087	4.97796e-06	5.24622e-05	Down
lnc-MSTRG.6017.1	0.001	1.82667	10.835	4.9984e-06	5.25316e-05	Up
lnc-MSTRG.18791.2	0.0166667	2.73667	7.35931	5.01538e-06	5.25645e-05	Up
lnc-MSTRG.17225.1	0.0166667	2.07333	6.95884	5.12041e-06	5.35174e-05	Up
lnc-MSTRG.1480.1	0.283333	4.65333	4.03769	5.24429e-06	5.46616e-05	Up
lnc-MSTRG.32135.1	4.26667	0.62	-2.78277	5.33493e-06	5.5454e-05	Down
lnc-MSTRG.26189.1	0.856667	4.46333	2.38132	5.43331e-06	5.63223e-05	Up
lnc-MSTRG.9546.1	4.28667	0.0966667	-5.47069	5.48713e-06	5.67253e-05	Down
lnc-MSTRG.18939.1	0.001	1.67333	10.7085	5.84161e-06	6.02257e-05	Up
lnc-MSTRG.32913.1	0.93	0.001	-9.86109	5.89494e-06	6.06109e-05	Down
lnc-MSTRG.2639.1	2.48667	0.04	-5.95807	6.09611e-06	6.25099e-05	Down
lnc-MSTRG.12431.1	1.56	0.0266667	-5.87036	6.11274e-06	6.25114e-05	Down
lnc-MSTRG.23939.1	0.93	0.001	-9.86109	6.18642e-06	6.30948e-05	Down
lnc-MSTRG.14211.5	0.0933333	1.16	3.63559	6.70736e-06	6.82245e-05	Up
lnc-MSTRG.32556.1	0.001	3.2	11.6439	6.97355e-06	7.06057e-05	Up
lnc-MSTRG.22127.1	1.16667	0.001	-10.1882	6.97869e-06	7.06057e-05	Down
lnc-MSTRG.21465.1	0.796667	20.4	4.67845	7.12616e-06	7.1906e-05	Up
lnc-MSTRG.4424.1	16.21	2.66	-2.60739	7.20894e-06	7.25484e-05	Down
lnc-MSTRG.18824.1	4.58	0.483333	-3.24426	7.41889e-06	7.44636e-05	Down
lnc-MSTRG.11251.2	0.001	1.72667	10.7538	7.49139e-06	7.4993e-05	Up
lnc-MSTRG.12673.1	0.03	1.52	5.66297	7.70608e-06	7.69391e-05	Up
lnc-MSTRG.18995.1	1.32	0.001	-10.3663	7.96777e-06	7.93431e-05	Down
lnc-MSTRG.1274.1	0.213333	2.76333	3.69523	8.12868e-06	8.07335e-05	Up
lnc-MSTRG.3096.1	0.613333	3.57667	2.54387	8.28375e-06	8.20589e-05	Up
lnc-MSTRG.26629.1	3.2	0.23	-3.79837	8.49737e-06	8.39558e-05	Down
lnc-MSTRG.13252.1	0.206667	4.44	4.42518	8.5472e-06	8.42288e-05	Up
lnc-MSTRG.10001.1	0.00666667	2.01667	8.24079	8.62097e-06	8.47357e-05	Up
lnc-MSTRG.23119.1	1.39	0.001	-10.4409	8.88219e-06	8.70776e-05	Down
lnc-MSTRG.1848.1	1.87667	0.001	-10.874	9.28074e-06	9.07503e-05	Down
lnc-MSTRG.12993.1	7.55667	0.0566667	-7.05911	9.51539e-06	9.28056e-05	Down
lnc-MSTRG.10769.1	2.45333	0.04	-5.9386	9.59017e-06	9.32951e-05	Down
lnc-MSTRG.7897.1	1.24333	8.84	2.82983	9.67911e-06	9.39195e-05	Up
lnc-MSTRG.32926.1	0.001	1.87667	10.874	9.77118e-06	9.45711e-05	Up
lnc-MSTRG.32442.2	0.113333	8.79667	6.27831	9.87559e-06	9.53384e-05	Up
lnc-MSTRG.25367.1	55.33	17.7133	-1.64323	9.99552e-06	9.62513e-05	Down
lnc-MSTRG.26159.1	1.49	0.001	-10.5411	1.05066e-05	0.000100745	Down
lnc-MSTRG.31563.1	3.52667	0.246667	-3.83767	1.05153e-05	0.000100745	Down
lnc-MSTRG.2462.1	1.72	0.001	-10.7482	1.06477e-05	0.000101756	Down
lnc-MSTRG.27781.1	3.63333	18.3033	2.33274	1.09915e-05	0.000104778	Up
lnc-MSTRG.27340.1	1.82	0.001	-10.8297	1.12703e-05	0.000107167	Down
lnc-MSTRG.3450.1	1.00667	11.5167	3.51607	1.15261e-05	0.00010908	Up
lnc-MSTRG.3736.7	0.09	2.03	4.49541	1.1529e-05	0.00010908	Up
lnc-MSTRG.7987.1	0.04	3.69	6.52748	1.17473e-05	0.000110869	Up
lnc-MSTRG.22461.1	1.37333	0.0133333	-6.6865	1.19043e-05	0.000112071	Down
lnc-MSTRG.16490.1	50.4933	11.92	-2.08271	1.21583e-05	0.000114179	Down
lnc-MSTRG.20943.1	33.5967	124.28	1.8872	1.30108e-05	0.000121884	Up
lnc-MSTRG.24388.1	2.96	0.0766667	-5.27085	1.34974e-05	0.000126131	Down
lnc-MSTRG.10371.3	4.19667	0.96	-2.12814	1.42437e-05	0.000132778	Down
lnc-MSTRG.23521.1	1.30333	0.001	-10.348	1.4286e-05	0.000132846	Down
lnc-MSTRG.23875.1	0.0266667	1.52667	5.8392	1.50094e-05	0.000139231	Up
lnc-MSTRG.13671.1	0.001	1.34333	10.3916	1.50792e-05	0.000139538	Up
lnc-MSTRG.26474.1	1.16333	0.001	-10.184	1.52635e-05	0.000140899	Down
lnc-MSTRG.22689.1	1.93667	0.316667	-2.61254	1.53917e-05	0.000141738	Down
lnc-MSTRG.4766.1	2.84333	0.973333	-1.54658	1.54603e-05	0.000142025	Down
lnc-MSTRG.34595.1	20.02	3.98	-2.3306	1.58482e-05	0.000144629	Down
lnc-MSTRG.16552.1	2.11	0.001	-11.043	1.58529e-05	0.000144629	Down
lnc-MSTRG.9005.1	1.36667	0.001	-10.4164	1.58581e-05	0.000144629	Down
lnc-MSTRG.22512.1	0.986667	0.001	-9.94642	1.63709e-05	0.000148942	Down
lnc-MSTRG.11555.1	0.38	0.001	-8.56986	1.64095e-05	0.000148942	Down
lnc-MSTRG.17871.1	0.97	0.001	-9.92184	1.64659e-05	0.000149097	Down
lnc-MSTRG.151.1	2.6	0.001	-11.3443	1.76858e-05	0.000159762	Down
lnc-MSTRG.15701.1	0.001	1.68	10.7142	1.81139e-05	0.00016324	Up
lnc-MSTRG.27473.3	0.0866667	2.62333	4.91978	1.82015e-05	0.000163641	Up
lnc-MSTRG.6381.2	1.63667	8.04	2.29643	1.8482e-05	0.00016577	Up
lnc-MSTRG.26433.1	2.07	0.001	-11.0154	1.88474e-05	0.000168649	Down
lnc-MSTRG.33842.1	1.44667	0.001	-10.4985	1.92158e-05	0.000171541	Down
lnc-MSTRG.11681.1	0.001	1.04667	10.0316	1.92783e-05	0.000171694	Up
lnc-MSTRG.18445.1	0.0866667	4.35	5.64939	1.94009e-05	0.000172382	Up
lnc-MSTRG.6917.1	0.001	1.21333	10.2448	1.97523e-05	0.000175094	Up
lnc-MSTRG.32357.1	2.05667	0.396667	-2.37431	1.99859e-05	0.000176752	Down
lnc-MSTRG.23056.1	1.45667	0.0933333	-3.96413	2.03494e-05	0.000179548	Down
lnc-MSTRG.33381.3	0.0766667	1.32	4.10579	2.12273e-05	0.00018686	Up
lnc-MSTRG.19565.4	6.42	0.3	-4.41954	2.15599e-05	0.000188998	Down
lnc-MSTRG.21462.1	0.001	1.88333	10.8791	2.15699e-05	0.000188998	Up
lnc-MSTRG.3460.2	1.68	0.0833333	-4.33342	2.20131e-05	0.000192437	Down
lnc-MSTRG.24593.2	0.133333	2.02667	3.926	2.24824e-05	0.000196088	Up
lnc-MSTRG.7387.1	0.283333	3.57333	3.6567	2.30729e-05	0.000200776	Up
lnc-MSTRG.6838.1	0.973333	0.0433333	-4.48938	2.37291e-05	0.000206014	Down
lnc-MSTRG.20337.1	0.05	1.27333	4.67054	2.48427e-05	0.00021519	Up
lnc-MSTRG.23511.1	0.506667	0.001	-8.98489	2.54953e-05	0.00022034	Down
lnc-MSTRG.7180.1	0.08	1.47	4.19967	2.5951e-05	0.000223769	Up
lnc-MSTRG.14131.1	0.353333	4.08667	3.53182	2.71126e-05	0.000233254	Up
lnc-MSTRG.11509.1	1.30667	0.001	-10.3517	2.80704e-05	0.000240624	Down
lnc-MSTRG.873.1	2.27	0.0733333	-4.95208	2.81121e-05	0.000240624	Down
lnc-MSTRG.29829.1	2.02667	0.33	-2.61857	2.81595e-05	0.000240624	Down
lnc-MSTRG.34245.1	3.88	1.38667	-1.48444	2.87142e-05	0.000244813	Down
lnc-MSTRG.7107.1	0.001	1.33667	10.3844	3.09691e-05	0.000263446	Up
lnc-MSTRG.26259.1	1.19	4.43667	1.89851	3.12768e-05	0.000265468	Up
lnc-MSTRG.16551.1	1	0.0133333	-6.22882	3.14957e-05	0.000266534	Down
lnc-MSTRG.6553.1	8.80333	1.58	-2.47813	3.1576e-05	0.000266534	Down
lnc-MSTRG.23906.1	1.19333	0.07	-4.0915	3.16132e-05	0.000266534	Down
lnc-MSTRG.12076.1	0.25	2.97333	3.57208	3.17554e-05	0.00026714	Up
lnc-MSTRG.19608.1	0.001	3.34667	11.7085	3.23167e-05	0.00027126	Up
lnc-MSTRG.22147.3	1.48	0.001	-10.5314	3.34408e-05	0.000280076	Down
lnc-MSTRG.19729.1	2.60333	0.54	-2.26933	3.43946e-05	0.00028743	Down
lnc-MSTRG.5151.1	0.001	2.15667	11.0746	3.52725e-05	0.000294118	Up
lnc-MSTRG.7222.1	4.06667	0.09	-5.49778	3.55689e-05	0.00029594	Down
lnc-MSTRG.25650.2	1.56	0.001	-10.6073	3.69547e-05	0.000306797	Down
lnc-MSTRG.730.1	5.74333	1.84	-1.64218	3.7759e-05	0.000312789	Down
lnc-MSTRG.14121.1	1.39667	0.123333	-3.50135	3.81899e-05	0.00031567	Down
lnc-MSTRG.5330.1	1.52333	0.001	-10.573	4.0705e-05	0.000335727	Down
lnc-MSTRG.20546.2	0.001	3.03667	11.5683	4.2052e-05	0.000346085	Up
lnc-MSTRG.31916.1	2.22333	0.03	-6.21162	4.23866e-05	0.000348084	Down
lnc-MSTRG.24898.2	0.13	4.69333	5.17403	4.28379e-05	0.00035103	Up
lnc-MSTRG.31735.1	0.001	0.783333	9.61348	4.41616e-05	0.000361097	Up
lnc-MSTRG.4070.1	0.001	1.36333	10.4129	4.49868e-05	0.000367054	Up
lnc-MSTRG.21606.2	3.16	0.533333	-2.56682	4.53455e-05	0.000368943	Down
lnc-MSTRG.12803.1	7.75667	0.0533333	-7.18426	4.54128e-05	0.000368943	Down
lnc-MSTRG.27637.1	3.29333	15.7967	2.262	4.85305e-05	0.000393414	Up
lnc-MSTRG.31638.1	3.72	0.22	-4.07973	4.86324e-05	0.000393414	Down
lnc-MSTRG.6551.4	1.51667	0.0466667	-5.02237	4.92111e-05	0.000397249	Down
lnc-MSTRG.7653.1	0.93	0.0666667	-3.80219	5.01598e-05	0.000404047	Down
lnc-MSTRG.639.1	1.67667	0.06	-4.80449	5.15071e-05	0.000414021	Down
lnc-MSTRG.14849.1	1.02667	0.0533333	-4.26679	5.25831e-05	0.000421776	Down
lnc-MSTRG.3787.2	1.81333	6.61	1.86601	5.30391e-05	0.000424537	Up
lnc-MSTRG.417.1	1.15	0.001	-10.1674	5.32472e-05	0.000425305	Down
lnc-MSTRG.15373.5	0.783333	0.001	-9.61348	5.367e-05	0.00042692	Down
lnc-MSTRG.17925.1	4.51	1.22667	-1.87838	5.36744e-05	0.00042692	Down
lnc-MSTRG.19812.1	3.14	0.123333	-4.67013	5.43167e-05	0.000431125	Down
lnc-MSTRG.29705.1	1.13667	0.0166667	-6.0917	5.74821e-05	0.000455297	Down
lnc-MSTRG.7828.1	4.68	1.13	-2.05019	5.83077e-05	0.000460874	Down
lnc-MSTRG.7003.2	0.153333	2.24333	3.8709	5.95781e-05	0.000469936	Up
lnc-MSTRG.32526.1	0.0633333	1.39667	4.46288	6.12771e-05	0.000481537	Up
lnc-MSTRG.6541.3	3	0.61	-2.29808	6.13026e-05	0.000481537	Down
lnc-MSTRG.34226.1	533.87	139.22	-1.93912	6.1861e-05	0.000484889	Down
lnc-MSTRG.10388.1	1.90667	0.11	-4.11548	6.1985e-05	0.000484889	Down
lnc-MSTRG.34171.1	4.4	0.0233333	-7.55897	6.21972e-05	0.000485548	Down
lnc-MSTRG.25330.1	0.31	7.58333	4.61249	6.24912e-05	0.000486841	Up
lnc-MSTRG.23396.2	40.7	11.4633	-1.828	6.26966e-05	0.000487441	Down
lnc-MSTRG.19426.3	2.54	0.35	-2.8594	6.37832e-05	0.000494874	Down
lnc-MSTRG.24321.1	0.001	1.85	10.8533	6.52787e-05	0.000505032	Up
lnc-MSTRG.12442.1	7.31	2.42333	-1.59288	6.53586e-05	0.000505032	Down
lnc-MSTRG.29954.1	0.001	4.14	12.0154	6.72511e-05	0.000518599	Up
lnc-MSTRG.10216.1	1.66667	0.32	-2.38082	7.10281e-05	0.000546322	Down
lnc-MSTRG.6630.1	0.0233333	1.24667	5.73954	7.11342e-05	0.000546322	Up
lnc-MSTRG.17935.1	2.99667	0.0666667	-5.49025	7.19636e-05	0.000551576	Down
lnc-MSTRG.16634.1	1.14	0.001	-10.1548	7.26091e-05	0.000555401	Down
lnc-MSTRG.13074.1	0.001	1.58	10.6257	7.31065e-05	0.00055808	Up
lnc-MSTRG.6152.1	0.1	1.51667	3.92283	7.5032e-05	0.000571629	Up
lnc-MSTRG.22399.2	0.0666667	1.56667	4.55459	7.70455e-05	0.000585793	Up
lnc-MSTRG.4049.1	4.39333	0.26	-4.07873	7.95378e-05	0.000603533	Down
lnc-MSTRG.28107.1	1.14667	0.0166667	-6.10434	8.16084e-05	0.000618009	Down
lnc-MSTRG.7724.1	0.001	1.4	10.4512	8.31303e-05	0.00062828	Up
lnc-MSTRG.1461.1	0.001	0.86	9.74819	8.44128e-05	0.000636704	Up
lnc-MSTRG.17025.1	1.76667	0.136667	-3.6923	8.61185e-05	0.000648281	Down
lnc-MSTRG.32486.1	0.243333	3.96333	4.02571	8.7484e-05	0.000657256	Up
lnc-MSTRG.4509.2	1.51667	0.06	-4.6598	8.99926e-05	0.000674766	Down
lnc-MSTRG.4950.1	0.836667	0.01	-6.38658	9.34662e-05	0.00069943	Down
lnc-MSTRG.4014.1	1.12	0.0166667	-6.07039	9.52966e-05	0.000711723	Down
lnc-MSTRG.29403.1	1.05	0.001	-10.0362	9.68084e-05	0.00072023	Down
lnc-MSTRG.5657.1	1.65	0.001	-10.6883	9.68153e-05	0.00072023	Down
lnc-MSTRG.34041.1	9.70333	0.533333	-4.18537	9.7512e-05	0.000723993	Down
lnc-MSTRG.11378.1	0.0166667	1.72667	6.69488	0.000100444	0.000744302	Up
lnc-MSTRG.23059.1	0.03	3.29667	6.7799	0.000101016	0.000747082	Up
lnc-MSTRG.34322.1	4.95667	1.38333	-1.84122	0.000102021	0.000753051	Down
lnc-MSTRG.26156.1	12.62	3.3	-1.93517	0.000102659	0.000755798	Down
lnc-MSTRG.31584.2	4.68	0.35	-3.74108	0.000102792	0.000755798	Down
lnc-MSTRG.21539.1	1.81333	0.001	-10.8244	0.000103842	0.000762044	Down
lnc-MSTRG.26578.2	0.636667	3.76667	2.56468	0.000106953	0.000783356	Up
lnc-MSTRG.22157.1	7.03	1	-2.81352	0.000107294	0.000784341	Down
lnc-MSTRG.3977.1	0.02	1.43667	6.16658	0.000107519	0.000784476	Up
lnc-MSTRG.21188.1	0.74	0.001	-9.53138	0.000108135	0.000787458	Down
lnc-MSTRG.16228.1	0.001	1.53	10.5793	0.000108542	0.000788902	Up
lnc-MSTRG.615.1	1.38	0.12	-3.52356	0.000113954	0.000825504	Down
lnc-MSTRG.15127.1	2.97333	0.001	-11.5379	0.000114013	0.000825504	Down
lnc-MSTRG.34588.1	0.15	5.09333	5.08558	0.000114503	0.000826469	Up
lnc-MSTRG.15460.2	0.213333	3.32667	3.9629	0.000114582	0.000826469	Up
lnc-MSTRG.17111.1	0.001	1.32667	10.3736	0.000116583	0.000839312	Up
lnc-MSTRG.24615.2	2.45	0.2	-3.61471	0.000119224	0.000856696	Down
lnc-MSTRG.29683.3	5.16333	0.103333	-5.64293	0.000121411	0.000870764	Down
lnc-MSTRG.18464.1	0.0966667	1.46	3.91681	0.0001244	0.000890517	Up
lnc-MSTRG.10898.1	0.163333	2.74	4.06828	0.000125235	0.000894806	Up
lnc-MSTRG.34611.1	41.9367	9.74667	-2.10523	0.00012593	0.000898078	Down
lnc-MSTRG.27264.1	1.82333	0.223333	-3.02931	0.000126746	0.000902204	Down
lnc-MSTRG.24105.1	1.27667	0.001	-10.3182	0.000129026	0.000916712	Down
lnc-MSTRG.4189.1	0.03	1.22	5.34577	0.000129707	0.000919826	Up
lnc-MSTRG.13331.1	3.76	1.17	-1.68422	0.000130406	0.000923063	Down
lnc-MSTRG.4133.1	0.001	1.15333	10.1716	0.000130939	0.000924246	Up
lnc-MSTRG.7033.1	1.31333	0.001	-10.359	0.000131061	0.000924246	Down
lnc-MSTRG.21090.2	3.4	0.0766667	-5.47079	0.000131358	0.000924626	Down
lnc-MSTRG.20398.1	0.001	1.33333	10.3808	0.00013201	0.000927495	Up
lnc-MSTRG.7029.1	0.0833333	1.28667	3.9486	0.000133701	0.000937639	Up
lnc-MSTRG.11791.1	1.02	0.001	-9.99435	0.00013466	0.000942623	Down
lnc-MSTRG.3764.1	1.05667	0.001	-10.0453	0.000136557	0.000954136	Down
lnc-MSTRG.17704.1	0.0733333	1.67333	4.51211	0.000137202	0.000956884	Up
lnc-MSTRG.15759.1	9.39667	25.95	1.46551	0.000140167	0.000975771	Up
lnc-MSTRG.33813.1	4.10667	0.75	-2.45301	0.000143	0.000993665	Down
lnc-MSTRG.12607.1	0.163333	2.50667	3.93988	0.000144975	0.00100555	Up
lnc-MSTRG.19857.5	0.0466667	1.03333	4.46877	0.000148308	0.00102679	Up
lnc-MSTRG.25439.1	1.27	0.0833333	-3.92979	0.00014964	0.00103412	Down
lnc-MSTRG.28342.4	0.0766667	3.24	5.40125	0.000153115	0.00105621	Up
lnc-MSTRG.4551.1	2.35333	0.156667	-3.90894	0.000153717	0.00105844	Down
lnc-MSTRG.10466.1	2.53	0.483333	-2.38805	0.0001553	0.00106741	Down
lnc-MSTRG.4951.3	5.34333	0.306667	-4.123	0.000156104	0.00107099	Down
lnc-MSTRG.29558.1	0.001	0.843333	9.71996	0.000160072	0.00109623	Up
lnc-MSTRG.26474.3	0.623333	0.001	-9.28386	0.000160868	0.0010997	Down
lnc-MSTRG.19143.1	11.09	39.7167	1.84049	0.000167777	0.00114486	Up
lnc-MSTRG.8987.1	0.001	0.623333	9.28386	0.000170969	0.00116456	Up
lnc-MSTRG.27885.1	0.001	1.99333	10.961	0.000176297	0.00119869	Up
lnc-MSTRG.32271.1	12.1533	3.02333	-2.00714	0.000177609	0.00120545	Down
lnc-MSTRG.21367.2	4.45333	1.07333	-2.05279	0.00018031	0.00122025	Down
lnc-MSTRG.33140.1	1.19	0.001	-10.2167	0.000180433	0.00122025	Down
lnc-MSTRG.25923.3	0.06	1.1	4.1964	0.000180851	0.00122091	Up
lnc-MSTRG.630.2	48.96	216.557	2.14507	0.000184411	0.00124273	Up
lnc-MSTRG.6277.1	0.343333	4.95333	3.85072	0.000185188	0.00124575	Up
lnc-MSTRG.29944.1	1.64333	0.17	-3.27302	0.000188641	0.00126673	Down
lnc-MSTRG.27073.1	0.001	2.87333	11.4885	0.000189252	0.00126859	Up
lnc-MSTRG.3948.1	0.001	1.40667	10.4581	0.000190379	0.0012739	Up
lnc-MSTRG.28372.1	3.79333	0.51	-2.8949	0.000193021	0.0012893	Down
lnc-MSTRG.28208.1	2.1	0.001	-11.0362	0.000196509	0.00131029	Down
lnc-MSTRG.12283.3	1.19	0.001	-10.2167	0.000200285	0.00133312	Down
lnc-MSTRG.23628.1	10.02	0.526667	-4.24985	0.000201351	0.00133787	Down
lnc-MSTRG.34434.1	0.001	1.24333	10.28	0.000219933	0.00145878	Up
lnc-MSTRG.16804.4	1.2	0.0166667	-6.16993	0.000223501	0.00147935	Down
lnc-MSTRG.24913.3	0.643333	7.92	3.62186	0.000223813	0.00147935	Up
lnc-MSTRG.33812.2	0.001	1.29333	10.3369	0.000230798	0.00152287	Up
lnc-MSTRG.34147.1	0.001	1.49	10.5411	0.000238546	0.00157126	Up
lnc-MSTRG.26448.1	0.843333	0.001	-9.71996	0.000241303	0.00158666	Down
lnc-MSTRG.28049.1	0.001	1.37667	10.427	0.000244379	0.00160411	Up
lnc-MSTRG.8827.3	1.18333	0.0333333	-5.14975	0.000248298	0.00162702	Down
lnc-MSTRG.27964.1	87.5	21.9	-1.99835	0.000252133	0.0016493	Down
lnc-MSTRG.12672.1	0.001	1.81	10.8218	0.000252794	0.00165078	Up
lnc-MSTRG.26262.1	1.72333	0.0166667	-6.69209	0.000257293	0.00167727	Down
lnc-MSTRG.25010.4	1.66333	17.47	3.39273	0.000257828	0.00167787	Up
lnc-MSTRG.24029.1	6.35667	0.526667	-3.59331	0.000258842	0.00168159	Down
lnc-MSTRG.7705.1	0.0266667	2.51	6.55651	0.000261067	0.00169314	Up
lnc-MSTRG.4845.1	0.04	1.08	4.75489	0.000262599	0.00170017	Up
lnc-MSTRG.8253.1	0.153333	2.99333	4.28701	0.000264918	0.00171226	Up
lnc-MSTRG.844.2	1.43333	0.3	-2.25634	0.000265904	0.0017151	Down
lnc-MSTRG.10798.1	0.001	0.62	9.27612	0.00026626	0.0017151	Up
lnc-MSTRG.6420.1	0.001	0.946667	9.88671	0.000273538	0.00175899	Up
lnc-MSTRG.19160.7	0.85	4.5	2.40439	0.000280648	0.00179875	Up
lnc-MSTRG.23362.1	2.47	0.09	-4.77844	0.00028094	0.00179875	Down
lnc-MSTRG.17852.1	3.11333	0.18	-4.11239	0.000281144	0.00179875	Down
lnc-MSTRG.18607.2	0.2	1.33	2.73335	0.000285212	0.00182171	Up
lnc-MSTRG.19607.2	0.0833333	1.29333	3.95606	0.000294442	0.0018775	Up
lnc-MSTRG.21516.1	2.37667	0.14	-4.08544	0.000295859	0.00188337	Down
lnc-MSTRG.7047.4	0.77	3.47333	2.17339	0.000298101	0.00189375	Up
lnc-MSTRG.32081.1	0.76	3.47667	2.19363	0.000298487	0.00189375	Up
lnc-MSTRG.25547.2	4.19667	0.28	-3.90575	0.000303845	0.00192452	Down
lnc-MSTRG.28414.1	12.7467	5.14	-1.31028	0.000310071	0.00195797	Down
lnc-MSTRG.16809.1	0.65	7.14	3.45741	0.000310287	0.00195797	Up
lnc-MSTRG.4949.2	1.12333	0.18	-2.64172	0.000310771	0.00195797	Down
lnc-MSTRG.13616.1	4.74	0.483333	-3.2938	0.00031119	0.00195797	Down
lnc-MSTRG.13259.1	1.13333	0.001	-10.1464	0.000312751	0.00196295	Down
lnc-MSTRG.5902.1	0.933333	0.001	-9.86625	0.000313017	0.00196295	Down
lnc-MSTRG.17677.1	4.67	15.26	1.70826	0.000314081	0.00196637	Up
lnc-MSTRG.6381.4	5.85333	16.0967	1.45943	0.000316657	0.00197923	Up
lnc-MSTRG.21520.2	4.53	0.886667	-2.35305	0.000317544	0.00197993	Down
lnc-MSTRG.29532.1	14.81	3.59	-2.04452	0.000317811	0.00197993	Down
lnc-MSTRG.5278.1	0.02	1.19	5.89482	0.000328967	0.00204607	Up
lnc-MSTRG.1025.1	0.92	7.09667	2.94744	0.000330597	0.00205284	Up
lnc-MSTRG.28785.1	3.83667	1.28667	-1.57622	0.000335208	0.00207807	Down
lnc-MSTRG.14233.1	0.893333	0.0133333	-6.06609	0.000336255	0.00208116	Down
lnc-MSTRG.32778.1	0.001	0.72	9.49185	0.000337347	0.00208452	Up
lnc-MSTRG.19430.1	0.653333	0.02	-5.02975	0.000338587	0.00208878	Down
lnc-MSTRG.23171.2	1.79667	0.413333	-2.11995	0.000342513	0.00210823	Down
lnc-MSTRG.22962.1	1.05667	0.09	-3.55345	0.000343144	0.00210823	Down
lnc-MSTRG.28827.2	0.123333	1.99333	4.01455	0.000343406	0.00210823	Up
lnc-MSTRG.13554.1	0.05	1.56	4.96347	0.000345728	0.00211905	Up
lnc-MSTRG.23785.1	0.0233333	1.61667	6.11449	0.000346662	0.00212135	Up
lnc-MSTRG.29749.2	0.0966667	2.73333	4.8215	0.00035295	0.00215635	Up
lnc-MSTRG.4682.1	0.266667	3.32333	3.63952	0.00035363	0.00215703	Up
lnc-MSTRG.28324.1	6.51	1.93	-1.75406	0.000354354	0.00215797	Down
lnc-MSTRG.5388.2	0.001	1	9.96578	0.000361026	0.00219508	Up
lnc-MSTRG.3925.1	2.25667	12.23	2.43816	0.000367935	0.00223351	Up
lnc-MSTRG.7399.1	0.863333	0.001	-9.75377	0.000371462	0.00225132	Down
lnc-MSTRG.14644.1	1.54333	0.0933333	-4.04751	0.000376505	0.00227825	Down
lnc-MSTRG.5017.4	0.3	1.83333	2.61143	0.000389064	0.00234907	Up
lnc-MSTRG.11221.2	0.001	1.07333	10.0679	0.000389448	0.00234907	Up
lnc-MSTRG.25913.1	1.77667	0.001	-10.795	0.00039324	0.00236818	Down
lnc-MSTRG.3163.1	1.13333	3.51333	1.63227	0.000397545	0.00239031	Up
lnc-MSTRG.26801.1	2.19667	0.523333	-2.06951	0.000408851	0.0024544	Down
lnc-MSTRG.312.1	0.001	2.19	11.0967	0.00041362	0.00247911	Up
lnc-MSTRG.10642.1	1.03333	0.001	-10.0131	0.000417342	0.00249747	Down
lnc-MSTRG.19768.1	0.37	2.51667	2.76592	0.000419756	0.00250701	Up
lnc-MSTRG.16018.1	0.963333	6.24	2.69544	0.000420257	0.00250701	Up
lnc-MSTRG.563.1	1.45667	0.001	-10.5085	0.000421881	0.00251182	Down
lnc-MSTRG.11415.1	0.41	10.6933	4.70494	0.000422389	0.00251182	Up
lnc-MSTRG.1955.1	1.56	0.206667	-2.91617	0.000426922	0.00253481	Down
lnc-MSTRG.14161.4	1.36333	0.0733333	-4.21653	0.000431566	0.00255838	Down
lnc-MSTRG.24108.1	1.54333	0.001	-10.5918	0.000433099	0.00256346	Down
lnc-MSTRG.2514.1	3.18333	0.226667	-3.81189	0.000436926	0.00257732	Down
lnc-MSTRG.7328.1	0.88	0.0233333	-5.23704	0.000437281	0.00257732	Down
lnc-MSTRG.2515.1	0.001	1.16667	10.1882	0.000437479	0.00257732	Up
lnc-MSTRG.33722.1	0.05	1.54	4.94486	0.000439151	0.00258316	Up
lnc-MSTRG.930.3	0.78	0.00666667	-6.87036	0.000441197	0.00259118	Down
lnc-MSTRG.24241.1	0.993333	0.001	-9.95613	0.000441904	0.00259132	Down
lnc-MSTRG.20655.1	1.47667	0.06	-4.62124	0.000443017	0.00259384	Down
lnc-MSTRG.12248.1	0.693333	4.98333	2.84549	0.00044827	0.00262055	Up
lnc-MSTRG.21736.2	0.04	1.49	5.21917	0.000459939	0.00268463	Up
lnc-MSTRG.19203.1	0.001	1.15333	10.1716	0.000467768	0.00272613	Up
lnc-MSTRG.2427.1	4	0.123333	-5.01937	0.000473883	0.00275753	Down
lnc-MSTRG.10124.1	0.766667	0.001	-9.58246	0.00048535	0.00281994	Down
lnc-MSTRG.29753.1	0.293333	0.001	-8.1964	0.000487133	0.00282596	Down
lnc-MSTRG.3108.1	0.973333	0.001	-9.92679	0.000498041	0.00288122	Down
lnc-MSTRG.8060.1	0.001	0.94	9.87652	0.000498177	0.00288122	Up
lnc-MSTRG.12045.1	0.983333	0.001	-9.94154	0.000502803	0.00289914	Down
lnc-MSTRG.23431.2	1.77	0.001	-10.7895	0.000502803	0.00289914	Down
lnc-MSTRG.22160.1	4.53	1.31333	-1.78628	0.000506933	0.00291852	Down
lnc-MSTRG.18057.1	35.24	5.94	-2.56868	0.000522715	0.00300482	Down
lnc-MSTRG.20661.1	1.28667	0.001	-10.3294	0.000528471	0.00303331	Down
lnc-MSTRG.29344.1	1.67667	0.153333	-3.45085	0.000532276	0.00305054	Down
lnc-MSTRG.2365.1	0.0466667	1.17	4.64797	0.000533264	0.00305159	Up
lnc-MSTRG.28506.1	0.001	1.25333	10.2916	0.000547257	0.00312695	Up
lnc-MSTRG.32152.1	4.56333	0.38	-3.58602	0.000550209	0.00313909	Down
lnc-MSTRG.24306.1	0.0966667	2.23333	4.53004	0.000571499	0.00325229	Up
lnc-MSTRG.184.2	0.0366667	1.29667	5.14419	0.000571766	0.00325229	Up
lnc-MSTRG.19714.3	0.293333	6.52	4.47426	0.000577093	0.00327768	Up
lnc-MSTRG.4702.1	0.263333	2.91333	3.46771	0.000587253	0.0033236	Up
lnc-MSTRG.27752.2	3.48	0.776667	-2.16372	0.000587477	0.0033236	Down
lnc-MSTRG.29321.1	0.001	1.25	10.2877	0.00058851	0.0033236	Up
lnc-MSTRG.16130.1	2.04333	0.223333	-3.19365	0.000588682	0.0033236	Down
lnc-MSTRG.5405.1	0.12	1.98667	4.04924	0.000589808	0.00332501	Up
lnc-MSTRG.27999.3	0.02	0.846667	5.40372	0.000604387	0.00340064	Up
lnc-MSTRG.3468.1	3337.02	990.263	-1.75267	0.000605016	0.00340064	Down
lnc-MSTRG.11753.2	0.001	1.50667	10.5571	0.000606193	0.00340222	Up
lnc-MSTRG.28364.1	29.8733	6.26	-2.25462	0.000607101	0.00340228	Down
lnc-MSTRG.17619.1	1.91333	0.001	-10.9019	0.000610111	0.0034141	Down
lnc-MSTRG.15900.2	0.863333	4.19667	2.28125	0.000621469	0.00347254	Up
lnc-MSTRG.3403.1	0.001	0.86	9.74819	0.000625763	0.00348791	Up
lnc-MSTRG.9135.1	3.72667	0.476667	-2.96683	0.000626059	0.00348791	Down
lnc-MSTRG.4445.2	3.82	9.54333	1.32092	0.000627366	0.00349007	Up
lnc-MSTRG.28720.1	3.66333	11.9867	1.7102	0.000629872	0.00349888	Up
lnc-MSTRG.16572.1	0.616667	0.0166667	-5.20945	0.000639125	0.00354509	Down
lnc-MSTRG.11462.1	1.34333	0.001	-10.3916	0.000641597	0.00355361	Down
lnc-MSTRG.21304.1	4.14	10.93	1.40059	0.000643395	0.00355837	Up
lnc-MSTRG.18151.1	1.72	0.156667	-3.45664	0.000650122	0.00359034	Down
lnc-MSTRG.18733.1	0.79	0.1	-2.98185	0.000651291	0.00359157	Down
lnc-MSTRG.7896.1	0.453333	4.96667	3.45363	0.000663272	0.00365233	Up
lnc-MSTRG.7859.1	1.32	0.0666667	-4.30743	0.000667523	0.00367041	Down
lnc-MSTRG.15424.1	1.44333	0.001	-10.4952	0.000674491	0.00370336	Down
lnc-MSTRG.18153.1	1.95	0.116667	-4.06301	0.000696081	0.00381125	Down
lnc-MSTRG.28653.1	0.0966667	2.4	4.63387	0.000696151	0.00381125	Up
lnc-MSTRG.565.1	4.98	0.586667	-3.08553	0.000699977	0.00382667	Down
lnc-MSTRG.23027.1	1.12667	0.001	-10.1378	0.000711518	0.00388417	Down
lnc-MSTRG.11888.1	0.923333	0.163333	-2.49903	0.000715301	0.00389921	Down
lnc-MSTRG.31158.1	21.8633	1.46	-3.90447	0.00072893	0.0039678	Down
lnc-MSTRG.660.1	0.001	0.763333	9.57617	0.000731828	0.00397787	Up
lnc-MSTRG.18143.1	0.536667	0.001	-9.06788	0.000736746	0.00399888	Down
lnc-MSTRG.16782.1	2.08667	0.1	-4.38313	0.000748979	0.00405946	Down
lnc-MSTRG.6961.1	1.49	0.143333	-3.37787	0.000761653	0.00412227	Down
lnc-MSTRG.5500.1	0.976667	0.12	-3.02483	0.000763086	0.00412414	Down
lnc-MSTRG.16083.1	0.716667	0.0233333	-4.94084	0.000775248	0.00418391	Down
lnc-MSTRG.32053.1	0.18	1.12	2.63743	0.000779097	0.00419872	Up
lnc-MSTRG.118.4	0.46	2.78	2.59538	0.000794117	0.00427359	Up
lnc-MSTRG.6384.2	1.95333	0.0966667	-4.33678	0.000800756	0.00430322	Down
lnc-MSTRG.1469.1	1.06	0.001	-10.0498	0.000805562	0.00432292	Down
lnc-MSTRG.29844.1	0.936667	0.153333	-2.61086	0.000811602	0.00434537	Down
lnc-MSTRG.29802.2	0.1	2.31333	4.5319	0.000812037	0.00434537	Up
lnc-MSTRG.28536.2	0.001	1.24	10.2761	0.000823216	0.00439899	Up
lnc-MSTRG.22520.1	0.001	1.44667	10.4985	0.000828604	0.00442155	Up
lnc-MSTRG.17832.1	0.0566667	0.923333	4.02628	0.00083498	0.00444932	Up
lnc-MSTRG.7047.3	0.956667	4.80667	2.32895	0.000842683	0.00448406	Up
lnc-MSTRG.5416.2	1.57667	5.32333	1.75545	0.000852683	0.00452976	Up
lnc-MSTRG.20597.1	0.001	0.99	9.95128	0.000853659	0.00452976	Up
lnc-MSTRG.14161.3	3.22667	0.563333	-2.51798	0.000861594	0.00456549	Down
lnc-MSTRG.5969.1	4.38	0.29	-3.91681	0.000870417	0.00460581	Down
lnc-MSTRG.20287.1	1.60667	0.0433333	-5.21245	0.000880735	0.00465391	Down
lnc-MSTRG.30349.1	1.06	0.21	-2.3356	0.000896576	0.00473103	Down
lnc-MSTRG.16326.1	0.0466667	1.29	4.78883	0.000903267	0.00475972	Up
lnc-MSTRG.34159.1	1.06667	0.223333	-2.25584	0.000907373	0.00477472	Down
lnc-MSTRG.10964.1	0.02	0.996667	5.63904	0.000948378	0.00498358	Up
lnc-MSTRG.2814.1	2.24	0.13	-4.10692	0.000959447	0.00503379	Down
lnc-MSTRG.26239.1	0.246667	1.41667	2.52187	0.000960587	0.00503379	Up
lnc-MSTRG.28975.1	0.02	0.796667	5.3159	0.00097405	0.00509731	Up
lnc-MSTRG.21151.1	1.25667	0.253333	-2.31049	0.0009818	0.00513078	Down
lnc-MSTRG.5884.1	0.001	0.813333	9.6677	0.000984649	0.00513543	Up
lnc-MSTRG.15984.1	3.77667	0.126667	-4.898	0.000985396	0.00513543	Down
lnc-MSTRG.21841.3	0.02	1.19333	5.89885	0.00099849	0.00519627	Up
lnc-MSTRG.33338.1	0.176667	1.87667	3.40907	0.000999809	0.00519627	Up
lnc-MSTRG.7635.1	0.0533333	2.47	5.53333	0.00100641	0.00522341	Up
lnc-MSTRG.27136.2	4.61667	1.21333	-1.92788	0.00101133	0.00524178	Down
lnc-MSTRG.18125.1	0.246667	1.18	2.25815	0.00104195	0.00539312	Up
lnc-MSTRG.13294.1	0.0133333	0.67	5.65105	0.00105707	0.00546393	Up
lnc-MSTRG.9227.2	1.66667	0.386667	-2.1078	0.00106216	0.00548278	Down
lnc-MSTRG.173.1	0.503333	0.001	-8.97537	0.00106815	0.00550619	Down
lnc-MSTRG.12664.5	0.0933333	0.94	3.3322	0.00107576	0.00553789	Up
lnc-MSTRG.22753.1	2.7	0.306667	-3.13822	0.00107981	0.00555124	Down
lnc-MSTRG.20496.1	28.7067	75.5267	1.3956	0.00108501	0.00556744	Up
lnc-MSTRG.30971.1	0.646667	0.001	-9.33688	0.0010859	0.00556744	Down
lnc-MSTRG.33659.1	1.08	0.16	-2.75489	0.00108768	0.00556903	Down
lnc-MSTRG.19430.2	1.06	0.01	-6.72792	0.0010909	0.00557801	Down
lnc-MSTRG.26272.1	2.46	0.806667	-1.60861	0.00109445	0.00558861	Down
lnc-MSTRG.19742.1	1.38333	0.001	-10.4339	0.00110197	0.00561946	Down
lnc-MSTRG.28721.1	1.29667	4.1	1.66082	0.00110844	0.00564487	Up
lnc-MSTRG.18015.1	2.60667	1.03	-1.33956	0.00111918	0.00569192	Down
lnc-MSTRG.28722.1	2.42333	0.23	-3.39729	0.00113651	0.00577234	Down
lnc-MSTRG.34508.1	5.33667	16.1433	1.59693	0.00117608	0.00596532	Up
lnc-MSTRG.6752.1	1.31667	0.001	-10.3627	0.0011983	0.00606988	Down
lnc-MSTRG.4509.1	2.78333	0.91	-1.61288	0.00123899	0.00626762	Down
lnc-MSTRG.9180.1	0.0866667	1.21333	3.80735	0.00125805	0.0063556	Up
lnc-MSTRG.22110.1	0.86	3.21333	1.90166	0.00129879	0.00655004	Up
lnc-MSTRG.7648.1	1.02	0.001	-9.99435	0.00129999	0.00655004	Down
lnc-MSTRG.902.1	0.336667	3.14	3.22137	0.00131018	0.0065896	Up
lnc-MSTRG.630.3	9	52.8333	2.55345	0.00131132	0.0065896	Up
lnc-MSTRG.4480.1	5.12	0.42	-3.60768	0.00131526	0.00660065	Down
lnc-MSTRG.6117.2	0.913333	0.06	-3.92811	0.00134062	0.00671393	Down
lnc-MSTRG.5582.1	1.02333	0.001	-9.99906	0.00134137	0.00671393	Down
lnc-MSTRG.15630.1	0.366667	1.21667	1.73039	0.00134555	0.00672597	Up
lnc-MSTRG.12246.1	0.28	1.83667	2.71359	0.00134819	0.00673029	Up
lnc-MSTRG.2185.1	0.9	0.06	-3.90689	0.00135861	0.00677341	Down
lnc-MSTRG.16467.1	1.25333	0.39	-1.68422	0.00136573	0.00679997	Down
lnc-MSTRG.34267.1	2.59333	1.21667	-1.09187	0.0013699	0.00681177	Down
lnc-MSTRG.13258.1	0.793333	0.001	-9.63178	0.00146059	0.00725324	Down
lnc-MSTRG.9476.1	1.32	0.0266667	-5.62936	0.00146744	0.00727771	Down
lnc-MSTRG.17895.1	0.25	0.001	-7.96578	0.0015119	0.00748843	Down
lnc-MSTRG.26332.1	0.83	0.001	-9.69697	0.0015201	0.00751	Down
lnc-MSTRG.21301.1	0.001	1.64667	10.6853	0.00152127	0.00751	Up
lnc-MSTRG.5475.1	0.001	0.946667	9.88671	0.00152434	0.00751	Up
lnc-MSTRG.2489.1	0.136667	4.48333	5.03584	0.00152579	0.00751	Up
lnc-MSTRG.14161.1	0.906667	0.0266667	-5.08746	0.00152615	0.00751	Down
lnc-MSTRG.31556.1	3.72333	0.12	-4.95549	0.00154004	0.00756854	Down
lnc-MSTRG.10178.1	2.59	0.196667	-3.71913	0.00154706	0.00759321	Down
lnc-MSTRG.19.1	0.293333	2.34333	2.99795	0.00156333	0.00765348	Up
lnc-MSTRG.1402.1	0.001	1.13667	10.1506	0.00156337	0.00765348	Up
lnc-MSTRG.15736.1	0.001	1.84667	10.8507	0.00157039	0.00767791	Up
lnc-MSTRG.14251.1	0.0333333	1.09	5.03122	0.00157442	0.00768773	Up
lnc-MSTRG.28365.1	0.783333	0.04	-4.29155	0.00158617	0.00773514	Down
lnc-MSTRG.17349.1	1.28333	0.113333	-3.50125	0.00159981	0.00779161	Down
lnc-MSTRG.23809.1	0.523333	2.05667	1.97451	0.00160634	0.00781338	Up
lnc-MSTRG.11558.1	2.87333	0.633333	-2.18169	0.00161359	0.00783862	Down
lnc-MSTRG.4021.1	0.713333	0.0233333	-4.93411	0.00162708	0.00789404	Down
lnc-MSTRG.12962.3	0.396667	2.14	2.43161	0.00163327	0.00791394	Up
lnc-MSTRG.10006.1	0.001	1.19667	10.2248	0.0016396	0.00793448	Up
lnc-MSTRG.10432.1	1.23667	4.69	1.92313	0.00165014	0.00797532	Up
lnc-MSTRG.26397.2	1.16667	4.51	1.95074	0.00166095	0.0080077	Up
lnc-MSTRG.24699.1	5.78333	0.156667	-5.20613	0.00166106	0.0080077	Down
lnc-MSTRG.27691.1	2.15333	13.2533	2.62171	0.00167112	0.00804595	Up
lnc-MSTRG.11940.1	0.0266667	1.02333	5.26209	0.00169586	0.00815473	Up
lnc-MSTRG.31899.1	2.17333	0.246667	-3.13927	0.00170594	0.00819281	Down
lnc-MSTRG.7023.1	2.80667	1.08667	-1.36895	0.00171138	0.00820526	Down
lnc-MSTRG.30286.1	3.04333	50.3567	4.04846	0.00171285	0.00820526	Up
lnc-MSTRG.8740.1	0.0433333	1.31	4.91795	0.00172177	0.00823755	Up
lnc-MSTRG.17629.1	0.001	1.06667	10.0589	0.00172599	0.00824735	Up
lnc-MSTRG.2825.1	0.06	1.38333	4.52704	0.00176111	0.00840457	Up
lnc-MSTRG.1976.2	1.50333	0.356667	-2.07552	0.00176719	0.00841459	Down
lnc-MSTRG.12213.1	0.723333	0.0133333	-5.76155	0.00176764	0.00841459	Down
lnc-MSTRG.29263.1	0.001	1.33333	10.3808	0.0018582	0.00883461	Up
lnc-MSTRG.29467.2	0.0333333	0.83	4.63807	0.00186715	0.00886304	Up
lnc-MSTRG.30458.1	10.4467	3.57667	-1.54636	0.00186886	0.00886304	Down
lnc-MSTRG.21671.3	0.001	1.74667	10.7704	0.00189066	0.00895524	Up
lnc-MSTRG.30054.1	0.706667	0.0433333	-4.02748	0.00189688	0.00897352	Down
lnc-MSTRG.28368.1	13.2733	3.13	-2.0843	0.00190992	0.00902397	Down
lnc-MSTRG.25174.1	0.001	1.01667	9.98963	0.00192734	0.00909492	Up
lnc-MSTRG.9509.1	2.80667	0.303333	-3.20988	0.00193415	0.00911575	Down
lnc-MSTRG.24025.1	4.15667	12.75	1.617	0.00195517	0.00919922	Up
lnc-MSTRG.12379.1	2.27333	0.553333	-2.03859	0.00195671	0.00919922	Down
lnc-MSTRG.32962.1	2.27	0.1	-4.50462	0.00196316	0.00921811	Down
lnc-MSTRG.4263.1	3.79333	1.10667	-1.77725	0.00197181	0.00924727	Down
lnc-MSTRG.19787.1	0.8	3.22	2.00899	0.00197683	0.00925937	Up
lnc-MSTRG.443.1	0.0466667	1.60667	5.10553	0.0019931	0.00932405	Up
lnc-MSTRG.11612.1	3.95667	1.4	-1.49886	0.00201286	0.00940491	Down
lnc-MSTRG.24719.1	0.29	2.78	3.26096	0.00205952	0.00961111	Up
lnc-MSTRG.28651.1	9.33333	2.05	-2.18677	0.00206941	0.00963779	Down
lnc-MSTRG.662.1	0.946667	0.001	-9.88671	0.00207032	0.00963779	Down
lnc-MSTRG.28374.1	6.16	2.4	-1.3599	0.00209584	0.00974464	Down
lnc-MSTRG.10644.1	2.06667	0.0466667	-5.46877	0.00211545	0.00982378	Down
lnc-MSTRG.15809.1	0.78	0.0166667	-5.54844	0.00212124	0.00983862	Down
lnc-MSTRG.16003.1	0.001	1.05333	10.0407	0.00213093	0.00987149	Up
lnc-MSTRG.7447.1	0.91	2.58	1.50343	0.00213568	0.00988142	Up
lnc-MSTRG.32041.1	1.22667	0.0533333	-4.52356	0.0021599	0.00997972	Down
lnc-MSTRG.7386.1	1.03333	0.001	-10.0131	0.00216218	0.00997972	Down
lnc-MSTRG.5384.1	0.11	1.43667	3.70715	0.00218624	0.0100698	Up
lnc-MSTRG.97.1	4.81	16.4667	1.77544	0.00218701	0.0100698	Up
lnc-MSTRG.6123.1	0.49	0.001	-8.93664	0.00219833	0.0101097	Down
lnc-MSTRG.30019.1	6.23667	0.78	-2.99923	0.00220955	0.0101489	Down
lnc-MSTRG.30533.1	1.61667	0.001	-10.6588	0.00222578	0.0102111	Down
lnc-MSTRG.16340.1	0.04	1.01333	4.66297	0.00225017	0.0103106	Up
lnc-MSTRG.2897.1	0.12	2.10667	4.13386	0.00230287	0.0105393	Up
lnc-MSTRG.24427.1	1.94	9.87333	2.34748	0.00234147	0.010703	Up
lnc-MSTRG.12919.1	1.29	0.001	-10.3332	0.00235007	0.0107295	Down
lnc-MSTRG.9851.1	13.92	5.14	-1.43732	0.00237575	0.0108336	Down
lnc-MSTRG.10003.2	0.0233333	2.80667	6.91032	0.00239072	0.0108817	Up
lnc-MSTRG.10769.2	1.50667	0.163333	-3.20547	0.00239202	0.0108817	Down
lnc-MSTRG.21478.1	0.52	0.05	-3.37851	0.00242296	0.0110092	Down
lnc-MSTRG.23660.1	0.26	1.74667	2.74802	0.00243359	0.0110443	Up
lnc-MSTRG.4768.2	2.77	8.59333	1.63333	0.00244238	0.0110709	Up
lnc-MSTRG.20620.1	0.02	0.903333	5.49719	0.00244728	0.0110799	Up
lnc-MSTRG.23487.1	0.001	1.25333	10.2916	0.00246058	0.0111269	Up
lnc-MSTRG.22058.1	0.13	1.06	3.02748	0.002476	0.0111833	Up
lnc-MSTRG.20997.1	0.71	3.27333	2.20487	0.00251494	0.0113456	Up
lnc-MSTRG.24324.1	0.216667	1.11667	2.36565	0.00252843	0.011393	Up
lnc-MSTRG.28697.1	0.0566667	1.6	4.81943	0.00253308	0.0114004	Up
lnc-MSTRG.21419.1	1.12	0.001	-10.1293	0.00255934	0.0115049	Down
lnc-MSTRG.24324.2	0.03	0.66	4.45943	0.00258659	0.0116137	Up
lnc-MSTRG.26474.2	3.55667	0.24	-3.88942	0.00263289	0.0118076	Down
lnc-MSTRG.2493.1	0.823333	0.0233333	-5.14101	0.00268866	0.0120434	Down
lnc-MSTRG.8197.2	0.736667	0.166667	-2.14405	0.00276656	0.0123777	Down
lnc-MSTRG.17827.1	2.32	7.01	1.59529	0.00280324	0.0125271	Up
lnc-MSTRG.11045.1	0.001	1.47	10.5216	0.00282063	0.01259	Up
lnc-MSTRG.15819.1	0.206667	1.05333	2.34958	0.00283435	0.0126363	Up
lnc-MSTRG.16645.1	0.81	0.001	-9.66178	0.00286663	0.0127653	Down
lnc-MSTRG.26059.2	0.29	1.13	1.9622	0.00287993	0.0128094	Up
lnc-MSTRG.9206.1	0.483333	4.30333	3.15436	0.00288996	0.0128271	Up
lnc-MSTRG.27149.1	1.04	0.306667	-1.76184	0.00289065	0.0128271	Down
lnc-MSTRG.19298.1	0.21	2.43	3.5325	0.00293322	0.0130007	Up
lnc-MSTRG.19819.2	1.55667	0.0466667	-5.05992	0.00293768	0.0130053	Down
lnc-MSTRG.4990.1	0.936667	0.001	-9.87139	0.00294903	0.0130403	Down
lnc-MSTRG.24331.1	6.62667	1.33333	-2.31325	0.00295508	0.0130519	Down
lnc-MSTRG.26617.1	1.36667	0.001	-10.4164	0.00300696	0.0132656	Down
lnc-MSTRG.23292.1	0.473333	0.02	-4.56478	0.00302954	0.0133497	Down
lnc-MSTRG.18381.2	0.546667	2.05	1.90689	0.00306398	0.0134858	Up
lnc-MSTRG.33559.1	1.45333	0.186667	-2.96083	0.00312969	0.0137591	Down
lnc-MSTRG.27029.2	1.24667	0.113333	-3.45943	0.00314723	0.0138201	Down
lnc-MSTRG.21486.1	0.843333	4.93333	2.54839	0.00315411	0.0138343	Up
lnc-MSTRG.9162.3	1.84333	0.31	-2.57198	0.00316521	0.013867	Down
lnc-MSTRG.30375.1	0.153333	3.05667	4.31722	0.00317219	0.0138815	Up
lnc-MSTRG.2841.1	0.776667	4.46667	2.52383	0.00318092	0.0139037	Up
lnc-MSTRG.11956.3	0.48	1.72	1.8413	0.00321433	0.0140336	Up
lnc-MSTRG.22743.1	1.33667	5.40333	2.01521	0.00325139	0.014179	Up
lnc-MSTRG.8088.1	0.81	0.0466667	-4.11746	0.00325703	0.0141874	Down
lnc-MSTRG.27726.3	1.08667	3.39	1.64138	0.00330244	0.0143687	Up
lnc-MSTRG.1619.2	2.67667	0.65	-2.04193	0.00331288	0.0143975	Down
lnc-MSTRG.32698.1	0.483333	0.001	-8.91687	0.00335681	0.0145718	Down
lnc-MSTRG.23396.1	1.01333	3.2	1.65896	0.00337569	0.014637	Up
lnc-MSTRG.2465.1	1.07333	4.22667	1.97742	0.00339157	0.0146739	Up
lnc-MSTRG.18349.6	2.17667	0.666667	-1.70708	0.00339193	0.0146739	Down
lnc-MSTRG.11709.3	0.001	0.686667	9.42347	0.00339824	0.0146844	Up
lnc-MSTRG.28129.1	0.946667	0.07	-3.75743	0.0034739	0.0149943	Down
lnc-MSTRG.170.1	0.996667	0.001	-9.96097	0.00349703	0.015077	Down
lnc-MSTRG.19042.1	2.03667	0.166667	-3.61117	0.00352881	0.0151967	Down
lnc-MSTRG.24786.1	0.001	0.563333	9.13785	0.00353399	0.0152018	Up
lnc-MSTRG.30845.1	8.10333	0.293333	-4.7879	0.00357727	0.0153537	Down
lnc-MSTRG.23584.1	0.001	1.07667	10.0724	0.0035774	0.0153537	Up
lnc-MSTRG.17105.2	0.403333	2.16	2.42099	0.00359515	0.0154124	Up
lnc-MSTRG.31116.1	0.001	1.23333	10.2683	0.00362185	0.0155093	Up
lnc-MSTRG.6186.1	6.72667	3.39333	-0.987189	0.00365045	0.0155994	No
lnc-MSTRG.13416.2	1.16667	3.54	1.60136	0.00365109	0.0155994	Up
lnc-MSTRG.4851.2	0.386667	1.78333	2.20541	0.00365545	0.0156004	Up
lnc-MSTRG.10803.2	1.60667	0.516667	-1.63676	0.00368557	0.0157113	Down
lnc-MSTRG.3749.1	0.001	1.14333	10.159	0.00372733	0.0158715	Up
lnc-MSTRG.10366.2	6.53667	17.0567	1.38371	0.00375382	0.0159664	Up
lnc-MSTRG.184.3	1.32333	3.33	1.33135	0.00382134	0.0162231	Up
lnc-MSTRG.24968.1	0.0333333	0.933333	4.80735	0.00382273	0.0162231	Up
lnc-MSTRG.32946.1	0.19	1.59333	3.06798	0.00386734	0.0163941	Up
lnc-MSTRG.4110.1	0.001	1.08	10.0768	0.00387574	0.0164113	Up
lnc-MSTRG.5757.2	0.3	1.96	2.70782	0.00388667	0.0164393	Up
lnc-MSTRG.15341.1	0.94	0.001	-9.87652	0.00389454	0.0164542	Down
lnc-MSTRG.28749.3	0.86	0.001	-9.74819	0.00391275	0.0165128	Down
lnc-MSTRG.10371.4	1.79333	0.483333	-1.89155	0.00394002	0.0166094	Down
lnc-MSTRG.6634.1	1.49667	4.91667	1.71593	0.00394512	0.0166124	Up
lnc-MSTRG.16815.2	8.23667	3.9	-1.07859	0.00395033	0.0166159	Down
lnc-MSTRG.29531.2	10.8	1.16333	-3.21469	0.004004	0.016823	Down
lnc-MSTRG.34083.1	0.001	1.26	10.2992	0.00401363	0.0168448	Up
lnc-MSTRG.26127.1	0.001	1.57333	10.6196	0.00403138	0.0168815	Up
lnc-MSTRG.1727.1	0.001	0.56	9.12928	0.00403319	0.0168815	Up
lnc-MSTRG.28605.1	1.36333	0.0666667	-4.35403	0.00403798	0.0168815	Down
lnc-MSTRG.31531.3	1.19333	0.001	-10.2208	0.00404016	0.0168815	Down
lnc-MSTRG.18048.2	0.08	1.51333	4.24159	0.00405395	0.0169204	Up
lnc-MSTRG.28008.2	0.213333	1.49667	2.81057	0.00406791	0.0169541	Up
lnc-MSTRG.8496.2	0.573333	2.35667	2.0393	0.00407095	0.0169541	Up
lnc-MSTRG.32256.2	0.886667	3.27667	1.88577	0.00409444	0.0170211	Up
lnc-MSTRG.24242.3	1.56	5.12	1.7146	0.004096	0.0170211	Up
lnc-MSTRG.1111.1	27.8933	10.1467	-1.45891	0.00419733	0.0174231	Down
lnc-MSTRG.1384.1	0.0766667	1.05333	3.78022	0.00423081	0.0175428	Up
lnc-MSTRG.8364.1	0.303333	2.28	2.91006	0.004247	0.0175907	Up
lnc-MSTRG.27107.2	0.42	2.09333	2.31734	0.00429882	0.017786	Up
lnc-MSTRG.26312.1	0.001	1.18667	10.2127	0.00432181	0.0178499	Up
lnc-MSTRG.21807.1	6.93	2.15667	-1.68405	0.00432368	0.0178499	Down
lnc-MSTRG.3364.1	1.08333	0.1	-3.43741	0.00436307	0.0179929	Down
lnc-MSTRG.20371.1	1.14333	0.001	-10.159	0.00438611	0.0180683	Down
lnc-MSTRG.4591.1	1.53	0.001	-10.5793	0.00440226	0.0181151	Down
lnc-MSTRG.17034.1	0.4	0.001	-8.64386	0.00442158	0.0181749	Down
lnc-MSTRG.15004.1	2.96	0.923333	-1.68067	0.00444553	0.0182536	Down
lnc-MSTRG.16366.2	0.0633333	1.50667	4.57225	0.00451753	0.0185292	Up
lnc-MSTRG.11858.1	0.103333	1.44	3.80069	0.00457778	0.0187561	Up
lnc-MSTRG.9134.1	1.42667	0.1	-3.83458	0.00458469	0.0187641	Down
lnc-MSTRG.13941.1	0.001	0.836667	9.70851	0.00465512	0.0190318	Up
lnc-MSTRG.26580.1	0.103333	1.32	3.67516	0.00467834	0.0191061	Up
lnc-MSTRG.10916.2	0.27	2.02	2.90332	0.0046994	0.0191715	Up
lnc-MSTRG.10725.1	0.53	2.12333	2.00227	0.00473814	0.0193088	Up
lnc-MSTRG.10803.1	0.773333	0.236667	-1.70823	0.00477052	0.0194199	Down
lnc-MSTRG.14517.3	0.9	0.001	-9.81378	0.00477968	0.0194363	Down
lnc-MSTRG.4274.1	0.001	1.15333	10.1716	0.00478891	0.019453	Up
lnc-MSTRG.7063.1	1.49667	0.06	-4.64065	0.00485806	0.0197128	Down
lnc-MSTRG.11066.1	3.71333	0.93	-1.99741	0.00489332	0.0198347	Down
lnc-MSTRG.15516.1	0.723333	4.53	2.64678	0.00498309	0.020177	Up
lnc-MSTRG.49.1	0.3	1.83	2.60881	0.00499742	0.0202134	Up
lnc-MSTRG.5728.1	1.35	0.156667	-3.10719	0.00501475	0.0202619	Down
lnc-MSTRG.21023.2	1.84333	0.703333	-1.39004	0.00503738	0.0203317	Down
lnc-MSTRG.28377.1	0.0166667	0.626667	5.23266	0.00506646	0.0204273	Up
lnc-MSTRG.30208.1	1.54667	0.001	-10.5949	0.00508259	0.0204707	Down
lnc-MSTRG.16231.1	0.001	1.39	10.4409	0.00511736	0.0205888	Up
lnc-MSTRG.29599.1	0.86	0.001	-9.74819	0.00514784	0.0206895	Down
lnc-MSTRG.29907.1	0.001	0.63	9.29921	0.00515876	0.0207115	Up
lnc-MSTRG.7592.1	0.02	0.826667	5.36923	0.0053358	0.0213996	Up
lnc-MSTRG.16700.1	2.55667	0.163333	-3.96837	0.00534351	0.0214079	Down
lnc-MSTRG.7242.1	8.5	26.7533	1.65418	0.0053789	0.021527	Up
lnc-MSTRG.8012.1	0.51	0.001	-8.99435	0.0053924	0.0215582	Down
lnc-MSTRG.399.1	3.82333	0.79	-2.27491	0.00541625	0.0216308	Down
lnc-MSTRG.33734.1	0.02	0.786667	5.29768	0.00547511	0.0218429	Up
lnc-MSTRG.31690.1	0.001	2.51	11.2935	0.0054923	0.0218884	Up
lnc-MSTRG.31302.1	1.05	0.001	-10.0362	0.00557541	0.0221963	Down
lnc-MSTRG.9949.1	0.903333	0.001	-9.81911	0.00560582	0.022294	Down
lnc-MSTRG.8952.1	1.27667	0.0666667	-4.25927	0.0056166	0.0223135	Down
lnc-MSTRG.866.1	0.36	1.34333	1.89975	0.00562781	0.0223346	Up
lnc-MSTRG.21197.1	0.856667	6.36	2.89222	0.00564478	0.0223786	Up
lnc-MSTRG.31554.1	1.77333	0.001	-10.7922	0.00568257	0.0225049	Down
lnc-MSTRG.3393.3	0.446667	1.35667	1.6028	0.00573407	0.0226852	Up
lnc-MSTRG.23985.1	0.04	0.613333	3.9386	0.00577303	0.0228155	Up
lnc-MSTRG.431.1	1.08667	0.001	-10.0857	0.00578607	0.0228433	Down
lnc-MSTRG.5078.1	3.39333	1.06	-1.67864	0.00584937	0.0230691	Down
lnc-MSTRG.27762.1	0.293333	0.001	-8.1964	0.00587272	0.0231372	Down
lnc-MSTRG.11486.1	0.166667	1.83667	3.46205	0.00594554	0.0233998	Up
lnc-MSTRG.22081.1	0.203333	1.13333	2.47865	0.00596967	0.0234704	Up
lnc-MSTRG.33754.1	0.001	1.07	10.0634	0.00598456	0.0235046	Up
lnc-MSTRG.8809.1	0.001	1.41667	10.4683	0.00600921	0.0235612	Up
lnc-MSTRG.32324.1	0.81	0.001	-9.66178	0.00601615	0.0235612	Down
lnc-MSTRG.14136.1	0.09	0.533333	2.56704	0.0060176	0.0235612	Up
lnc-MSTRG.19182.1	0.76	4.85667	2.6759	0.00602686	0.0235731	Up
lnc-MSTRG.19584.1	1.74333	0.39	-2.1603	0.00608275	0.0237672	Down
lnc-MSTRG.33320.2	8.07	20.4233	1.33958	0.00613613	0.0239511	Up
lnc-MSTRG.15456.1	0.82	0.001	-9.67948	0.00626437	0.0244265	Down
lnc-MSTRG.4422.1	0.613333	0.001	-9.26053	0.00633649	0.0246824	Down
lnc-MSTRG.16221.1	1.68667	0.673333	-1.32478	0.00634394	0.0246861	Down
lnc-MSTRG.6728.1	1.32	0.08	-4.04439	0.00636135	0.0247285	Down
lnc-MSTRG.30595.1	1.12333	0.123333	-3.18715	0.00639752	0.0248436	Down
lnc-MSTRG.589.2	0.103333	0.76	2.87869	0.00644882	0.0250172	Up
lnc-MSTRG.32039.1	0.001	1.40333	10.4546	0.00646852	0.0250377	Up
lnc-MSTRG.26261.1	0.896667	0.001	-9.80843	0.00646913	0.0250377	Down
lnc-MSTRG.12465.1	0.001	0.493333	8.94642	0.00647389	0.0250377	Up
lnc-MSTRG.16112.6	0.0366667	0.75	4.35435	0.00651618	0.0251437	Up
lnc-MSTRG.13462.2	3.03	0.573333	-2.40187	0.00651913	0.0251437	Down
lnc-MSTRG.18607.1	1.10333	2.8	1.34356	0.0065212	0.0251437	Up
lnc-MSTRG.28110.1	1.35667	0.176667	-2.94096	0.0065967	0.0254004	Down
lnc-MSTRG.6709.1	0.11	1.04333	3.24562	0.00660115	0.0254004	Up
lnc-MSTRG.5991.1	0.876667	0.106667	-3.03892	0.00664229	0.0255328	Down
lnc-MSTRG.24988.4	1.01667	0.21	-2.27539	0.00669701	0.0257171	Down
lnc-MSTRG.4154.1	1.17	0.001	-10.1923	0.00672025	0.0257802	Down
lnc-MSTRG.28304.1	0.95	0.0666667	-3.83289	0.00678043	0.0259848	Down
lnc-MSTRG.19485.1	0.001	0.796667	9.63783	0.00680121	0.0260381	Up
lnc-MSTRG.23503.1	0.676667	2.65333	1.97129	0.00681006	0.0260457	Up
lnc-MSTRG.4903.1	0.001	0.99	9.95128	0.0068207	0.0260602	Up
lnc-MSTRG.21699.1	0.863333	2.74333	1.66794	0.00688848	0.0262927	Up
lnc-MSTRG.22502.1	0.7	0.001	-9.45121	0.00689957	0.0263085	Down
lnc-MSTRG.17990.1	22.1567	1.09	-4.34534	0.00692669	0.0263764	Down
lnc-MSTRG.32379.1	0.8	0.0366667	-4.44746	0.00693128	0.0263764	Down
lnc-MSTRG.23983.1	0.001	0.533333	9.05889	0.00697479	0.0265154	Up
lnc-MSTRG.16557.5	0.673333	2.08667	1.63181	0.00703258	0.0267083	Up
lnc-MSTRG.19698.2	0.48	0.0366667	-3.71049	0.00705889	0.0267814	Down
lnc-MSTRG.13462.1	0.886667	0.0466667	-4.24793	0.00718717	0.0272409	Down
lnc-MSTRG.12563.1	4.31	1.92	-1.16658	0.00730783	0.0276706	Down
lnc-MSTRG.23017.2	1.48	0.11	-3.75002	0.00733663	0.0277425	Down
lnc-MSTRG.1289.1	0.346667	0.001	-8.43741	0.00734734	0.0277425	Down
lnc-MSTRG.29288.1	0.001	0.736667	9.52487	0.00734997	0.0277425	Up
lnc-MSTRG.21673.1	0.001	0.99	9.95128	0.00735608	0.0277425	Up
lnc-MSTRG.22135.1	6.85	3.39	-1.01482	0.00737284	0.0277781	Down
lnc-MSTRG.6622.1	0.001	0.963333	9.91189	0.00742568	0.0279494	Up
lnc-MSTRG.3462.3	2.04667	0.38	-2.4292	0.0074818	0.0281328	Down
lnc-MSTRG.26336.1	1.96	0.001	-10.9366	0.00764749	0.0287273	Down
lnc-MSTRG.17023.1	0.001	1.78667	10.8031	0.0077145	0.0289504	Up
lnc-MSTRG.23513.1	1.89333	4.26	1.16993	0.00778124	0.029172	Up
lnc-MSTRG.6746.1	0.0833333	1.42667	4.09761	0.00780871	0.0292461	Up
lnc-MSTRG.20519.2	2.11667	0.683333	-1.63113	0.00786875	0.0294419	Down
lnc-MSTRG.21779.1	0.0366667	0.846667	4.52925	0.007888	0.0294848	Up
lnc-MSTRG.10215.1	0.0266667	0.91	5.09276	0.00795748	0.0297152	Up
lnc-MSTRG.31856.1	1.37333	0.28	-2.29418	0.00805533	0.0300511	Down
lnc-MSTRG.31533.1	1.81333	0.09	-4.33258	0.00808314	0.0301252	Down
lnc-MSTRG.18080.1	9.97333	22.41	1.16799	0.00811603	0.0302181	Up
lnc-MSTRG.27952.1	0.783333	0.001	-9.61348	0.00814173	0.030284	Down
lnc-MSTRG.34501.1	1.21333	0.13	-3.22239	0.008237	0.0306084	Down
lnc-MSTRG.14108.1	0.73	2.27	1.63672	0.00830038	0.030812	Up
lnc-MSTRG.29156.4	0.593333	0.001	-9.2127	0.00831562	0.030812	Down
lnc-MSTRG.7890.1	0.77	0.09	-3.09686	0.00831615	0.030812	Down
lnc-MSTRG.21438.1	0.0433333	0.723333	4.06111	0.00837779	0.0310101	Up
lnc-MSTRG.30687.1	0.001	0.726667	9.50515	0.00839098	0.0310286	Up
lnc-MSTRG.28696.1	0.0933333	1.88333	4.33475	0.00840466	0.031049	Up
lnc-MSTRG.15533.1	4.38333	10.46	1.25478	0.00846482	0.0312408	Up
lnc-MSTRG.28727.1	0.97	0.216667	-2.16251	0.00847778	0.0312582	Down
lnc-MSTRG.8364.2	0.24	1.82667	2.92811	0.00858936	0.0316389	Up
lnc-MSTRG.30237.1	0.183333	1.66333	3.18154	0.00866475	0.0318856	Up
lnc-MSTRG.25171.1	1.08333	0.3	-1.85244	0.0087164	0.0320446	Down
lnc-MSTRG.30609.1	0.533333	0.13	-2.03653	0.00874141	0.0321054	Down
lnc-MSTRG.11292.1	1.12333	3.28	1.54591	0.00881057	0.0323281	Up
lnc-MSTRG.8302.1	0.83	0.05	-4.05311	0.0088304	0.0323696	Down
lnc-MSTRG.552.1	0.001	1.07	10.0634	0.00887806	0.0325022	Up
lnc-MSTRG.24199.1	0.25	0.001	-7.96578	0.00888371	0.0325022	Down
lnc-MSTRG.16310.1	1.47333	5.52	1.90558	0.00890098	0.032534	Up
lnc-MSTRG.6959.1	1.16333	4.34333	1.90054	0.00896051	0.0327201	Up
lnc-MSTRG.14517.1	0.56	1.75	1.64386	0.00906891	0.0330841	Up
lnc-MSTRG.21484.1	0.07	1.03667	3.88845	0.00909898	0.0331619	Up
lnc-MSTRG.9431.1	1.88	4.27333	1.18463	0.00915145	0.0332996	Up
lnc-MSTRG.9045.1	2.24333	0.05	-5.48757	0.00915431	0.0332996	Down
lnc-MSTRG.16879.1	0.001	0.98	9.93664	0.00933852	0.0339371	Up
lnc-MSTRG.34509.1	0.846667	0.001	-9.72565	0.00940135	0.0341328	Down
lnc-MSTRG.6000.1	0.05	0.996667	4.31711	0.0094293	0.0342015	Up
lnc-MSTRG.30460.2	3.30333	8.19	1.30994	0.00945121	0.0342482	Up
lnc-MSTRG.27936.1	0.08	0.976667	3.60979	0.00952223	0.0344713	Up
lnc-MSTRG.27056.1	0.001	1.13	10.1421	0.00953094	0.0344713	Up
lnc-MSTRG.30597.1	0.001	0.753333	9.55714	0.00955603	0.0345063	Up
lnc-MSTRG.18214.1	2.68333	7.52	1.48671	0.0095588	0.0345063	Up
lnc-MSTRG.1704.1	0.6	0.001	-9.22882	0.00956973	0.0345129	Down
lnc-MSTRG.29666.2	0.123333	2.16667	4.13484	0.00958886	0.034549	Up
lnc-MSTRG.3834.1	0.001	0.99	9.95128	0.00962024	0.0346292	Up
lnc-MSTRG.16656.1	0.001	0.753333	9.55714	0.00973273	0.0350009	Up
lnc-MSTRG.32514.1	4.66667	1.05333	-2.14743	0.00979463	0.0351902	Down
lnc-MSTRG.6485.1	1.12333	2.81	1.32278	0.00982112	0.035252	Up
lnc-MSTRG.31986.1	1.15667	0.001	-10.1758	0.00992491	0.0355908	Down
lnc-MSTRG.22022.1	0.001	1.24667	10.2839	0.00996211	0.0356905	Up
lnc-MSTRG.9553.1	0.59	1.97	1.73941	0.00998662	0.0357445	Up
lnc-MSTRG.32562.1	0.001	1.07	10.0634	0.010007	0.0357838	Up
lnc-MSTRG.5893.1	0.0433333	0.86	4.31079	0.0100437	0.0358812	Up
lnc-MSTRG.9941.4	0.0433333	0.91	4.39232	0.010093	0.0360108	Up
lnc-MSTRG.10359.1	0.001	0.506667	8.98489	0.010099	0.0360108	Up
lnc-MSTRG.11404.1	0.683333	0.001	-9.41645	0.0101097	0.0360154	Down
lnc-MSTRG.2546.2	5.81	0.73	-2.99257	0.0101632	0.0361446	Down
lnc-MSTRG.10281.1	1.04333	0.001	-10.027	0.0101651	0.0361446	Down
lnc-MSTRG.2737.2	0.5	2.40667	2.26704	0.010195	0.036217	Up
lnc-MSTRG.33254.1	0.836667	0.166667	-2.32769	0.0102628	0.0364237	Down
lnc-MSTRG.15774.1	0.106667	1.36	3.67243	0.0103413	0.0366682	Up
lnc-MSTRG.22743.2	0.94	2.92667	1.63853	0.0104127	0.0368869	Up
lnc-MSTRG.3609.2	0.0166667	0.716667	5.42626	0.0104706	0.0370574	Up
lnc-MSTRG.21881.1	0.776667	0.126667	-2.61626	0.0104875	0.0370826	Down
lnc-MSTRG.10118.1	1.09	4.00667	1.87807	0.0105653	0.0373229	Up
lnc-MSTRG.26057.1	0.001	0.786667	9.61961	0.0106013	0.0374153	Up
lnc-MSTRG.34568.1	36.21	17.32	-1.06395	0.0106513	0.0375567	Down
lnc-MSTRG.21675.1	2.08	0.38	-2.45251	0.0106747	0.0376042	Down
lnc-MSTRG.25487.4	0.27	1.94333	2.8475	0.0108147	0.0380622	Up
lnc-MSTRG.19255.2	0.45	1.67667	1.8976	0.0108772	0.0382468	Up
lnc-MSTRG.7927.1	0.001	1.03	10.0084	0.0109439	0.0384234	Up
lnc-MSTRG.21604.1	0.001	0.876667	9.77588	0.0109477	0.0384234	Up
lnc-MSTRG.20068.1	0.186667	1.59	3.09049	0.010971	0.0384694	Up
lnc-MSTRG.32854.1	0.0966667	1.08667	3.49075	0.0110045	0.0384832	Up
lnc-MSTRG.4099.2	0.1	1.82	4.18587	0.0110083	0.0384832	Up
lnc-MSTRG.24089.1	0.74	0.001	-9.53138	0.0110136	0.0384832	Down
lnc-MSTRG.997.8	0.001	0.893333	9.80305	0.0110155	0.0384832	Up
lnc-MSTRG.2564.2	0.61	2.25333	1.88518	0.0110626	0.0386122	Up
lnc-MSTRG.8179.1	0.001	0.94	9.87652	0.0110781	0.0386307	Up
lnc-MSTRG.3629.1	0.943333	0.0466667	-4.3373	0.0111775	0.0389417	Down
lnc-MSTRG.31963.1	0.813333	0.0266667	-4.93074	0.0114442	0.0398341	Down
lnc-MSTRG.24755.4	0.943333	3.53667	1.90655	0.0114902	0.0399316	Up
lnc-MSTRG.19198.1	0.66	2.03	1.62094	0.0114932	0.0399316	Up
lnc-MSTRG.11753.1	0.473333	1.80333	1.92974	0.0115147	0.0399697	Up
lnc-MSTRG.15429.1	0.846667	0.04	-4.40372	0.0115999	0.0402286	Down
lnc-MSTRG.11673.1	0.466667	2.03667	2.12575	0.0116379	0.0402727	Up
lnc-MSTRG.13478.1	4.43667	1.89	-1.23109	0.0116393	0.0402727	Down
lnc-MSTRG.5693.1	1.19	0.001	-10.2167	0.0116445	0.0402727	Down
lnc-MSTRG.10308.1	0.08	0.633333	2.98489	0.0116566	0.0402778	Up
lnc-MSTRG.17672.1	0.62	0.001	-9.27612	0.0118286	0.040835	Down
lnc-MSTRG.23733.1	1.09333	3.58667	1.71391	0.0118593	0.0409038	Up
lnc-MSTRG.2641.1	0.05	0.796667	3.99398	0.0119487	0.0411747	Up
lnc-MSTRG.27673.2	1.27	0.17	-2.90122	0.0119611	0.0411802	Down
lnc-MSTRG.15118.1	0.7	0.0466667	-3.90689	0.0120651	0.0414672	Down
lnc-MSTRG.2638.1	0.001	1.76333	10.7841	0.0120664	0.0414672	Up
lnc-MSTRG.28362.1	1.44	0.243333	-2.56506	0.0121841	0.041834	Down
lnc-MSTRG.29802.1	1.94	5.28	1.44448	0.0122051	0.0418681	Up
lnc-MSTRG.32010.1	6.62667	16.2567	1.29468	0.0124049	0.0425152	Up
lnc-MSTRG.21315.1	0.463333	0.0766667	-2.59538	0.0124639	0.0426786	Down
lnc-MSTRG.18717.1	0.756667	0.001	-9.56351	0.012607	0.0430911	Down
lnc-MSTRG.33679.1	0.773333	0.001	-9.59495	0.012607	0.0430911	Down
lnc-MSTRG.23983.5	1.91	0.373333	-2.35504	0.0126607	0.0432355	Down
lnc-MSTRG.18795.1	0.796667	0.0466667	-4.09351	0.0127749	0.0435862	Down
lnc-MSTRG.16028.1	1.18333	0.06	-4.30175	0.0129071	0.0439879	Down
lnc-MSTRG.10739.1	1.51333	0.243333	-2.63672	0.0129158	0.0439879	Down
lnc-MSTRG.34523.1	1.19333	0.11	-3.43942	0.0129433	0.0440421	Down
lnc-MSTRG.23376.1	2.45667	0.66	-1.89616	0.0129549	0.0440421	Down
lnc-MSTRG.22447.1	0.696667	0.04	-4.1224	0.0129719	0.0440604	Down
lnc-MSTRG.4260.1	1.79333	0.776667	-1.20728	0.013111	0.0444931	Down
lnc-MSTRG.26052.1	2.78	1.24333	-1.16087	0.0132797	0.0450251	Down
lnc-MSTRG.4655.1	0.04	1.18667	4.89077	0.0133027	0.0450629	Up
lnc-MSTRG.32631.3	0.42	1.84667	2.13646	0.0133408	0.0451517	Up
lnc-MSTRG.1338.1	2.45667	7.5	1.61019	0.013392	0.0452846	Up
lnc-MSTRG.7176.1	0.173333	2.35	3.76104	0.0134211	0.0453426	Up
lnc-MSTRG.11042.1	0.143333	1.84	3.68226	0.0134532	0.0454106	Up
lnc-MSTRG.23809.2	0.893333	2.29667	1.36227	0.0135586	0.0457258	Up
lnc-MSTRG.33510.1	0.001	0.77	9.58871	0.013696	0.046148	Up
lnc-MSTRG.23417.1	0.103333	3.96667	5.26255	0.0137451	0.0462725	Up
lnc-MSTRG.29217.1	5.14	11.1633	1.11893	0.0137841	0.0463624	Up
lnc-MSTRG.1357.2	1.9	0.5	-1.926	0.0138122	0.0464107	Down
lnc-MSTRG.15750.1	1.55	0.001	-10.5981	0.0138307	0.0464107	Down
lnc-MSTRG.5739.1	0.0566667	1.08667	4.26127	0.0138351	0.0464107	Up
lnc-MSTRG.26486.1	0.18	1.09	2.59826	0.0138828	0.0464886	Up
lnc-MSTRG.28698.1	0.613333	4.59333	2.9048	0.0138829	0.0464886	Up
lnc-MSTRG.14032.4	3.07	0.803333	-1.93417	0.0140531	0.0470171	Down
lnc-MSTRG.12366.1	0.0433333	0.783333	4.17608	0.0141014	0.0471373	Up
lnc-MSTRG.28293.1	4.19333	11.08	1.40179	0.0141192	0.047155	Up
lnc-MSTRG.25022.1	1.56	5.75333	1.88285	0.0141812	0.0473206	Up
lnc-MSTRG.12230.3	0.373333	1.97	2.39966	0.0142929	0.0476513	Up
lnc-MSTRG.29710.15	2.91	7.76333	1.41566	0.0143244	0.0477144	Up
lnc-MSTRG.6429.1	0.08	0.92	3.52356	0.0143375	0.0477163	Up
lnc-MSTRG.21092.1	5.94333	13.6733	1.20202	0.0143561	0.0477363	Up
lnc-MSTRG.30062.1	1.71333	0.843333	-1.02263	0.0143733	0.0477516	Down
lnc-MSTRG.3358.2	0.676667	3.15667	2.22188	0.0144548	0.0479803	Up
lnc-MSTRG.16396.2	0.55	0.0233333	-4.55897	0.014489	0.0480517	Down
lnc-MSTRG.21119.1	0.001	0.803333	9.64985	0.0147354	0.0488202	Up
lnc-MSTRG.22120.1	0.65	0.0266667	-4.60733	0.0147464	0.0488202	Down
lnc-MSTRG.18562.3	0.001	0.6	9.22882	0.0148065	0.0489763	Up
lnc-MSTRG.1570.1	7.12667	2.26333	-1.65478	0.0148551	0.0490944	Down
lnc-MSTRG.4816.2	1.86333	4.85667	1.38208	0.01491	0.049233	Up
lnc-MSTRG.3538.1	1.19333	0.18	-2.72893	0.0149288	0.049252	Down
lnc-MSTRG.1152.1	0.376667	1.45	1.94469	0.0149937	0.0494158	Up
lnc-MSTRG.6817.1	0.001	0.94	9.87652	0.0150064	0.0494158	Up
lnc-MSTRG.13417.1	1.42333	0.0766667	-4.21453	0.0150175	0.0494158	Down
lnc-MSTRG.2904.1	0.576667	2.25	1.96412	0.0150764	0.0495667	Up
lnc-MSTRG.23317.1	0.05	1.11333	4.47681	0.0151944	0.0499113	Up
lnc-MSTRG.25457.1	4.1	0.0933333	-5.45709	0.0152654	0.0501011	Down
lnc-MSTRG.28722.2	1.24	0.07	-4.14684	0.0153278	0.0502624	Down
lnc-MSTRG.8088.2	0.001	0.333333	8.38082	0.0154436	0.0505984	Up
lnc-MSTRG.16397.1	3.99	1.02333	-1.96311	0.0155458	0.0508894	Down
lnc-MSTRG.32389.1	0.783333	0.0233333	-5.06916	0.0159019	0.0520103	Down
lnc-MSTRG.9163.1	6.15	11.8067	0.940943	0.0160526	0.0524015	No
lnc-MSTRG.4015.1	0.496667	0.0133333	-5.21917	0.0160597	0.0524015	Down
lnc-MSTRG.17627.1	0.353333	2.04	2.52947	0.016063	0.0524015	Up
lnc-MSTRG.23230.1	0.0433333	0.483333	3.47947	0.0161858	0.0527569	Up
lnc-MSTRG.20912.1	0.673333	0.001	-9.39518	0.0162138	0.0528027	Down
lnc-MSTRG.10652.1	1.23333	0.396667	-1.63656	0.0162402	0.0528433	Down
lnc-MSTRG.4008.1	0.001	0.94	9.87652	0.016256	0.0528495	Up
lnc-MSTRG.7824.1	0.001	0.606667	9.24476	0.0164211	0.0533404	Up
lnc-MSTRG.16059.2	1.66	0.27	-2.62015	0.0164707	0.0534559	Down
lnc-MSTRG.30295.1	0.72	0.001	-9.49185	0.0166684	0.0540051	Down
lnc-MSTRG.33662.1	0.836667	0.001	-9.70851	0.0166684	0.0540051	Down
lnc-MSTRG.8592.1	0.001	1.22667	10.2605	0.0167365	0.0541763	Up
lnc-MSTRG.31279.1	1.30667	0.143333	-3.18845	0.0167561	0.0541763	Down
lnc-MSTRG.2948.1	0.276667	1.24333	2.16799	0.0167641	0.0541763	Up
lnc-MSTRG.28475.1	2.62333	1.11333	-1.23652	0.0168897	0.0544914	Down
lnc-MSTRG.32061.1	0.913333	0.001	-9.835	0.0168944	0.0544914	Down
lnc-MSTRG.21239.3	2.23667	0.146667	-3.93074	0.0169047	0.0544914	Down
lnc-MSTRG.21891.1	1.83	0.653333	-1.48595	0.0169766	0.0546769	Down
lnc-MSTRG.20574.2	1.04	0.25	-2.05658	0.0170155	0.0547556	Down
lnc-MSTRG.16163.2	1.58	3.16	1	0.0170884	0.0549437	Up
lnc-MSTRG.27838.1	0.34	0.001	-8.40939	0.0171561	0.0550718	Down
lnc-MSTRG.1734.1	0.473333	1.62333	1.77803	0.0171573	0.0550718	Up
lnc-MSTRG.5622.1	0.001	1.14667	10.1632	0.0173116	0.0555202	Up
lnc-MSTRG.1905.2	0.0166667	0.383333	4.52356	0.0174312	0.0558565	Up
lnc-MSTRG.14397.2	0.0566667	1.2	4.40439	0.0174955	0.056014	Up
lnc-MSTRG.16207.1	1.97667	0.823333	-1.26352	0.0175099	0.056014	Down
lnc-MSTRG.10876.2	0.536667	1.78	1.72978	0.0176028	0.0562636	Up
lnc-MSTRG.3653.1	0.001	1.28	10.3219	0.0177684	0.0567453	Up
lnc-MSTRG.23943.1	0.216667	1.40333	2.69531	0.017939	0.057242	Up
lnc-MSTRG.27023.1	8.63	20.3767	1.23949	0.0179981	0.0573823	Up
lnc-MSTRG.26934.2	0.973333	2.26667	1.21957	0.018092	0.0576332	Up
lnc-MSTRG.31620.2	2.2	7.79	1.82412	0.0181504	0.0577514	Up
lnc-MSTRG.14293.1	1.02333	2.58333	1.33596	0.0181596	0.0577514	Up
lnc-MSTRG.2770.1	0.586667	0.0233333	-4.65208	0.018266	0.0580414	Down
lnc-MSTRG.13381.1	0.9	0.27	-1.73697	0.0183861	0.0583741	Down
lnc-MSTRG.18574.1	0.593333	1.99333	1.74827	0.0184206	0.0584345	Up
lnc-MSTRG.32036.1	2.95667	7.28	1.29997	0.0186375	0.0590298	Up
lnc-MSTRG.33994.1	1.28667	0.3	-2.1006	0.0186393	0.0590298	Down
lnc-MSTRG.32019.1	0.04	0.73	4.18982	0.0186972	0.0591296	Up
lnc-MSTRG.20898.2	0.001	0.736667	9.52487	0.018702	0.0591296	Up
lnc-MSTRG.3973.1	0.001	1.04667	10.0316	0.0188893	0.0596719	Up
lnc-MSTRG.4491.1	1.39	0.513333	-1.43712	0.0189214	0.0597237	Down
lnc-MSTRG.28514.1	2.42	0.0666667	-5.1819	0.0189717	0.0598327	Down
lnc-MSTRG.31825.3	1.42667	0.1	-3.83458	0.0190427	0.0599678	Down
lnc-MSTRG.8997.1	1.51667	0.183333	-3.04836	0.0190499	0.0599678	Down
lnc-MSTRG.10362.1	4.50333	1.73333	-1.37744	0.019062	0.0599678	Down
lnc-MSTRG.18109.1	0.001	1.59333	10.6378	0.0191031	0.0600473	Up
lnc-MSTRG.1213.1	0.001	1.49	10.5411	0.0191648	0.0601915	Up
lnc-MSTRG.9417.1	8.73	20.1233	1.20482	0.0192221	0.0603214	Up
lnc-MSTRG.18680.6	0.73	3.74333	2.35836	0.0192407	0.0603301	Up
lnc-MSTRG.20540.3	0.63	1.79333	1.50922	0.0192994	0.0604641	Up
lnc-MSTRG.20329.1	0.803333	0.001	-9.64985	0.0194867	0.0609642	Down
lnc-MSTRG.14239.1	0.136667	3.30333	4.59519	0.0194912	0.0609642	Up
lnc-MSTRG.34359.1	7.36333	2.64	-1.47982	0.0195633	0.0611392	Down
lnc-MSTRG.13547.1	2.25	0.633333	-1.82889	0.0196139	0.0612471	Down
lnc-MSTRG.24719.2	3.36667	12.61	1.90518	0.0196986	0.0614256	Up
lnc-MSTRG.29076.1	0.693333	0.001	-9.43741	0.0197035	0.0614256	Down
lnc-MSTRG.21930.1	0.73	0.0466667	-3.96743	0.0197247	0.0614414	Down
lnc-MSTRG.6584.1	4.17667	1.58	-1.40243	0.019972	0.0621605	Down
lnc-MSTRG.6814.3	0.04	0.66	4.04439	0.0199896	0.0621644	Up
lnc-MSTRG.17514.1	1.25667	0.286667	-2.13216	0.0200578	0.0623254	Down
lnc-MSTRG.27149.2	0.47	0.03	-3.96963	0.0201174	0.0624595	Down
lnc-MSTRG.13743.1	1.74333	0.55	-1.66434	0.0202516	0.0628246	Down
lnc-MSTRG.18128.1	4.84667	1.85333	-1.38687	0.0202811	0.0628649	Down
lnc-MSTRG.7856.1	0.99	0.116667	-3.08504	0.0203528	0.0630355	Down
lnc-MSTRG.23354.1	1.53	0.503333	-1.60395	0.0203984	0.0631252	Down
lnc-MSTRG.31175.1	0.001	0.826667	9.69116	0.0204609	0.0632159	Up
lnc-MSTRG.3597.1	0.001	0.406667	8.6677	0.020461	0.0632159	Up
lnc-MSTRG.12647.1	1.17333	0.0833333	-3.81558	0.0206193	0.063653	Down
lnc-MSTRG.22209.2	0.753333	0.01	-6.23522	0.0206711	0.0637153	Down
lnc-MSTRG.31452.1	0.17	1.39	3.03148	0.020673	0.0637153	Up
lnc-MSTRG.838.3	0.483333	2.6	2.42742	0.0207344	0.0638526	Up
lnc-MSTRG.28840.2	0.31	1.47333	2.24874	0.0207572	0.063871	Up
lnc-MSTRG.13295.1	0.21	2.08	3.30812	0.0207887	0.0639161	Up
lnc-MSTRG.22020.1	0.001	0.56	9.12928	0.0209244	0.0642812	Up
lnc-MSTRG.13231.1	12.8933	5.88667	-1.1311	0.0209607	0.0643405	Down
lnc-MSTRG.18181.1	2.56667	1.27333	-1.01129	0.021025	0.0644858	Down
lnc-MSTRG.9164.1	0.513333	0.001	-9.00375	0.0210744	0.064585	Down
lnc-MSTRG.33853.2	1.74333	0.4	-2.12378	0.0211187	0.0646686	Down
lnc-MSTRG.26287.1	4.53333	1.62667	-1.47865	0.0211693	0.0647713	Down
lnc-MSTRG.12322.1	2.79333	5.98333	1.09896	0.0212501	0.0649659	Up
lnc-MSTRG.3884.1	1.87667	0.12	-3.96707	0.0213188	0.0651235	Down
lnc-MSTRG.7395.1	0.916667	2.70333	1.56027	0.0214002	0.0653196	Up
lnc-MSTRG.14545.1	0.166667	1.21667	2.8679	0.0214465	0.0654085	Up
lnc-MSTRG.17004.1	15.2267	7.67	-0.989302	0.0215333	0.0655752	No
lnc-MSTRG.10821.1	0.77	0.0433333	-4.15131	0.0215419	0.0655752	Down
lnc-MSTRG.22999.1	0.63	0.001	-9.29921	0.0215531	0.0655752	Down
lnc-MSTRG.30155.1	1.16667	0.0766667	-3.92765	0.0215997	0.0656646	Down
lnc-MSTRG.17021.8	1.02667	0.153333	-2.74322	0.0216218	0.0656791	Down
lnc-MSTRG.9165.1	0.766667	0.0566667	-3.75803	0.0216427	0.06569	Down
lnc-MSTRG.18591.1	0.643333	0.03	-4.42253	0.0219724	0.0666281	Down
lnc-MSTRG.2708.1	0.123333	3.89	4.97914	0.0219869	0.0666281	Up
lnc-MSTRG.28153.1	0.001	0.906667	9.82443	0.0221078	0.0669409	Up
lnc-MSTRG.5332.1	0.733333	0.0633333	-3.53343	0.0221332	0.0669645	Down
lnc-MSTRG.266.2	0.516667	0.0466667	-3.46877	0.0222276	0.0671966	Down
lnc-MSTRG.6550.1	0.923333	0.2	-2.20685	0.0223157	0.0673533	Down
lnc-MSTRG.26675.1	0.576667	0.001	-9.17159	0.0223327	0.0673533	Down
lnc-MSTRG.31695.1	0.296667	0.001	-8.2127	0.0223327	0.0673533	Down
lnc-MSTRG.17982.1	20.8367	6.52333	-1.67544	0.0223719	0.0674179	Down
lnc-MSTRG.18857.2	3.22667	8.12333	1.33203	0.0224078	0.0674725	Up
lnc-MSTRG.17497.1	2.88333	0.213333	-3.75656	0.0225163	0.0677453	Down
lnc-MSTRG.29505.1	0.001	1.06	10.0498	0.0227212	0.0683077	Up
lnc-MSTRG.13297.2	0.573333	0.04	-3.8413	0.0229396	0.0689096	Down
lnc-MSTRG.28061.2	0.0666667	0.553333	3.05311	0.0229954	0.0690227	Up
lnc-MSTRG.6091.1	0.12	1	3.05889	0.0231503	0.069417	Up
lnc-MSTRG.15694.1	0.001	0.753333	9.55714	0.0231634	0.069417	Up
lnc-MSTRG.27363.7	1.41	0.193333	-2.86653	0.0231996	0.0694705	Down
lnc-MSTRG.29119.1	0.216667	1.64333	2.92308	0.0232882	0.0696808	Up
lnc-MSTRG.3185.2	2.70667	0.956667	-1.50043	0.0236024	0.0705631	Down
lnc-MSTRG.21907.1	0.723333	0.001	-9.49852	0.0236202	0.0705631	Down
lnc-MSTRG.23098.1	0.001	0.713333	9.47843	0.023764	0.0709369	Up
lnc-MSTRG.11163.2	0.173333	1.16667	2.75077	0.0238354	0.0710939	Up
lnc-MSTRG.30704.1	1.06333	3.73667	1.81316	0.0242071	0.072146	Up
lnc-MSTRG.2900.1	0.1	1.67333	4.06465	0.0242518	0.0722224	Up
lnc-MSTRG.9721.1	1.29	0.253333	-2.34826	0.0244717	0.0728201	Down
lnc-MSTRG.31475.1	0.223333	1.22667	2.45747	0.0246304	0.0732349	Up
lnc-MSTRG.21257.4	6.06	0.44	-3.78374	0.0249081	0.0740025	Down
lnc-MSTRG.29290.1	0.001	0.716667	9.48516	0.025053	0.074358	Up
lnc-MSTRG.30656.2	0.04	1.53	5.25739	0.0250669	0.074358	Up
lnc-MSTRG.17701.1	1.87333	0.813333	-1.20369	0.0251231	0.0744662	Down
lnc-MSTRG.15383.1	0.001	0.72	9.49185	0.0251427	0.0744662	Up
lnc-MSTRG.8453.4	1.11667	0.463333	-1.26908	0.0252796	0.0748136	Down
lnc-MSTRG.26542.1	0.001	0.596667	9.22078	0.0253802	0.0750526	Up
lnc-MSTRG.6215.1	0.001	1.51	10.5603	0.0259264	0.076608	Up
lnc-MSTRG.17917.1	0.001	0.593333	9.2127	0.026228	0.0773861	Up
lnc-MSTRG.23105.1	1.16667	0.3	-1.95936	0.0262305	0.0773861	Down
lnc-MSTRG.3808.1	7.52333	18.63	1.30818	0.0263185	0.0775854	Up
lnc-MSTRG.2569.1	2.21333	0.836667	-1.4035	0.0267514	0.0788003	Down
lnc-MSTRG.17251.5	0.001	0.856667	9.74259	0.0268096	0.0789106	Up
lnc-MSTRG.15121.1	0.663333	0.03	-4.4667	0.0268869	0.0790766	Down
lnc-MSTRG.27687.1	3.92667	1.72333	-1.1881	0.026936	0.0791598	Down
lnc-MSTRG.9034.1	0.09	3.29	5.19202	0.026969	0.0791955	Up
lnc-MSTRG.28010.1	1.08333	0.2	-2.43741	0.0271741	0.0797358	Down
lnc-MSTRG.33661.1	0.26	1.21	2.21842	0.0272045	0.0797634	Up
lnc-MSTRG.33974.1	0.75	0.001	-9.55075	0.0272985	0.0799771	Down
lnc-MSTRG.11113.1	0.001	0.77	9.58871	0.02742	0.0802713	Up
lnc-MSTRG.19525.2	0.001	0.606667	9.24476	0.0274883	0.080409	Up
lnc-MSTRG.22353.1	0.726667	0.001	-9.50515	0.0275306	0.0804707	Down
lnc-MSTRG.34458.1	0.001	0.756667	9.56351	0.0275889	0.0805792	Up
lnc-MSTRG.5987.1	3.92	2.27333	-0.786044	0.0277772	0.0810173	No
lnc-MSTRG.11820.1	27.9133	16.4633	-0.761698	0.027801	0.0810173	No
lnc-MSTRG.6946.4	1.27	4.94	1.95968	0.027803	0.0810173	Up
lnc-MSTRG.28269.1	0.696667	0.0466667	-3.9	0.0281155	0.0818652	Down
lnc-MSTRG.15820.1	0.473333	1.85667	1.97179	0.0282318	0.0821406	Up
lnc-MSTRG.15152.1	1.21333	0.0633333	-4.25987	0.0286917	0.0833631	Down
lnc-MSTRG.24230.5	0.766667	2.59667	1.75999	0.0287281	0.0833631	Up
lnc-MSTRG.5356.1	1.86	0.616667	-1.59274	0.0287451	0.0833631	Down
lnc-MSTRG.23820.4	2.21333	4.27	0.948015	0.0287505	0.0833631	No
lnc-MSTRG.6468.1	0.0333333	0.883333	4.72792	0.0287618	0.0833631	Up
lnc-MSTRG.10806.2	0.62	0.001	-9.27612	0.0290283	0.0840583	Down
lnc-MSTRG.19667.2	0.566667	0.146667	-1.94996	0.029046	0.0840583	Down
lnc-MSTRG.4873.1	2.49333	0.72	-1.79201	0.0291449	0.0842803	Down
lnc-MSTRG.18844.1	0.001	0.8	9.64386	0.0291904	0.0843477	Up
lnc-MSTRG.13245.1	0.09	0.6	2.73697	0.0292605	0.0844858	Up
lnc-MSTRG.26776.1	4.01333	1.08	-1.89377	0.0294713	0.0850298	Down
lnc-MSTRG.3127.1	0.103333	0.733333	2.82716	0.0296387	0.0854479	Up
lnc-MSTRG.28049.2	0.001	0.79	9.62571	0.0298537	0.0860023	Up
lnc-MSTRG.4287.1	0.0233333	0.606667	4.70044	0.0300234	0.0864254	Up
lnc-MSTRG.30590.1	0.943333	0.103333	-3.19046	0.0300801	0.0865232	Down
lnc-MSTRG.18257.1	0.416667	2.14667	2.36513	0.0301888	0.0867699	Up
lnc-MSTRG.12163.2	0.97	0.21	-2.2076	0.0302143	0.0867774	Down
lnc-MSTRG.19833.1	2.42667	1.24333	-0.964763	0.0303331	0.0870527	No
lnc-MSTRG.17743.1	0.873333	0.303333	-1.52563	0.0307845	0.0882815	Down
lnc-MSTRG.15020.1	9.82667	3.75	-1.38981	0.0308182	0.0883115	Down
lnc-MSTRG.3704.1	0.276667	1.54333	2.47983	0.0310091	0.0887263	Up
lnc-MSTRG.30273.1	0.24	1.01667	2.08274	0.0310098	0.0887263	Up
lnc-MSTRG.5774.1	2.09667	0.273333	-2.93936	0.0311622	0.0890953	Down
lnc-MSTRG.16549.1	0.08	0.873333	3.44846	0.0312701	0.0893364	Up
lnc-MSTRG.5937.1	1.70333	6.63	1.96065	0.031303	0.089363	Up
lnc-MSTRG.7121.1	0.256667	1.28	2.31818	0.0316511	0.0902889	Up
lnc-MSTRG.20949.2	0.366667	0.0733333	-2.32193	0.0318239	0.0907135	Down
lnc-MSTRG.1096.7	0.536667	2.23333	2.0571	0.0320098	0.0911751	Up
lnc-MSTRG.13840.1	0.001	0.623333	9.28386	0.032053	0.0912296	Up
lnc-MSTRG.29264.1	1.26	0.253333	-2.31431	0.0321178	0.0913454	Down
lnc-MSTRG.16620.1	0.9	0.0933333	-3.26946	0.0323521	0.0919429	Down
lnc-MSTRG.4158.1	0.763333	2.59333	1.76442	0.0323944	0.0919944	Up
lnc-MSTRG.25956.1	0.92	0.0666667	-3.7866	0.0329569	0.0935216	Down
lnc-MSTRG.32073.1	0.89	0.01	-6.47573	0.0330791	0.0937982	Down
lnc-MSTRG.8917.4	0.256667	2.50333	3.28588	0.0331625	0.0939644	Up
lnc-MSTRG.12462.1	0.833333	0.313333	-1.4112	0.0332756	0.0941257	Down
lnc-MSTRG.1325.1	0.03	1.07	5.1565	0.0332797	0.0941257	Up
lnc-MSTRG.20898.1	0.001	0.62	9.27612	0.0332938	0.0941257	Up
lnc-MSTRG.31122.1	0.366667	0.001	-8.51833	0.0338843	0.0956793	Down
lnc-MSTRG.14541.1	0.001	0.506667	8.98489	0.0338938	0.0956793	Up
lnc-MSTRG.2436.1	1.79667	3.78	1.07306	0.0340407	0.0960227	Up
lnc-MSTRG.33752.1	0.866667	0.0833333	-3.37851	0.0342238	0.0964673	Down
lnc-MSTRG.3451.1	0.15	1.6	3.41504	0.0342743	0.0965049	Up
lnc-MSTRG.33570.1	0.38	1.17667	1.63063	0.0343199	0.0965049	Up
lnc-MSTRG.21274.3	1.46	4.12	1.49668	0.0343384	0.0965049	Up
lnc-MSTRG.12953.1	11.11	23.07	1.05416	0.0343389	0.0965049	Up
lnc-MSTRG.26160.1	0.703333	0.001	-9.45806	0.034646	0.0972959	Down
lnc-MSTRG.22582.1	0.756667	0.001	-9.56351	0.0346923	0.0973539	Down
lnc-MSTRG.11800.1	2.33333	0.656667	-1.82916	0.0347806	0.0974881	Down
lnc-MSTRG.11310.1	0.07	0.89	3.66838	0.0347915	0.0974881	Up
lnc-MSTRG.13488.1	0.346667	2.03667	2.55459	0.0349781	0.0979386	Up
lnc-MSTRG.21339.1	0.43	0.001	-8.74819	0.0351113	0.0982393	Down
lnc-MSTRG.21628.1	0.503333	0.001	-8.97537	0.0353185	0.0986914	Down
lnc-MSTRG.21912.1	1.13667	0.356667	-1.67216	0.035325	0.0986914	Down
lnc-MSTRG.20149.1	3.89667	1.41333	-1.46314	0.0354345	0.0988708	Down
lnc-MSTRG.12436.2	1.29333	3.11667	1.26891	0.0354413	0.0988708	Up
lnc-MSTRG.21756.1	1.25667	0.146667	-3.09899	0.0356833	0.0994729	Down
lnc-MSTRG.1841.1	0.001	0.886667	9.79225	0.0357205	0.0995032	Up
lnc-MSTRG.22378.1	0.273333	1.78	2.70314	0.0359108	0.0999601	Up
lnc-MSTRG.23469.1	1.67667	0.313333	-2.41983	0.035975	0.100065	Down
lnc-MSTRG.6002.1	1.97667	0.293333	-2.75246	0.0360799	0.100284	Down
lnc-MSTRG.28779.1	1.01	0.13	-2.95777	0.0362088	0.100568	Down
lnc-MSTRG.15874.1	5.61333	2.5	-1.16693	0.0363589	0.100911	Down
lnc-MSTRG.29789.1	0.863333	0.166667	-2.37295	0.0364755	0.101161	Down
lnc-MSTRG.25458.1	0.001	0.893333	9.80305	0.0365689	0.101346	Up
lnc-MSTRG.2051.1	1.12	7.50333	2.74403	0.0369839	0.102421	Up
lnc-MSTRG.222.1	0.001	0.946667	9.88671	0.0371704	0.102863	Up
lnc-MSTRG.5713.1	0.0733333	1.42333	4.27866	0.0372338	0.102963	Up
lnc-MSTRG.23913.1	1.21333	0.0366667	-5.04836	0.0372817	0.10302	Down
lnc-MSTRG.19603.1	0.453333	0.001	-8.82443	0.0375534	0.103695	Down
lnc-MSTRG.30452.1	38.6267	6.16667	-2.64703	0.0376666	0.103932	Down
lnc-MSTRG.22819.1	1.62667	5.38333	1.72658	0.0377149	0.10399	Up
lnc-MSTRG.18058.1	4.81333	2.16667	-1.15156	0.0377805	0.104095	Down
lnc-MSTRG.17824.1	2.12667	0.226667	-3.22995	0.0380084	0.104647	Down
lnc-MSTRG.21640.2	0.001	0.636667	9.31439	0.0383423	0.10549	Up
lnc-MSTRG.25668.1	7.21	14.9533	1.0524	0.0384019	0.105577	Up
lnc-MSTRG.30269.1	1.38333	0.0466667	-4.88961	0.0386403	0.106156	Down
lnc-MSTRG.16187.1	0.51	1.83	1.84327	0.0387162	0.106287	Up
lnc-MSTRG.14704.1	0.03	0.376667	3.65025	0.0387724	0.106345	Up
lnc-MSTRG.13591.1	0.001	0.623333	9.28386	0.0387931	0.106345	Up
lnc-MSTRG.24147.1	2.6	0.516667	-2.33121	0.0389085	0.106584	Down
lnc-MSTRG.20998.1	0.15	1.56333	3.38159	0.0389754	0.106621	Up
lnc-MSTRG.32349.1	3.24333	1.85667	-0.804762	0.0389932	0.106621	No
lnc-MSTRG.21384.1	0.02	0.466667	4.54432	0.0390064	0.106621	Up
lnc-MSTRG.6119.1	0.843333	0.001	-9.71996	0.0391982	0.107068	Down
lnc-MSTRG.3049.1	1.10333	0.4	-1.4638	0.0395678	0.107945	Down
lnc-MSTRG.14337.1	0.001	0.963333	9.91189	0.0395762	0.107945	Up
lnc-MSTRG.4689.1	0.001	2.03333	10.9896	0.0398287	0.108556	Up
lnc-MSTRG.19969.1	1.23333	0.666667	-0.887525	0.0401422	0.109332	No
lnc-MSTRG.5020.1	0.756667	2.68667	1.82809	0.0404371	0.110056	Up
lnc-MSTRG.26055.1	0.001	0.773333	9.59495	0.0407344	0.110786	Up
lnc-MSTRG.26399.1	0.0733333	1.78667	4.60666	0.0407788	0.110824	Up
lnc-MSTRG.17784.1	1.54333	0.123333	-3.64542	0.0408067	0.110824	Down
lnc-MSTRG.24103.1	1.89333	0.66	-1.52039	0.0408958	0.110903	Down
lnc-MSTRG.29123.1	0.03	0.646667	4.42999	0.0409074	0.110903	Up
lnc-MSTRG.13359.1	0.833333	0.001	-9.70275	0.0409236	0.110903	Down
lnc-MSTRG.33151.5	0.0633333	0.6	3.24393	0.0409891	0.110956	Up
lnc-MSTRG.10830.1	1.65667	5.68333	1.77845	0.0410016	0.110956	Up
lnc-MSTRG.32702.1	0.0966667	1.2	3.63387	0.0412032	0.111422	Up
lnc-MSTRG.29772.2	5.76	12.1067	1.07166	0.0414491	0.112007	Up
lnc-MSTRG.31494.1	1.19333	0.1	-3.57693	0.0416471	0.112408	Down
lnc-MSTRG.26056.1	0.0566667	0.776667	3.77672	0.0416566	0.112408	Up
lnc-MSTRG.9404.1	3.06	0.636667	-2.26492	0.0419708	0.113175	Down
lnc-MSTRG.17781.1	0.71	3.34	2.23396	0.042174	0.113596	Up
lnc-MSTRG.10211.1	0.0433333	0.733333	4.08092	0.0421868	0.113596	Up
lnc-MSTRG.4936.1	0.6	2.24667	1.90475	0.0424864	0.114322	Up
lnc-MSTRG.14607.1	0.001	0.923333	9.85071	0.0425992	0.11447	Up
lnc-MSTRG.22226.1	0.566667	0.0233333	-4.60204	0.0426021	0.11447	Down
lnc-MSTRG.21037.3	0.3	1.03	1.77961	0.0427111	0.114682	Up
lnc-MSTRG.6033.1	0.893333	0.001	-9.80305	0.0427618	0.114737	Down
lnc-MSTRG.8163.1	1.82	0.293333	-2.63333	0.0430592	0.115454	Down
lnc-MSTRG.20234.1	0.286667	1.78	2.63443	0.0433295	0.116096	Up
lnc-MSTRG.18601.4	3.95333	1.47	-1.42725	0.0434603	0.116364	Down
lnc-MSTRG.29941.1	0.001	1.15	10.1674	0.0436974	0.116841	Up
lnc-MSTRG.24116.1	0.84	0.273333	-1.61973	0.0436998	0.116841	Down
lnc-MSTRG.7751.1	2.34667	0.953333	-1.29956	0.0438149	0.117066	Down
lnc-MSTRG.24031.1	1.03667	0.123333	-3.07132	0.0446607	0.119242	Down
lnc-MSTRG.17122.1	0.106667	0.823333	2.94837	0.0449321	0.119882	Up
lnc-MSTRG.31944.2	0.176667	1.23667	2.80735	0.045013	0.120014	Up
lnc-MSTRG.22433.1	0.58	0.001	-9.17991	0.0454123	0.120993	Down
lnc-MSTRG.4951.1	0.116667	0.001	-6.86625	0.0457496	0.121806	Down
lnc-MSTRG.26250.2	2.60333	1.37333	-0.922678	0.0458282	0.12193	No
lnc-MSTRG.25973.1	3.44667	6.87	0.995108	0.0459015	0.121996	No
lnc-MSTRG.21046.1	0.001	4.89333	12.2566	0.0459174	0.121996	Up
lnc-MSTRG.10157.2	0.001	0.793333	9.63178	0.0459539	0.122008	Up
lnc-MSTRG.7248.2	0.001	1.45	10.5018	0.0461012	0.122313	Up
lnc-MSTRG.32340.1	1.42667	0.726667	-0.973283	0.0466696	0.123735	No
lnc-MSTRG.9729.1	0.563333	0.001	-9.13785	0.0470293	0.124601	Down
lnc-MSTRG.31669.1	0.0833333	0.983333	3.56071	0.0470682	0.124617	Up
lnc-MSTRG.2745.2	0.34	1.44	2.08246	0.0472994	0.125142	Up
lnc-MSTRG.32261.1	0.21	0.001	-7.71425	0.0476305	0.125833	Down
lnc-MSTRG.11659.2	0.893333	0.25	-1.83727	0.0476308	0.125833	Down
lnc-MSTRG.24202.2	0.51	2.1	2.04182	0.0476599	0.125833	Up
lnc-MSTRG.29911.1	0.001	0.72	9.49185	0.0477926	0.126056	Up
lnc-MSTRG.10685.1	0.696667	0.001	-9.44432	0.0478108	0.126056	Down
lnc-MSTRG.29832.1	0.236667	0.8	1.75714	0.0478507	0.126073	Up
lnc-MSTRG.5547.1	0.693333	0.06	-3.53051	0.0481165	0.126686	Down
lnc-MSTRG.28347.3	0.343333	1.52333	2.14955	0.0484119	0.127375	Up
lnc-MSTRG.20150.1	0.696667	0.001	-9.44432	0.0485528	0.127623	Down
lnc-MSTRG.13268.1	0.62	0.001	-9.27612	0.048607	0.127623	Down
lnc-MSTRG.31552.1	0.556667	0.001	-9.12067	0.048607	0.127623	Down
lnc-MSTRG.34504.1	0.91	0.0366667	-4.63333	0.0486909	0.127755	Down
lnc-MSTRG.8047.1	4.15333	1.00667	-2.04468	0.0489669	0.12839	Down
lnc-MSTRG.8727.1	0.001	0.793333	9.63178	0.0490301	0.128467	Up
lnc-MSTRG.21899.2	0.37	0.001	-8.53138	0.0491499	0.128692	Down
lnc-MSTRG.2981.1	0.236667	1.01667	2.10292	0.0495222	0.129577	Up
lnc-MSTRG.22220.2	0.74	1.54333	1.06045	0.0500891	0.13097	Up
lnc-MSTRG.29909.1	0.0533333	1.02	4.25739	0.0505854	0.132177	Up
lnc-MSTRG.163.2	1.55	3.55333	1.1969	0.0506903	0.13236	Up
lnc-MSTRG.23433.4	0.36	0.0133333	-4.75489	0.0507586	0.132447	Down
lnc-MSTRG.3477.1	0.513333	2.76333	2.42844	0.0509968	0.132977	Up
lnc-MSTRG.19484.1	0.276667	0.0366667	-2.91561	0.0510807	0.133105	Down
lnc-MSTRG.28332.1	0.8	0.001	-9.64386	0.0513152	0.133624	Down
lnc-MSTRG.11605.1	0.406667	0.001	-8.6677	0.0519937	0.135205	Down
lnc-MSTRG.3923.1	0.45	0.001	-8.81378	0.0519937	0.135205	Down
lnc-MSTRG.24940.1	0.626667	1.88	1.58496	0.0520698	0.13531	Up
lnc-MSTRG.18813.2	1.82667	0.86	-1.0868	0.0525155	0.136375	Down
lnc-MSTRG.33946.1	0.88	0.0533333	-4.04439	0.0529407	0.137385	Down
lnc-MSTRG.28844.1	2.26333	0.96	-1.23734	0.0533644	0.13839	Down
lnc-MSTRG.15120.1	1.00333	0.14	-2.8413	0.0535073	0.138666	Down
lnc-MSTRG.6153.1	0.346667	0.913333	1.39759	0.0536449	0.138891	Up
lnc-MSTRG.26785.1	0.233333	2.15333	3.20611	0.0536673	0.138891	Up
lnc-MSTRG.19293.1	2.21	0.513333	-2.10608	0.053823	0.139199	Down
lnc-MSTRG.21485.1	0.27	1.29667	2.26378	0.0539364	0.139397	Up
lnc-MSTRG.26015.1	0.67	0.001	-9.38802	0.0540558	0.13961	Down
lnc-MSTRG.13219.1	0.0433333	0.876667	4.33848	0.0542396	0.139967	Up
lnc-MSTRG.14408.1	0.653333	0.001	-9.35168	0.0543046	0.139967	Down
lnc-MSTRG.23326.1	1.06667	0.001	-10.0589	0.0543046	0.139967	Down
lnc-MSTRG.34178.1	0.001	0.446667	8.80305	0.0544704	0.140299	Up
lnc-MSTRG.20012.1	0.001	0.6	9.22882	0.0552541	0.142221	Up
lnc-MSTRG.28103.1	0.001	0.803333	9.64985	0.0555675	0.142931	Up
lnc-MSTRG.19331.1	1.79667	4.66	1.37501	0.0556063	0.142934	Up
lnc-MSTRG.20492.1	0.83	0.001	-9.69697	0.0556572	0.142968	Down
lnc-MSTRG.24667.1	0.623333	0.001	-9.28386	0.0559473	0.143605	Down
lnc-MSTRG.14123.1	0.53	0.001	-9.04985	0.055981	0.143605	Down
lnc-MSTRG.11811.1	0.05	0.556667	3.47681	0.0564668	0.144704	Up
lnc-MSTRG.29966.2	0.413333	0.0266667	-3.9542	0.0564857	0.144704	Down
lnc-MSTRG.16583.1	0.3	1.86	2.63227	0.057457	0.147093	Up
lnc-MSTRG.2996.1	1.14	0.18	-2.66297	0.0575399	0.147206	Down
lnc-MSTRG.26416.1	2.17333	1.12	-0.956411	0.0577263	0.147583	No
lnc-MSTRG.21654.1	58.06	36.0267	-0.688479	0.0578251	0.147736	No
lnc-MSTRG.3805.1	0.213333	3.00667	3.81698	0.0580012	0.148056	Up
lnc-MSTRG.25424.1	0.563333	2.76	2.29261	0.0580282	0.148056	Up
lnc-MSTRG.6754.1	0.001	0.243333	7.92679	0.0581406	0.148243	Up
lnc-MSTRG.23152.1	12.5333	7.36667	-0.766686	0.0583637	0.148618	No
lnc-MSTRG.26475.1	1.61667	0.176667	-3.19392	0.0583662	0.148618	Down
lnc-MSTRG.184.1	1.74667	4.92	1.49405	0.0586005	0.149115	Up
lnc-MSTRG.20112.1	22.2967	13.4833	-0.725651	0.05884	0.149624	No
lnc-MSTRG.10104.1	0.876667	0.103333	-3.08472	0.0594985	0.151197	Down
lnc-MSTRG.29256.1	0.13	1.24333	3.25763	0.0595385	0.151197	Up
lnc-MSTRG.4778.2	0.59	1.39667	1.2432	0.0598086	0.151782	Up
lnc-MSTRG.23829.1	1.07333	0.333333	-1.68706	0.0599886	0.152137	Down
lnc-MSTRG.26548.1	2.23	0.803333	-1.47297	0.0601637	0.152479	Down
lnc-MSTRG.26230.1	0.48	1.25333	1.38466	0.0603774	0.152919	Up
lnc-MSTRG.33673.1	0.616667	0.02	-4.94642	0.0604961	0.153117	Down
lnc-MSTRG.5429.1	0.743333	1.8	1.27592	0.0605763	0.153218	Up
lnc-MSTRG.15601.1	1.59667	0.68	-1.23146	0.0606977	0.153423	Down
lnc-MSTRG.1628.1	0.15	0.83	2.46815	0.0609001	0.153832	Up
lnc-MSTRG.3796.1	0.806667	0.0333333	-4.59694	0.0609465	0.153846	Down
lnc-MSTRG.19919.1	0.001	0.753333	9.55714	0.0611946	0.15437	Up
lnc-MSTRG.3917.1	0.001	1.12333	10.1336	0.0613336	0.154618	Up
lnc-MSTRG.29006.2	0.001	0.733333	9.51833	0.0614026	0.154689	Up
lnc-MSTRG.8996.1	2.77	7.55333	1.44723	0.0615722	0.155013	Up
lnc-MSTRG.17481.1	1.97667	0.206667	-3.25769	0.0618528	0.155616	Down
lnc-MSTRG.15507.1	5.28667	2.95333	-0.840014	0.061918	0.155677	No
lnc-MSTRG.1442.1	0.243333	0.903333	1.89232	0.0621385	0.156128	Up
lnc-MSTRG.20988.1	0.12	1.31333	3.45213	0.0627659	0.1576	Up
lnc-MSTRG.12974.2	2.22	4.74333	1.09534	0.0630145	0.15812	Up
lnc-MSTRG.18701.2	4.74667	11.5567	1.28374	0.0630946	0.158216	Up
lnc-MSTRG.27134.1	0.35	0.001	-8.45121	0.063473	0.159044	Down
lnc-MSTRG.9279.1	0.001	1.04667	10.0316	0.0635086	0.159044	Up
lnc-MSTRG.24391.2	1.61	0.493333	-1.70643	0.0636982	0.159414	Down
lnc-MSTRG.16977.1	0.0833333	0.74	3.15056	0.0637754	0.159502	Up
lnc-MSTRG.21725.3	3.03333	1.34	-1.17867	0.0638519	0.159588	Down
lnc-MSTRG.28363.1	4.41	1.76	-1.3252	0.0639094	0.159626	Down
lnc-MSTRG.8560.1	1.28667	0.28	-2.20014	0.064099	0.159995	Down
lnc-MSTRG.449.2	1.30667	3.36667	1.36543	0.0644574	0.160783	Up
lnc-MSTRG.26319.1	0.65	0.001	-9.3443	0.0650089	0.16199	Down
lnc-MSTRG.4497.1	0.24	0.0166667	-3.848	0.0650266	0.16199	Down
lnc-MSTRG.34174.1	0.713333	0.0766667	-3.21791	0.0653088	0.162586	Down
lnc-MSTRG.18677.1	4.19	2.54333	-0.72023	0.0655572	0.163081	No
lnc-MSTRG.13213.3	0.176667	1.07667	2.60747	0.0655935	0.163081	Up
lnc-MSTRG.24319.1	0.3	0.983333	1.71272	0.0658727	0.163668	Up
lnc-MSTRG.29259.1	1.29333	3.17333	1.2949	0.0659535	0.163761	Up
lnc-MSTRG.2321.1	4.33333	2.49333	-0.797401	0.0660211	0.163822	No
lnc-MSTRG.21421.1	2.28	4.14667	0.862918	0.0662552	0.164295	No
lnc-MSTRG.16009.6	0.553333	2.38333	2.10676	0.0664657	0.16471	Up
lnc-MSTRG.31664.1	0.14	1.29333	3.2076	0.0666298	0.165009	Up
lnc-MSTRG.4768.1	1.32333	2.87667	1.12022	0.0668408	0.165392	Up
lnc-MSTRG.18125.3	0.236667	1.54667	2.70823	0.0668717	0.165392	Up
lnc-MSTRG.29028.3	1.21333	3.26333	1.42737	0.067091	0.165826	Up
lnc-MSTRG.12075.1	0.186667	1.2	2.6845	0.0671599	0.165888	Up
lnc-MSTRG.28579.1	0.156667	1.16667	2.89662	0.067271	0.166055	Up
lnc-MSTRG.14616.1	0.001	1.17667	10.2005	0.0678663	0.167415	Up
lnc-MSTRG.15818.1	0.001	0.85	9.73132	0.0679416	0.167492	Up
lnc-MSTRG.11709.4	0.103333	0.87	3.07371	0.0680347	0.167573	Up
lnc-MSTRG.5060.1	1.05	0.001	-10.0362	0.0680625	0.167573	Down
lnc-MSTRG.1822.1	0.001	0.62	9.27612	0.0683151	0.168085	Up
lnc-MSTRG.27623.1	0.513333	0.001	-9.00375	0.0683834	0.168144	Down
lnc-MSTRG.56.1	1.45	13.92	3.26303	0.0686054	0.168581	Up
lnc-MSTRG.31616.1	0.243333	1.11333	2.19388	0.0686513	0.168584	Up
lnc-MSTRG.31907.1	0.54	0.116667	-2.21057	0.0688626	0.168956	Down
lnc-MSTRG.12150.2	1.03	2.52	1.29078	0.0688916	0.168956	Up
lnc-MSTRG.26239.5	0.56	1.61	1.52356	0.0690093	0.169135	Up
lnc-MSTRG.5529.1	0.923333	0.106667	-3.11374	0.069136	0.169336	Down
lnc-MSTRG.5079.1	1.25	0.363333	-1.78256	0.0692341	0.169467	Down
lnc-MSTRG.26279.1	2.54333	0.483333	-2.39563	0.0693041	0.169529	Down
lnc-MSTRG.28566.4	0.0633333	0.83	3.71207	0.0696077	0.170073	Up
lnc-MSTRG.25923.2	0.001	0.16	7.32193	0.069616	0.170073	Up
lnc-MSTRG.8878.1	0.986667	0.106667	-3.20945	0.069781	0.170366	Down
lnc-MSTRG.12896.1	0.193333	1.62667	3.07276	0.0701675	0.1712	Up
lnc-MSTRG.9527.3	0.001	0.683333	9.41645	0.0707316	0.172465	Up
lnc-MSTRG.26756.1	0.7	0.183333	-1.93289	0.0711322	0.173219	Down
lnc-MSTRG.18395.1	0.001	1.34	10.388	0.0711333	0.173219	Up
lnc-MSTRG.15357.1	0.64	2.27	1.82655	0.0711776	0.173219	Up
lnc-MSTRG.32157.1	2.50667	6.78667	1.43693	0.0712363	0.17325	Up
lnc-MSTRG.4057.1	0.001	0.743333	9.53787	0.0713978	0.173532	Up
lnc-MSTRG.5481.1	0.846667	0.02	-5.40372	0.0715513	0.173794	Down
lnc-MSTRG.26283.1	0.34	0.001	-8.40939	0.0716875	0.174013	Down
lnc-MSTRG.26577.1	1.13667	0.001	-10.1506	0.0720784	0.17485	Down
lnc-MSTRG.22895.1	0.63	0.0633333	-3.31431	0.0722719	0.175208	Down
lnc-MSTRG.17433.1	5.93	3.24	-0.872038	0.0723685	0.17533	No
lnc-MSTRG.25498.1	0.62	0.001	-9.27612	0.0727471	0.176116	Down
lnc-MSTRG.29713.1	0.946667	0.103333	-3.19555	0.072786	0.176116	Down
lnc-MSTRG.4024.2	5.79333	1.86	-1.63909	0.0730431	0.176626	Down
lnc-MSTRG.16832.1	1.26	0.14	-3.16993	0.073145	0.176759	Down
lnc-MSTRG.30285.2	0.0366667	0.63	4.10281	0.0736008	0.177748	Up
lnc-MSTRG.21481.1	2.99667	1.06667	-1.49025	0.0737323	0.177952	Down
lnc-MSTRG.5512.1	0.001	0.59	9.20457	0.0738226	0.178057	Up
lnc-MSTRG.31036.1	0.0133333	0.216667	4.02237	0.074231	0.178928	Up
lnc-MSTRG.2976.1	3.72333	1.77333	-1.07013	0.0746999	0.179944	Down
lnc-MSTRG.16035.1	25.2267	42.4967	0.7524	0.075007	0.180569	No
lnc-MSTRG.11261.1	0.406667	1.02667	1.33605	0.0750876	0.180648	Up
lnc-MSTRG.9368.2	2.70333	4.81	0.831297	0.0751561	0.180649	No
lnc-MSTRG.15602.1	3.03	1.49	-1.02401	0.0751832	0.180649	Down
lnc-MSTRG.19922.2	0.91	0.39	-1.22239	0.0753553	0.180948	Down
lnc-MSTRG.14503.1	0.0366667	1.02333	4.80266	0.0755511	0.181304	Up
lnc-MSTRG.9788.1	0.113333	0.79	2.80128	0.0758462	0.181897	Up
lnc-MSTRG.17302.3	0.316667	1.22667	1.95371	0.0763012	0.182872	Up
lnc-MSTRG.22749.1	0.686667	0.03	-4.51658	0.0765166	0.183273	Down
lnc-MSTRG.33130.1	0.0766667	0.93	3.60056	0.0771025	0.18456	Up
lnc-MSTRG.21895.4	0.0433333	0.643333	3.89202	0.07738	0.185107	Up
lnc-MSTRG.31069.2	12.9433	8.40667	-0.622603	0.0775047	0.185289	No
lnc-MSTRG.12644.1	9.11333	4.91	-0.892256	0.0778365	0.185923	No
lnc-MSTRG.25118.1	0.29	0.001	-8.17991	0.077868	0.185923	Down
lnc-MSTRG.8511.1	0.793333	2.35667	1.57075	0.0779666	0.186041	Up
lnc-MSTRG.5356.3	1.43667	0.543333	-1.40282	0.0781101	0.186192	Down
lnc-MSTRG.11688.2	0.27	1.21	2.16398	0.0781282	0.186192	Up
lnc-MSTRG.8268.1	0.02	0.56	4.80735	0.0782992	0.186483	Up
lnc-MSTRG.21259.1	0.216667	3.65333	4.07566	0.0783709	0.186537	Up
lnc-MSTRG.10179.4	0.21	0.001	-7.71425	0.078546	0.186836	Down
lnc-MSTRG.9355.1	1.76	3.86667	1.13551	0.0786627	0.186997	Up
lnc-MSTRG.22827.1	4.20333	2.28667	-0.878288	0.0788256	0.187266	No
lnc-MSTRG.9288.1	0.946667	0.001	-9.88671	0.0789848	0.187527	Down
lnc-MSTRG.22673.1	0.543333	1.44333	1.4095	0.0791843	0.187883	Up
lnc-MSTRG.12333.1	0.93	0.001	-9.86109	0.0796646	0.188905	Down
lnc-MSTRG.21297.1	0.001	0.94	9.87652	0.0799621	0.189492	Up
lnc-MSTRG.2309.1	0.806667	0.286667	-1.4926	0.0800275	0.189528	Down
lnc-MSTRG.28326.1	0.001	0.506667	8.98489	0.080184	0.189781	Up
lnc-MSTRG.28378.1	0.001	0.59	9.20457	0.0803152	0.189855	Up
lnc-MSTRG.18136.1	0.613333	0.0366667	-4.06413	0.0803156	0.189855	Down
lnc-MSTRG.2699.1	3.66333	1.81333	-1.01451	0.0804286	0.190004	Down
lnc-MSTRG.25392.1	0.67	0.001	-9.38802	0.0808558	0.190894	Down
lnc-MSTRG.19064.1	1.73333	0.46	-1.91384	0.081129	0.19142	Down
lnc-MSTRG.21895.3	1.03	2.09	1.02086	0.0814754	0.192118	Up
lnc-MSTRG.14283.1	0.163333	1.17333	2.84472	0.0816347	0.192374	Up
lnc-MSTRG.10302.1	0.72	0.001	-9.49185	0.0816891	0.192383	Down
lnc-MSTRG.18478.1	0.656667	0.08	-3.03709	0.0821556	0.193261	Down
lnc-MSTRG.8519.1	1.35	0.426667	-1.66178	0.0821641	0.193261	Down
lnc-MSTRG.20098.1	0.47	1.86667	1.98973	0.082404	0.193706	Up
lnc-MSTRG.11275.1	0.57	1.78667	1.64824	0.082506	0.193825	Up
lnc-MSTRG.17646.2	0.0466667	0.42	3.16993	0.0826888	0.194135	Up
lnc-MSTRG.1199.3	0.001	0.87	9.76487	0.0827658	0.194195	Up
lnc-MSTRG.2419.1	0.001	0.556667	9.12067	0.0828377	0.194244	Up
lnc-MSTRG.29983.2	7.27667	3.92333	-0.891198	0.0834218	0.195492	No
lnc-MSTRG.25265.2	0.001	0.74	9.53138	0.0835383	0.195641	Up
lnc-MSTRG.25561.1	0.783333	0.001	-9.61348	0.083599	0.195641	Down
lnc-MSTRG.11091.1	0.001	0.623333	9.28386	0.08364	0.195641	Up
lnc-MSTRG.8253.2	0.09	0.98	3.44478	0.0838143	0.195928	Up
lnc-MSTRG.18269.1	2.26667	5.23667	1.20808	0.0841766	0.196345	Up
lnc-MSTRG.5234.2	0.903333	1.78	0.978547	0.0841868	0.196345	No
lnc-MSTRG.9959.1	1.99667	0.446667	-2.16032	0.0841967	0.196345	Down
lnc-MSTRG.29715.1	0.001	0.666667	9.38082	0.0842383	0.196345	Up
lnc-MSTRG.18097.1	2.63	0.993333	-1.40471	0.0842824	0.196345	Down
lnc-MSTRG.10796.1	1.89	4.26	1.17247	0.0843246	0.196345	Up
lnc-MSTRG.22917.3	0.403333	1.15667	1.51993	0.0843551	0.196345	Up
lnc-MSTRG.24988.3	0.91	0.22	-2.04836	0.0846891	0.197002	Down
lnc-MSTRG.27700.1	0.203333	1.08333	2.41356	0.0851583	0.197972	Up
lnc-MSTRG.16381.1	0.001	0.533333	9.05889	0.0852358	0.198031	Up
lnc-MSTRG.30288.1	0.001	0.593333	9.2127	0.0855783	0.198687	Up
lnc-MSTRG.5656.2	3.96	7.69333	0.958108	0.0856231	0.198687	No
lnc-MSTRG.14574.1	1.00333	2.15667	1.104	0.0857264	0.198806	Up
lnc-MSTRG.6239.1	1.74	1.05333	-0.724125	0.0858692	0.198964	No
lnc-MSTRG.21708.1	0.346667	0.001	-8.43741	0.0858996	0.198964	Down
lnc-MSTRG.24675.1	2.36667	5.77	1.28571	0.0860887	0.19928	Up
lnc-MSTRG.31787.1	7.96	5.22333	-0.607798	0.0865541	0.200235	No
lnc-MSTRG.28522.1	2.21333	1.32667	-0.738415	0.0867543	0.200576	No
lnc-MSTRG.25186.1	0.253333	0.973333	1.9419	0.0869772	0.200969	Up
lnc-MSTRG.1622.1	0.0433333	0.423333	3.28824	0.0870644	0.201048	Up
lnc-MSTRG.14328.1	0.523333	1.47333	1.49328	0.0874023	0.201706	Up
lnc-MSTRG.14168.1	0.66	0.001	-9.36632	0.0875747	0.201783	Down
lnc-MSTRG.34210.1	1.89	4.55	1.26748	0.087593	0.201783	Up
lnc-MSTRG.19096.1	0.05	0.513333	3.3599	0.0875953	0.201783	Up
lnc-MSTRG.3726.2	0.04	0.7	4.12928	0.0877096	0.201924	Up
lnc-MSTRG.31295.1	0.573333	0.04	-3.8413	0.0877742	0.20195	Down
lnc-MSTRG.22329.1	1.89	0.623333	-1.60031	0.0878764	0.202041	Down
lnc-MSTRG.8511.3	0.226667	0.001	-7.82443	0.0879752	0.202041	Down
lnc-MSTRG.420.1	0.766667	0.07	-3.45317	0.0880117	0.202041	Down
lnc-MSTRG.21828.2	1.74	3.62	1.0569	0.0880269	0.202041	Up
lnc-MSTRG.9683.1	0.256667	1.34333	2.38785	0.0882614	0.202396	Up
lnc-MSTRG.6239.2	0.07	0.37	2.4021	0.0883285	0.202396	Up
lnc-MSTRG.12830.3	0.423333	1.6	1.91821	0.0883414	0.202396	Up
lnc-MSTRG.13917.3	0.03	0.476667	3.98995	0.0885386	0.202707	Up
lnc-MSTRG.24676.2	0.001	0.76	9.56986	0.0885839	0.202707	Up
lnc-MSTRG.3300.1	0.06	0.553333	3.20511	0.0886509	0.202738	Up
lnc-MSTRG.32204.1	0.313333	0.883333	1.49526	0.089172	0.203806	Up
lnc-MSTRG.2439.1	1.54667	5.2	1.74935	0.0895048	0.204444	Up
lnc-MSTRG.5144.1	0.626667	0.0533333	-3.55459	0.0896309	0.204609	Down
lnc-MSTRG.24231.1	0.63	3.29667	2.38758	0.0898885	0.205073	Up
lnc-MSTRG.21944.1	9.47	2.83333	-1.74086	0.0899589	0.205111	Down
lnc-MSTRG.9440.1	0.336667	0.04	-3.07325	0.0901447	0.205411	Down
lnc-MSTRG.3067.1	0.29	1.30667	2.17177	0.0902882	0.205614	Up
lnc-MSTRG.10500.1	0.001	0.606667	9.24476	0.0903666	0.205669	Up
lnc-MSTRG.19325.1	0.0533333	0.66	3.62936	0.0911141	0.207237	Up
lnc-MSTRG.24188.1	0.393333	0.04	-3.29768	0.0911647	0.207237	Down
lnc-MSTRG.27360.1	0.03	0.493333	4.03953	0.0918091	0.208577	Up
lnc-MSTRG.11946.1	0.72	0.001	-9.49185	0.0920926	0.208971	Down
lnc-MSTRG.17319.1	0.683333	0.001	-9.41645	0.0920926	0.208971	Down
lnc-MSTRG.6122.1	0.32	0.0533333	-2.58496	0.0932031	0.211331	Down
lnc-MSTRG.9294.1	1.77667	4.85667	1.45079	0.0932441	0.211331	Up
lnc-MSTRG.1905.3	0.001	0.136667	7.09452	0.0933763	0.211504	Up
lnc-MSTRG.29344.2	1.30667	0.21	-2.63743	0.0937809	0.212294	Down
lnc-MSTRG.15594.1	2.05667	1.07667	-0.933736	0.0940748	0.212832	No
lnc-MSTRG.8865.1	0.04	0.466667	3.54432	0.0946256	0.213951	Up
lnc-MSTRG.12590.2	1.56	0.376667	-2.05019	0.0947086	0.213953	Down
lnc-MSTRG.15540.1	0.366667	2.00667	2.45226	0.0947391	0.213953	Up
lnc-MSTRG.21916.1	0.713333	0.001	-9.47843	0.0947993	0.213961	Down
lnc-MSTRG.4778.1	0.473333	1.57333	1.7329	0.0949602	0.21408	Up
lnc-MSTRG.20994.1	0.76	0.0733333	-3.37346	0.0949649	0.21408	Down
lnc-MSTRG.14645.1	0.0766667	0.69	3.16993	0.0952695	0.214622	Up
lnc-MSTRG.31036.2	0.0766667	0.406667	2.40718	0.0953182	0.214622	Up
lnc-MSTRG.18025.1	0.001	1.25	10.2877	0.0954158	0.214714	Up
lnc-MSTRG.34466.1	1.02333	3.2	1.6448	0.0956148	0.215034	Up
lnc-MSTRG.4320.2	0.001	0.386667	8.59495	0.0957827	0.215284	Up
lnc-MSTRG.3063.1	0.001	0.626667	9.29155	0.0958999	0.215411	Up
lnc-MSTRG.9249.1	1.48667	3.1	1.06019	0.0959528	0.215411	Up
lnc-MSTRG.27900.1	0.796667	0.001	-9.63783	0.0961743	0.215781	Down
lnc-MSTRG.7251.1	0.0733333	0.966667	3.72048	0.0963203	0.21586	Up
lnc-MSTRG.24943.1	0.956667	0.24	-1.99498	0.0963233	0.21586	Down
lnc-MSTRG.28087.2	2.72667	1.33333	-1.0321	0.0964657	0.216051	Down
lnc-MSTRG.30689.1	0.97	0.116667	-3.05559	0.0966015	0.216228	Down
lnc-MSTRG.16262.1	0.41	1.49667	1.86806	0.0969125	0.216796	Up
lnc-MSTRG.19008.1	0.546667	0.001	-9.09452	0.0971394	0.217176	Down
lnc-MSTRG.8289.1	0.556667	0.0733333	-2.92427	0.0973377	0.217491	Down
lnc-MSTRG.12634.6	0.0633333	0.37	2.54649	0.0974107	0.217526	Up
lnc-MSTRG.11417.1	0.673333	1.65333	1.29598	0.0975316	0.217667	Up
lnc-MSTRG.24278.1	1.00667	3.69667	1.87664	0.0976729	0.217855	Up
lnc-MSTRG.22858.3	0.46	0.001	-8.84549	0.0978098	0.217903	Down
lnc-MSTRG.7892.1	0.001	0.506667	8.98489	0.0978468	0.217903	Up
lnc-MSTRG.30053.1	0.31	0.02	-3.9542	0.0978668	0.217903	Down
lnc-MSTRG.13106.1	0.0733333	0.566667	2.94996	0.0983852	0.218929	Up
lnc-MSTRG.3186.1	3.06333	7.17333	1.22754	0.0989089	0.219911	Up
lnc-MSTRG.30436.1	1.16	2.78667	1.26442	0.0989425	0.219911	Up
lnc-MSTRG.8615.1	0.001	0.56	9.12928	0.0990733	0.220073	Up
lnc-MSTRG.20360.1	1.00667	0.18	-2.48352	0.0993421	0.220541	Down
lnc-MSTRG.33970.1	0.956667	2.53667	1.40685	0.0994978	0.220757	Up
lnc-MSTRG.26207.1	0.426667	1.59333	1.90087	0.0998453	0.221399	Up
lnc-MSTRG.3409.1	0.001	0.696667	9.44432	0.100172	0.221994	Up
lnc-MSTRG.6862.1	1.3	0.303333	-2.09954	0.100294	0.222135	Down
lnc-MSTRG.7346.4	0.001	0.686667	9.42347	0.100371	0.222174	Up
lnc-MSTRG.28992.1	0.466667	0.001	-8.86625	0.101202	0.223754	Down
lnc-MSTRG.4614.1	0.74	0.001	-9.53138	0.101202	0.223754	Down
lnc-MSTRG.31825.2	2.03667	0.436667	-2.22161	0.101351	0.223951	Down
lnc-MSTRG.21823.1	0.256667	0.001	-8.00375	0.101606	0.224386	Down
lnc-MSTRG.7415.1	2.30667	1.27667	-0.853428	0.101754	0.224582	No
lnc-MSTRG.5710.1	0.0966667	0.923333	3.25576	0.101949	0.224879	Up
lnc-MSTRG.5404.1	0.001	0.413333	8.69116	0.102079	0.225037	Up
lnc-MSTRG.12210.3	0.943333	1.97667	1.06723	0.102185	0.225139	Up
lnc-MSTRG.18783.2	1.08	0.29	-1.89691	0.102408	0.2255	Down
lnc-MSTRG.23865.1	0.333333	1.72	2.36737	0.102693	0.225997	Up
lnc-MSTRG.23223.1	1.47667	0.316667	-2.22131	0.103198	0.226976	Down
lnc-MSTRG.18019.1	0.253333	0.001	-7.98489	0.103314	0.2271	Down
lnc-MSTRG.29282.1	0.001	0.503333	8.97537	0.10369	0.227794	Up
lnc-MSTRG.5543.2	1.09333	2.51333	1.20087	0.103762	0.22782	Up
lnc-MSTRG.27538.2	0.343333	1.66333	2.2764	0.104342	0.228867	Up
lnc-MSTRG.21498.1	0.001	0.636667	9.31439	0.104359	0.228867	Up
lnc-MSTRG.27405.1	0.63	0.001	-9.29921	0.104626	0.229319	Down
lnc-MSTRG.34110.1	0.616667	0.09	-2.77649	0.10473	0.229415	Down
lnc-MSTRG.30272.1	0.0466667	0.73	3.96743	0.105273	0.230472	Up
lnc-MSTRG.30247.1	0.486667	1.88333	1.95228	0.10539	0.230594	Up
lnc-MSTRG.16873.1	0.453333	0.07	-2.69515	0.105542	0.230793	Down
lnc-MSTRG.27099.1	4.55	2.73667	-0.733447	0.106023	0.231711	No
lnc-MSTRG.4909.1	1.12667	2.27667	1.01486	0.106187	0.231936	Up
lnc-MSTRG.9149.1	0.16	0.001	-7.32193	0.106547	0.232589	Down
lnc-MSTRG.7130.1	0.52	0.0666667	-2.96347	0.106936	0.233303	Down
lnc-MSTRG.32831.3	1.22667	2.40667	0.972293	0.107103	0.233534	No
lnc-MSTRG.2950.1	0.116667	2.09333	4.16534	0.10741	0.234068	Up
lnc-MSTRG.24844.1	0.41	1.60667	1.97037	0.107511	0.234154	Up
lnc-MSTRG.5933.1	0.783333	0.0633333	-3.62859	0.108175	0.235466	Down
lnc-MSTRG.24648.1	0.736667	0.17	-2.11548	0.108265	0.235482	Down
lnc-MSTRG.11956.4	0.16	0.001	-7.32193	0.108307	0.235482	Down
lnc-MSTRG.20895.3	0.001	0.403333	8.65583	0.108625	0.236038	Up
lnc-MSTRG.23732.1	0.256667	2.43333	3.24497	0.108711	0.236091	Up
lnc-MSTRG.30656.1	1.28	3.08667	1.26991	0.109321	0.237279	Up
lnc-MSTRG.32793.1	0.363333	0.0366667	-3.30875	0.110824	0.240404	Down
lnc-MSTRG.33668.1	0.106667	0.76	2.83289	0.111086	0.240835	Up
lnc-MSTRG.8181.1	0.766667	0.276667	-1.47045	0.111497	0.241588	Down
lnc-MSTRG.26723.4	0.466667	1.6	1.77761	0.111674	0.241785	Up
lnc-MSTRG.7787.1	0.816667	0.413333	-0.982442	0.111716	0.241785	No
lnc-MSTRG.17216.1	0.216667	1.07	2.30406	0.111852	0.241853	Up
lnc-MSTRG.23159.1	0.706667	0.07	-3.3356	0.111922	0.241853	Down
lnc-MSTRG.29130.1	0.0266667	0.213333	3	0.111938	0.241853	Up
lnc-MSTRG.237.1	0.00666667	0.736667	6.7879	0.11227	0.24241	Up
lnc-MSTRG.32371.2	0.406667	0.983333	1.27383	0.112324	0.24241	Up
lnc-MSTRG.21480.1	0.001	1.40667	10.4581	0.113033	0.243802	Up
lnc-MSTRG.12361.1	0.413333	1.21667	1.55756	0.113184	0.24399	Up
lnc-MSTRG.17506.1	0.18	0.736667	2.03302	0.114016	0.245535	Up
lnc-MSTRG.31612.1	0.001	1.09333	10.0945	0.114031	0.245535	Up
lnc-MSTRG.25265.3	0.001	0.566667	9.14636	0.114337	0.24602	Up
lnc-MSTRG.19911.3	0.746667	2.31	1.62936	0.114385	0.24602	Up
lnc-MSTRG.24337.2	5.39333	3.16333	-0.769732	0.114558	0.246252	No
lnc-MSTRG.6181.2	0.383333	1.68667	2.1375	0.114712	0.246409	Up
lnc-MSTRG.6164.1	0.16	0.986667	2.62449	0.114761	0.246409	Up
lnc-MSTRG.15247.1	0.001	0.96	9.90689	0.115461	0.247771	Up
lnc-MSTRG.32042.1	0.306667	0.001	-8.26053	0.115717	0.24818	Down
lnc-MSTRG.7058.3	18.3767	12.4667	-0.559799	0.116286	0.24907	No
lnc-MSTRG.12412.1	0.536667	0.001	-9.06788	0.116329	0.24907	Down
lnc-MSTRG.12799.1	0.643333	0.001	-9.32942	0.116329	0.24907	Down
lnc-MSTRG.3126.1	0.001	0.836667	9.70851	0.116668	0.249655	Up
lnc-MSTRG.18414.1	0.943333	0.323333	-1.54475	0.116847	0.249896	Down
lnc-MSTRG.18750.1	2.67333	1	-1.41864	0.117533	0.251223	Down
lnc-MSTRG.21483.1	5.94333	3.58333	-0.72997	0.117869	0.251578	No
lnc-MSTRG.3817.1	0.636667	2.09667	1.71949	0.117882	0.251578	Up
lnc-MSTRG.28671.2	1.82667	5.29333	1.53496	0.117898	0.251578	Up
lnc-MSTRG.24668.1	0.893333	0.03	-4.89616	0.118005	0.251664	Down
lnc-MSTRG.4665.1	0.463333	0.11	-2.07455	0.118082	0.251688	Down
lnc-MSTRG.32180.1	0.433333	1.81667	2.06774	0.118448	0.252326	Up
lnc-MSTRG.33123.1	0.173333	0.766667	2.14505	0.118681	0.252601	Up
lnc-MSTRG.25550.1	0.433333	0.05	-3.11548	0.118711	0.252601	Down
lnc-MSTRG.9749.1	0.69	0.136667	-2.33593	0.118929	0.252923	Down
lnc-MSTRG.30088.1	0.533333	0.0566667	-3.23447	0.120011	0.255083	Down
lnc-MSTRG.18672.1	13.77	7.49333	-0.877849	0.120168	0.255272	No
lnc-MSTRG.31157.3	1.00333	0.236667	-2.08387	0.120949	0.256789	Down
lnc-MSTRG.21577.1	1.77333	4.87	1.45746	0.121505	0.257825	Up
lnc-MSTRG.11163.3	0.1	0.773333	2.95109	0.122223	0.259202	Up
lnc-MSTRG.17347.1	0.586667	0.001	-9.1964	0.123127	0.260974	Down
lnc-MSTRG.24959.4	0.36	1.83333	2.3484	0.123415	0.261438	Up
lnc-MSTRG.21446.1	0.001	0.79	9.62571	0.123993	0.262517	Up
lnc-MSTRG.23589.1	0.976667	0.0333333	-4.87283	0.124209	0.262827	Down
lnc-MSTRG.21828.1	6.67	3.74	-0.834648	0.124399	0.263083	No
lnc-MSTRG.31050.1	0.001	0.55	9.10329	0.124526	0.263127	Up
lnc-MSTRG.13503.2	0.706667	0.293333	-1.26849	0.124559	0.263127	Down
lnc-MSTRG.807.1	0.526667	0.0266667	-4.30378	0.124675	0.263226	Down
lnc-MSTRG.5697.1	1.10333	0.556667	-0.986983	0.124875	0.263501	No
lnc-MSTRG.16336.1	1.09667	0.23	-2.25342	0.12548	0.26463	Down
lnc-MSTRG.26251.1	1.12	0.213333	-2.39232	0.12572	0.264991	Down
lnc-MSTRG.32046.1	0.133333	0.74	2.47249	0.126319	0.266105	Up
lnc-MSTRG.23138.1	0.001	0.723333	9.49852	0.126565	0.266474	Up
lnc-MSTRG.333.1	0.653333	0.001	-9.35168	0.126898	0.266819	Down
lnc-MSTRG.30730.2	0.09	0.393333	2.12776	0.126901	0.266819	Up
lnc-MSTRG.22078.1	0.61	0.156667	-1.96111	0.126994	0.266819	Down
lnc-MSTRG.5383.1	0.723333	0.0933333	-2.9542	0.12701	0.266819	Down
lnc-MSTRG.16992.2	2.71333	1.14333	-1.24682	0.128392	0.269573	Down
lnc-MSTRG.28258.1	0.846667	0.196667	-2.10604	0.128602	0.26975	Down
lnc-MSTRG.22087.1	0.183333	0.936667	2.35307	0.128618	0.26975	Up
lnc-MSTRG.32833.1	0.743333	0.216667	-1.77853	0.128975	0.270222	Down
lnc-MSTRG.13547.2	1.56333	2.70333	0.790114	0.128986	0.270222	No
lnc-MSTRG.33512.1	0.343333	0.07	-2.29418	0.129234	0.270593	Down
lnc-MSTRG.7841.1	0.66	0.0333333	-4.30743	0.12931	0.270603	Down
lnc-MSTRG.11011.1	0.44	0.953333	1.11548	0.129808	0.271274	Up
lnc-MSTRG.25567.1	0.716667	0.07	-3.35588	0.129843	0.271274	Down
lnc-MSTRG.3358.1	0.543333	1.35667	1.32016	0.129912	0.271274	Up
lnc-MSTRG.810.1	0.573333	0.09	-2.67138	0.129917	0.271274	Down
lnc-MSTRG.9900.1	1.35667	2.67667	0.980371	0.130014	0.271328	No
lnc-MSTRG.27313.1	1.4	2.52333	0.849904	0.130129	0.271418	No
lnc-MSTRG.34257.1	7.98	5.5	-0.536957	0.130538	0.271884	No
lnc-MSTRG.13184.2	0.483333	0.001	-8.91687	0.130583	0.271884	Down
lnc-MSTRG.32065.1	1.27	0.656667	-0.951595	0.130633	0.271884	No
lnc-MSTRG.17280.1	5.22333	1.68667	-1.6308	0.130642	0.271884	Down
lnc-MSTRG.10366.1	1.51667	3.20667	1.08017	0.130787	0.271884	Up
lnc-MSTRG.22992.1	0.996667	1.93	0.953418	0.130822	0.271884	No
lnc-MSTRG.21802.1	0.103333	0.606667	2.5536	0.130854	0.271884	Up
lnc-MSTRG.3449.1	0.0933333	0.543333	2.54137	0.131178	0.272407	Up
lnc-MSTRG.19698.3	0.86	0.001	-9.74819	0.131888	0.273602	Down
lnc-MSTRG.16008.1	0.543333	0.03	-4.1788	0.131897	0.273602	Down
lnc-MSTRG.4307.1	0.001	0.753333	9.55714	0.132092	0.273857	Up
lnc-MSTRG.19141.1	1.29	3.12333	1.27572	0.132322	0.274183	Up
lnc-MSTRG.28412.1	0.256667	1.17333	2.19265	0.133771	0.277035	Up
lnc-MSTRG.33839.2	0.263333	0.936667	1.83065	0.134759	0.278929	Up
lnc-MSTRG.21368.1	0.493333	1.86	1.91467	0.135274	0.279842	Up
lnc-MSTRG.9741.2	4.12	0.0966667	-5.41348	0.135748	0.28067	Down
lnc-MSTRG.7141.5	0.001	0.193333	7.59495	0.135913	0.280858	Up
lnc-MSTRG.30499.1	0.97	0.136667	-2.82732	0.136636	0.282197	Down
lnc-MSTRG.4821.1	1.03667	2.38667	1.20305	0.137081	0.282964	Up
lnc-MSTRG.9281.1	0.0466667	0.593333	3.66838	0.137255	0.283167	Up
lnc-MSTRG.31738.1	0.001	0.52	9.02237	0.13935	0.287277	Up
lnc-MSTRG.22722.1	2.04667	1.05333	-0.958314	0.139398	0.287277	No
lnc-MSTRG.13825.1	1.03	0.26	-1.98606	0.139673	0.287688	Down
lnc-MSTRG.32790.1	0.476667	1.96667	2.0447	0.140518	0.289185	Up
lnc-MSTRG.6482.1	0.586667	1.59667	1.44445	0.140629	0.289185	Up
lnc-MSTRG.26204.1	2.01	3.59	0.836788	0.140629	0.289185	No
lnc-MSTRG.13227.1	0.526667	0.001	-9.04075	0.140825	0.289274	Down
lnc-MSTRG.5198.1	0.196667	0.001	-7.61961	0.140825	0.289274	Down
lnc-MSTRG.10076.1	2.66	6.33	1.25078	0.141084	0.28965	Up
lnc-MSTRG.8729.1	0.463333	0.183333	-1.33758	0.141216	0.289764	Down
lnc-MSTRG.7235.2	1.09	0.463333	-1.23421	0.141933	0.291077	Down
lnc-MSTRG.31105.1	0.546667	2.06	1.91391	0.142128	0.291321	Up
lnc-MSTRG.18921.1	0.483333	0.0266667	-4.17991	0.142478	0.291879	Down
lnc-MSTRG.9171.1	0.496667	0.001	-8.95613	0.142714	0.292206	Down
lnc-MSTRG.34593.1	47.36	76.3733	0.6894	0.142949	0.292529	No
lnc-MSTRG.28888.2	2.46333	5.9	1.2601	0.143033	0.292543	Up
lnc-MSTRG.33576.3	1.67333	3.37333	1.01145	0.143751	0.293852	Up
lnc-MSTRG.7485.3	0.546667	2.28333	2.06241	0.144179	0.294569	Up
lnc-MSTRG.9548.1	0.001	0.593333	9.2127	0.144494	0.295054	Up
lnc-MSTRG.29186.3	0.786667	1.55667	0.984636	0.144819	0.295559	No
lnc-MSTRG.2000.1	0.256667	1.13667	2.14684	0.146033	0.297876	Up
lnc-MSTRG.26578.1	2.95	5.11	0.792608	0.146233	0.298124	No
lnc-MSTRG.18108.2	0.126667	0.853333	2.75207	0.146864	0.299248	Up
lnc-MSTRG.24704.1	1.07333	0.42	-1.35364	0.147292	0.299814	Down
lnc-MSTRG.25780.1	0.266667	0.84	1.65535	0.147465	0.299814	Up
lnc-MSTRG.30204.1	0.001	0.576667	9.17159	0.147497	0.299814	Up
lnc-MSTRG.7818.2	0.796667	0.263333	-1.59709	0.147527	0.299814	Down
lnc-MSTRG.33111.1	0.0666667	0.353333	2.40599	0.147536	0.299814	Up
lnc-MSTRG.16662.1	0.306667	0.001	-8.26053	0.147716	0.299858	Down
lnc-MSTRG.29399.1	0.23	0.001	-7.84549	0.147716	0.299858	Down
lnc-MSTRG.34507.1	0.27	0.001	-8.07682	0.148291	0.300864	Down
lnc-MSTRG.10419.1	0.606667	0.001	-9.24476	0.149122	0.302228	Down
lnc-MSTRG.8760.1	0.796667	0.001	-9.63783	0.149122	0.302228	Down
lnc-MSTRG.24911.2	0.38	0.966667	1.34702	0.149789	0.303416	Up
lnc-MSTRG.9300.1	1.06	0.576667	-0.878255	0.149965	0.303612	No
lnc-MSTRG.22146.1	0.496667	0.001	-8.95613	0.150048	0.303618	Down
lnc-MSTRG.27548.1	0.001	0.5	8.96578	0.150307	0.303979	Up
lnc-MSTRG.30285.3	0.0666667	0.63	3.24031	0.150413	0.304032	Up
lnc-MSTRG.23026.1	0.5	0.001	-8.96578	0.150623	0.304293	Down
lnc-MSTRG.6499.1	0.933333	0.346667	-1.42884	0.150805	0.304498	Down
lnc-MSTRG.28373.1	13.64	8.13	-0.746516	0.150946	0.304622	No
lnc-MSTRG.11335.1	2.18333	0.576667	-1.92072	0.151346	0.305266	Down
lnc-MSTRG.8487.1	0.0333333	0.343333	3.36457	0.151465	0.305345	Up
lnc-MSTRG.33966.1	0.0366667	0.29	2.98351	0.151587	0.305428	Up
lnc-MSTRG.10532.1	1.03667	0.476667	-1.1209	0.151999	0.306096	Down
lnc-MSTRG.21613.1	0.523333	0.17	-1.6222	0.15236	0.306661	Down
lnc-MSTRG.24748.1	0.296667	1.53667	2.37289	0.15283	0.307443	Up
lnc-MSTRG.29280.1	0.33	1.31333	1.9927	0.153022	0.307534	Up
lnc-MSTRG.28535.1	9.32667	5.81333	-0.681996	0.153037	0.307534	No
lnc-MSTRG.31089.1	0.103333	0.773333	2.90378	0.153196	0.30769	Up
lnc-MSTRG.5350.1	1.44	0.27	-2.41504	0.15343	0.307997	Down
lnc-MSTRG.27796.3	0.99	0.343333	-1.52782	0.153807	0.308589	Down
lnc-MSTRG.18153.2	0.506667	0.166667	-1.60407	0.15396	0.308734	Down
lnc-MSTRG.18248.2	0.573333	1.33667	1.22119	0.154106	0.308863	Up
lnc-MSTRG.21517.1	0.24	0.001	-7.90689	0.154422	0.309333	Down
lnc-MSTRG.29747.2	3.28333	1.97333	-0.734527	0.154641	0.309609	No
lnc-MSTRG.32007.1	0.403333	0.001	-8.65583	0.155276	0.310717	Down
lnc-MSTRG.22896.1	2.07667	1.07	-0.956659	0.155611	0.311221	No
lnc-MSTRG.32752.1	0.576667	0.206667	-1.48043	0.156342	0.312519	Down
lnc-MSTRG.315.1	0.273333	1	1.87127	0.156604	0.312879	Up
lnc-MSTRG.11473.1	0.28	1.20667	2.10753	0.157004	0.313512	Up
lnc-MSTRG.24391.1	0.84	0.456667	-0.879248	0.15723	0.313798	No
lnc-MSTRG.29710.16	2.53	4.27333	0.756224	0.15751	0.314003	No
lnc-MSTRG.34146.1	1.41667	2.51667	0.829014	0.157517	0.314003	No
lnc-MSTRG.16221.2	0.953333	0.303333	-1.65208	0.157581	0.314003	Down
lnc-MSTRG.10938.1	0.0666667	0.69	3.37156	0.15797	0.314613	Up
lnc-MSTRG.2664.2	1.71667	0.79	-1.11969	0.158336	0.315177	Down
lnc-MSTRG.33425.2	0.466667	1.44	1.6256	0.158442	0.31519	Up
lnc-MSTRG.31733.1	0.533333	0.296667	-0.846195	0.158509	0.31519	No
lnc-MSTRG.1867.2	0.41	1.03667	1.33826	0.158876	0.315755	Up
lnc-MSTRG.21016.1	0.0566667	0.61	3.42824	0.15978	0.317384	Up
lnc-MSTRG.18916.2	1.10667	0.64	-0.790077	0.16004	0.317735	No
lnc-MSTRG.28230.1	0.116667	0.001	-6.86625	0.160273	0.31803	Down
lnc-MSTRG.458.1	0.156667	0.746667	2.25277	0.160405	0.318128	Up
lnc-MSTRG.24492.1	1.91333	0.563333	-1.76403	0.161021	0.319182	Down
lnc-MSTRG.30976.1	0.683333	0.001	-9.41645	0.161332	0.319527	Down
lnc-MSTRG.33861.2	1.05667	0.686667	-0.621839	0.161364	0.319527	No
lnc-MSTRG.19220.1	0.16	0.0133333	-3.58496	0.161606	0.319841	Down
lnc-MSTRG.24552.1	0.35	1.83333	2.38904	0.161719	0.319896	Up
lnc-MSTRG.5061.1	1.39333	0.126667	-3.45943	0.161951	0.320188	Down
lnc-MSTRG.12734.1	0.001	0.763333	9.57617	0.162066	0.320249	Up
lnc-MSTRG.3767.1	0.663333	0.001	-9.37359	0.16301	0.321947	Down
lnc-MSTRG.21660.1	1.03	0.001	-10.0084	0.163788	0.323315	Down
lnc-MSTRG.21630.1	0.676667	0.08	-3.08037	0.164352	0.323934	Down
lnc-MSTRG.26311.1	0.89	1.99333	1.16331	0.164372	0.323934	Up
lnc-MSTRG.13976.1	0.546667	0.001	-9.09452	0.164443	0.323934	Down
lnc-MSTRG.15377.1	0.72	0.001	-9.49185	0.164443	0.323934	Down
lnc-MSTRG.10332.1	0.18	0.001	-7.49185	0.164618	0.32411	Down
lnc-MSTRG.18805.1	2.60333	6.64667	1.35227	0.164736	0.324175	Up
lnc-MSTRG.31355.1	0.38	0.0766667	-2.30933	0.166099	0.326688	Down
lnc-MSTRG.30376.1	1.07333	2.51667	1.22942	0.166503	0.327223	Up
lnc-MSTRG.8119.1	1.31333	0.436667	-1.58863	0.166544	0.327223	Down
lnc-MSTRG.16783.1	0.813333	0.13	-2.64534	0.166801	0.327558	Down
lnc-MSTRG.33945.1	0.693333	0.123333	-2.49099	0.167479	0.32872	Down
lnc-MSTRG.21956.1	12.3767	6.44333	-0.941744	0.16803	0.329632	No
lnc-MSTRG.7758.1	0.0266667	0.283333	3.40939	0.168143	0.329682	Up
lnc-MSTRG.8511.2	0.323333	1.25333	1.95468	0.168349	0.329915	Up
lnc-MSTRG.22163.1	0.123333	0.88	2.83494	0.168795	0.330618	Up
lnc-MSTRG.23998.1	13.47	23.03	0.773765	0.168934	0.33072	No
lnc-MSTRG.33631.1	0.223333	0.69	1.6274	0.16935	0.331364	Up
lnc-MSTRG.18206.1	1.99	0.1	-4.3147	0.16961	0.331702	Down
lnc-MSTRG.11073.1	0.526667	0.001	-9.04075	0.169991	0.332275	Down
lnc-MSTRG.20351.2	0.29	0.833333	1.52284	0.170417	0.332935	Up
lnc-MSTRG.972.1	0.936667	0.11	-3.09003	0.170574	0.333071	Down
lnc-MSTRG.2107.1	1.65667	0.35	-2.24286	0.171652	0.335004	Down
lnc-MSTRG.11205.1	0.04	0.713333	4.1565	0.171987	0.335399	Up
lnc-MSTRG.17733.1	2.61333	1.93667	-0.432315	0.172031	0.335399	No
lnc-MSTRG.21876.1	0.0333333	0.433333	3.70044	0.172347	0.335842	Up
lnc-MSTRG.23104.1	1.63	1.06	-0.620808	0.173406	0.337716	No
lnc-MSTRG.5948.1	0.113333	0.473333	2.06228	0.173487	0.337716	Up
lnc-MSTRG.30807.1	0.001	0.6	9.22882	0.173868	0.338284	Up
lnc-MSTRG.4799.1	0.98	3.07	1.64739	0.174085	0.338533	Up
lnc-MSTRG.394.1	0.126667	0.623333	2.29897	0.174514	0.339069	Up
lnc-MSTRG.3333.1	0.0466667	0.366667	2.974	0.174539	0.339069	Up
lnc-MSTRG.29429.1	0.0366667	0.933333	4.66985	0.175282	0.340337	Up
lnc-MSTRG.23483.2	0.39	0.0766667	-2.3468	0.175685	0.340946	Down
lnc-MSTRG.33167.1	0.533333	1.82333	1.77347	0.176169	0.341711	Up
lnc-MSTRG.20841.1	1.69667	2.69	0.664903	0.177529	0.34401	No
lnc-MSTRG.10845.1	1.49667	3.13	1.06441	0.17758	0.34401	Up
lnc-MSTRG.34578.1	0.71	1.56333	1.13873	0.177693	0.34401	Up
lnc-MSTRG.24683.1	1.97	0.646667	-1.6071	0.177717	0.34401	Down
lnc-MSTRG.20086.1	0.646667	0.001	-9.33688	0.178415	0.344656	Down
lnc-MSTRG.21176.1	0.626667	0.001	-9.29155	0.178415	0.344656	Down
lnc-MSTRG.25218.1	0.653333	0.001	-9.35168	0.178415	0.344656	Down
lnc-MSTRG.29888.1	0.593333	0.001	-9.2127	0.178415	0.344656	Down
lnc-MSTRG.26239.4	0.84	1.59333	0.923587	0.179186	0.345967	No
lnc-MSTRG.14124.2	0.693333	0.12	-2.53051	0.179276	0.345967	Down
lnc-MSTRG.6181.1	0.826667	1.81667	1.13592	0.179449	0.346125	Up
lnc-MSTRG.25968.1	0.813333	0.406667	-1	0.17954	0.346125	No
lnc-MSTRG.1719.3	1.68333	4.64667	1.46488	0.180316	0.347273	Up
lnc-MSTRG.1507.1	0.8	2.19667	1.45724	0.180323	0.347273	Up
lnc-MSTRG.14644.2	0.716667	0.31	-1.20903	0.18041	0.347273	Down
lnc-MSTRG.19984.1	0.356667	1.22333	1.77817	0.180526	0.347321	Up
lnc-MSTRG.5109.1	0.446667	1.02667	1.2007	0.181411	0.348847	Up
lnc-MSTRG.10247.1	3.20667	6.02333	0.909488	0.181572	0.348919	No
lnc-MSTRG.34419.1	0.176667	1.92333	3.44451	0.181685	0.348919	Up
lnc-MSTRG.29958.1	0.72	2.33	1.69426	0.181725	0.348919	Up
lnc-MSTRG.29380.1	0.606667	0.001	-9.24476	0.182438	0.350111	Down
lnc-MSTRG.6871.1	2.68333	1.72667	-0.636037	0.182848	0.350557	No
lnc-MSTRG.13789.1	0.783333	0.001	-9.61348	0.182855	0.350557	Down
lnc-MSTRG.21476.1	1.41	3.37333	1.25848	0.18303	0.350716	Up
lnc-MSTRG.3688.3	1.15667	0.553333	-1.06375	0.183313	0.351081	Down
lnc-MSTRG.23046.1	0.566667	1.88333	1.73272	0.183493	0.351216	Up
lnc-MSTRG.10331.2	0.226667	1.68	2.88982	0.183608	0.351216	Up
lnc-MSTRG.12210.1	0.2	1.16	2.53605	0.183662	0.351216	Up
lnc-MSTRG.24275.6	0.001	0.643333	9.32942	0.184313	0.352283	Up
lnc-MSTRG.28052.1	0.001	0.106667	6.73697	0.184866	0.353164	Up
lnc-MSTRG.25788.1	0.001	0.23	7.84549	0.185025	0.35329	Up
lnc-MSTRG.25819.1	0.25	0.8	1.67807	0.185238	0.353517	Up
lnc-MSTRG.17866.1	0.41	0.87	1.08539	0.185627	0.354083	Up
lnc-MSTRG.29395.1	0.45	0.02	-4.49185	0.18634	0.355264	Down
lnc-MSTRG.9477.1	0.19	0.896667	2.23857	0.186651	0.355677	Up
lnc-MSTRG.6392.1	0.423333	1.55667	1.87859	0.187252	0.356625	Up
lnc-MSTRG.19142.1	1.23	2.77	1.17123	0.187336	0.356625	Up
lnc-MSTRG.9538.2	0.296667	0.0733333	-2.0163	0.187617	0.356939	Down
lnc-MSTRG.8519.3	0.001	0.513333	9.00375	0.18769	0.356939	Up
lnc-MSTRG.12589.1	0.001	0.743333	9.53787	0.187804	0.356979	Up
lnc-MSTRG.23236.1	0.153333	0.756667	2.30299	0.188308	0.357756	Up
lnc-MSTRG.12210.2	1.26	2.73667	1.119	0.188705	0.358169	Up
[truncated: 1,957 more rows]

## Sheet: Table S4
Differentially expressed mRNAs in McIII vs McI
LncRNAid	McaII_mean	McaIII_mean	log2(FC)	PValue	FDR	significant
lnc-MSTRG.10939.1	0.183333	21.3833	6.86587	4.73848e-41	1.79162e-37	Up
lnc-MSTRG.15963.1	75.06	2.74333	-4.77404	6.75724e-39	1.27746e-35	Down
lnc-MSTRG.9681.2	0.59	59.9333	6.6665	1.30408e-38	1.64358e-35	Up
lnc-MSTRG.15692.1	1.07667	121.03	6.81265	9.3949e-33	8.88053e-30	Up
lnc-MSTRG.24692.3	27.8467	2.05667	-3.75912	4.04118e-29	3.02551e-26	Down
lnc-MSTRG.31658.1	51.29	0.873333	-5.876	4.80113e-29	3.02551e-26	Down
lnc-MSTRG.21529.3	8.45333	0.426667	-4.30834	2.02215e-28	1.09225e-25	Down
lnc-MSTRG.26151.1	5.81667	0.11	-5.72462	4.36725e-27	2.06407e-24	Down
lnc-MSTRG.19077.3	0.266667	5.76	4.43296	3.41746e-24	1.43571e-21	Up
lnc-MSTRG.15268.2	1.81	41.3233	4.5129	1.58028e-23	5.97505e-21	Up
lnc-MSTRG.4951.2	11.2333	0.596667	-4.23472	2.31203e-21	7.94708e-19	Down
lnc-MSTRG.5459.1	6.91333	0.423333	-4.02952	1.97282e-20	6.21602e-18	Down
lnc-MSTRG.16112.1	0.0933333	7.39667	6.30834	7.50802e-20	2.18368e-17	Up
lnc-MSTRG.31244.1	0.193333	5.80333	4.90772	2.89798e-19	7.82662e-17	Up
lnc-MSTRG.19189.1	37.6567	0.756667	-5.6371	3.11601e-19	7.85443e-17	Down
lnc-MSTRG.29274.1	4.71333	0.156667	-4.91098	1.39936e-18	3.30686e-16	Down
lnc-MSTRG.22429.1	0.163333	103.667	9.30992	2.80824e-18	6.24586e-16	Up
lnc-MSTRG.298.1	35.3833	0.001	-15.1108	1.08033e-17	2.26929e-15	Down
lnc-MSTRG.11126.1	0.22	10.0867	5.5188	2.16674e-17	4.31182e-15	Up
lnc-MSTRG.20412.1	2.52667	20.52	3.02172	2.8082e-17	5.30891e-15	Up
lnc-MSTRG.5013.1	0.0433333	9.13	7.71899	4.48714e-17	8.07899e-15	Up
lnc-MSTRG.14236.1	0.59	18.2767	4.95314	6.78365e-17	1.16586e-14	Up
lnc-MSTRG.22072.2	54.1867	3.09333	-4.1307	1.13656e-16	1.86841e-14	Down
lnc-MSTRG.5908.1	12.7633	0.0466667	-8.0954	2.52271e-16	3.97431e-14	Down
lnc-MSTRG.33659.1	5.63	0.16	-5.13699	2.63735e-16	3.98872e-14	Down
lnc-MSTRG.8689.1	5.81333	0.116667	-5.6389	3.06738e-16	4.46068e-14	Down
lnc-MSTRG.8235.1	0.001	10.35	13.3373	5.11566e-16	7.16382e-14	Up
lnc-MSTRG.32422.1	0.001	28.42	14.7946	5.66798e-16	7.65379e-14	Up
lnc-MSTRG.19223.2	133.527	4.50667	-4.88892	7.35887e-16	9.59445e-14	Down
lnc-MSTRG.21384.1	18.4533	0.466667	-5.30535	1.08262e-15	1.36446e-13	Down
lnc-MSTRG.9353.2	15.35	0.001	-13.906	1.17854e-15	1.43744e-13	Down
lnc-MSTRG.30526.3	0.001	12.7233	13.6352	1.37025e-15	1.61904e-13	Up
lnc-MSTRG.3787.2	0.51	6.61	3.69608	1.75089e-15	2.00609e-13	Up
lnc-MSTRG.31346.1	13.7433	0.001	-13.7464	2.10527e-15	2.34118e-13	Down
lnc-MSTRG.34519.1	0.443333	24.9567	5.81489	3.29789e-15	3.56267e-13	Up
lnc-MSTRG.20546.1	0.103333	12.9267	6.9669	3.99202e-15	4.19273e-13	Up
lnc-MSTRG.24692.4	18.3033	0.586667	-4.96342	4.23305e-15	4.32572e-13	Down
lnc-MSTRG.22468.1	0.00666667	7.59333	10.1536	4.4246e-15	4.40247e-13	Up
lnc-MSTRG.13550.1	398.543	35.9833	-3.46934	4.91398e-15	4.76404e-13	Down
lnc-MSTRG.30355.1	0.001	13.39	13.7089	5.58835e-15	5.28239e-13	Up
lnc-MSTRG.16441.1	1.04333	29.1433	4.80389	6.50116e-15	5.99534e-13	Up
lnc-MSTRG.18791.1	0.0933333	4.16333	5.4792	8.9374e-15	8.04579e-13	Up
lnc-MSTRG.32442.1	0.0666667	5.17	6.27705	1.5188e-14	1.33548e-12	Up
lnc-MSTRG.3925.1	1.41	12.23	3.11666	1.58276e-14	1.36009e-12	Up
lnc-MSTRG.5708.2	21.4033	0.0966667	-7.7906	2.17071e-14	1.82388e-12	Down
lnc-MSTRG.26052.1	12.82	1.24333	-3.36611	2.42888e-14	1.99643e-12	Down
lnc-MSTRG.33493.1	0.02	21.6133	10.0777	2.90374e-14	2.33597e-12	Up
lnc-MSTRG.14269.1	0.00666667	5.29333	9.633	3.0211e-14	2.37288e-12	Up
lnc-MSTRG.8827.3	4.88667	0.0333333	-7.19574	3.07514e-14	2.37288e-12	Down
lnc-MSTRG.19714.3	0.516667	6.52	3.65757	3.43001e-14	2.59378e-12	Up
lnc-MSTRG.24639.1	2.87667	0.173333	-4.05278	5.06448e-14	3.75466e-12	Down
lnc-MSTRG.2829.1	0.296667	8.54	4.84732	8.99671e-14	6.54165e-12	Up
lnc-MSTRG.14644.1	5.51	0.0933333	-5.88352	1.30319e-13	9.29694e-12	Down
lnc-MSTRG.14644.2	7.74333	0.31	-4.64261	1.51285e-13	1.032e-11	Down
lnc-MSTRG.8085.1	15.2833	0.356667	-5.42124	1.52271e-13	1.032e-11	Down
lnc-MSTRG.3597.2	0.266667	3.68667	3.78921	1.52849e-13	1.032e-11	Up
lnc-MSTRG.5878.1	0.0566667	9.74667	7.42626	1.70217e-13	1.1291e-11	Up
lnc-MSTRG.1451.1	1.43333	16.64	3.53721	2.49178e-13	1.62438e-11	Up
lnc-MSTRG.18562.2	0.001	6.52667	12.6721	1.07503e-12	6.8083e-11	Up
lnc-MSTRG.12906.1	0.001	4.04667	11.9825	1.0804e-12	6.8083e-11	Up
lnc-MSTRG.8302.1	8.22	0.05	-7.36107	1.2135e-12	7.52172e-11	Down
lnc-MSTRG.11771.1	0.536667	4.56667	3.08904	1.45934e-12	8.89965e-11	Up
lnc-MSTRG.23511.1	2.96667	0.001	-11.5346	1.48404e-12	8.9066e-11	Down
lnc-MSTRG.28414.1	26.72	5.14	-2.37808	1.72222e-12	1.01746e-10	Down
lnc-MSTRG.8409.1	0.001	8.52667	13.0578	1.93164e-12	1.12362e-10	Up
lnc-MSTRG.21730.1	0.1	9.45	6.56224	2.35661e-12	1.35005e-10	Up
lnc-MSTRG.19787.1	0.09	3.22	5.16099	2.948e-12	1.66364e-10	Up
lnc-MSTRG.7241.1	0.0333333	9.14	8.09908	3.22006e-12	1.79045e-10	Up
lnc-MSTRG.19426.2	24.1433	0.953333	-4.6625	3.78993e-12	2.07677e-10	Down
lnc-MSTRG.751.3	1.82333	10.7367	2.5579	4.61459e-12	2.49254e-10	Up
lnc-MSTRG.15156.1	2.82	0.001	-11.4615	6.1451e-12	3.27248e-10	Down
lnc-MSTRG.10202.1	0.1	2.33333	4.54432	6.27476e-12	3.29512e-10	Up
lnc-MSTRG.26395.1	0.001	3.26667	11.6736	7.41458e-12	3.84035e-10	Up
lnc-MSTRG.26825.1	0.001	2.63333	11.3627	8.96001e-12	4.57808e-10	Up
lnc-MSTRG.3976.2	0.001	6.77333	12.7257	1.09705e-11	5.52185e-10	Up
lnc-MSTRG.10003.1	0.001	4.07667	11.9932	1.10992e-11	5.52185e-10	Up
lnc-MSTRG.32157.1	0.57	6.78667	3.57367	1.26806e-11	6.22667e-10	Up
lnc-MSTRG.34278.1	15.7267	1.15333	-3.76933	1.42572e-11	6.91106e-10	Down
lnc-MSTRG.26296.1	2.38	0.18	-3.72489	1.64247e-11	7.86099e-10	Down
lnc-MSTRG.873.1	9.85333	0.0733333	-7.07	1.75158e-11	8.27838e-10	Down
lnc-MSTRG.33246.1	0.001	1.71333	10.7426	1.88449e-11	8.79663e-10	Up
lnc-MSTRG.12262.1	1.88333	0.001	-10.8791	1.95125e-11	8.99715e-10	Down
lnc-MSTRG.14185.1	0.0166667	6.63333	8.63662	2.60585e-11	1.18708e-09	Up
lnc-MSTRG.4951.1	2.71	0.001	-11.4041	2.91249e-11	1.31097e-09	Down
lnc-MSTRG.33031.2	2.91333	0.001	-11.5085	5.12337e-11	2.279e-09	Down
lnc-MSTRG.33907.1	0.001	2.77333	11.4374	5.7591e-11	2.51894e-09	Up
lnc-MSTRG.14079.1	0.001	2.51333	11.2954	5.79603e-11	2.51894e-09	Up
lnc-MSTRG.11555.1	1.25333	0.001	-10.2916	6.31495e-11	2.71328e-09	Down
lnc-MSTRG.24961.1	28.1633	3.01667	-3.22279	8.3681e-11	3.55503e-09	Down
lnc-MSTRG.12721.1	0.001	7.07333	12.7882	9.32252e-11	3.91649e-09	Up
lnc-MSTRG.5028.1	0.186667	3.54	4.24521	1.0195e-10	4.23596e-09	Up
lnc-MSTRG.13593.1	2.80667	0.05	-5.81079	1.09596e-10	4.50415e-09	Down
lnc-MSTRG.6544.1	0.001	9.08667	13.1495	1.79948e-10	7.31593e-09	Up
lnc-MSTRG.19220.1	4.15333	0.0133333	-8.28309	2.44753e-10	9.84478e-09	Down
lnc-MSTRG.18120.1	3.35333	0.001	-11.7114	2.86805e-10	1.14148e-08	Down
lnc-MSTRG.844.2	2.93333	0.3	-3.28951	2.9524e-10	1.16281e-08	Down
lnc-MSTRG.4099.2	0.001	1.82	10.8297	3.41453e-10	1.33096e-08	Up
lnc-MSTRG.21544.2	2.07667	0.116667	-4.15381	3.51409e-10	1.3558e-08	Down
lnc-MSTRG.15539.4	0.02	6.79	8.40727	4.07132e-10	1.55492e-08	Up
lnc-MSTRG.19917.1	0.001	6.06333	12.5659	4.70645e-10	1.77951e-08	Up
lnc-MSTRG.6929.1	0.41	7.62333	4.21673	4.83925e-10	1.81161e-08	Up
lnc-MSTRG.15630.1	0.0633333	1.21667	4.26383	4.98507e-10	1.8479e-08	Up
lnc-MSTRG.2493.1	2.46667	0.0233333	-6.72403	5.90746e-10	2.16855e-08	Down
lnc-MSTRG.33473.1	5	0.05	-6.64386	6.33254e-10	2.30224e-08	Down
lnc-MSTRG.2269.1	0.0433333	2.02333	5.54511	6.47924e-10	2.33314e-08	Up
lnc-MSTRG.31563.1	6.41667	0.246667	-4.70119	7.13363e-10	2.54455e-08	Down
lnc-MSTRG.4242.1	0.001	0.903333	9.81911	7.6378e-10	2.69893e-08	Up
lnc-MSTRG.17897.1	1.65667	0.00666667	-7.9571	8.45444e-10	2.95984e-08	Down
lnc-MSTRG.19584.1	6.98667	0.39	-4.16306	1.1826e-09	4.10222e-08	Down
lnc-MSTRG.13961.1	15.2433	0.643333	-4.56647	1.22955e-09	4.22631e-08	Down
lnc-MSTRG.25316.1	2.02333	0.001	-10.9825	1.30461e-09	4.44391e-08	Down
lnc-MSTRG.12384.4	1.42667	6.88333	2.27046	1.50053e-09	5.06561e-08	Up
lnc-MSTRG.5788.1	4.85	0.26	-4.2214	1.6768e-09	5.61059e-08	Down
lnc-MSTRG.31575.1	0.001	1.6	10.6439	1.75851e-09	5.8324e-08	Up
lnc-MSTRG.15006.1	0.001	2.57	11.3276	1.97599e-09	6.49673e-08	Up
lnc-MSTRG.17196.1	8.52	0.256667	-5.05289	2.09892e-09	6.84138e-08	Down
lnc-MSTRG.18137.1	9.86333	1.10667	-3.15585	2.19292e-09	7.08669e-08	Down
lnc-MSTRG.23834.1	0.313333	13.4	5.41839	2.36822e-09	7.58834e-08	Up
lnc-MSTRG.30504.1	2.36	0.001	-11.2046	2.4014e-09	7.63e-08	Down
lnc-MSTRG.28230.1	1.98667	0.001	-10.9561	2.52513e-09	7.95625e-08	Down
lnc-MSTRG.24182.2	0.0733333	2.40667	5.03642	4.57675e-09	1.43014e-07	Up
lnc-MSTRG.658.1	0.001	2.30667	11.1716	5.0111e-09	1.55303e-07	Up
lnc-MSTRG.12746.1	3.37667	17.6367	2.38491	5.89853e-09	1.8132e-07	Up
lnc-MSTRG.9681.1	0.11	19.6933	7.48406	6.32946e-09	1.92998e-07	Up
lnc-MSTRG.13108.1	0.06	3.71	5.95031	6.50149e-09	1.96657e-07	Up
lnc-MSTRG.27147.1	8.27	0.001	-13.0137	6.9786e-09	2.09414e-07	Down
lnc-MSTRG.18381.2	0.0433333	2.05	5.564	7.34248e-09	2.18598e-07	Up
lnc-MSTRG.29753.1	1.26667	0.001	-10.3068	9.65717e-09	2.85264e-07	Down
lnc-MSTRG.24199.1	2.96667	0.001	-11.5346	1.05557e-08	3.09134e-07	Down
lnc-MSTRG.28438.1	3.35667	0.34	-3.30342	1.06288e-08	3.09134e-07	Down
lnc-MSTRG.12906.2	0.001	2.36667	11.2086	1.13191e-08	3.26697e-07	Up
lnc-MSTRG.5358.1	0.28	2.82667	3.3356	1.23607e-08	3.5406e-07	Up
lnc-MSTRG.18445.1	0.001	4.35	12.0868	1.34053e-08	3.81093e-07	Up
lnc-MSTRG.6518.1	0.001	2.87333	11.4885	1.36788e-08	3.85968e-07	Up
lnc-MSTRG.11415.1	0.146667	10.6933	6.18803	1.38334e-08	3.87438e-07	Up
lnc-MSTRG.22023.1	0.001	3.41	11.7356	1.4651e-08	4.07318e-07	Up
lnc-MSTRG.24638.1	6.29	0.223333	-4.81579	1.5501e-08	4.27805e-07	Down
lnc-MSTRG.8614.1	0.001	2.85	11.4767	1.75901e-08	4.81943e-07	Up
lnc-MSTRG.21671.1	0.0666667	7.05667	6.72588	1.80581e-08	4.91205e-07	Up
lnc-MSTRG.10736.1	0.00666667	3.33667	8.96723	1.98687e-08	5.34367e-07	Up
lnc-MSTRG.1480.1	0.323333	4.65333	3.84717	1.99275e-08	5.34367e-07	Up
lnc-MSTRG.20519.2	5.41333	0.683333	-2.98586	2.05877e-08	5.48185e-07	Down
lnc-MSTRG.4480.1	16.63	0.42	-5.30726	2.41784e-08	6.3929e-07	Down
lnc-MSTRG.4363.1	0.001	1.75667	10.7786	2.46436e-08	6.47066e-07	Up
lnc-MSTRG.21866.1	4.33667	0.136667	-4.98785	2.579e-08	6.72497e-07	Down
lnc-MSTRG.21339.1	2.16667	0.001	-11.0813	2.76328e-08	7.15615e-07	Down
lnc-MSTRG.13417.1	5.5	0.0766667	-6.16469	2.91175e-08	7.48933e-07	Down
lnc-MSTRG.5026.1	2.32667	0.0333333	-6.12516	3.11685e-08	7.96271e-07	Down
lnc-MSTRG.7926.1	0.001	4.69667	12.1974	3.14819e-08	7.98879e-07	Up
lnc-MSTRG.17852.1	9.12333	0.18	-5.66349	3.21271e-08	8.09817e-07	Down
lnc-MSTRG.16456.1	0.001	3.19	11.6393	3.92846e-08	9.83676e-07	Up
lnc-MSTRG.19565.3	3.68667	0.48	-2.94121	3.99414e-08	9.93543e-07	Down
lnc-MSTRG.6584.1	11.1867	1.58	-2.82378	5.06901e-08	1.25268e-06	Down
lnc-MSTRG.25908.3	0.001	2.00667	10.9706	5.13103e-08	1.25977e-06	Up
lnc-MSTRG.9538.2	2.16	0.0733333	-4.88042	5.56831e-08	1.35831e-06	Down
lnc-MSTRG.56.1	1.44333	13.92	3.26968	5.81025e-08	1.40824e-06	Up
lnc-MSTRG.22743.2	0.396667	2.92667	2.88326	5.89981e-08	1.42084e-06	Up
lnc-MSTRG.19607.2	0.001	1.29333	10.3369	6.21112e-08	1.48634e-06	Up
lnc-MSTRG.10366.2	4.55333	17.0567	1.90534	6.35582e-08	1.51141e-06	Up
lnc-MSTRG.25265.1	0.001	2.73	11.4147	6.46714e-08	1.52827e-06	Up
lnc-MSTRG.7328.1	2.50667	0.0233333	-6.74723	6.63401e-08	1.55796e-06	Down
lnc-MSTRG.4320.1	2.53667	0.001	-11.3087	6.99818e-08	1.63334e-06	Down
lnc-MSTRG.25942.3	7.59667	20.28	1.41662	7.28325e-08	1.68945e-06	Up
lnc-MSTRG.17279.1	11.35	1.17333	-3.27401	7.35661e-08	1.69606e-06	Down
lnc-MSTRG.2403.1	2.15667	0.36	-2.58273	8.48026e-08	1.94061e-06	Down
lnc-MSTRG.15033.1	0.001	2.25667	11.14	8.51999e-08	1.94061e-06	Up
lnc-MSTRG.21563.1	3.88	0.29	-3.74193	8.75661e-08	1.97358e-06	Down
lnc-MSTRG.34159.1	2.28	0.223333	-3.35176	8.76915e-08	1.97358e-06	Down
lnc-MSTRG.24387.2	2.23667	0.001	-11.1271	9.26863e-08	2.07365e-06	Down
lnc-MSTRG.7798.3	2.32667	0.001	-11.184	9.96043e-08	2.21532e-06	Down
lnc-MSTRG.26448.1	1.84667	0.001	-10.8507	1.01416e-07	2.24242e-06	Down
lnc-MSTRG.27121.1	0.113333	4.25	5.22882	1.03377e-07	2.27249e-06	Up
lnc-MSTRG.21188.1	0.976667	0.001	-9.93172	1.0433e-07	2.27857e-06	Down
lnc-MSTRG.34505.1	0.2	2.00333	3.32433	1.04859e-07	2.27857e-06	Up
lnc-MSTRG.20388.2	1.21333	0.0733333	-4.04836	1.05552e-07	2.28052e-06	Down
lnc-MSTRG.617.1	2.17333	0.0266667	-6.34873	1.11078e-07	2.37308e-06	Down
lnc-MSTRG.22148.1	4.45667	0.04	-6.79982	1.11091e-07	2.37308e-06	Down
lnc-MSTRG.33188.1	4.76667	0.136667	-5.12425	1.18106e-07	2.50875e-06	Down
lnc-MSTRG.2406.4	4.48333	0.14	-5.00107	1.20812e-07	2.55189e-06	Down
lnc-MSTRG.12231.1	0.01	1.78333	7.47843	1.33949e-07	2.81368e-06	Up
lnc-MSTRG.6017.1	0.001	1.82667	10.835	1.39402e-07	2.91204e-06	Up
lnc-MSTRG.18939.1	0.001	1.67333	10.7085	1.56684e-07	3.24035e-06	Up
lnc-MSTRG.1194.1	0.183333	6.59333	5.16847	1.56832e-07	3.24035e-06	Up
lnc-MSTRG.22855.1	0.00666667	1.12333	7.3966	1.61505e-07	3.31875e-06	Up
lnc-MSTRG.12746.2	1.80667	13.08	2.85596	1.68722e-07	3.44832e-06	Up
lnc-MSTRG.2465.1	0.173333	4.22667	4.6079	1.70414e-07	3.46417e-06	Up
lnc-MSTRG.4766.1	3.83667	0.973333	-1.97885	1.97083e-07	3.98487e-06	Down
lnc-MSTRG.11251.2	0.001	1.72667	10.7538	2.14107e-07	4.30605e-06	Up
lnc-MSTRG.25168.1	5.93	0.326667	-4.18214	2.23258e-07	4.46634e-06	Down
lnc-MSTRG.21315.1	3.94	0.0766667	-5.68345	2.45664e-07	4.88871e-06	Down
lnc-MSTRG.10001.1	0.001	2.01667	10.9778	2.64331e-07	5.23264e-06	Up
lnc-MSTRG.26156.1	21.3833	3.3	-2.69595	2.73987e-07	5.39556e-06	Down
lnc-MSTRG.30471.1	2.14667	0.001	-11.0679	2.78279e-07	5.45167e-06	Down
lnc-MSTRG.21339.2	2.78	0.001	-11.4409	2.89188e-07	5.63618e-06	Down
lnc-MSTRG.21671.2	0.32	3.28667	3.36048	3.13929e-07	6.08701e-06	Up
lnc-MSTRG.21613.1	3.59333	0.17	-4.40172	3.26368e-07	6.2959e-06	Down
lnc-MSTRG.18019.1	1.74667	0.001	-10.7704	3.35223e-07	6.43391e-06	Down
lnc-MSTRG.23809.2	0.243333	2.29667	3.23854	3.50722e-07	6.69738e-06	Up
lnc-MSTRG.18545.1	2.64333	0.001	-11.3681	3.59282e-07	6.82636e-06	Down
lnc-MSTRG.4951.3	12.01	0.306667	-5.29142	3.87726e-07	7.32996e-06	Down
lnc-MSTRG.33966.1	7.43	0.29	-4.67924	3.8971e-07	7.33081e-06	Down
lnc-MSTRG.3977.1	0.001	1.43667	10.4885	3.98088e-07	7.45133e-06	Up
lnc-MSTRG.14700.1	1.99	0.001	-10.9586	4.35396e-07	8.10951e-06	Down
lnc-MSTRG.31916.1	4.15333	0.03	-7.11316	4.60915e-07	8.54275e-06	Down
lnc-MSTRG.25818.1	0.0233333	3.47333	7.21778	4.68567e-07	8.6422e-06	Up
lnc-MSTRG.26740.1	0.326667	4.1	3.64973	4.88239e-07	8.96132e-06	Up
lnc-MSTRG.32789.1	0.1	1.23	3.62059	4.92943e-07	9.00394e-06	Up
lnc-MSTRG.17339.1	1.58333	0.106667	-3.89178	4.97012e-07	9.03463e-06	Down
lnc-MSTRG.4262.1	10.8633	2.02667	-2.42229	5.08368e-07	9.19684e-06	Down
lnc-MSTRG.17768.1	0.0433333	2.02	5.54273	5.25153e-07	9.42175e-06	Up
lnc-MSTRG.9546.1	5.86333	0.0966667	-5.92256	5.25784e-07	9.42175e-06	Down
lnc-MSTRG.2918.1	0.0233333	1.64333	6.13809	5.3295e-07	9.50512e-06	Up
lnc-MSTRG.12906.3	0.0433333	2.92333	6.07599	5.46061e-07	9.69323e-06	Up
lnc-MSTRG.17832.1	0.001	0.923333	9.85071	5.65687e-07	9.99468e-06	Up
lnc-MSTRG.15701.1	0.001	1.68	10.7142	6.06584e-07	1.06674e-05	Up
lnc-MSTRG.15212.2	0.816667	5.09	2.63985	6.3025e-07	1.10323e-05	Up
lnc-MSTRG.11681.1	0.001	1.04667	10.0316	6.57292e-07	1.14526e-05	Up
lnc-MSTRG.11042.1	0.0266667	1.84	6.10852	6.66449e-07	1.15589e-05	Up
lnc-MSTRG.15586.1	0.14	3.13667	4.48573	7.53909e-07	1.30161e-05	Up
lnc-MSTRG.32809.2	0.93	0.001	-9.86109	7.87706e-07	1.35378e-05	Down
lnc-MSTRG.33478.1	0.0266667	1.94	6.18488	8.02569e-07	1.37308e-05	Up
lnc-MSTRG.26043.1	1.14	0.0233333	-5.6105	8.95593e-07	1.52533e-05	Down
lnc-MSTRG.5100.1	2.65	0.0166667	-7.31288	9.33196e-07	1.58225e-05	Down
lnc-MSTRG.21462.1	0.001	1.88333	10.8791	9.38664e-07	1.58441e-05	Up
lnc-MSTRG.25330.1	0.24	7.58333	4.98173	1.02039e-06	1.71472e-05	Up
lnc-MSTRG.26239.4	0.276667	1.59333	2.52583	1.06615e-06	1.78368e-05	Up
lnc-MSTRG.14310.1	1.66667	0.001	-10.7027	1.07965e-06	1.7983e-05	Down
lnc-MSTRG.15548.1	2.42667	11.4	2.23199	1.09371e-06	1.81374e-05	Up
lnc-MSTRG.19426.3	4.16333	0.35	-3.57231	1.10329e-06	1.82164e-05	Down
lnc-MSTRG.31735.3	0.0733333	3.4	5.53492	1.16157e-06	1.90952e-05	Up
lnc-MSTRG.33156.1	0.08	1.11	3.79442	1.16949e-06	1.91421e-05	Up
lnc-MSTRG.122.1	207.467	28.93	-2.84224	1.27958e-06	2.08538e-05	Down
lnc-MSTRG.4388.1	0.176667	3.01	4.09066	1.28559e-06	2.08619e-05	Up
lnc-MSTRG.23257.1	0.0766667	4.60667	5.90898	1.34339e-06	2.17067e-05	Up
lnc-MSTRG.18143.1	0.89	0.001	-9.79766	1.38358e-06	2.22609e-05	Down
lnc-MSTRG.13283.1	0.986667	0.001	-9.94642	1.4579e-06	2.33572e-05	Down
lnc-MSTRG.18791.2	0.0733333	2.73667	5.22181	1.57986e-06	2.52044e-05	Up
lnc-MSTRG.8300.1	3.32667	0.423333	-2.97421	1.60736e-06	2.54293e-05	Down
lnc-MSTRG.34596.1	40.14	7.84	-2.35612	1.60741e-06	2.54293e-05	Down
lnc-MSTRG.29829.1	1.99	0.33	-2.59223	1.63521e-06	2.57614e-05	Down
lnc-MSTRG.5151.1	0.001	2.15667	11.0746	1.72471e-06	2.70586e-05	Up
lnc-MSTRG.20546.2	0.001	3.03667	11.5683	1.74774e-06	2.73067e-05	Up
lnc-MSTRG.18501.2	1.39333	0.0333333	-5.38543	1.76469e-06	2.7458e-05	Down
lnc-MSTRG.14812.1	0.446667	2.98667	2.74127	1.8848e-06	2.92067e-05	Up
lnc-MSTRG.17225.1	0.0966667	2.07333	4.42279	1.93745e-06	2.99e-05	Up
lnc-MSTRG.4070.1	0.001	1.36333	10.4129	1.99365e-06	3.06422e-05	Up
lnc-MSTRG.34037.1	2.84	0.0333333	-6.41278	2.16275e-06	3.31067e-05	Down
lnc-MSTRG.27637.1	3.28333	15.7967	2.26639	2.19564e-06	3.33861e-05	Up
lnc-MSTRG.7987.1	0.14	3.69	4.72012	2.19866e-06	3.33861e-05	Up
lnc-MSTRG.17704.1	0.06	1.67333	4.80162	2.28944e-06	3.46254e-05	Up
lnc-MSTRG.31735.1	0.001	0.783333	9.61348	2.36509e-06	3.56271e-05	Up
lnc-MSTRG.29753.2	0.493333	0.001	-8.94642	2.38787e-06	3.58275e-05	Down
lnc-MSTRG.21520.1	4.01333	0.596667	-2.7498	2.56524e-06	3.83367e-05	Down
lnc-MSTRG.28165.1	0.916667	0.001	-9.84025	2.6769e-06	3.98467e-05	Down
lnc-MSTRG.23785.1	0.001	1.61667	10.6588	2.68736e-06	3.98467e-05	Up
lnc-MSTRG.22502.1	2.36	0.001	-11.2046	2.90656e-06	4.29285e-05	Down
lnc-MSTRG.13356.1	0.0466667	1.27	4.76629	3.14481e-06	4.61673e-05	Up
lnc-MSTRG.24321.1	0.001	1.85	10.8533	3.15027e-06	4.61673e-05	Up
lnc-MSTRG.21543.1	0.143333	3.11333	4.44101	3.33167e-06	4.85135e-05	Up
lnc-MSTRG.1796.1	1.19667	0.001	-10.2248	3.33602e-06	4.85135e-05	Down
lnc-MSTRG.14430.1	0.39	4.38333	3.49048	3.36915e-06	4.88075e-05	Up
lnc-MSTRG.27340.1	1.53333	0.001	-10.5825	3.49473e-06	5.04335e-05	Down
lnc-MSTRG.16790.1	1.99333	0.186667	-3.41665	3.64513e-06	5.2404e-05	Down
lnc-MSTRG.29954.1	0.001	4.14	12.0154	3.84928e-06	5.51292e-05	Up
lnc-MSTRG.8952.1	4.2	0.0666667	-5.97728	3.87645e-06	5.53089e-05	Down
lnc-MSTRG.30768.1	2.75	0.453333	-2.60079	3.91899e-06	5.57057e-05	Down
lnc-MSTRG.1461.1	0.001	0.86	9.74819	3.96146e-06	5.59931e-05	Up
lnc-MSTRG.32526.1	0.07	1.39667	4.31849	3.96883e-06	5.59931e-05	Up
lnc-MSTRG.13074.1	0.001	1.58	10.6257	4.15906e-06	5.84588e-05	Up
lnc-MSTRG.21496.1	0.106667	13.7733	7.01262	4.26989e-06	5.97943e-05	Up
lnc-MSTRG.20287.1	2.44333	0.0433333	-5.81723	4.51064e-06	6.29326e-05	Down
lnc-MSTRG.7724.1	0.001	1.4	10.4512	4.58172e-06	6.36893e-05	Up
lnc-MSTRG.6694.1	4.36	0.403333	-3.43428	4.60809e-06	6.38213e-05	Down
lnc-MSTRG.31556.1	6.71	0.12	-5.80521	4.66064e-06	6.43135e-05	Down
lnc-MSTRG.32809.3	3.05667	0.48	-2.67085	5.29509e-06	7.28027e-05	Down
lnc-MSTRG.11820.1	64.5367	16.4633	-1.97086	5.36398e-06	7.34827e-05	Down
lnc-MSTRG.25316.2	1.88	0.08	-4.55459	5.69687e-06	7.77613e-05	Down
lnc-MSTRG.23433.4	1.50333	0.0133333	-6.81698	5.72986e-06	7.79302e-05	Down
lnc-MSTRG.25439.1	1.58333	0.0833333	-4.24793	5.81964e-06	7.88675e-05	Down
lnc-MSTRG.16228.1	0.001	1.53	10.5793	5.90594e-06	7.97513e-05	Up
lnc-MSTRG.24182.3	0.02	1.30333	6.02606	6.18311e-06	8.3197e-05	Up
lnc-MSTRG.26795.1	1.04	5.33333	2.35845	6.37385e-06	8.54593e-05	Up
lnc-MSTRG.4851.2	0.186667	1.78333	3.25604	6.41718e-06	8.57362e-05	Up
lnc-MSTRG.2426.1	1.73667	0.001	-10.7621	6.8561e-06	9.12779e-05	Down
lnc-MSTRG.14710.1	0.59	4.40667	2.9009	6.91166e-06	9.16947e-05	Up
lnc-MSTRG.27762.1	0.93	0.001	-9.86109	7.00606e-06	9.24654e-05	Down
lnc-MSTRG.23290.1	0.266667	4.53667	4.08852	7.01866e-06	9.24654e-05	Up
lnc-MSTRG.17111.1	0.001	1.32667	10.3736	7.28829e-06	9.56841e-05	Up
lnc-MSTRG.6122.1	1.38333	0.0533333	-4.69697	7.34567e-06	9.61037e-05	Down
lnc-MSTRG.56.2	60.6433	316.04	2.38169	7.428e-06	9.68457e-05	Up
lnc-MSTRG.13922.1	1.81333	0.0166667	-6.76553	7.76946e-06	0.00010095	Down
lnc-MSTRG.18824.1	3.07	0.483333	-2.66715	8.06336e-06	0.000104409	Down
lnc-MSTRG.23615.1	0.236667	5.24	4.46864	8.39376e-06	0.000108317	Up
lnc-MSTRG.10725.1	0.143333	2.12333	3.88888	8.59057e-06	0.000110479	Up
lnc-MSTRG.20337.1	4.82	1.27333	-1.92042	8.69206e-06	0.000111406	Down
lnc-MSTRG.9249.1	0.433333	3.1	2.83872	1.0053e-05	0.000128414	Up
lnc-MSTRG.27885.1	0.001	1.99333	10.961	1.05675e-05	0.000134531	Up
lnc-MSTRG.5375.1	5.21333	13.8567	1.4103	1.06867e-05	0.000135593	Up
lnc-MSTRG.29399.1	0.916667	0.001	-9.84025	1.11959e-05	0.000141403	Down
lnc-MSTRG.22689.1	1.79333	0.316667	-2.50161	1.12195e-05	0.000141403	Down
lnc-MSTRG.27073.1	0.001	2.87333	11.4885	1.13313e-05	0.000142338	Up
lnc-MSTRG.8798.1	1	0.001	-9.96578	1.14284e-05	0.000143082	Down
lnc-MSTRG.13252.1	0.316667	4.44	3.80952	1.14951e-05	0.000143442	Up
lnc-MSTRG.9440.1	1.74	0.04	-5.44294	1.16312e-05	0.000144663	Down
lnc-MSTRG.24388.1	2.82	0.0766667	-5.20095	1.18786e-05	0.000147256	Down
lnc-MSTRG.15917.1	3.67667	0.49	-2.90754	1.23484e-05	0.000152579	Down
lnc-MSTRG.22743.1	0.64	5.40333	3.07771	1.24311e-05	0.000152964	Up
lnc-MSTRG.8987.1	0.001	0.623333	9.28386	1.24604e-05	0.000152964	Up
lnc-MSTRG.30048.1	0.513333	3.47667	2.75974	1.26843e-05	0.000155208	Up
lnc-MSTRG.26262.1	1.79667	0.0166667	-6.75221	1.3082e-05	0.000159559	Down
lnc-MSTRG.19729.1	2.60333	0.54	-2.26933	1.31884e-05	0.000160339	Down
lnc-MSTRG.14313.1	1.60333	0.001	-10.6469	1.35279e-05	0.000163938	Down
lnc-MSTRG.34434.1	0.001	1.24333	10.28	1.46591e-05	0.000177079	Up
lnc-MSTRG.17627.1	0.001	2.04	10.9944	1.48261e-05	0.000178179	Up
lnc-MSTRG.13508.1	2.14	0.0966667	-4.46845	1.48827e-05	0.000178179	Down
lnc-MSTRG.34147.1	0.001	1.49	10.5411	1.48915e-05	0.000178179	Up
lnc-MSTRG.4189.1	0.0533333	1.22	4.5157	1.50511e-05	0.000179522	Up
lnc-MSTRG.32773.2	1.39	4.36333	1.65035	1.5182e-05	0.000180513	Up
lnc-MSTRG.7182.1	2.74	0.001	-11.42	1.54061e-05	0.000182604	Down
lnc-MSTRG.2655.2	6.15333	0.606667	-3.34239	1.57594e-05	0.000186207	Down
lnc-MSTRG.19483.1	1.12667	0.001	-10.1378	1.59422e-05	0.00018778	Down
lnc-MSTRG.4491.1	2.45333	0.513333	-2.25678	1.60865e-05	0.000188892	Down
lnc-MSTRG.29078.1	3.28333	0.001	-11.6809	1.6824e-05	0.00019694	Down
lnc-MSTRG.32389.1	1.59667	0.0233333	-6.09653	1.78959e-05	0.000208841	Down
lnc-MSTRG.28052.1	1.28333	0.106667	-3.58871	1.80539e-05	0.000210037	Down
lnc-MSTRG.23223.3	1.51	0.183333	-3.04201	1.8485e-05	0.000214392	Down
lnc-MSTRG.19607.3	0.0833333	3.84667	5.52857	1.86647e-05	0.000215332	Up
lnc-MSTRG.29344.1	2.37667	0.153333	-3.9542	1.868e-05	0.000215332	Down
lnc-MSTRG.32926.1	0.0666667	1.87667	4.81506	1.94423e-05	0.000223247	Up
lnc-MSTRG.443.1	0.001	1.60667	10.6499	1.95288e-05	0.000223247	Up
lnc-MSTRG.24988.1	0.293333	0.001	-8.1964	1.95437e-05	0.000223247	Down
lnc-MSTRG.32357.1	2.49	0.396667	-2.65015	1.96589e-05	0.000223886	Down
lnc-MSTRG.20162.1	1.12667	0.001	-10.1378	2.08083e-05	0.000235603	Down
lnc-MSTRG.15900.2	0.773333	4.19667	2.44008	2.08123e-05	0.000235603	Up
lnc-MSTRG.16977.1	0.001	0.74	9.53138	2.21596e-05	0.000250106	Up
lnc-MSTRG.17481.1	8.76333	0.206667	-5.4061	2.24292e-05	0.000252395	Down
lnc-MSTRG.28721.1	1.31333	4.1	1.64239	2.30732e-05	0.000258872	Up
lnc-MSTRG.21486.1	0.74	4.93333	2.73697	2.44072e-05	0.000273029	Up
lnc-MSTRG.21020.1	91.5933	20.4367	-2.16408	2.47229e-05	0.000275745	Down
lnc-MSTRG.2049.1	4.73	0.87	-2.44275	2.48622e-05	0.000276332	Down
lnc-MSTRG.6694.2	1.6	0.143333	-3.48063	2.497e-05	0.000276332	Down
lnc-MSTRG.22082.2	0.8	0.001	-9.64386	2.49949e-05	0.000276332	Down
lnc-MSTRG.173.1	0.856667	0.001	-9.74259	2.52354e-05	0.000278178	Down
lnc-MSTRG.14251.1	0.001	1.09	10.0901	2.63299e-05	0.000289399	Up
lnc-MSTRG.28827.2	0.213333	1.99333	3.224	2.64177e-05	0.000289523	Up
lnc-MSTRG.7107.1	0.0333333	1.33667	5.32553	2.66167e-05	0.000290861	Up
lnc-MSTRG.22962.2	1.08333	0.02	-5.75933	2.70252e-05	0.000294473	Down
lnc-MSTRG.10523.1	1.13333	0.05	-4.5025	2.76198e-05	0.000300088	Down
lnc-MSTRG.22613.1	8.44	0.226667	-5.2186	2.91168e-05	0.000315446	Down
lnc-MSTRG.7248.1	0.11	0.956667	3.12051	2.92864e-05	0.000316377	Up
lnc-MSTRG.20997.1	0.203333	3.27333	4.00884	3.02367e-05	0.000325713	Up
lnc-MSTRG.32486.1	0.543333	3.96333	2.8668	3.05677e-05	0.000328342	Up
lnc-MSTRG.2515.1	0.001	1.16667	10.1882	3.11521e-05	0.000333672	Up
lnc-MSTRG.23875.1	0.106667	1.52667	3.8392	3.13993e-05	0.000335369	Up
lnc-MSTRG.312.1	0.001	2.19	11.0967	3.2016e-05	0.000340993	Up
lnc-MSTRG.17897.2	1.71333	0.001	-10.7426	3.21794e-05	0.000341771	Down
lnc-MSTRG.6838.1	0.69	0.0433333	-3.99305	3.23303e-05	0.000342411	Down
lnc-MSTRG.13671.1	0.126667	1.34333	3.40671	3.28175e-05	0.000346601	Up
lnc-MSTRG.21142.1	4.28667	0.186667	-4.52132	3.29175e-05	0.000346689	Down
lnc-MSTRG.34110.1	3.12	0.09	-5.11548	3.49756e-05	0.000366685	Down
lnc-MSTRG.34595.1	18.1333	3.98	-2.1878	3.50101e-05	0.000366685	Down
lnc-MSTRG.1905.3	1.48	0.136667	-3.43686	3.61704e-05	0.000376941	Down
lnc-MSTRG.12120.1	0.16	1.91333	3.57994	3.61887e-05	0.000376941	Up
lnc-MSTRG.22810.1	0.83	0.001	-9.69697	3.68002e-05	0.000382257	Down
lnc-MSTRG.11221.2	0.001	1.07333	10.0679	3.76989e-05	0.000390519	Up
lnc-MSTRG.20310.1	0.88	0.0233333	-5.23704	3.9691e-05	0.000410032	Down
lnc-MSTRG.8060.1	0.001	0.94	9.87652	4.09671e-05	0.000422062	Up
lnc-MSTRG.33512.1	0.813333	0.07	-3.53842	4.17231e-05	0.000428463	Down
lnc-MSTRG.15819.1	0.0966667	1.05333	3.4458	4.1815e-05	0.000428463	Up
lnc-MSTRG.33623.1	8.76333	2.25667	-1.95729	4.21605e-05	0.000430232	Down
lnc-MSTRG.6917.1	0.0233333	1.21333	5.70044	4.22153e-05	0.000430232	Up
lnc-MSTRG.12953.1	8.15333	23.07	1.50056	4.28702e-05	0.000435732	Up
lnc-MSTRG.6277.1	0.913333	4.95333	2.43919	4.31753e-05	0.000437657	Up
lnc-MSTRG.28993.1	1.20667	0.01	-6.91488	4.33105e-05	0.000437853	Down
lnc-MSTRG.6123.1	0.86	0.001	-9.74819	4.3862e-05	0.000441265	Down
lnc-MSTRG.29749.2	0.25	2.73333	3.45066	4.39825e-05	0.000441265	Up
lnc-MSTRG.17895.1	0.743333	0.001	-9.53787	4.39981e-05	0.000441265	Down
lnc-MSTRG.25668.1	3.63333	14.9533	2.0411	4.60496e-05	0.000460618	Up
lnc-MSTRG.29321.1	0.001	1.25	10.2877	5.27052e-05	0.0005258	Up
lnc-MSTRG.18048.2	0.02	1.51333	6.24159	5.31363e-05	0.000528706	Up
lnc-MSTRG.17348.1	3.51667	0.223333	-3.97694	5.39492e-05	0.000535386	Down
lnc-MSTRG.23492.1	5.74333	1.15333	-2.31608	5.48298e-05	0.0005427	Down
lnc-MSTRG.25694.1	1.22	0.001	-10.2527	5.55308e-05	0.000548204	Down
lnc-MSTRG.5198.1	0.893333	0.001	-9.80305	5.6585e-05	0.000557156	Down
lnc-MSTRG.660.1	0.001	0.763333	9.57617	6.03826e-05	0.000593005	Up
lnc-MSTRG.9294.1	0.966667	4.85667	2.32888	6.48224e-05	0.000634957	Up
lnc-MSTRG.21478.1	0.603333	0.05	-3.59296	6.70048e-05	0.000654639	Down
lnc-MSTRG.7143.2	9.75333	2.55	-1.9354	6.77045e-05	0.00065977	Down
lnc-MSTRG.2156.1	9.63333	0.883333	-3.44701	6.95058e-05	0.000675078	Down
lnc-MSTRG.7780.1	2.49333	0.24	-3.37697	6.96325e-05	0.000675078	Down
lnc-MSTRG.29724.1	1.37	0.04	-5.09803	7.37916e-05	0.00071357	Down
lnc-MSTRG.5893.1	0.001	0.86	9.74819	7.4056e-05	0.0007143	Up
lnc-MSTRG.18057.1	40.47	5.94	-2.76832	7.55677e-05	0.000727027	Down
lnc-MSTRG.28975.1	0.01	0.796667	6.3159	7.84938e-05	0.000753262	Up
lnc-MSTRG.30049.1	0.406667	5.68333	3.80482	7.9215e-05	0.000758258	Up
lnc-MSTRG.33994.1	3.59	0.3	-3.58095	7.98974e-05	0.000762859	Down
lnc-MSTRG.12076.1	0.38	2.97333	2.96801	8.14519e-05	0.000775743	Up
lnc-MSTRG.6728.1	2.46667	0.08	-4.94642	8.39766e-05	0.000797777	Down
lnc-MSTRG.26291.1	0.0733333	1.48	4.33498	8.71646e-05	0.000825987	Up
lnc-MSTRG.18153.2	2.43667	0.166667	-3.86987	8.73829e-05	0.000825987	Down
lnc-MSTRG.29467.4	3.16	0.343333	-3.20224	8.86285e-05	0.000835672	Down
lnc-MSTRG.7897.1	1.78667	8.84	2.30678	8.90629e-05	0.000835692	Up
lnc-MSTRG.4509.2	1.02667	0.06	-4.09686	8.90727e-05	0.000835692	Down
lnc-MSTRG.23059.1	0.18	3.29667	4.19494	9.03737e-05	0.0008458	Up
lnc-MSTRG.28061.2	3.18667	0.553333	-2.52583	9.65379e-05	0.000901259	Down
lnc-MSTRG.5884.1	0.001	0.813333	9.6677	9.7872e-05	0.000909272	Up
lnc-MSTRG.28475.1	5.01667	1.11333	-2.17184	9.78772e-05	0.000909272	Down
lnc-MSTRG.30184.2	2.65333	0.51	-2.37924	9.89374e-05	0.000915645	Down
lnc-MSTRG.29666.2	0.0333333	2.16667	6.02237	9.90476e-05	0.000915645	Up
lnc-MSTRG.7003.2	0.16	2.24333	3.8095	0.000103217	0.000951858	Up
lnc-MSTRG.29474.1	9.53	2.79	-1.77221	0.000107809	0.000990819	Down
lnc-MSTRG.10798.1	0.01	0.62	5.9542	0.000107965	0.000990819	Up
lnc-MSTRG.7705.1	0.126667	2.51	4.30858	0.000108584	0.00099408	Up
lnc-MSTRG.20398.1	0.0366667	1.33333	5.18442	0.000108991	0.000995403	Up
lnc-MSTRG.9149.1	0.97	0.001	-9.92184	0.000112471	0.0010247	Down
lnc-MSTRG.24182.1	0.23	2.36667	3.36315	0.000116902	0.00106252	Up
lnc-MSTRG.4463.1	21.2633	2.22	-3.25974	0.000120999	0.00109712	Down
lnc-MSTRG.942.1	7.98667	1.50333	-2.40943	0.000121871	0.00110238	Down
lnc-MSTRG.28372.1	3.57	0.51	-2.80735	0.000124615	0.00112243	Down
lnc-MSTRG.28368.1	23.4933	3.13	-2.90802	0.000124681	0.00112243	Down
lnc-MSTRG.19042.1	3.84	0.166667	-4.52607	0.000126382	0.00113503	Down
lnc-MSTRG.21823.1	0.75	0.001	-9.55075	0.000127044	0.00113828	Down
lnc-MSTRG.28166.2	38.9967	11.22	-1.79728	0.000127583	0.00114041	Down
lnc-MSTRG.29558.1	0.0266667	0.843333	4.98299	0.000135391	0.00120734	Up
lnc-MSTRG.730.1	5.23333	1.84	-1.50802	0.000137223	0.0012208	Down
lnc-MSTRG.27149.1	1.22667	0.306667	-2	0.000142702	0.00126656	Down
lnc-MSTRG.4424.1	14.9167	2.66	-2.48743	0.000143814	0.00127345	Down
lnc-MSTRG.13554.1	0.17	1.56	3.19794	0.00014575	0.00128665	Up
lnc-MSTRG.21944.1	16.99	2.83333	-2.58411	0.000145986	0.00128665	Down
lnc-MSTRG.30460.3	2.39667	7.67667	1.67945	0.000148087	0.00130213	Up
lnc-MSTRG.18501.1	2.40667	0.06	-5.32593	0.000149179	0.00130869	Down
lnc-MSTRG.15540.1	0.0333333	2.00667	5.91169	0.000151221	0.00132353	Up
lnc-MSTRG.15602.1	5.97667	1.49	-2.00403	0.000154877	0.0013524	Down
lnc-MSTRG.23382.1	1.15	0.273333	-2.0729	0.000156282	0.00136153	Down
lnc-MSTRG.13488.1	0.23	2.03667	3.1465	0.000159533	0.00138665	Up
lnc-MSTRG.1402.1	0.001	1.13667	10.1506	0.000161385	0.00139954	Up
lnc-MSTRG.2489.1	0.293333	4.48333	3.93396	0.000162163	0.00140307	Up
lnc-MSTRG.3761.1	1.59667	0.16	-3.31892	0.000167379	0.00144489	Down
lnc-MSTRG.28785.1	4.39	1.28667	-1.77058	0.000167947	0.0014451	Down
lnc-MSTRG.5475.1	0.001	0.946667	9.88671	0.000168169	0.0014451	Up
lnc-MSTRG.10006.1	0.001	1.19667	10.2248	0.000170669	0.00146326	Up
lnc-MSTRG.9750.1	0.476667	0.0166667	-4.83794	0.000174695	0.00149439	Down
lnc-MSTRG.22827.1	9.88333	2.28667	-2.11175	0.000178502	0.00152351	Down
lnc-MSTRG.2976.1	6.77667	1.77333	-1.93411	0.000181971	0.00154962	Down
lnc-MSTRG.4263.1	4.67	1.10667	-2.0772	0.000182697	0.00155231	Down
lnc-MSTRG.17983.1	23.9367	3.44667	-2.79595	0.000184558	0.0015646	Down
lnc-MSTRG.2968.1	0.52	3.27667	2.65565	0.000185841	0.00157196	Up
lnc-MSTRG.19565.4	4.71	0.3	-3.97269	0.00018882	0.00159359	Down
lnc-MSTRG.11486.1	0.126667	1.83667	3.85798	0.000191206	0.00161013	Up
lnc-MSTRG.18478.1	1.95	0.08	-4.60733	0.000196913	0.00165451	Down
lnc-MSTRG.17629.1	0.001	1.06667	10.0589	0.00019786	0.00165878	Up
lnc-MSTRG.30656.1	0.203333	3.08667	3.92413	0.000200866	0.00168025	Up
lnc-MSTRG.23317.1	0.001	1.11333	10.1207	0.00020175	0.00168393	Up
lnc-MSTRG.4497.1	1.13667	0.0166667	-6.0917	0.000203709	0.00169653	Down
lnc-MSTRG.9206.1	0.386667	4.30333	3.47629	0.000208941	0.00173628	Up
lnc-MSTRG.29028.5	0.383333	3.38	3.14035	0.000210012	0.00174135	Up
lnc-MSTRG.21090.1	2.93333	0.213333	-3.78136	0.000217559	0.00179998	Down
lnc-MSTRG.16112.6	0.001	0.75	9.55075	0.000222382	0.00183587	Up
lnc-MSTRG.33812.2	0.07	1.29333	4.2076	0.000228863	0.00188525	Up
lnc-MSTRG.31733.1	1.28	0.296667	-2.10923	0.000231865	0.00190583	Down
lnc-MSTRG.1026.1	6.94333	18.2	1.39024	0.000244678	0.00200679	Up
lnc-MSTRG.28671.2	0.733333	5.29333	2.85164	0.00024812	0.00203061	Up
lnc-MSTRG.16485.1	1.68667	0.0666667	-4.66107	0.000249675	0.00203892	Down
lnc-MSTRG.24133.1	15.0867	28.91	0.938295	0.000251278	0.00204759	No
lnc-MSTRG.18949.1	6.1	0.25	-4.60881	0.00025425	0.00206736	Down
lnc-MSTRG.15004.1	2.75333	0.923333	-1.57626	0.00026338	0.002137	Down
lnc-MSTRG.1742.1	1.57667	0.001	-10.6227	0.000265957	0.00215328	Down
lnc-MSTRG.30313.1	4.98	39.4833	2.98703	0.000268361	0.0021681	Up
lnc-MSTRG.16467.1	1.53	0.39	-1.97199	0.000310104	0.00250001	Down
lnc-MSTRG.17743.1	2.08	0.303333	-2.77761	0.000317317	0.00255271	Down
lnc-MSTRG.12213.1	1.06667	0.0133333	-6.32193	0.000323161	0.00259421	Down
lnc-MSTRG.11612.1	5.38	1.4	-1.94218	0.00034383	0.00275428	Down
lnc-MSTRG.8420.1	1.25	0.001	-10.2877	0.000350548	0.00280216	Down
lnc-MSTRG.20597.1	0.0166667	0.99	5.89239	0.000352108	0.00280869	Up
lnc-MSTRG.4133.1	0.08	1.15333	3.84967	0.000359901	0.00286272	Up
lnc-MSTRG.14131.1	0.406667	4.08667	3.32901	0.000360396	0.00286272	Up
lnc-MSTRG.8868.1	0.393333	2.40333	2.61121	0.000361477	0.00286529	Up
lnc-MSTRG.18181.1	3.75	1.27333	-1.55828	0.000369221	0.00291579	Down
lnc-MSTRG.23482.2	0.97	0.001	-9.92184	0.00036939	0.00291579	Down
lnc-MSTRG.3303.1	0.973333	0.001	-9.92679	0.000374808	0.00295239	Down
lnc-MSTRG.961.1	1.53667	0.001	-10.5856	0.000388085	0.00305062	Down
lnc-MSTRG.32134.1	25.2767	7.60667	-1.73247	0.000391627	0.0030711	Down
lnc-MSTRG.24414.1	2.45333	0.33	-2.89421	0.000392315	0.0030711	Down
lnc-MSTRG.31818.1	2.16667	0.126667	-4.09637	0.000395597	0.00309039	Down
lnc-MSTRG.28572.1	1	0.001	-9.96578	0.000420741	0.00328004	Down
lnc-MSTRG.9869.2	1.94	0.156667	-3.63029	0.000426003	0.00331423	Down
lnc-MSTRG.8740.1	11.96	1.31	-3.19058	0.000446246	0.00346459	Down
lnc-MSTRG.29710.15	2.57	7.76333	1.59491	0.000459907	0.00356333	Up
lnc-MSTRG.21510.1	5.13333	1.84	-1.48019	0.000467048	0.00361127	Down
lnc-MSTRG.9317.1	0.363333	2.13	2.55149	0.000475244	0.00366714	Up
lnc-MSTRG.49.1	0.366667	1.83	2.3193	0.000487578	0.00375465	Up
lnc-MSTRG.3749.1	0.001	1.14333	10.159	0.000488657	0.00375531	Up
lnc-MSTRG.28364.1	27.08	6.26	-2.11299	0.000491201	0.0037672	Down
lnc-MSTRG.5017.4	0.486667	1.83333	1.91346	0.000500008	0.00382073	Up
lnc-MSTRG.741.1	1.00333	0.256667	-1.96683	0.000500201	0.00382073	Down
lnc-MSTRG.18680.6	1.31	3.74333	1.51476	0.000507844	0.00387128	Up
lnc-MSTRG.31116.1	0.001	1.23333	10.2683	0.000512191	0.00389657	Up
lnc-MSTRG.11753.2	0.06	1.50667	4.65025	0.000518175	0.00393418	Up
lnc-MSTRG.26127.1	0.001	1.57333	10.6196	0.000538211	0.00407811	Up
lnc-MSTRG.151.1	1.66	0.001	-10.697	0.000542912	0.0041055	Down
lnc-MSTRG.23809.1	0.0866667	2.05667	4.56869	0.000544488	0.0041092	Up
lnc-MSTRG.22110.1	1.03	3.21333	1.64143	0.000552021	0.00415775	Up
lnc-MSTRG.11709.3	0.001	0.686667	9.42347	0.000557045	0.00418725	Up
lnc-MSTRG.32261.1	0.36	0.001	-8.49185	0.000584389	0.00438395	Down
lnc-MSTRG.4509.1	2.84333	0.91	-1.64364	0.000585531	0.00438395	Down
lnc-MSTRG.15118.1	1.48333	0.0466667	-4.99031	0.00059038	0.00441152	Down
lnc-MSTRG.1701.2	0.713333	0.0266667	-4.74147	0.000598288	0.00446179	Down
lnc-MSTRG.24119.1	0.163333	1.91	3.54768	0.000618979	0.00460694	Up
lnc-MSTRG.11983.1	1.7	0.03	-5.82443	0.000620189	0.00460694	Down
lnc-MSTRG.6959.1	1.39	4.34333	1.64372	0.000622641	0.00461609	Up
lnc-MSTRG.4369.1	0.926667	0.04	-4.53398	0.000624701	0.0046223	Down
lnc-MSTRG.30135.1	0.283333	0.001	-8.14636	0.000635088	0.00468893	Down
lnc-MSTRG.1025.1	2.94	7.09667	1.27133	0.000636824	0.00468893	Up
lnc-MSTRG.26475.1	4.77333	0.176667	-4.7559	0.000637427	0.00468893	Down
lnc-MSTRG.2699.1	6.58667	1.81333	-1.8609	0.000655586	0.00481315	Down
lnc-MSTRG.14761.1	1.71	0.0666667	-4.68089	0.000666356	0.00488274	Down
lnc-MSTRG.24695.1	0.61	0.001	-9.25267	0.000691665	0.00505838	Down
lnc-MSTRG.23626.1	3.34667	0.303333	-3.46375	0.000694739	0.00506547	Down
lnc-MSTRG.2745.2	0.123333	1.44	3.54543	0.000695313	0.00506547	Up
lnc-MSTRG.31616.1	0.236667	1.11333	2.23396	0.000714575	0.00519579	Up
lnc-MSTRG.8632.1	0.753333	0.01	-6.23522	0.000716276	0.00519816	Down
lnc-MSTRG.16231.1	0.001	1.39	10.4409	0.000720796	0.00522094	Up
lnc-MSTRG.4274.1	0.001	1.15333	10.1716	0.000735981	0.00532073	Up
lnc-MSTRG.30128.1	2.51333	0.176667	-3.8305	0.000739192	0.00533375	Down
lnc-MSTRG.11163.2	8.66333	1.16667	-2.89253	0.00075265	0.00542052	Down
lnc-MSTRG.10308.1	3.13	0.633333	-2.30513	0.000759686	0.00546078	Down
lnc-MSTRG.26557.2	0.426667	0.001	-8.73697	0.000766491	0.00549924	Down
lnc-MSTRG.33734.1	0.0166667	0.786667	5.56071	0.000774393	0.00554542	Up
lnc-MSTRG.29747.1	2.76	0.866667	-1.67112	0.000805861	0.00575985	Down
lnc-MSTRG.7592.1	0.0133333	0.826667	5.9542	0.000812473	0.00578735	Up
lnc-MSTRG.9140.2	0.63	0.001	-9.29921	0.000812771	0.00578735	Down
lnc-MSTRG.27691.1	4.39333	13.2533	1.59297	0.000819422	0.00581578	Up
lnc-MSTRG.3358.1	0.186667	1.35667	2.86153	0.000820335	0.00581578	Up
lnc-MSTRG.16549.1	4.36	0.873333	-2.31972	0.000821377	0.00581578	Down
lnc-MSTRG.24988.4	1.28333	0.21	-2.61143	0.000828289	0.00585126	Down
lnc-MSTRG.20574.2	1.7	0.25	-2.76553	0.000829483	0.00585126	Down
lnc-MSTRG.25819.1	0.0166667	0.8	5.58496	0.000847826	0.00596951	Up
lnc-MSTRG.33722.1	0.0966667	1.54	3.99377	0.00087211	0.00612909	Up
lnc-MSTRG.32442.2	0.256667	8.79667	5.09899	0.000902472	0.0063307	Up
lnc-MSTRG.5548.2	0.001	1.00333	9.97059	0.000907633	0.00635511	Up
lnc-MSTRG.3477.1	0.34	2.76333	3.0228	0.00091027	0.00636179	Up
lnc-MSTRG.11402.2	1.23	0.253333	-2.27955	0.000916382	0.0063927	Down
lnc-MSTRG.28049.1	0.08	1.37667	4.10504	0.000920032	0.00640634	Up
lnc-MSTRG.32235.1	4.89	11.0167	1.17178	0.000924935	0.00641961	Up
lnc-MSTRG.31944.2	0.133333	1.23667	3.21335	0.000925334	0.00641961	Up
lnc-MSTRG.16340.1	0.0666667	1.01333	3.926	0.000940494	0.00651283	Up
lnc-MSTRG.118.2	5.73667	1.99	-1.52744	0.000946367	0.00654152	Down
lnc-MSTRG.12803.1	19.7833	0.0533333	-8.53503	0.000969446	0.00668165	Down
lnc-MSTRG.20625.1	1.41	0.001	-10.4615	0.000971039	0.00668165	Down
lnc-MSTRG.768.1	0.976667	0.001	-9.93172	0.000971941	0.00668165	Down
lnc-MSTRG.16203.1	0.0566667	1.46333	4.69061	0.000976421	0.00670027	Up
lnc-MSTRG.16207.1	2.74333	0.823333	-1.73638	0.000980787	0.00671804	Down
lnc-MSTRG.6630.1	0.0633333	1.24667	4.29897	0.000991325	0.0067721	Up
lnc-MSTRG.19768.1	0.62	2.51667	2.02117	0.000992887	0.0067721	Up
lnc-MSTRG.31690.1	0.001	2.51	11.2935	0.000994054	0.0067721	Up
lnc-MSTRG.33869.1	1.77	0.193333	-3.19459	0.00100372	0.00681475	Down
lnc-MSTRG.28651.1	8.56333	2.05	-2.06255	0.00100392	0.00681475	Down
lnc-MSTRG.30460.2	2.27333	8.19	1.84905	0.00102732	0.00696113	Up
lnc-MSTRG.20998.1	0.001	1.56333	10.6104	0.00102987	0.0069659	Up
lnc-MSTRG.21771.1	1.65	0.386667	-2.0933	0.00104417	0.00705	Down
lnc-MSTRG.22341.1	0.463333	0.001	-8.85591	0.00107137	0.00722078	Down
lnc-MSTRG.4049.1	3.70333	0.26	-3.83224	0.00108047	0.00726914	Down
lnc-MSTRG.11509.1	0.78	0.001	-9.60733	0.00109337	0.00734284	Down
lnc-MSTRG.28342.4	0.47	3.24	2.78526	0.00110746	0.00742431	Up
lnc-MSTRG.8396.1	0.001	0.363333	8.50515	0.00112213	0.00750936	Up
lnc-MSTRG.8364.1	0.663333	2.28	1.78123	0.00112453	0.00751208	Up
lnc-MSTRG.4886.2	1.15333	0.0533333	-4.43463	0.00112877	0.00752714	Down
lnc-MSTRG.5131.1	0.233333	1.48	2.66513	0.00113237	0.0075378	Up
lnc-MSTRG.7063.1	1.71667	0.06	-4.8385	0.00114687	0.00762058	Down
lnc-MSTRG.31856.1	1.45667	0.28	-2.37917	0.00114883	0.00762058	Down
lnc-MSTRG.7385.2	8	2.96	-1.4344	0.00115211	0.00762895	Down
lnc-MSTRG.2770.1	1.22	0.0233333	-5.70834	0.00117672	0.00777827	Down
lnc-MSTRG.31907.1	1.05667	0.116667	-3.17906	0.00118297	0.00780595	Down
lnc-MSTRG.28720.1	4.64	11.9867	1.36923	0.00118777	0.00782397	Up
lnc-MSTRG.17935.1	2.31333	0.0666667	-5.11686	0.0011931	0.00784543	Down
lnc-MSTRG.29930.1	0.296667	2.02667	2.77219	0.00119564	0.00784849	Up
lnc-MSTRG.20579.1	0.773333	0.001	-9.59495	0.00120235	0.00785882	Down
lnc-MSTRG.29288.1	0.001	0.736667	9.52487	0.00120302	0.00785882	Up
lnc-MSTRG.8364.2	0.593333	1.82667	1.6223	0.00120345	0.00785882	Up
lnc-MSTRG.11045.1	0.03	1.47	5.61471	0.00121153	0.00789794	Up
lnc-MSTRG.20655.1	1.29	0.06	-4.42626	0.00124025	0.00807125	Down
lnc-MSTRG.32793.1	1.20667	0.0366667	-5.04041	0.00124633	0.00809632	Down
lnc-MSTRG.11417.1	0.373333	1.65333	2.14684	0.00124839	0.00809632	Up
lnc-MSTRG.24913.3	1.22667	7.92	2.69076	0.00125853	0.00814809	Up
lnc-MSTRG.16366.2	0.0766667	1.50667	4.29662	0.00130307	0.00842208	Up
lnc-MSTRG.24186.2	3.43667	0.31	-3.47067	0.0013089	0.00844533	Down
lnc-MSTRG.13294.1	0.0733333	0.67	3.19162	0.00131174	0.0084492	Up
lnc-MSTRG.26152.3	6.08333	0.353333	-4.10576	0.00133763	0.00860132	Down
lnc-MSTRG.12248.1	1.32	4.98333	1.91657	0.00135414	0.0086927	Up
lnc-MSTRG.30345.1	0.903333	0.0366667	-4.62272	0.00135796	0.00870248	Down
lnc-MSTRG.24968.1	0.07	0.933333	3.73697	0.00136241	0.00871618	Up
lnc-MSTRG.18591.1	1.30333	0.03	-5.4411	0.001376	0.00878825	Down
lnc-MSTRG.28653.1	0.56	2.4	2.09954	0.00138756	0.00884713	Up
lnc-MSTRG.24124.1	1.61333	0.316667	-2.34901	0.00139926	0.00890033	Down
lnc-MSTRG.23056.1	0.943333	0.0933333	-3.3373	0.00140061	0.00890033	Down
lnc-MSTRG.30054.1	0.696667	0.0433333	-4.00692	0.00144022	0.00913671	Down
lnc-MSTRG.22520.1	0.0533333	1.44667	4.76155	0.00147465	0.00933946	Up
lnc-MSTRG.30436.1	0.726667	2.78667	1.93917	0.00150843	0.0095374	Up
lnc-MSTRG.6164.1	0.001	0.986667	9.94642	0.00151544	0.00955776	Up
lnc-MSTRG.12666.1	1.34333	0.001	-10.3916	0.0015167	0.00955776	Down
lnc-MSTRG.19608.1	0.28	3.34667	3.57923	0.00154308	0.00970781	Up
lnc-MSTRG.16879.1	0.001	0.98	9.93664	0.00155445	0.00976311	Up
lnc-MSTRG.7052.1	2.86	1.05333	-1.44105	0.00156276	0.009795	Down
lnc-MSTRG.17023.1	0.001	1.78667	10.8031	0.00156471	0.009795	Up
lnc-MSTRG.4110.1	0.03	1.08	5.16993	0.00156813	0.00980016	Up
lnc-MSTRG.18733.1	0.863333	0.1	-3.10992	0.00157327	0.00981608	Down
lnc-MSTRG.1171.1	0.663333	0.0233333	-4.82927	0.00159173	0.00991488	Down
lnc-MSTRG.33730.1	0.23	1.43	2.63631	0.00160881	0.0100048	Up
lnc-MSTRG.13406.2	6.28333	1.47333	-2.09245	0.001618	0.0100454	Down
lnc-MSTRG.28125.1	44.4833	13.1567	-1.75747	0.00162283	0.0100589	Down
lnc-MSTRG.3460.2	1.24	0.0833333	-3.8953	0.00163035	0.010089	Down
lnc-MSTRG.16852.1	1.24333	4.00333	1.68699	0.00163598	0.0100967	Up
lnc-MSTRG.16221.1	2.11	0.673333	-1.64785	0.00163694	0.0100967	Down
lnc-MSTRG.2814.1	1.86	0.13	-3.83872	0.00164889	0.0101538	Down
lnc-MSTRG.22022.1	0.001	1.24667	10.2839	0.00165165	0.0101543	Up
lnc-MSTRG.5535.1	0.66	0.001	-9.36632	0.00165681	0.0101695	Down
lnc-MSTRG.6589.1	0.13	1.57	3.59418	0.00168037	0.0102934	Up
lnc-MSTRG.29028.4	0.55	6.33667	3.52622	0.00168244	0.0102934	Up
lnc-MSTRG.19430.1	0.536667	0.02	-4.74595	0.0017196	0.0105037	Down
lnc-MSTRG.1727.1	0.0133333	0.56	5.39232	0.00175413	0.0106974	Up
lnc-MSTRG.2859.1	1.66	0.55	-1.59368	0.00176443	0.0107429	Down
lnc-MSTRG.23433.3	1.27667	0.0666667	-4.25927	0.00182993	0.0111237	Down
lnc-MSTRG.3462.3	3.02667	0.38	-2.99366	0.0018503	0.0112295	Down
lnc-MSTRG.27838.1	0.776667	0.001	-9.60115	0.0018584	0.0112606	Down
lnc-MSTRG.9791.1	1.12333	0.001	-10.1336	0.00187566	0.0113215	Down
lnc-MSTRG.32562.1	0.001	1.07	10.0634	0.00187732	0.0113215	Up
lnc-MSTRG.31638.1	2.41667	0.22	-3.45744	0.00187743	0.0113215	Down
lnc-MSTRG.6553.1	6.93333	1.58	-2.13362	0.00188275	0.0113289	Down
lnc-MSTRG.23376.1	3.33667	0.66	-2.33787	0.00188466	0.0113289	Down
lnc-MSTRG.29989.1	3.59	10.2433	1.51263	0.00191566	0.011497	Up
lnc-MSTRG.28321.1	1.27333	0.0933333	-3.77007	0.0019692	0.0117973	Down
lnc-MSTRG.30269.1	3.43	0.0466667	-6.19967	0.00197194	0.0117973	Down
lnc-MSTRG.3609.2	0.001	0.716667	9.48516	0.00197698	0.0118088	Up
lnc-MSTRG.11940.1	0.0533333	1.02333	4.26209	0.00200981	0.0119859	Up
lnc-MSTRG.7208.3	3.01333	1.01667	-1.56751	0.0020209	0.0120331	Down
lnc-MSTRG.16656.1	0.001	0.753333	9.55714	0.00204171	0.0121379	Up
lnc-MSTRG.21339.3	2.00667	0.156667	-3.67903	0.00207192	0.0122773	Down
lnc-MSTRG.30349.1	1.16	0.21	-2.46566	0.00207291	0.0122773	Down
lnc-MSTRG.20351.2	0.0966667	0.833333	3.1078	0.0020749	0.0122773	Up
lnc-MSTRG.32013.1	32.9367	11.2567	-1.54891	0.00208195	0.0122998	Down
lnc-MSTRG.31787.1	16.3767	5.22333	-1.6486	0.00212209	0.0125173	Down
lnc-MSTRG.3152.3	4.12667	10.2033	1.30599	0.00215043	0.0126648	Up
lnc-MSTRG.21828.2	1.60667	3.62	1.17192	0.00216132	0.0127091	Up
lnc-MSTRG.6709.1	0.15	1.04333	2.79817	0.00217463	0.0127675	Up
lnc-MSTRG.14074.1	1.11667	0.06	-4.21809	0.00218282	0.0127957	Down
lnc-MSTRG.25118.1	0.786667	0.001	-9.61961	0.00218821	0.0127987	Down
lnc-MSTRG.18151.1	1.66333	0.156667	-3.40831	0.0021901	0.0127987	Down
lnc-MSTRG.25795.1	16.5467	48.1733	1.54169	0.00221509	0.0129248	Up
lnc-MSTRG.2638.1	0.001	1.76333	10.7841	0.00224055	0.0130532	Up
lnc-MSTRG.7927.1	0.001	1.03	10.0084	0.00228908	0.0133154	Up
lnc-MSTRG.10964.1	0.126667	0.996667	2.97607	0.0023004	0.0133607	Up
lnc-MSTRG.7047.4	1.36333	3.47333	1.34918	0.00233816	0.0135592	Up
lnc-MSTRG.26820.1	1.61333	0.0366667	-5.45943	0.00236184	0.0136755	Down
lnc-MSTRG.13774.1	0.503333	0.001	-8.97537	0.00238351	0.0137724	Down
lnc-MSTRG.28110.1	1.76667	0.176667	-3.32193	0.00239255	0.0137724	Down
lnc-MSTRG.26064.1	6.49667	29.1733	2.16688	0.0023926	0.0137724	Up
lnc-MSTRG.33696.1	0.223333	1.85	3.05025	0.00239314	0.0137724	Up
lnc-MSTRG.5500.1	0.973333	0.12	-3.0199	0.0024026	0.0137874	Down
lnc-MSTRG.16083.1	0.65	0.0233333	-4.79998	0.00240305	0.0137874	Down
lnc-MSTRG.19298.1	0.533333	2.43	2.18785	0.00241414	0.0138301	Up
lnc-MSTRG.29907.1	0.00666667	0.63	6.56224	0.00242436	0.0138676	Up
lnc-MSTRG.22515.1	2.25667	0.776667	-1.53883	0.00243098	0.0138845	Down
lnc-MSTRG.7881.1	28.8033	7.90333	-1.8657	0.00245868	0.0140215	Down
lnc-MSTRG.12673.1	0.416667	1.52	1.86711	0.00247627	0.0141006	Up
lnc-MSTRG.3018.1	1.21	0.0266667	-5.50383	0.00249038	0.0141596	Down
lnc-MSTRG.33510.1	0.001	0.77	9.58871	0.00254145	0.0144283	Up
lnc-MSTRG.7029.1	0.103333	1.28667	3.63826	0.00257175	0.0145784	Up
lnc-MSTRG.9164.1	1.24333	0.001	-10.28	0.00258251	0.0146175	Down
lnc-MSTRG.14161.1	0.696667	0.0266667	-4.70736	0.00260875	0.0147439	Down
lnc-MSTRG.170.1	1.19333	0.001	-10.2208	0.00264253	0.0149085	Down
lnc-MSTRG.17569.3	0.393333	0.001	-8.61961	0.00264575	0.0149085	Down
lnc-MSTRG.16262.1	0.196667	1.49667	2.92793	0.00268032	0.0150737	Up
lnc-MSTRG.8809.1	0.0366667	1.41667	5.27189	0.00268305	0.0150737	Up
lnc-MSTRG.28598.1	1.57333	0.216667	-2.86028	0.00270259	0.015161	Down
lnc-MSTRG.28304.1	0.97	0.0666667	-3.86295	0.00278656	0.015607	Down
lnc-MSTRG.8012.1	0.723333	0.001	-9.49852	0.00279035	0.015607	Down
lnc-MSTRG.19667.2	0.946667	0.146667	-2.69032	0.00281413	0.0157167	Down
lnc-MSTRG.29028.3	0.793333	3.26333	2.04035	0.00284618	0.0158592	Up
lnc-MSTRG.6000.1	0.0466667	0.996667	4.41665	0.00285124	0.0158592	Up
lnc-MSTRG.10246.1	0.313333	0.00666667	-5.55459	0.00285223	0.0158592	Down
lnc-MSTRG.9404.1	6.08	0.636667	-3.25546	0.00286491	0.0159064	Down
lnc-MSTRG.19485.1	0.02	0.796667	5.3159	0.00293844	0.0162907	Up
lnc-MSTRG.17433.1	0.956667	3.24	1.75991	0.00294349	0.0162948	Up
lnc-MSTRG.6817.1	0.001	0.94	9.87652	0.00301105	0.0166211	Up
lnc-MSTRG.30971.1	0.506667	0.001	-8.98489	0.00301123	0.0166211	Down
lnc-MSTRG.12672.1	0.27	1.81	2.74496	0.00305276	0.0168258	Up
lnc-MSTRG.20632.1	2.41333	0.001	-11.2368	0.00308476	0.0169774	Down
lnc-MSTRG.23584.1	0.0333333	1.07667	5.01346	0.00311584	0.0171072	Up
lnc-MSTRG.9071.4	0.203333	1.42333	2.80735	0.00311873	0.0171072	Up
lnc-MSTRG.18562.3	0.001	0.6	9.22882	0.00312191	0.0171072	Up
lnc-MSTRG.10211.1	0.0166667	0.733333	5.45943	0.00316183	0.0172919	Up
lnc-MSTRG.18128.1	7.01333	1.85333	-1.91998	0.00316477	0.0172919	Down
lnc-MSTRG.14161.4	0.796667	0.0733333	-3.44144	0.00317715	0.0173345	Down
lnc-MSTRG.7890.1	0.99	0.09	-3.45943	0.00320413	0.0174565	Down
lnc-MSTRG.18799.1	0.001	0.983333	9.94154	0.00322533	0.0175467	Up
lnc-MSTRG.431.1	1.26667	0.001	-10.3068	0.00323777	0.0175891	Down
lnc-MSTRG.3948.1	0.253333	1.40667	2.47317	0.00330031	0.0179031	Up
lnc-MSTRG.4008.1	0.001	0.94	9.87652	0.00331647	0.0179637	Up
lnc-MSTRG.6622.1	0.0266667	0.963333	5.17493	0.00332098	0.0179637	Up
lnc-MSTRG.11310.1	0.001	0.89	9.79766	0.00335127	0.0181017	Up
lnc-MSTRG.29028.2	2.68	8.15	1.60457	0.00336397	0.0181443	Up
lnc-MSTRG.4886.1	1.36333	0.09	-3.92107	0.0034044	0.0183362	Down
lnc-MSTRG.20356.1	1.25667	0.0566667	-4.47096	0.00343893	0.0184959	Down
lnc-MSTRG.20470.1	0.416667	0.001	-8.70275	0.0035775	0.0192138	Down
lnc-MSTRG.9729.1	0.596667	0.001	-9.22078	0.00359814	0.0192973	Down
lnc-MSTRG.4845.1	0.206667	1.08	2.38565	0.00370478	0.019841	Up
lnc-MSTRG.6961.1	1.27667	0.143333	-3.15494	0.00371518	0.0198573	Down
lnc-MSTRG.7824.1	0.001	0.606667	9.24476	0.00371833	0.0198573	Up
lnc-MSTRG.2841.1	1.98	4.46667	1.1737	0.003823	0.0203875	Up
lnc-MSTRG.23733.1	0.963333	3.58667	1.89654	0.0038539	0.0205234	Up
lnc-MSTRG.28269.1	1.13	0.0466667	-4.59779	0.00393865	0.0209225	Down
lnc-MSTRG.23620.1	0.546667	0.0133333	-5.35755	0.00393992	0.0209225	Down
lnc-MSTRG.15767.1	0.446667	0.001	-8.80305	0.00395102	0.020952	Down
lnc-MSTRG.10011.1	0.02	0.846667	5.40372	0.00396168	0.0209792	Up
lnc-MSTRG.1213.1	0.001	1.49	10.5411	0.00404433	0.021378	Up
lnc-MSTRG.26397.2	1.99	4.51	1.18036	0.00404831	0.021378	Up
lnc-MSTRG.5657.1	0.846667	0.001	-9.72565	0.00406203	0.0214206	Down
lnc-MSTRG.552.1	0.0233333	1.07	5.51907	0.00408747	0.0215247	Up
lnc-MSTRG.9135.1	3.83667	0.476667	-3.0088	0.00409796	0.021525	Down
lnc-MSTRG.20898.2	0.001	0.736667	9.52487	0.00409891	0.021525	Up
lnc-MSTRG.23943.1	0.13	1.40333	3.43227	0.00412639	0.0216392	Up
lnc-MSTRG.32036.1	3.04667	7.28	1.25671	0.00413514	0.0216551	Up
lnc-MSTRG.17133.1	0.726667	2.74333	1.91656	0.00415393	0.0217234	Up
lnc-MSTRG.25550.1	1.22667	0.05	-4.61667	0.0043424	0.0226776	Down
lnc-MSTRG.27029.2	0.996667	0.113333	-3.13654	0.00440997	0.0229987	Down
lnc-MSTRG.30597.1	0.02	0.753333	5.23522	0.0044691	0.023275	Up
lnc-MSTRG.2241.1	1.05667	0.001	-10.0453	0.00452658	0.023542	Down
lnc-MSTRG.8197.2	0.753333	0.166667	-2.17632	0.00457365	0.0237541	Down
lnc-MSTRG.12097.1	0.1	1.21667	3.60486	0.00466367	0.0241884	Up
lnc-MSTRG.21167.2	3.76333	1.13333	-1.73144	0.00468362	0.0242586	Down
lnc-MSTRG.26282.1	3.70333	0.88	-2.07325	0.00477996	0.0247237	Down
lnc-MSTRG.31158.1	16.0933	1.46	-3.46242	0.00480235	0.0248056	Down
lnc-MSTRG.17034.1	0.556667	0.001	-9.12067	0.00486458	0.0250927	Down
lnc-MSTRG.25656.1	2.79333	0.356667	-2.96934	0.00489091	0.0251942	Down
lnc-MSTRG.26756.1	1.15667	0.183333	-2.65743	0.00491252	0.0252711	Down
lnc-MSTRG.3923.1	0.846667	0.001	-9.72565	0.00492009	0.0252756	Down
lnc-MSTRG.22749.1	0.996667	0.03	-5.05408	0.00494728	0.0253808	Down
lnc-MSTRG.18988.3	1.11667	0.0666667	-4.06609	0.00502091	0.0256944	Down
lnc-MSTRG.30044.1	0.23	1.10333	2.26216	0.0050258	0.0256944	Up
lnc-MSTRG.5948.1	0.001	0.473333	8.88671	0.00502879	0.0256944	Up
lnc-MSTRG.16572.1	0.706667	0.0166667	-5.40599	0.00505931	0.0258154	Down
lnc-MSTRG.32790.1	9.61333	1.96667	-2.28928	0.00521729	0.0265857	Down
lnc-MSTRG.22020.1	0.001	0.56	9.12928	0.00523764	0.0266535	Up
lnc-MSTRG.29256.1	0.17	1.24333	2.87061	0.00525471	0.0267044	Up
lnc-MSTRG.1622.1	0.001	0.423333	8.72565	0.00530923	0.0269452	Up
lnc-MSTRG.6429.1	0.0766667	0.92	3.58496	0.00538103	0.0272499	Up
lnc-MSTRG.27149.2	0.663333	0.03	-4.4667	0.00538368	0.0272499	Down
lnc-MSTRG.34081.2	0.99	3.52333	1.83144	0.00540186	0.0273054	Up
lnc-MSTRG.17216.1	0.216667	1.07	2.30406	0.00545145	0.0275193	Up
lnc-MSTRG.32152.1	3.14	0.38	-3.04669	0.00548871	0.0276704	Down
lnc-MSTRG.26708.1	3.08	0.826667	-1.89755	0.00552113	0.0277968	Down
lnc-MSTRG.22913.1	0.593333	1.70667	1.52427	0.0055974	0.0281433	Up
lnc-MSTRG.32340.1	2.21333	0.726667	-1.60686	0.00564753	0.0283576	Down
lnc-MSTRG.1274.1	0.596667	2.76333	2.21141	0.0056631	0.0283981	Up
lnc-MSTRG.26281.1	3.36333	0.926667	-1.85977	0.00569444	0.0285175	Down
lnc-MSTRG.14849.1	0.546667	0.0533333	-3.35755	0.00582029	0.0291091	Down
lnc-MSTRG.24844.1	0.453333	1.60667	1.82543	0.00597808	0.0298588	Up
lnc-MSTRG.27427.1	0.383333	0.001	-8.58246	0.0060936	0.0303957	Down
lnc-MSTRG.29290.1	0.001	0.716667	9.48516	0.00619924	0.0307971	Up
lnc-MSTRG.28722.2	0.653333	0.07	-3.22239	0.00619994	0.0307971	Down
lnc-MSTRG.17750.3	1.35333	0.343333	-1.97884	0.00620085	0.0307971	Down
lnc-MSTRG.12381.2	1.96667	0.316667	-2.63472	0.00620667	0.0307971	Down
lnc-MSTRG.17917.1	0.001	0.593333	9.2127	0.00632951	0.0313655	Up
lnc-MSTRG.29505.1	0.001	1.06	10.0498	0.00636086	0.0314597	Up
lnc-MSTRG.24188.1	0.92	0.04	-4.52356	0.00636597	0.0314597	Down
lnc-MSTRG.29130.1	1.08667	0.213333	-2.34873	0.00637348	0.0314597	Down
lnc-MSTRG.9530.1	0.001	0.686667	9.42347	0.00642468	0.0316711	Up
lnc-MSTRG.6215.1	0.001	1.51	10.5603	0.00650013	0.0320013	Up
lnc-MSTRG.32084.1	2.02667	6.83	1.75278	0.00654376	0.0321742	Up
lnc-MSTRG.15383.1	0.001	0.72	9.49185	0.00655949	0.0322097	Up
lnc-MSTRG.26629.1	1.68333	0.23	-2.87162	0.00657728	0.0322551	Down
lnc-MSTRG.24523.1	1.27	0.0533333	-4.57365	0.00659495	0.0322999	Down
lnc-MSTRG.26441.1	0.876667	0.05	-4.13203	0.00663376	0.0324479	Down
lnc-MSTRG.11113.1	0.001	0.77	9.58871	0.00668873	0.0326746	Up
lnc-MSTRG.11066.1	4.21	0.93	-2.17852	0.0067144	0.0327268	Down
lnc-MSTRG.9368.2	2.21667	4.81	1.11765	0.00671674	0.0327268	Up
lnc-MSTRG.13792.1	1.2	0.0266667	-5.49185	0.00678553	0.0330162	Down
lnc-MSTRG.32702.1	0.07	1.2	4.09954	0.00679359	0.0330162	Up
lnc-MSTRG.13295.1	0.216667	2.08	3.26303	0.00681328	0.0330693	Up
lnc-MSTRG.26542.1	0.001	0.596667	9.22078	0.00683851	0.0331492	Up
lnc-MSTRG.31410.2	1.33667	0.001	-10.3844	0.00688808	0.0333468	Down
lnc-MSTRG.630.2	102.543	216.557	1.07851	0.0069512	0.0336093	Up
lnc-MSTRG.19812.1	1.27	0.123333	-3.36419	0.00702517	0.0338764	Down
lnc-MSTRG.29909.1	0.001	1.02	9.99435	0.007026	0.0338764	Up
lnc-MSTRG.23362.1	1.52667	0.09	-4.08432	0.00703331	0.0338764	Down
lnc-MSTRG.6468.1	0.0266667	0.883333	5.04985	0.00708418	0.034078	Up
lnc-MSTRG.34083.1	0.0466667	1.26	4.75489	0.00711035	0.0341604	Up
lnc-MSTRG.13941.1	0.0333333	0.836667	4.64962	0.00713694	0.0342447	Up
lnc-MSTRG.2900.1	0.156667	1.67333	3.41695	0.00722581	0.0346271	Up
lnc-MSTRG.14548.1	0.126667	0.696667	2.45943	0.0074353	0.0355859	Up
lnc-MSTRG.31279.1	1.57333	0.143333	-3.45638	0.0074534	0.0355962	Down
lnc-MSTRG.6381.4	38.9933	16.0967	-1.27647	0.00745627	0.0355962	Down
lnc-MSTRG.19819.2	1.44	0.0466667	-4.94753	0.00750411	0.0357794	Down
lnc-MSTRG.6870.1	1.06	0.0433333	-4.61244	0.00755916	0.0359712	Down
lnc-MSTRG.18844.1	0.001	0.8	9.64386	0.00756337	0.0359712	Up
lnc-MSTRG.19525.2	0.001	0.606667	9.24476	0.00772583	0.0366977	Up
lnc-MSTRG.27330.1	0.416667	1.53333	1.87971	0.0077721	0.0368712	Up
lnc-MSTRG.4551.1	1.21667	0.156667	-2.95716	0.00790626	0.037453	Down
lnc-MSTRG.21239.3	3.71667	0.146667	-4.6634	0.00791456	0.037453	Down
lnc-MSTRG.4260.1	2.19333	0.776667	-1.49776	0.0080121	0.0378672	Down
lnc-MSTRG.31533.1	2.16667	0.09	-4.58941	0.00803254	0.0379164	Down
lnc-MSTRG.6936.1	2.53333	0.94	-1.4303	0.00807737	0.0380484	Down
lnc-MSTRG.29263.1	0.0866667	1.33333	3.94342	0.00808062	0.0380484	Up
lnc-MSTRG.1152.1	0.5	1.45	1.53605	0.00809485	0.0380679	Up
lnc-MSTRG.17866.1	2.96667	0.87	-1.76976	0.00812893	0.0381807	Down
lnc-MSTRG.14704.1	2.33	0.376667	-2.62897	0.00814456	0.0381967	Down
lnc-MSTRG.6746.1	0.383333	1.42667	1.89598	0.00816134	0.0381967	Up
lnc-MSTRG.32053.1	0.326667	1.12	1.77761	0.00816264	0.0381967	Up
lnc-MSTRG.29844.1	0.88	0.153333	-2.52083	0.00834851	0.0390182	Down
lnc-MSTRG.23171.2	1.58333	0.413333	-1.93759	0.00839399	0.0391823	Down
lnc-MSTRG.20620.1	0.14	0.903333	2.68983	0.00840741	0.0391966	Up
lnc-MSTRG.23198.1	2.36667	0.166667	-3.82782	0.00842036	0.0392086	Down
lnc-MSTRG.26801.1	1.9	0.523333	-1.8602	0.0084696	0.0393894	Down
lnc-MSTRG.3185.2	3.95667	0.956667	-2.0482	0.00856153	0.039768	Down
lnc-MSTRG.6381.2	20.8367	8.04	-1.37386	0.00858035	0.0398065	Down
lnc-MSTRG.21899.2	0.413333	0.001	-8.69116	0.00869181	0.0402742	Down
lnc-MSTRG.9134.1	1.36333	0.1	-3.76907	0.00880292	0.0407391	Down
lnc-MSTRG.16266.1	1.79	3.84333	1.1024	0.0088593	0.0409499	Up
lnc-MSTRG.184.1	1.50333	4.92	1.71049	0.00893212	0.0412361	Up
lnc-MSTRG.5278.1	0.163333	1.19	2.86507	0.00894858	0.0412617	Up
lnc-MSTRG.20898.1	0.001	0.62	9.27612	0.00900453	0.0414643	Up
lnc-MSTRG.4655.1	0.0666667	1.18667	4.15381	0.00901445	0.0414643	Up
lnc-MSTRG.6551.4	0.68	0.0466667	-3.86507	0.00905384	0.0415949	Down
lnc-MSTRG.5713.1	0.0533333	1.42333	4.73809	0.00912002	0.0418481	Up
lnc-MSTRG.6154.1	0.893333	0.0966667	-3.20811	0.00917844	0.042031	Down
lnc-MSTRG.26214.1	0.84	0.001	-9.71425	0.00918212	0.042031	Down
lnc-MSTRG.19484.1	0.453333	0.0366667	-3.62803	0.00921399	0.0421259	Down
lnc-MSTRG.29789.1	1.35667	0.166667	-3.02503	0.00929421	0.0423414	Down
lnc-MSTRG.25171.1	1.17	0.3	-1.96347	0.00933069	0.0423414	Down
lnc-MSTRG.17034.2	1.55333	0.143333	-3.43792	0.00933437	0.0423414	Down
lnc-MSTRG.13840.1	0.001	0.623333	9.28386	0.00933941	0.0423414	Up
lnc-MSTRG.10644.1	1.29	0.0466667	-4.78883	0.00935077	0.0423414	Down
lnc-MSTRG.617.2	1.17333	0.18	-2.70454	0.00935925	0.0423414	Down
lnc-MSTRG.32641.2	0.116667	1.49333	3.67807	0.0093632	0.0423414	Up
lnc-MSTRG.26239.5	0.36	1.61	2.16099	0.00936584	0.0423414	Up
lnc-MSTRG.33754.1	0.0533333	1.07	4.32643	0.00937718	0.0423414	Up
lnc-MSTRG.11964.1	3.26	0.866667	-1.91132	0.0093781	0.0423414	Down
lnc-MSTRG.315.1	0.163333	1	2.61411	0.00938432	0.0423414	Up
lnc-MSTRG.20234.1	0.17	1.78	3.38827	0.00944051	0.0425442	Up
lnc-MSTRG.24025.1	7.68333	12.75	0.730693	0.00945314	0.0425504	No
lnc-MSTRG.21197.1	2.55	6.36	1.31853	0.00951768	0.0427445	Up
lnc-MSTRG.5806.1	0.0333333	0.96	4.848	0.00951887	0.0427445	Up
lnc-MSTRG.19293.1	3.85333	0.513333	-2.90814	0.00956796	0.042914	Down
lnc-MSTRG.24116.1	1.6	0.273333	-2.54934	0.00971291	0.0434359	Down
lnc-MSTRG.2365.1	0.32	1.17	1.87036	0.0097149	0.0434359	Up
lnc-MSTRG.12896.1	0.173333	1.62667	3.2303	0.00971879	0.0434359	Up
lnc-MSTRG.6316.2	4.24667	1.91	-1.15276	0.00974352	0.0434471	Down
lnc-MSTRG.71.1	0.673333	0.001	-9.39518	0.0097478	0.0434471	Down
lnc-MSTRG.14541.1	0.001	0.506667	8.98489	0.00976615	0.0434471	Up
lnc-MSTRG.20988.1	0.001	1.31333	10.359	0.00976726	0.0434471	Up
lnc-MSTRG.16557.5	0.913333	2.08667	1.19199	0.00980917	0.0435701	Up
lnc-MSTRG.22078.1	1.20667	0.156667	-2.94526	0.00981797	0.0435701	Down
lnc-MSTRG.23844.1	4.45333	2.07333	-1.10293	0.00985338	0.0436426	Down
lnc-MSTRG.11523.1	2.50667	1.13	-1.14945	0.00985738	0.0436426	Down
lnc-MSTRG.8088.1	0.64	0.0466667	-3.77761	0.00987983	0.0436908	Down
lnc-MSTRG.32646.1	0.69	0.001	-9.43045	0.00989467	0.0437053	Down
lnc-MSTRG.14136.2	3.44333	6.33	0.8784	0.0101183	0.0446411	No
lnc-MSTRG.30285.1	1.02	5.60667	2.45857	0.010225	0.0450283	Up
lnc-MSTRG.25851.1	0.25	1.13	2.17632	0.01023	0.0450283	Up
lnc-MSTRG.6003.1	1.15	0.363333	-1.66227	0.0102418	0.0450283	Down
lnc-MSTRG.1254.1	0.996667	0.001	-9.96097	0.0102549	0.0450333	Down
lnc-MSTRG.25458.1	0.001	0.893333	9.80305	0.0103022	0.0451888	Up
lnc-MSTRG.10769.1	0.703333	0.04	-4.13614	0.0104075	0.0455977	Down
lnc-MSTRG.33813.1	2.65	0.75	-1.82103	0.0104206	0.0456023	Down
lnc-MSTRG.3787.1	0.001	0.326667	8.35168	0.0104652	0.0457369	Up
lnc-MSTRG.16787.1	0.43	0.00666667	-6.01123	0.0104756	0.0457369	Down
lnc-MSTRG.6814.3	0.0566667	0.66	3.54189	0.0105109	0.0458382	Up
lnc-MSTRG.22896.1	3.21333	1.07	-1.58646	0.0105626	0.0460106	Down
lnc-MSTRG.21640.2	0.001	0.636667	9.31439	0.0106728	0.0464373	Up
lnc-MSTRG.13788.2	1.25333	0.15	-3.06274	0.010849	0.0471496	Down
lnc-MSTRG.15594.1	3.54333	1.07667	-1.71854	0.0109173	0.0473917	Down
lnc-MSTRG.184.3	1.53667	3.33	1.11572	0.0109341	0.0474102	Up
lnc-MSTRG.12962.3	0.856667	2.14	1.3208	0.0110086	0.0476788	Up
lnc-MSTRG.21259.1	0.176667	3.65333	4.37011	0.0113651	0.0491664	Up
lnc-MSTRG.27264.1	1.05333	0.223333	-2.23769	0.0113846	0.0491945	Down
lnc-MSTRG.28808.1	1.10333	0.16	-2.78572	0.0114555	0.0494443	Down
lnc-MSTRG.29342.2	3.79	1.43333	-1.40282	0.011519	0.0496619	Down
lnc-MSTRG.13615.1	0.516667	0.0133333	-5.27612	0.0116179	0.0499661	Down
lnc-MSTRG.20993.3	4.09	1.16	-1.81798	0.0116214	0.0499661	Down
lnc-MSTRG.24593.2	0.48	2.02667	2.078	0.011636	0.0499661	Up
lnc-MSTRG.5739.1	0.116667	1.08667	3.21945	0.0116425	0.0499661	Up
lnc-MSTRG.28371.1	6.06333	1.55	-1.96784	0.0116589	0.0499725	Down
lnc-MSTRG.21519.1	2.06667	0.23	-3.1676	0.0116704	0.0499725	Down
lnc-MSTRG.16485.2	1.34	0.0333333	-5.32912	0.0117083	0.0500229	Down
lnc-MSTRG.32133.1	1.54333	0.216667	-2.8325	0.0117086	0.0500229	Down
lnc-MSTRG.10998.2	0.236667	0.001	-7.88671	0.011806	0.0503821	Down
lnc-MSTRG.11759.1	0.403333	1.67	2.0498	0.0119196	0.0507602	Up
lnc-MSTRG.15809.1	0.393333	0.0166667	-4.56071	0.0119241	0.0507602	Down
lnc-MSTRG.26615.1	1.18	2.42667	1.04019	0.0119478	0.0507602	Up
lnc-MSTRG.30208.1	0.783333	0.001	-9.61348	0.0119483	0.0507602	Down
lnc-MSTRG.28366.1	0.123333	0.746667	2.5979	0.0120451	0.0511141	Up
lnc-MSTRG.6584.2	5.60333	1.91333	-1.5502	0.0121911	0.0516756	Down
lnc-MSTRG.29467.3	3.92667	1.03	-1.93066	0.0122193	0.0517371	Down
lnc-MSTRG.17025.1	0.956667	0.136667	-2.80735	0.0122411	0.0517712	Down
lnc-MSTRG.20695.3	1.55333	0.283333	-2.4548	0.0122689	0.0518309	Down
lnc-MSTRG.13268.1	0.89	0.001	-9.79766	0.0123371	0.0520607	Down
lnc-MSTRG.22433.1	0.423333	0.001	-8.72565	0.0124127	0.0523214	Down
lnc-MSTRG.19143.1	21.8867	39.7167	0.859692	0.0125968	0.0530382	No
lnc-MSTRG.21338.1	1.11	0.283333	-1.96999	0.0126953	0.0533937	Down
lnc-MSTRG.15999.2	1.58	6.32333	2.00076	0.0127213	0.0534436	Up
lnc-MSTRG.30237.1	0.33	1.66333	2.33354	0.0127553	0.0535271	Up
lnc-MSTRG.4014.1	0.53	0.0166667	-4.99095	0.0127982	0.0536475	Down
lnc-MSTRG.16782.1	0.97	0.1	-3.27798	0.0128194	0.0536769	Down
lnc-MSTRG.17824.1	1.85333	0.226667	-3.03148	0.0130256	0.0544797	Down
lnc-MSTRG.646.3	0.001	2.85667	11.4801	0.0131401	0.054898	Up
lnc-MSTRG.30687.1	0.0433333	0.726667	4.06774	0.0131917	0.0550529	Up
lnc-MSTRG.7620.1	1.19667	0.3	-1.99599	0.0132763	0.0553448	Down
lnc-MSTRG.15601.1	2.53	0.68	-1.89553	0.0132968	0.0553691	Down
lnc-MSTRG.29911.1	0.001	0.72	9.49185	0.0134882	0.0561044	Up
lnc-MSTRG.5052.1	0.0666667	0.66	3.30743	0.0135201	0.0561753	Up
lnc-MSTRG.25672.1	1.08667	0.001	-10.0857	0.0135371	0.0561842	Down
lnc-MSTRG.7248.2	0.123333	1.45	3.55542	0.0136435	0.0565086	Up
lnc-MSTRG.9283.1	0.866667	0.0266667	-5.02237	0.0136452	0.0565086	Down
lnc-MSTRG.19984.1	0.253333	1.22333	2.27171	0.0137888	0.0570408	Up
lnc-MSTRG.4445.2	5.48333	9.54333	0.79944	0.0138075	0.057056	No
lnc-MSTRG.11673.1	0.64	2.03667	1.67007	0.0138299	0.0570861	Up
lnc-MSTRG.10157.2	0.001	0.793333	9.63178	0.0138481	0.0570988	Up
lnc-MSTRG.11688.2	0.24	1.21	2.3339	0.0141236	0.0581564	Up
lnc-MSTRG.21671.3	0.0566667	1.74667	4.94596	0.0141354	0.0581564	Up
lnc-MSTRG.14574.1	0.973333	2.15667	1.1478	0.014154	0.0581699	Up
lnc-MSTRG.19698.2	0.516667	0.0366667	-3.81669	0.0142105	0.058305	Down
lnc-MSTRG.26311.1	0.596667	1.99333	1.74019	0.0142177	0.058305	Up
lnc-MSTRG.13661.1	1.04667	0.001	-10.0316	0.0143036	0.0585304	Down
lnc-MSTRG.16051.1	4.19667	2.05333	-1.03128	0.0143036	0.0585304	Down
lnc-MSTRG.32256.2	7.53667	3.27667	-1.2017	0.0143798	0.0587782	Down
lnc-MSTRG.30247.1	0.44	1.88333	2.09771	0.0145162	0.0592719	Up
lnc-MSTRG.28536.2	0.0666667	1.24	4.21723	0.0145529	0.0593576	Up
lnc-MSTRG.30609.1	0.646667	0.13	-2.31451	0.0146523	0.0596988	Down
lnc-MSTRG.3866.1	0.156667	1.5	3.25919	0.0147673	0.0601022	Up
lnc-MSTRG.2386.1	0.373333	1.51333	2.01919	0.0148035	0.060185	Up
lnc-MSTRG.12664.5	0.166667	0.94	2.4957	0.0149417	0.0606818	Up
lnc-MSTRG.22209.2	0.516667	0.01	-5.69116	0.0150138	0.0609088	Down
lnc-MSTRG.23332.1	0.776667	0.0966667	-3.00621	0.0152155	0.0616611	Down
lnc-MSTRG.17709.1	1.05667	0.001	-10.0453	0.0152736	0.0618013	Down
lnc-MSTRG.23396.1	1.48	3.2	1.11247	0.0152828	0.0618013	Up
lnc-MSTRG.34226.1	347.883	139.22	-1.32124	0.0153206	0.0618879	Down
lnc-MSTRG.8727.1	0.001	0.793333	9.63178	0.0155235	0.0626408	Up
lnc-MSTRG.23985.1	2.05	0.613333	-1.74088	0.0155447	0.0626594	Down
lnc-MSTRG.18076.1	1.36333	0.186667	-2.8686	0.0155762	0.0627106	Down
lnc-MSTRG.31069.2	15.7533	8.40667	-0.906051	0.0156016	0.0627106	No
lnc-MSTRG.23076.1	0.883333	3.56	2.01085	0.0156072	0.0627106	Up
lnc-MSTRG.5356.3	1.82	0.543333	-1.74403	0.0156517	0.062823	Down
lnc-MSTRG.31790.1	6.92333	2.30333	-1.58774	0.0156848	0.0628455	Down
lnc-MSTRG.1788.1	53.2533	85.2233	0.678377	0.015692	0.0628455	No
lnc-MSTRG.212.1	0.686667	2.12333	1.62865	0.0157072	0.0628455	Up
lnc-MSTRG.8626.1	0.533333	0.0433333	-3.62149	0.0157958	0.0631332	Down
lnc-MSTRG.2643.1	1.22	2.99333	1.29487	0.0158283	0.0631961	Up
lnc-MSTRG.33254.1	0.813333	0.166667	-2.28688	0.0158909	0.063363	Down
lnc-MSTRG.10179.4	0.67	0.001	-9.38802	0.0159036	0.063363	Down
lnc-MSTRG.12664.4	1.47333	3.88333	1.39821	0.0159236	0.063376	Up
lnc-MSTRG.29477.1	0.676667	0.1	-2.75845	0.0160871	0.0638965	Down
lnc-MSTRG.14714.1	0.753333	0.001	-9.55714	0.0160882	0.0638965	Down
lnc-MSTRG.657.2	0.001	0.67	9.38802	0.0161873	0.0642226	Up
lnc-MSTRG.22770.2	0.03	0.756667	4.65662	0.0162184	0.0642787	Up
lnc-MSTRG.10916.2	7.77333	2.02	-1.94418	0.0165649	0.065583	Down
lnc-MSTRG.5659.1	0.31	0.001	-8.27612	0.0167014	0.0660542	Down
lnc-MSTRG.7787.1	1.32	0.413333	-1.67516	0.0167201	0.0660593	Down
lnc-MSTRG.8179.1	0.0566667	0.94	4.05209	0.0167541	0.0661245	Up
lnc-MSTRG.5708.1	9.17333	0.001	-13.1632	0.0168274	0.0663446	Down
lnc-MSTRG.6541.3	1.83667	0.61	-1.59021	0.0168869	0.0665096	Down
lnc-MSTRG.3481.1	1.5	0.216667	-2.79141	0.0169069	0.0665192	Down
lnc-MSTRG.25968.2	0.903333	0.1	-3.17526	0.0170274	0.0669238	Down
lnc-MSTRG.25923.3	2.96667	1.1	-1.43134	0.0172388	0.0676842	Down
lnc-MSTRG.5481.1	0.75	0.02	-5.22882	0.0173046	0.0678719	Down
lnc-MSTRG.25498.1	0.883333	0.001	-9.78681	0.0174333	0.0683061	Down
lnc-MSTRG.10335.1	0.986667	2.85333	1.53201	0.0174889	0.068414	Up
lnc-MSTRG.6754.1	0.001	0.243333	7.92679	0.0174991	0.068414	Up
lnc-MSTRG.22962.1	0.62	0.09	-2.78427	0.0175152	0.068414	Down
lnc-MSTRG.25908.2	8.87	16.11	0.86095	0.0175933	0.0686486	No
lnc-MSTRG.16781.1	0.373333	0.001	-8.54432	0.017617	0.0686699	Down
lnc-MSTRG.17425.3	2.07333	0.51	-2.02338	0.0176637	0.0687812	Down
lnc-MSTRG.20012.1	0.001	0.6	9.22882	0.0177043	0.0688683	Up
lnc-MSTRG.19.1	0.766667	2.34333	1.61189	0.0177581	0.0690064	Up
lnc-MSTRG.9679.2	11.03	3.92333	-1.49128	0.0180702	0.0701472	Down
lnc-MSTRG.9300.1	1.71333	0.576667	-1.571	0.0181922	0.0705485	Down
lnc-MSTRG.29941.1	0.0266667	1.15	5.43045	0.0182298	0.0706217	Up
lnc-MSTRG.2564.2	6.82	2.25333	-1.59771	0.0182487	0.0706225	Down
lnc-MSTRG.24407.1	6.89333	13.55	0.975019	0.0182741	0.0706486	No
lnc-MSTRG.15507.1	6.09	2.95333	-1.0441	0.0183343	0.0708088	Down
lnc-MSTRG.17677.1	8.76333	15.26	0.800203	0.0183694	0.0708722	No
lnc-MSTRG.18349.6	2.13333	0.666667	-1.67807	0.0186022	0.0716971	Down
lnc-MSTRG.25380.2	0.71	0.001	-9.47168	0.0188399	0.0725394	Down
lnc-MSTRG.3394.1	4.12667	2.05	-1.00935	0.0192075	0.0738795	Down
lnc-MSTRG.34419.1	0.0466667	1.92333	5.36507	0.0193718	0.0744359	Up
lnc-MSTRG.4950.1	0.28	0.01	-4.80735	0.0194273	0.0745731	Down
lnc-MSTRG.630.3	18.0533	52.8333	1.54918	0.0195118	0.0748217	Up
lnc-MSTRG.20949.2	0.526667	0.0733333	-2.84435	0.0196277	0.0751217	Down
lnc-MSTRG.16804.4	0.41	0.0166667	-4.62059	0.0196298	0.0751217	Down
lnc-MSTRG.29006.2	0.001	0.733333	9.51833	0.0196505	0.0751249	Up
lnc-MSTRG.2427.2	0.5	0.001	-8.96578	0.0197447	0.0754087	Down
lnc-MSTRG.32204.1	0.233333	0.883333	1.92057	0.0198584	0.0757666	Up
lnc-MSTRG.25515.1	1.69667	0.233333	-2.86224	0.0198984	0.0758425	Down
lnc-MSTRG.34508.1	7.79333	16.1433	1.05063	0.0201393	0.0766836	Up
lnc-MSTRG.15429.1	0.753333	0.04	-4.23522	0.0201844	0.0767779	Down
lnc-MSTRG.3917.1	0.001	1.12333	10.1336	0.0202221	0.0768439	Up
lnc-MSTRG.11605.1	0.693333	0.001	-9.43741	0.0202796	0.0769852	Down
lnc-MSTRG.10850.1	0.65	0.156667	-2.05274	0.020321	0.077065	Down
lnc-MSTRG.28347.3	0.44	1.52333	1.79166	0.020471	0.077556	Up
lnc-MSTRG.33971.1	1.16	0.0666667	-4.12102	0.0205676	0.0778438	Down
lnc-MSTRG.24927.1	9.98667	3.86333	-1.37016	0.0206241	0.0779349	Down
lnc-MSTRG.26251.1	1.98	0.213333	-3.21432	0.0206391	0.0779349	Down
lnc-MSTRG.14124.2	0.96	0.12	-3	0.0206535	0.0779349	Down
lnc-MSTRG.4936.1	0.723333	2.24667	1.63505	0.0206837	0.0779711	Up
lnc-MSTRG.9163.1	7.59333	11.8067	0.636796	0.0207503	0.078124	No
lnc-MSTRG.23521.1	0.353333	0.001	-8.46489	0.0207656	0.078124	Down
lnc-MSTRG.19203.1	0.293333	1.15333	1.9752	0.0208682	0.0784322	Up
lnc-MSTRG.6153.1	2.08	0.913333	-1.18737	0.0209629	0.0787098	Down
lnc-MSTRG.21736.2	0.293333	1.49	2.3447	0.0209998	0.0787702	Up
lnc-MSTRG.23292.1	0.35	0.02	-4.12928	0.0211616	0.0792981	Down
lnc-MSTRG.18813.3	0.03	0.713333	4.57154	0.0211991	0.0793291	Up
lnc-MSTRG.7751.2	1.04667	0.116667	-3.16534	0.0212118	0.0793291	Down
lnc-MSTRG.32256.9	0.84	3.96333	2.23825	0.0213111	0.0796218	Up
lnc-MSTRG.33853.2	1.63667	0.4	-2.03269	0.0213492	0.0796855	Down
lnc-MSTRG.6239.1	2.11333	1.05333	-1.00456	0.0214465	0.0799697	Down
lnc-MSTRG.27473.3	1.10333	2.62333	1.24953	0.0215331	0.0802136	Up
lnc-MSTRG.4702.1	1.02667	2.91333	1.5047	0.0215771	0.0802981	Up
lnc-MSTRG.30656.2	0.09	1.53	4.08746	0.0216003	0.0803057	Up
lnc-MSTRG.17514.1	1.49667	0.286667	-2.38431	0.0216817	0.0805289	Down
lnc-MSTRG.3451.1	0.603333	1.6	1.40704	0.0217462	0.0806893	Up
lnc-MSTRG.20149.1	4.38333	1.41333	-1.63293	0.0217723	0.0807069	Down
lnc-MSTRG.16018.1	2.91	6.24	1.10053	0.0219073	0.0811277	Up
lnc-MSTRG.14211.5	0.54	1.16	1.10309	0.0219416	0.0811754	Up
lnc-MSTRG.26266.3	0.683333	1.63	1.25421	0.0220391	0.0814564	Up
lnc-MSTRG.28108.1	0.666667	0.0533333	-3.64386	0.0220817	0.0815342	Down
lnc-MSTRG.20068.1	0.32	1.59	2.31288	0.0221259	0.0816177	Up
lnc-MSTRG.7635.1	0.6	2.47	2.04148	0.0221945	0.0817909	Up
lnc-MSTRG.10003.2	0.001	2.80667	11.4546	0.0222408	0.0818818	Up
lnc-MSTRG.4320.2	2.08333	0.386667	-2.42973	0.0227159	0.0835494	Down
lnc-MSTRG.34588.1	1.40667	5.09333	1.85633	0.0227934	0.0837532	Up
lnc-MSTRG.24053.1	0.443333	1	1.17354	0.0228325	0.0838152	Up
lnc-MSTRG.5078.1	3.87667	1.06	-1.87075	0.0230537	0.0845452	Down
lnc-MSTRG.11858.1	0.253333	1.44	2.50696	0.0230946	0.0846129	Up
lnc-MSTRG.5697.1	1.66	0.556667	-1.5763	0.0231725	0.0848164	Down
lnc-MSTRG.34593.1	51.6033	76.3733	0.565605	0.0233152	0.085256	No
lnc-MSTRG.34458.1	0.0466667	0.756667	4.01919	0.0233771	0.0853997	Up
lnc-MSTRG.28373.1	18.9267	8.13	-1.21909	0.023404	0.0854157	Down
lnc-MSTRG.25392.1	0.716667	0.001	-9.48516	0.023536	0.0858147	Down
lnc-MSTRG.24602.6	2.55333	0.001	-11.3182	0.023674	0.0862345	Down
lnc-MSTRG.29769.2	0.416667	1.59	1.93206	0.0238219	0.0866897	Up
lnc-MSTRG.18913.3	0.716667	1.96333	1.45393	0.0240533	0.0874476	Up
lnc-MSTRG.17691.1	1.77	0.59	-1.58496	0.0241337	0.0876555	Down
lnc-MSTRG.8088.2	1.39333	0.333333	-2.0635	0.0242774	0.0880867	Down
lnc-MSTRG.16397.1	4.23	1.02333	-2.04738	0.024299	0.0880867	Down
lnc-MSTRG.19969.1	1.44	0.666667	-1.11103	0.0243264	0.0881016	Down
lnc-MSTRG.25487.4	0.603333	1.94333	1.68751	0.0244356	0.0883946	Up
lnc-MSTRG.14616.1	0.001	1.17667	10.2005	0.024454	0.0883946	Up
lnc-MSTRG.23738.1	0.583333	0.001	-9.18818	0.0245156	0.0884791	Down
lnc-MSTRG.33861.2	1.55667	0.686667	-1.18078	0.0245242	0.0884791	Down
lnc-MSTRG.8125.3	2.85667	1.41667	-1.01183	0.0245527	0.0884975	Down
lnc-MSTRG.18464.1	0.543333	1.46	1.42606	0.0246014	0.0885885	Up
lnc-MSTRG.9851.1	11.1167	5.14	-1.11288	0.0247856	0.0891669	Down
lnc-MSTRG.28362.1	1.28333	0.243333	-2.39889	0.0248561	0.0893356	Down
lnc-MSTRG.2308.1	5.92333	3.07333	-0.946605	0.0249034	0.0894204	No
lnc-MSTRG.4057.1	0.001	0.743333	9.53787	0.0252095	0.0904338	Up
lnc-MSTRG.10803.2	1.33333	0.516667	-1.36773	0.0252478	0.0904852	Down
lnc-MSTRG.18395.1	0.001	1.34	10.388	0.025498	0.0912955	Up
lnc-MSTRG.29344.2	2.20667	0.21	-3.39341	0.025645	0.0917348	Down
lnc-MSTRG.12830.2	3.76667	1.04667	-1.84749	0.0257768	0.0921193	Down
lnc-MSTRG.28087.2	3.33	1.33333	-1.32048	0.025861	0.0922814	Down
lnc-MSTRG.6499.1	1.35667	0.346667	-1.96845	0.025871	0.0922814	Down
lnc-MSTRG.14.3	2.68333	29.59	3.46301	0.0259232	0.0923806	Up
lnc-MSTRG.14438.1	0.0833333	0.843333	3.33914	0.0261057	0.0929433	Up
lnc-MSTRG.27936.1	0.143333	0.976667	2.76849	0.0262615	0.0934099	Up
lnc-MSTRG.17959.1	5.19	2.8	-0.890308	0.0263601	0.0936726	No
lnc-MSTRG.13049.1	3.48	1.7	-1.03355	0.0265068	0.0940795	Down
lnc-MSTRG.21046.1	0.001	4.89333	12.2566	0.0265244	0.0940795	Up
lnc-MSTRG.32833.1	1.10333	0.216667	-2.34832	0.0267653	0.0947995	Down
lnc-MSTRG.29395.1	0.7	0.02	-5.12928	0.0267825	0.0947995	Down
lnc-MSTRG.34423.1	2.08667	4.21667	1.0149	0.0268026	0.0947995	Up
lnc-MSTRG.28888.2	2.01333	5.9	1.55113	0.0268981	0.0950484	Up
lnc-MSTRG.15820.1	0.716667	1.85667	1.37334	0.0270059	0.09534	Up
lnc-MSTRG.5710.1	0.0733333	0.923333	3.65431	0.0271948	0.0959175	Up
lnc-MSTRG.24683.1	4.28	0.646667	-2.72652	0.0272511	0.0960264	Down
lnc-MSTRG.13462.2	1.81	0.573333	-1.65854	0.027308	0.0961375	Down
lnc-MSTRG.23813.1	0.256667	0.001	-8.00375	0.0273555	0.0962149	Down
lnc-MSTRG.15533.1	6.30667	10.46	0.729933	0.0276344	0.0971055	No
lnc-MSTRG.10366.1	1.25333	3.20667	1.3553	0.0276788	0.0971402	Up
lnc-MSTRG.24699.1	2.33333	0.156667	-3.89662	0.0276956	0.0971402	Down
lnc-MSTRG.25218.1	0.873333	0.001	-9.77039	0.0277807	0.0973484	Down
lnc-MSTRG.6420.1	0.28	0.946667	1.75743	0.028138	0.0984352	Up
lnc-MSTRG.16650.1	0.486667	0.0166667	-4.8679	0.0281429	0.0984352	Down
lnc-MSTRG.29264.1	1.12667	0.253333	-2.15295	0.0282382	0.0986773	Down
lnc-MSTRG.23061.1	0.113333	1.51667	3.74226	0.0283078	0.0988289	Up
lnc-MSTRG.12197.1	0.646667	0.1	-2.69302	0.0285867	0.0997107	Down
lnc-MSTRG.4015.1	0.346667	0.0133333	-4.70044	0.028646	0.0997541	Down
lnc-MSTRG.29028.1	2.03667	0.88	-1.21063	0.0286519	0.0997541	Down
lnc-MSTRG.7023.1	2.32667	1.08667	-1.09836	0.0286894	0.0997903	Down
lnc-MSTRG.23628.1	5.52	0.526667	-3.38971	0.0287151	0.0997903	Down
lnc-MSTRG.2309.1	0.876667	0.286667	-1.61265	0.0288692	0.100234	Down
lnc-MSTRG.17574.1	1.07	0.001	-10.0634	0.0290621	0.100811	Down
lnc-MSTRG.7047.3	1.90667	4.80667	1.33398	0.0292341	0.101314	Up
lnc-MSTRG.15984.1	1.38667	0.126667	-3.45251	0.0292637	0.101324	Down
lnc-MSTRG.25913.1	2.93	0.001	-11.5167	0.0295437	0.1022	Down
lnc-MSTRG.24067.1	2.17333	0.876667	-1.30981	0.0296825	0.102497	Down
lnc-MSTRG.21367.2	3.02333	1.07333	-1.49404	0.0296838	0.102497	Down
lnc-MSTRG.34098.4	8.90667	4.83667	-0.880872	0.0297322	0.102533	No
lnc-MSTRG.27363.7	1.29667	0.193333	-2.74565	0.0297485	0.102533	Down
lnc-MSTRG.21604.1	0.11	0.876667	2.99452	0.029818	0.102679	Up
lnc-MSTRG.21297.1	0.001	0.94	9.87652	0.0299144	0.102918	Up
lnc-MSTRG.1628.1	0.183333	0.83	2.17864	0.030113	0.103507	Up
lnc-MSTRG.7235.2	1.89333	0.463333	-2.03081	0.0301958	0.103697	Down
lnc-MSTRG.21593.6	0.726667	0.216667	-1.74582	0.0303415	0.104103	Down
lnc-MSTRG.24444.3	1.95333	0.556667	-1.81105	0.0305015	0.104557	Down
lnc-MSTRG.20112.1	27.7433	13.4833	-1.04096	0.0305834	0.104723	Down
lnc-MSTRG.11292.1	1.54667	3.28	1.08453	0.0306288	0.104723	Up
lnc-MSTRG.9900.1	1.10333	2.67667	1.27857	0.030633	0.104723	Up
lnc-MSTRG.29275.1	2.56333	0.553333	-2.2118	0.0307578	0.105054	Down
lnc-MSTRG.15759.1	16.4933	25.95	0.653852	0.0308839	0.10539	No
lnc-MSTRG.25009.1	0.696667	0.0333333	-4.38543	0.0311769	0.106294	Down
lnc-MSTRG.1199.3	0.001	0.87	9.76487	0.0312537	0.10646	Up
lnc-MSTRG.28885.1	11.1633	3.83	-1.54335	0.0315458	0.107298	Down
lnc-MSTRG.30288.1	0.001	0.593333	9.2127	0.0315566	0.107298	Up
lnc-MSTRG.18996.1	0.226667	0.001	-7.82443	0.031869	0.108263	Down
lnc-MSTRG.33631.1	0.14	0.69	2.30117	0.0319364	0.108336	Up
lnc-MSTRG.2419.1	0.001	0.556667	9.12067	0.0319478	0.108336	Up
lnc-MSTRG.6002.1	2.24	0.293333	-2.93289	0.0320478	0.108518	Down
lnc-MSTRG.7242.1	55.7067	26.7533	-1.05813	0.0320827	0.108518	Down
lnc-MSTRG.13779.1	2.94333	0.82	-1.84376	0.0320877	0.108518	Down
lnc-MSTRG.3403.2	0.366667	2.16	2.55849	0.0321729	0.108619	Up
lnc-MSTRG.3817.1	0.763333	2.09667	1.45771	0.0322007	0.108619	Up
lnc-MSTRG.31825.3	0.973333	0.1	-3.28293	0.0322037	0.108619	Down
lnc-MSTRG.3903.1	4.22333	0.68	-2.63478	0.0322855	0.108781	Down
lnc-MSTRG.7033.1	0.44	0.001	-8.78136	0.0323092	0.108781	Down
lnc-MSTRG.30285.3	0.0233333	0.63	4.75489	0.0324711	0.109229	Up
lnc-MSTRG.9005.1	0.353333	0.001	-8.46489	0.0325962	0.109552	Down
lnc-MSTRG.565.1	2.83333	0.586667	-2.27189	0.0328172	0.110151	Down
lnc-MSTRG.10532.1	1.44333	0.476667	-1.59835	0.0328524	0.110151	Down
lnc-MSTRG.8944.1	0.153333	1.44667	3.23799	0.0328924	0.110151	Up
lnc-MSTRG.25265.2	0.001	0.74	9.53138	0.0329213	0.110151	Up
lnc-MSTRG.16742.1	1.25333	0.226667	-2.46713	0.032943	0.110151	Down
lnc-MSTRG.14836.1	2.71667	7.26333	1.41879	0.0329492	0.110151	Up
lnc-MSTRG.779.1	0.0133333	0.263333	4.30378	0.0331862	0.110845	Up
lnc-MSTRG.26230.1	0.473333	1.25333	1.40484	0.0332455	0.110884	Up
lnc-MSTRG.29715.1	0.001	0.666667	9.38082	0.0332564	0.110884	Up
lnc-MSTRG.15818.1	0.0233333	0.85	5.187	0.0336158	0.111984	Up
lnc-MSTRG.7859.1	0.64	0.0666667	-3.26303	0.0337498	0.112247	Down
lnc-MSTRG.22081.1	0.303333	1.13333	1.9016	0.0337543	0.112247	Up
lnc-MSTRG.18153.1	0.963333	0.116667	-3.04564	0.0339169	0.112689	Down
lnc-MSTRG.31408.1	1.89333	0.2	-3.24286	0.0339563	0.112721	Down
lnc-MSTRG.21090.2	0.893333	0.0766667	-3.54253	0.0340744	0.113013	Down
lnc-MSTRG.32778.1	0.116667	0.72	2.6256	0.0349937	0.115961	Up
lnc-MSTRG.13297.2	0.636667	0.04	-3.99247	0.0351864	0.116418	Down
lnc-MSTRG.3063.1	0.001	0.626667	9.29155	0.0351932	0.116418	Up
lnc-MSTRG.8630.1	1.13	0.153333	-2.88158	0.0353455	0.116819	Down
lnc-MSTRG.21023.2	1.59	0.703333	-1.17675	0.0355171	0.117284	Down
lnc-MSTRG.23561.1	1.31667	0.22	-2.58131	0.0356347	0.11757	Down
lnc-MSTRG.21240.1	2.57667	0.13	-4.30892	0.0360663	0.118793	Down
lnc-MSTRG.12361.1	0.526667	1.21667	1.20797	0.0360684	0.118793	Up
lnc-MSTRG.27752.2	2.21333	0.776667	-1.51085	0.0369184	0.121487	Down
lnc-MSTRG.34524.1	12.83	19.3867	0.595544	0.036977	0.121574	No
lnc-MSTRG.15999.3	1.03667	4.69	2.17764	0.0374366	0.122912	Up
lnc-MSTRG.25908.1	0.906667	1.88333	1.05464	0.0374489	0.122912	Up
lnc-MSTRG.28153.1	0.0833333	0.906667	3.44361	0.0374944	0.122954	Up
lnc-MSTRG.25690.1	1.3	0.576667	-1.1727	0.0375419	0.122989	Down
lnc-MSTRG.32831.3	1.30333	2.40667	0.88483	0.03757	0.122989	No
lnc-MSTRG.28876.1	0.76	0.03	-4.66297	0.0377443	0.123453	Down
lnc-MSTRG.15694.1	0.0666667	0.753333	3.49825	0.0378456	0.123677	Up
lnc-MSTRG.25022.1	2.88333	5.75333	0.99666	0.0379311	0.123849	No
lnc-MSTRG.29280.1	0.153333	1.31333	3.09849	0.0381139	0.124339	Up
lnc-MSTRG.27657.4	1.59667	0.84	-0.926602	0.0381961	0.1245	No
lnc-MSTRG.8615.1	0.001	0.56	9.12928	0.0382958	0.124717	Up
lnc-MSTRG.28679.1	5.88333	2.88333	-1.0289	0.0383314	0.124726	Down
lnc-MSTRG.21119.1	0.106667	0.803333	2.91289	0.038408	0.124828	Up
lnc-MSTRG.4020.4	0.001	0.506667	8.98489	0.038429	0.124828	Up
lnc-MSTRG.21779.1	0.18	0.846667	2.2338	0.0385924	0.125251	Up
lnc-MSTRG.21942.4	0.373333	1.1	1.55897	0.0389836	0.126412	Up
lnc-MSTRG.13106.1	0.09	0.566667	2.6545	0.0390766	0.126605	Up
lnc-MSTRG.7892.1	0.001	0.506667	8.98489	0.0391525	0.126743	Up
lnc-MSTRG.24347.1	2.70333	0.196667	-3.78092	0.0391967	0.126777	Down
lnc-MSTRG.33086.1	0.226667	0.001	-7.82443	0.0392554	0.126859	Down
lnc-MSTRG.10104.1	1.04333	0.103333	-3.33582	0.0395729	0.127775	Down
lnc-MSTRG.2578.1	0.59	0.001	-9.20457	0.0398886	0.128685	Down
lnc-MSTRG.29282.1	0.001	0.503333	8.97537	0.040014	0.128979	Up
lnc-MSTRG.20640.1	0.186667	0.876667	2.23156	0.0401862	0.129424	Up
lnc-MSTRG.11011.1	0.453333	0.953333	1.07241	0.0402376	0.129479	Up
lnc-MSTRG.18105.1	3.45333	1.87667	-0.879817	0.0402857	0.129494	No
lnc-MSTRG.34094.1	0.6	0.001	-9.22882	0.040311	0.129494	Down
lnc-MSTRG.3409.1	0.001	0.696667	9.44432	0.040345	0.129494	Up
lnc-MSTRG.3538.1	1.07	0.18	-2.57154	0.0406005	0.130204	Down
lnc-MSTRG.18015.1	2.04333	1.03	-0.98828	0.0406716	0.130297	No
lnc-MSTRG.29156.4	1.80333	0.001	-10.8165	0.0406984	0.130297	Down
lnc-MSTRG.646.1	7.31333	12.77	0.804158	0.0410651	0.13136	No
lnc-MSTRG.17871.1	0.24	0.001	-7.90689	0.0416349	0.13307	Down
lnc-MSTRG.2185.1	0.456667	0.06	-2.92811	0.0420152	0.134172	Down
lnc-MSTRG.3105.1	0.166667	0.85	2.3505	0.0421201	0.134393	Up
lnc-MSTRG.1096.5	0.35	1.36667	1.96523	0.0422891	0.134751	Up
lnc-MSTRG.15516.1	2.21667	4.53	1.03112	0.0423126	0.134751	Up
lnc-MSTRG.26189.1	2.60333	4.46333	0.777762	0.0423391	0.134751	No
lnc-MSTRG.2948.1	0.38	1.24333	1.71014	0.0426001	0.13536	Up
lnc-MSTRG.23826.1	3.45667	1.63	-1.08451	0.042602	0.13536	Down
lnc-MSTRG.21498.1	0.001	0.636667	9.31439	0.0428041	0.135888	Up
lnc-MSTRG.22157.1	3.55667	1	-1.83053	0.0429942	0.136294	Down
lnc-MSTRG.26279.1	3.48333	0.483333	-2.84938	0.0430043	0.136294	Down
lnc-MSTRG.34568.1	37.8567	17.32	-1.12811	0.0431387	0.13655	Down
lnc-MSTRG.6871.1	0.68	1.72667	1.34438	0.0431572	0.13655	Up
lnc-MSTRG.7141.6	1.18333	0.193333	-2.61369	0.0432619	0.136731	Down
lnc-MSTRG.7896.1	1.68	4.96667	1.56382	0.0432868	0.136731	Up
lnc-MSTRG.23900.1	3.53	6.05333	0.778062	0.0434497	0.137131	No
lnc-MSTRG.14672.1	0.001	0.346667	8.43741	0.0435064	0.137196	Up
lnc-MSTRG.13612.3	2.33	4.19333	0.847768	0.0436485	0.137529	No
lnc-MSTRG.12246.1	0.733333	1.83667	1.32455	0.0437939	0.137774	Up
lnc-MSTRG.18601.4	4.60667	1.47	-1.64791	0.0438173	0.137774	Down
lnc-MSTRG.21151.1	0.693333	0.253333	-1.45251	0.0438355	0.137774	Down
lnc-MSTRG.34257.1	3.34333	5.5	0.718144	0.0440642	0.13815	No
lnc-MSTRG.8181.1	1.02	0.276667	-1.88235	0.0440703	0.13815	Down
lnc-MSTRG.28514.1	0.876667	0.0666667	-3.71699	0.0440857	0.13815	Down
lnc-MSTRG.14108.1	1.12	2.27	1.01919	0.0441012	0.13815	Up
lnc-MSTRG.14161.2	0.26	0.001	-8.02237	0.044786	0.140179	Down
lnc-MSTRG.10302.1	0.526667	0.001	-9.04075	0.0451548	0.141216	Down
lnc-MSTRG.21037.3	0.393333	1.03	1.38882	0.0453102	0.141585	Up
lnc-MSTRG.27056.1	0.16	1.13	2.82018	0.0456376	0.142447	Up
lnc-MSTRG.21841.3	0.183333	1.19333	2.70246	0.0456613	0.142447	Up
lnc-MSTRG.7180.1	0.693333	1.47	1.0842	0.045779	0.142621	Up
lnc-MSTRG.23223.2	0.15	0.603333	2.00799	0.0457925	0.142621	Up
lnc-MSTRG.3303.2	0.996667	0.001	-9.96097	0.04615	0.143616	Down
lnc-MSTRG.23223.1	1.50667	0.316667	-2.25032	0.046764	0.145407	Down
lnc-MSTRG.3450.1	5.73	11.5167	1.00712	0.0471105	0.146364	Up
lnc-MSTRG.615.1	0.586667	0.12	-2.28951	0.0471813	0.146463	Down
lnc-MSTRG.24676.2	0.0233333	0.76	5.02554	0.0474506	0.147141	Up
lnc-MSTRG.33959.1	0.64	3.01	2.23362	0.0474836	0.147141	Up
lnc-MSTRG.21544.1	0.81	0.0833333	-3.28096	0.0475164	0.147141	Down
lnc-MSTRG.22912.1	4.81667	7.09333	0.558429	0.0476645	0.147479	No
lnc-MSTRG.26312.1	0.193333	1.18667	2.61775	0.0478057	0.147627	Up
lnc-MSTRG.2904.1	1.03	2.25	1.12728	0.0478089	0.147627	Up
lnc-MSTRG.20540.3	0.956667	1.79333	0.906555	0.0478375	0.147627	No
lnc-MSTRG.10359.1	0.0666667	0.506667	2.926	0.0479005	0.147627	Up
lnc-MSTRG.31612.1	0.001	1.09333	10.0945	0.0479076	0.147627	Up
lnc-MSTRG.24242.3	2.67333	5.12	0.937504	0.0480108	0.147825	No
lnc-MSTRG.999.1	0.33	1.53667	2.21927	0.0482331	0.148388	Up
lnc-MSTRG.25265.3	0.001	0.566667	9.14636	0.0482799	0.148408	Up
lnc-MSTRG.33111.1	1.20667	0.353333	-1.77193	0.0483306	0.148408	Down
lnc-MSTRG.12467.1	2.38667	0.896667	-1.41235	0.0483896	0.148408	Down
lnc-MSTRG.807.1	0.883333	0.0266667	-5.04985	0.0483964	0.148408	Down
lnc-MSTRG.29832.1	0.28	0.8	1.51457	0.0485505	0.14876	Up
lnc-MSTRG.24413.1	1.85667	0.496667	-1.90236	0.0486262	0.148871	Down
lnc-MSTRG.28997.1	0.643333	0.001	-9.32942	0.0487645	0.149174	Down
lnc-MSTRG.31639.1	1.51667	0.11	-3.78533	0.0497688	0.152123	Down
lnc-MSTRG.18857.2	4.17	8.12333	0.962024	0.0499819	0.152651	No
lnc-MSTRG.19833.1	2.58667	1.24333	-1.05688	0.0502812	0.153441	Down
lnc-MSTRG.7104.1	0.0366667	0.593333	4.0163	0.050325	0.153451	Up
lnc-MSTRG.2825.1	0.413333	1.38333	1.74277	0.0503937	0.153536	Up
lnc-MSTRG.29323.1	0.02	0.493333	4.62449	0.0507915	0.154624	Up
lnc-MSTRG.23591.1	0.986667	0.0866667	-3.50901	0.0509418	0.154957	Down
lnc-MSTRG.7731.1	0.443333	1.13333	1.35411	0.0510202	0.15507	Up
lnc-MSTRG.9941.4	0.246667	0.91	1.8833	0.0514508	0.156253	Up
lnc-MSTRG.13213.2	0.77	1.48333	0.945912	0.0515445	0.156314	No
lnc-MSTRG.11709.4	0.106667	0.87	3.02791	0.0515943	0.156314	Up
lnc-MSTRG.1905.4	2.30333	0.633333	-1.86269	0.0515946	0.156314	Down
lnc-MSTRG.8592.1	0.133333	1.22667	3.20163	0.0517746	0.156733	Up
lnc-MSTRG.29705.1	0.49	0.0166667	-4.87774	0.0518377	0.156799	Down
lnc-MSTRG.1898.1	0.51	0.001	-8.99435	0.0519962	0.157152	Down
lnc-MSTRG.25631.1	0.446667	0.0766667	-2.54253	0.0523423	0.158072	Down
lnc-MSTRG.3032.1	0.663333	0.0333333	-4.3147	0.0525372	0.158534	Down
lnc-MSTRG.15807.1	0.256667	0.0133333	-4.26679	0.0525907	0.158569	Down
lnc-MSTRG.34315.2	0.04	0.73	4.18982	0.0526746	0.158621	Up
lnc-MSTRG.23961.1	0.66	0.001	-9.36632	0.0526918	0.158621	Down
lnc-MSTRG.30874.5	0.623333	1.33667	1.10056	0.0528915	0.158974	Up
lnc-MSTRG.3358.2	1.14333	3.15667	1.46516	0.0528933	0.158974	Up
lnc-MSTRG.11965.1	5.6	2.47	-1.18092	0.0530029	0.159177	Down
lnc-MSTRG.34169.1	0.59	0.03	-4.29768	0.0530632	0.159232	Down
lnc-MSTRG.3085.1	2.07	0.87	-1.25054	0.0532496	0.159551	Down
lnc-MSTRG.26207.1	0.573333	1.59333	1.4746	0.0532541	0.159551	Up
lnc-MSTRG.8763.1	1.28	1.93	0.592457	0.0533253	0.159638	No
lnc-MSTRG.15659.1	0.001	0.42	8.71425	0.0537956	0.160835	Up
lnc-MSTRG.26887.2	0.15	0.716667	2.25634	0.0538403	0.160835	Up
lnc-MSTRG.28749.3	0.83	0.001	-9.69697	0.0538529	0.160835	Down
lnc-MSTRG.3680.1	0.001	0.88	9.78136	0.0539575	0.161021	Up
lnc-MSTRG.22353.1	0.343333	0.001	-8.42347	0.0541055	0.161335	Down
lnc-MSTRG.3049.1	1.29667	0.4	-1.69674	0.0543902	0.161857	Down
lnc-MSTRG.1841.1	0.11	0.886667	3.01089	0.0544024	0.161857	Up
lnc-MSTRG.9180.1	0.416667	1.21333	1.54201	0.0544303	0.161857	Up
lnc-MSTRG.24988.3	1.11333	0.22	-2.33931	0.0544919	0.161857	Down
lnc-MSTRG.7176.1	0.623333	2.35	1.91458	0.0544946	0.161857	Up
lnc-MSTRG.13411.1	0.001	0.56	9.12928	0.0550335	0.163329	Up
lnc-MSTRG.16003.1	0.21	1.05333	2.3265	0.0551084	0.163423	Up
lnc-MSTRG.26578.1	2.68667	5.11	0.927506	0.0553087	0.163889	No
lnc-MSTRG.33381.3	0.633333	1.32	1.0595	0.0556686	0.164826	Up
lnc-MSTRG.4086.1	0.45	0.0433333	-3.37638	0.056114	0.165956	Down
lnc-MSTRG.13919.1	2.87333	0.843333	-1.76855	0.0561378	0.165956	Down
lnc-MSTRG.4436.1	0.001	0.51	8.99435	0.0564135	0.16664	Up
lnc-MSTRG.20384.3	1.82	0.596667	-1.60894	0.0566427	0.167071	Down
lnc-MSTRG.25155.2	2.99667	1.55667	-0.944899	0.0566483	0.167071	No
lnc-MSTRG.24243.1	2.92333	5.51333	0.91531	0.0566918	0.167071	No
lnc-MSTRG.1384.1	0.463333	1.05333	1.18484	0.0572734	0.168562	Up
lnc-MSTRG.9165.1	0.673333	0.0566667	-3.57075	0.057287	0.168562	Down
lnc-MSTRG.1338.1	4.40667	7.5	0.767203	0.05811	0.170851	No
lnc-MSTRG.29818.1	1.21	0.0833333	-3.85997	0.0585274	0.171944	Down
lnc-MSTRG.4307.1	0.001	0.753333	9.55714	0.058706	0.172247	Up
lnc-MSTRG.266.2	0.46	0.0466667	-3.30117	0.0587217	0.172247	Down
lnc-MSTRG.7387.1	1.79	3.57333	0.997311	0.058814	0.172301	No
lnc-MSTRG.32132.1	10.1	4.63333	-1.12423	0.0588313	0.172301	Down
lnc-MSTRG.5672.1	1.06333	0.206667	-2.36322	0.0588901	0.17234	Down
lnc-MSTRG.25923.2	0.97	0.16	-2.59991	0.0590049	0.172543	Down
lnc-MSTRG.10496.1	0.92	0.193333	-2.25054	0.0590685	0.172595	Down
lnc-MSTRG.15373.5	0.196667	0.001	-7.61961	0.0592455	0.172978	Down
lnc-MSTRG.26778.1	0.173333	0.953333	2.45943	0.0595807	0.173823	Up
lnc-MSTRG.26843.1	3.75667	6.68333	0.831115	0.0603258	0.175861	No
lnc-MSTRG.24719.1	0.76	2.78	1.87101	0.0605549	0.176393	Up
lnc-MSTRG.31986.1	0.346667	0.001	-8.43741	0.0612784	0.178363	Down
lnc-MSTRG.589.2	0.216667	0.76	1.81052	0.0613737	0.178503	Up
lnc-MSTRG.32065.1	0.246667	0.656667	1.4126	0.0614912	0.178707	Up
lnc-MSTRG.24951.1	1.92	0.28	-2.77761	0.061668	0.179064	Down
lnc-MSTRG.26015.1	0.553333	0.001	-9.11201	0.0617551	0.179064	Down
lnc-MSTRG.13335.1	0.306667	1.00333	1.71006	0.061756	0.179064	Up
lnc-MSTRG.31036.1	0.02	0.216667	3.43741	0.0618659	0.179206	Up
lnc-MSTRG.27099.1	5.39333	2.73667	-0.978757	0.0618997	0.179206	No
lnc-MSTRG.908.3	6.19333	10.53	0.765717	0.0620684	0.179557	No
lnc-MSTRG.14123.1	0.496667	0.001	-8.95613	0.0622389	0.179912	Down
lnc-MSTRG.13331.1	2.21667	1.17	-0.921883	0.0622997	0.179951	No
lnc-MSTRG.3973.1	0.0933333	1.04667	3.48727	0.0624	0.180011	Up
lnc-MSTRG.23098.1	0.116667	0.713333	2.61218	0.062416	0.180011	Up
lnc-MSTRG.12322.1	3.84333	5.98333	0.638591	0.0626994	0.180691	No
lnc-MSTRG.21987.1	0.223333	0.001	-7.80305	0.0632159	0.182041	Down
lnc-MSTRG.30204.1	0.001	0.576667	9.17159	0.0634466	0.182566	Up
lnc-MSTRG.24105.1	0.31	0.001	-8.27612	0.0634986	0.182577	Down
lnc-MSTRG.11378.1	0.373333	1.72667	2.20945	0.063648	0.182858	Up
lnc-MSTRG.20340.1	0.94	0.186667	-2.3322	0.0636933	0.182858	Down
lnc-MSTRG.18877.1	0.116667	0.713333	2.61218	0.0639132	0.18335	Up
lnc-MSTRG.399.1	2.39333	0.79	-1.5991	0.0640146	0.183502	Down
lnc-MSTRG.33981.1	0.463333	0.001	-8.85591	0.0643274	0.184259	Down
lnc-MSTRG.33559.1	0.976667	0.186667	-2.3874	0.0645114	0.184646	Down
lnc-MSTRG.5416.2	3.28667	5.32333	0.695705	0.0646984	0.185041	No
lnc-MSTRG.838.3	0.98	2.6	1.40766	0.0651721	0.186187	Up
lnc-MSTRG.7751.1	2.47333	0.953333	-1.3754	0.0651974	0.186187	Down
lnc-MSTRG.16028.1	0.703333	0.06	-3.55117	0.0652948	0.186324	Down
lnc-MSTRG.5707.3	0.363333	0.0466667	-2.96083	0.0656802	0.187283	Down
lnc-MSTRG.12336.1	0.556667	0.06	-3.21378	0.0658153	0.187445	Down
lnc-MSTRG.31050.1	0.0233333	0.55	4.55897	0.0658381	0.187445	Up
lnc-MSTRG.4036.2	1.59	0.316667	-2.32799	0.0658858	0.187445	Down
lnc-MSTRG.24275.2	0.966667	1.60667	0.73298	0.0660489	0.187768	No
lnc-MSTRG.14136.1	0.186667	0.533333	1.51457	0.0662219	0.188118	Up
lnc-MSTRG.31963.1	0.496667	0.0266667	-4.21917	0.0663828	0.188433	Down
lnc-MSTRG.23931.1	0.553333	4.13	2.89992	0.0665466	0.188615	Up
lnc-MSTRG.21930.1	0.523333	0.0466667	-3.48727	0.0665467	0.188615	Down
lnc-MSTRG.2569.1	2.15	0.836667	-1.36161	0.0668851	0.189433	Down
lnc-MSTRG.31620.2	4.65667	7.79	0.742326	0.0672411	0.190298	No
lnc-MSTRG.11205.1	0.001	0.713333	9.47843	0.0673527	0.190472	Up
lnc-MSTRG.9355.1	2.31333	3.86667	0.741117	0.0676924	0.191289	No
lnc-MSTRG.33425.2	0.286667	1.44	2.32862	0.0679089	0.191758	Up
lnc-MSTRG.16002.1	4.46333	8.54	0.936115	0.0679999	0.191871	No
lnc-MSTRG.30595.1	0.69	0.123333	-2.48403	0.0681318	0.192082	Down
lnc-MSTRG.23017.2	0.88	0.11	-3	0.0681762	0.192082	Down
lnc-MSTRG.9476.1	0.406667	0.0266667	-3.93074	0.0684498	0.192708	Down
lnc-MSTRG.1096.7	0.59	2.23333	1.92041	0.0685004	0.192708	Up
lnc-MSTRG.29467.5	0.17	0.001	-7.40939	0.0685893	0.192815	Down
lnc-MSTRG.24016.2	1.80333	0.566667	-1.67009	0.0687378	0.193089	Down
lnc-MSTRG.29983.1	10.1567	4.67667	-1.11887	0.068929	0.193482	Down
lnc-MSTRG.32081.1	1.61	3.47667	1.11064	0.0690665	0.193633	Up
lnc-MSTRG.34578.1	0.72	1.56333	1.11856	0.0690852	0.193633	Up
lnc-MSTRG.21368.1	0.523333	1.86	1.8295	0.0692151	0.193854	Up
lnc-MSTRG.22329.1	2.28667	0.623333	-1.87517	0.0695552	0.194662	Down
lnc-MSTRG.24786.1	0.0566667	0.563333	3.31342	0.0696719	0.194844	Up
lnc-MSTRG.5656.2	14.3967	7.69333	-0.904054	0.0700185	0.195574	No
lnc-MSTRG.10434.2	0.36	0.04	-3.16993	0.0700858	0.195574	Down
lnc-MSTRG.24391.1	1.12667	0.456667	-1.30285	0.070088	0.195574	Down
lnc-MSTRG.21828.1	1.98333	3.74	0.915111	0.0706288	0.196938	No
lnc-MSTRG.1976.2	0.946667	0.356667	-1.40828	0.0708894	0.197519	Down
lnc-MSTRG.26319.1	0.273333	0.001	-8.09452	0.0711358	0.198059	Down
lnc-MSTRG.21539.1	0.463333	0.001	-8.85591	0.0711912	0.198068	Down
lnc-MSTRG.3653.1	0.183333	1.28	2.8036	0.0713338	0.198318	Up
lnc-MSTRG.21537.1	16.1067	8.33	-0.95127	0.0714692	0.198549	No
lnc-MSTRG.12150.2	1.39667	2.52	0.851436	0.0718671	0.199508	No
lnc-MSTRG.15390.1	0.226667	0.763333	1.75174	0.0721374	0.200111	Up
lnc-MSTRG.19096.1	0.0466667	0.513333	3.45943	0.0723529	0.200562	Up
lnc-MSTRG.33123.1	0.1	0.766667	2.9386	0.0724639	0.200722	Up
lnc-MSTRG.23054.1	1.63333	0.793333	-1.04182	0.0725333	0.200768	Down
lnc-MSTRG.5079.1	1.17667	0.363333	-1.69534	0.0730086	0.201935	Down
lnc-MSTRG.34050.1	2.85	4.95333	0.797438	0.0735361	0.203246	No
lnc-MSTRG.25729.1	0.46	1.29	1.48767	0.0736761	0.203335	Up
lnc-MSTRG.458.1	0.166667	0.746667	2.1635	0.0737034	0.203335	Up
lnc-MSTRG.16408.1	1.32667	0.283333	-2.22723	0.0737569	0.203335	Down
lnc-MSTRG.14454.2	0.206667	0.683333	1.72528	0.0737835	0.203335	Up
lnc-MSTRG.7386.1	0.32	0.001	-8.32193	0.0740227	0.203845	Down
lnc-MSTRG.16809.1	4.19667	7.14	0.76668	0.0742085	0.204208	No
lnc-MSTRG.1320.1	0.09	0.703333	2.96621	0.074392	0.204417	Up
lnc-MSTRG.31295.1	0.64	0.04	-4	0.0743924	0.204417	Down
lnc-MSTRG.30862.1	0.94	0.001	-9.87652	0.0747275	0.20469	Down
lnc-MSTRG.12644.1	2.87333	4.91	0.772998	0.0747322	0.20469	No
lnc-MSTRG.30590.1	0.88	0.103333	-3.0902	0.0747491	0.20469	Down
lnc-MSTRG.21807.1	5.12	2.15667	-1.24734	0.0748109	0.20469	Down
lnc-MSTRG.29983.2	9.36	3.92333	-1.25443	0.0748306	0.20469	Down
lnc-MSTRG.449.2	1.69667	3.36667	0.988618	0.074874	0.20469	No
lnc-MSTRG.9527.3	0.0333333	0.683333	4.35755	0.0749121	0.20469	Up
lnc-MSTRG.2857.1	0.663333	0.143333	-2.21036	0.074925	0.20469	Down
lnc-MSTRG.29418.1	0.573333	0.001	-9.16323	0.0752472	0.205319	Down
lnc-MSTRG.9349.1	2.56667	0.63	-2.02647	0.0752638	0.205319	Down
lnc-MSTRG.24053.2	0.15	0.743333	2.30905	0.0753843	0.2055	Up
lnc-MSTRG.10849.1	0.226667	1.02333	2.17463	0.0755451	0.205747	Up
lnc-MSTRG.28010.1	0.906667	0.2	-2.18057	0.0755838	0.205747	Down
lnc-MSTRG.3333.1	0.0366667	0.366667	3.32193	0.0761954	0.207262	Up
lnc-MSTRG.4396.1	0.001	0.71	9.47168	0.0768112	0.208673	Up
lnc-MSTRG.21537.2	10.51	14.64	0.478153	0.0769271	0.208673	No
lnc-MSTRG.18442.1	1.66333	0.47	-1.82334	0.0769554	0.208673	Down
lnc-MSTRG.32631.3	1.03	1.84667	0.842279	0.0769798	0.208673	No
lnc-MSTRG.1519.2	0.156667	0.446667	1.5115	0.07699	0.208673	Up
lnc-MSTRG.563.1	0.46	0.001	-8.84549	0.077237	0.209193	Down
lnc-MSTRG.16008.1	0.61	0.03	-4.34577	0.0774928	0.209735	Down
lnc-MSTRG.17990.1	8.34	1.09	-2.93572	0.0775513	0.209744	Down
lnc-MSTRG.30845.1	2.58667	0.293333	-3.14048	0.0776489	0.209854	Down
lnc-MSTRG.17122.1	0.246667	0.823333	1.73891	0.077703	0.209854	Up
lnc-MSTRG.10898.1	1.07333	2.74	1.35208	0.0779998	0.210505	Up
lnc-MSTRG.27801.1	0.133333	0.66	2.30743	0.0784777	0.211539	Up
lnc-MSTRG.10178.1	0.89	0.196667	-2.17805	0.078525	0.211539	Down
lnc-MSTRG.32795.1	0.34	0.03	-3.5025	0.0785508	0.211539	Down
lnc-MSTRG.11163.3	3.31	0.773333	-2.09767	0.0787713	0.211939	Down
lnc-MSTRG.12734.1	0.001	0.763333	9.57617	0.0788116	0.211939	Up
lnc-MSTRG.19594.1	7.21333	2.8	-1.36524	0.0795107	0.213667	Down
lnc-MSTRG.28365.1	0.313333	0.04	-2.96963	0.0798706	0.214482	Down
lnc-MSTRG.33755.1	0.001	0.596667	9.22078	0.0799899	0.21465	Up
lnc-MSTRG.13219.1	0.09	0.876667	3.28403	0.0802565	0.215166	Up
lnc-MSTRG.22120.1	0.393333	0.0266667	-3.88264	0.0802961	0.215166	Down
lnc-MSTRG.24940.1	0.68	1.88	1.46713	0.0804552	0.21544	Up
lnc-MSTRG.8176.3	0.513333	1.12333	1.12982	0.080577	0.215613	Up
lnc-MSTRG.13825.1	1.71	0.26	-2.71741	0.0810574	0.216746	Down
lnc-MSTRG.8617.1	0.53	0.001	-9.04985	0.081282	0.217192	Down
lnc-MSTRG.18780.1	3.80667	1.32	-1.52799	0.0816385	0.217991	Down
lnc-MSTRG.11800.1	2.2	0.656667	-1.74427	0.082015	0.218842	Down
lnc-MSTRG.19919.1	0.0733333	0.753333	3.36075	0.0821019	0.218851	Up
lnc-MSTRG.28391.2	0.5	0.116667	-2.09954	0.0821343	0.218851	Down
lnc-MSTRG.422.1	0.656667	0.001	-9.35902	0.0823731	0.219333	Down
lnc-MSTRG.33430.1	0.636667	0.03	-4.4075	0.0825342	0.219607	Down
lnc-MSTRG.2981.1	0.3	1.01667	1.76081	0.0826602	0.219788	Up
lnc-MSTRG.16396.2	0.38	0.0233333	-4.02554	0.0830384	0.220638	Down
lnc-MSTRG.32135.1	1.63333	0.62	-1.39748	0.0831438	0.220763	Down
lnc-MSTRG.29403.1	0.216667	0.001	-7.75933	0.0832954	0.220957	Down
lnc-MSTRG.24959.4	0.38	1.83333	2.2704	0.0833668	0.220957	Up
lnc-MSTRG.9171.1	0.51	0.001	-8.99435	0.0833921	0.220957	Down
lnc-MSTRG.24704.1	1.32667	0.42	-1.65934	0.083968	0.222249	Down
lnc-MSTRG.4949.2	0.556667	0.18	-1.62882	0.0839975	0.222249	Down
lnc-MSTRG.26057.1	0.166667	0.786667	2.23879	0.0840645	0.222271	Up
lnc-MSTRG.29710.14	2.77333	5.22333	0.91335	0.0842298	0.222312	No
lnc-MSTRG.17497.1	1.84333	0.213333	-3.11114	0.0842487	0.222312	Down
lnc-MSTRG.26764.1	1.38	0.66	-1.06413	0.0842561	0.222312	Down
lnc-MSTRG.21485.1	0.516667	1.29667	1.3275	0.0849001	0.223854	Up
lnc-MSTRG.6357.1	0.001	0.566667	9.14636	0.085107	0.224244	Up
lnc-MSTRG.3085.2	1.13	0.26	-2.11974	0.0851761	0.224269	Down
lnc-MSTRG.8943.1	0.146667	0.001	-7.1964	0.085487	0.224931	Down
lnc-MSTRG.15774.1	0.506667	1.36	1.4245	0.086008	0.226145	Up
lnc-MSTRG.16209.1	0.716667	0.0266667	-4.74819	0.0867234	0.227867	Down
lnc-MSTRG.16992.3	0.106667	0.546667	2.35755	0.086952	0.228309	Up
lnc-MSTRG.2200.1	0.806667	0.313333	-1.36427	0.0870977	0.22848	Down
lnc-MSTRG.27037.1	4.32333	8.26333	0.93458	0.0871378	0.22848	No
lnc-MSTRG.21516.1	0.853333	0.14	-2.60768	0.087857	0.230206	Down
lnc-MSTRG.5777.1	1.88667	0.716667	-1.39647	0.0885966	0.231983	Down
lnc-MSTRG.20292.4	2.52	4.37	0.79421	0.0889761	0.232725	No
lnc-MSTRG.3096.1	2.29667	3.57667	0.639074	0.089003	0.232725	No
lnc-MSTRG.467.1	0.0366667	0.753333	4.36075	0.089091	0.232794	Up
lnc-MSTRG.12465.1	0.14	0.493333	1.81714	0.0896116	0.233678	Up
lnc-MSTRG.16896.5	1.01667	0.146667	-2.79323	0.0896145	0.233678	Down
lnc-MSTRG.2737.2	1.14667	2.40667	1.06959	0.0896546	0.233678	Up
lnc-MSTRG.28698.1	1.73	4.59333	1.40877	0.0896766	0.233678	Up
lnc-MSTRG.4816.3	0.226667	1.02333	2.17463	0.0899163	0.234142	Up
lnc-MSTRG.17910.1	0.001	0.693333	9.43741	0.0903184	0.234916	Up
lnc-MSTRG.34575.1	2.86333	0.956667	-1.58161	0.090338	0.234916	Down
lnc-MSTRG.8519.2	0.376667	0.02	-4.23522	0.0904391	0.234947	Down
lnc-MSTRG.19922.2	1.04667	0.39	-1.42426	0.0904742	0.234947	Down
lnc-MSTRG.6577.1	0.776667	0.09	-3.1093	0.0906018	0.234988	Down
lnc-MSTRG.813.1	0.0566667	0.523333	3.20716	0.0906142	0.234988	Up
lnc-MSTRG.1442.1	0.366667	0.903333	1.30079	0.0906948	0.235036	Up
lnc-MSTRG.19160.7	2.43	4.5	0.888969	0.0909617	0.235566	No
lnc-MSTRG.23487.1	0.333333	1.25333	1.91073	0.0917245	0.237298	Up
lnc-MSTRG.18672.1	18.6367	7.49333	-1.31446	0.091756	0.237298	Down
lnc-MSTRG.3688.3	1.63333	0.553333	-1.5616	0.0919225	0.237566	Down
lnc-MSTRG.7840.1	0.316667	0.001	-8.30682	0.0920265	0.237672	Down
lnc-MSTRG.27585.3	33.43	44.7333	0.420207	0.0921348	0.237789	No
lnc-MSTRG.31874.1	2.49333	0.86	-1.53567	0.0926492	0.238954	Down
lnc-MSTRG.13258.1	0.466667	0.001	-8.86625	0.0927374	0.239018	Down
lnc-MSTRG.5429.1	0.98	1.8	0.877143	0.0937173	0.241124	No
lnc-MSTRG.12589.1	0.001	0.743333	9.53787	0.093736	0.241124	Up
lnc-MSTRG.2559.1	0.0233333	0.47	4.3322	0.0937458	0.241124	Up
lnc-MSTRG.7235.1	1.42333	0.49	-1.53842	0.094466	0.242812	Down
lnc-MSTRG.2741.1	1.54	0.706667	-1.12383	0.0952688	0.244709	Down
lnc-MSTRG.31032.1	1.98333	0.966667	-1.03684	0.0954108	0.244907	Down
lnc-MSTRG.22179.1	12.0233	20.6733	0.781934	0.0955211	0.245024	No
lnc-MSTRG.19078.1	0.001	0.613333	9.26053	0.0957045	0.245328	Up
lnc-MSTRG.33167.1	0.473333	1.82333	1.94565	0.0959629	0.245824	Up
lnc-MSTRG.21483.1	7.37	3.58333	-1.04036	0.0961762	0.246006	Down
lnc-MSTRG.7298.1	0.001	0.546667	9.09452	0.0962601	0.246006	Up
lnc-MSTRG.31554.1	0.603333	0.001	-9.23681	0.0963534	0.246006	Down
lnc-MSTRG.7744.1	0.263333	0.001	-8.04075	0.0963534	0.246006	Down
lnc-MSTRG.9162.3	0.913333	0.31	-1.55887	0.0963593	0.246006	Down
lnc-MSTRG.26564.1	0.81	1.57333	0.957831	0.0968028	0.246971	No
lnc-MSTRG.5543.2	1.46333	2.51333	0.780344	0.0973597	0.248225	No
lnc-MSTRG.4148.1	0.493333	0.001	-8.94642	0.0975559	0.248557	Down
lnc-MSTRG.7477.1	0.001	0.466667	8.86625	0.0977867	0.248978	Up
lnc-MSTRG.28837.1	1.07	0.33	-1.69707	0.0978902	0.249073	Down
lnc-MSTRG.6033.1	0.896667	0.001	-9.80843	0.0983003	0.249949	Down
lnc-MSTRG.21673.1	0.323333	0.99	1.61441	0.0984272	0.250103	Up
lnc-MSTRG.5937.1	3.95333	6.63	0.745939	0.098799	0.250879	No
lnc-MSTRG.23334.1	1.18	0.443333	-1.41232	0.0993397	0.252083	Down
lnc-MSTRG.7899.1	0.85	0.001	-9.73132	0.100461	0.254756	Down
lnc-MSTRG.1499.1	0.54	0.001	-9.07682	0.100984	0.255912	Down
lnc-MSTRG.26228.1	0.236667	1.07667	2.18564	0.101199	0.256285	Up
lnc-MSTRG.6638.1	1.31	2.37333	0.857348	0.10144	0.256655	No
lnc-MSTRG.5491.1	17.5867	9.47	-0.893046	0.101481	0.256655	No
lnc-MSTRG.24081.2	1.23	1.96	0.672195	0.101774	0.257224	No
lnc-MSTRG.20946.1	0.513333	1.20333	1.22907	0.101869	0.257292	Up
lnc-MSTRG.9454.2	0.396667	0.001	-8.63178	0.10202	0.257501	Down
lnc-MSTRG.30877.1	1.31667	0.623333	-1.07881	0.102412	0.258294	Down
lnc-MSTRG.9553.1	1.12	1.97	0.814697	0.102479	0.258294	No
lnc-MSTRG.5388.2	0.343333	1	1.54232	0.102539	0.258294	Up
lnc-MSTRG.28697.1	0.546667	1.6	1.54934	0.10266	0.258427	Up
lnc-MSTRG.8560.1	0.0133333	0.28	4.39232	0.102885	0.258822	Up
lnc-MSTRG.24719.2	5.63667	12.61	1.16165	0.103359	0.259663	Up
lnc-MSTRG.19146.1	2.65	1.41667	-0.903492	0.103471	0.259663	No
lnc-MSTRG.16700.1	1.34667	0.163333	-3.0435	0.103493	0.259663	Down
lnc-MSTRG.13478.1	4.25	1.89	-1.16908	0.103494	0.259663	Down
lnc-MSTRG.26474.2	0.726667	0.24	-1.59826	0.103829	0.26033	Down
lnc-MSTRG.18108.2	0.18	0.853333	2.24511	0.104795	0.262579	Up
lnc-MSTRG.21499.1	0.236667	0.69	1.54374	0.104892	0.262647	Up
lnc-MSTRG.23236.1	0.133333	0.756667	2.50462	0.105783	0.264602	Up
lnc-MSTRG.27726.3	2.39667	3.39	0.500256	0.105813	0.264602	No
lnc-MSTRG.12632.1	0.001	0.503333	8.97537	0.106039	0.264993	Up
lnc-MSTRG.31178.1	0.713333	0.273333	-1.38391	0.10626	0.265197	Down
lnc-MSTRG.29717.1	5.45333	2.38667	-1.19214	0.106261	0.265197	Down
lnc-MSTRG.7447.1	1.72667	2.58	0.579381	0.106457	0.265511	No
lnc-MSTRG.26675.1	0.573333	0.001	-9.16323	0.106817	0.266232	Down
lnc-MSTRG.17683.1	0.04	0.68	4.08746	0.107091	0.266576	Up
lnc-MSTRG.23483.2	0.553333	0.0766667	-2.85148	0.107096	0.266576	Down
lnc-MSTRG.23906.1	0.326667	0.07	-2.22239	0.107854	0.268286	Down
lnc-MSTRG.31766.1	1.95	0.516667	-1.91617	0.108092	0.268607	Down
lnc-MSTRG.4291.1	0.536667	0.04	-3.74595	0.108125	0.268607	Down
lnc-MSTRG.6823.1	0.001	0.606667	9.24476	0.108501	0.269365	Up
lnc-MSTRG.13153.1	1.53667	0.776667	-0.984437	0.108827	0.269997	No
lnc-MSTRG.21092.1	9.86	13.6733	0.471705	0.109593	0.271719	No
lnc-MSTRG.3444.1	1.16	0.5	-1.21412	0.109998	0.27243	Down
lnc-MSTRG.32150.1	0.001	0.616667	9.26835	0.110058	0.27243	Up
lnc-MSTRG.27663.1	1.75333	0.001	-10.7759	0.110096	0.27243	Down
lnc-MSTRG.26159.1	0.246667	0.001	-7.94642	0.110511	0.273266	Down
lnc-MSTRG.17021.8	0.696667	0.153333	-2.1838	0.110579	0.273266	Down
lnc-MSTRG.27964.1	52.3833	21.9	-1.25818	0.110721	0.273439	Down
lnc-MSTRG.9338.1	2.40667	0.826667	-1.54166	0.111487	0.27498	Down
lnc-MSTRG.3884.1	0.773333	0.12	-2.68806	0.11149	0.27498	Down
lnc-MSTRG.7121.1	0.513333	1.28	1.31818	0.111766	0.275481	Up
lnc-MSTRG.4665.1	0.553333	0.11	-2.33065	0.112138	0.276218	Down
lnc-MSTRG.18257.1	1.09	2.14667	0.97777	0.11233	0.276509	No
lnc-MSTRG.16992.2	0.44	1.14333	1.37767	0.112472	0.276681	Up
lnc-MSTRG.23983.5	1.19	0.373333	-1.67243	0.113078	0.277989	Down
lnc-MSTRG.33515.1	1.00667	0.1	-3.33151	0.113214	0.278144	Down
lnc-MSTRG.10962.1	0.0466667	0.88	4.23704	0.113405	0.27843	Up
lnc-MSTRG.16662.1	0.193333	0.001	-7.59495	0.113626	0.278793	Down
lnc-MSTRG.27885.2	0.001	0.656667	9.35902	0.113892	0.279265	Up
lnc-MSTRG.24147.1	1.96333	0.516667	-1.926	0.113972	0.279279	Down
lnc-MSTRG.31452.1	0.556667	1.39	1.3202	0.114101	0.279414	Up
lnc-MSTRG.10769.2	0.626667	0.163333	-1.93988	0.114537	0.2803	Down
lnc-MSTRG.11709.1	0.896667	1.29333	0.52845	0.114625	0.280335	No
lnc-MSTRG.25780.1	0.15	0.84	2.48543	0.114826	0.280645	Up
lnc-MSTRG.14604.1	0.753333	0.0833333	-3.17632	0.115086	0.281098	Down
lnc-MSTRG.19849.1	1.79333	0.89	-1.01077	0.115366	0.2816	Down
lnc-MSTRG.26160.1	0.463333	0.001	-8.85591	0.115598	0.281986	Down
lnc-MSTRG.9509.1	1.10667	0.303333	-1.86724	0.115705	0.282064	Down
lnc-MSTRG.8729.1	0.923333	0.183333	-2.33238	0.115966	0.282458	Down
lnc-MSTRG.19889.1	0.48	1.15667	1.26887	0.116016	0.282458	Up
lnc-MSTRG.14857.1	0.001	0.81	9.66178	0.1162	0.282548	Up
lnc-MSTRG.23319.1	0.001	0.323333	8.33688	0.116202	0.282548	Up
lnc-MSTRG.28360.1	11.3967	5.65667	-1.01059	0.116749	0.283626	Down
lnc-MSTRG.21802.1	0.116667	0.606667	2.37851	0.116796	0.283626	Up
lnc-MSTRG.21481.1	2.90667	1.06667	-1.44626	0.117148	0.284298	Down
lnc-MSTRG.29710.9	0.156667	0.553333	1.82045	0.117605	0.285091	Up
lnc-MSTRG.12013.1	0.32	0.92	1.52356	0.117625	0.285091	Up
lnc-MSTRG.30061.1	0.02	0.256667	3.68182	0.117826	0.285394	Up
lnc-MSTRG.1822.1	0.0533333	0.62	3.53916	0.118111	0.285901	Up
lnc-MSTRG.22753.1	1.1	0.306667	-1.84276	0.118226	0.285996	Down
lnc-MSTRG.12528.2	0.403333	1.94333	2.26849	0.11846	0.286198	Up
lnc-MSTRG.13867.5	1.24667	2.52	1.01535	0.118461	0.286198	Up
lnc-MSTRG.503.1	0.766667	1.24	0.693669	0.118885	0.287041	No
lnc-MSTRG.6358.2	0.343333	0.001	-8.42347	0.119136	0.287462	Down
lnc-MSTRG.28107.1	0.21	0.0166667	-3.65535	0.119555	0.288067	Down
lnc-MSTRG.24898.2	1.38333	4.69333	1.76246	0.119612	0.288067	Up
lnc-MSTRG.907.1	0.316667	0.833333	1.39593	0.119615	0.288067	Up
lnc-MSTRG.11516.1	0.506667	0.0366667	-3.7885	0.119776	0.28827	Down
lnc-MSTRG.22892.1	15.33	7.07333	-1.1159	0.119947	0.288418	Down
lnc-MSTRG.21606.2	1.48333	0.533333	-1.47573	0.11999	0.288418	Down
lnc-MSTRG.222.1	0.123333	0.946667	2.94029	0.120164	0.288653	Up
lnc-MSTRG.902.1	1.42667	3.14	1.13812	0.120433	0.289116	Up
lnc-MSTRG.7560.1	0.193333	0.636667	1.71945	0.120752	0.289697	Up
lnc-MSTRG.23152.1	14.7433	7.36667	-1.00098	0.121194	0.290574	Down
lnc-MSTRG.27884.1	0.001	0.483333	8.91687	0.121684	0.291565	Up
lnc-MSTRG.3067.1	0.633333	1.30667	1.04485	0.122332	0.29293	Up
lnc-MSTRG.13231.1	3.27	5.88667	0.84816	0.123048	0.294458	No
lnc-MSTRG.8990.1	0.69	0.001	-9.43045	0.123245	0.294744	Down
lnc-MSTRG.18495.1	0.71	0.1	-2.82782	0.123529	0.295236	Down
lnc-MSTRG.7058.3	19.3933	12.4667	-0.637485	0.12368	0.295411	No
lnc-MSTRG.31669.1	0.243333	0.983333	2.01475	0.123956	0.295801	Up
lnc-MSTRG.8489.1	2.38667	0.693333	-1.78338	0.124	0.295801	Down
lnc-MSTRG.18786.1	24.5467	13.36	-0.877607	0.124082	0.295809	No
lnc-MSTRG.23913.1	0.413333	0.0366667	-3.49476	0.124655	0.296988	Down
lnc-MSTRG.866.1	0.753333	1.34333	0.834457	0.125194	0.297905	No
lnc-MSTRG.32324.1	0.33	0.001	-8.36632	0.125198	0.297905	Down
lnc-MSTRG.7130.1	0.36	0.0666667	-2.43296	0.12536	0.298104	Down
lnc-MSTRG.33338.1	0.943333	1.87667	0.992333	0.125473	0.298185	No
lnc-MSTRG.9279.1	0.0933333	1.04667	3.48727	0.125666	0.298382	Up
lnc-MSTRG.6834.1	0.001	0.546667	9.09452	0.125713	0.298382	Up
lnc-MSTRG.3300.1	0.103333	0.553333	2.42084	0.126128	0.299178	Up
lnc-MSTRG.19912.1	2.56667	0.816667	-1.65208	0.126351	0.299519	Down
lnc-MSTRG.8855.1	0.353333	0.001	-8.46489	0.126557	0.29982	Down
lnc-MSTRG.12366.1	1.99667	0.783333	-1.3499	0.126753	0.299975	Down
lnc-MSTRG.26172.1	0.09	0.53	2.558	0.126866	0.299975	Up
lnc-MSTRG.16969.1	0.646667	0.14	-2.2076	0.12689	0.299975	Down
lnc-MSTRG.13503.2	0.696667	0.293333	-1.24793	0.12694	0.299975	Down
lnc-MSTRG.18804.1	0.143333	0.001	-7.16323	0.127151	0.300287	Down
lnc-MSTRG.7253.1	0.566667	1.59333	1.49148	0.127457	0.300821	Up
lnc-MSTRG.5774.1	1.30667	0.273333	-2.25716	0.127634	0.301052	Down
lnc-MSTRG.1578.1	1.19	0.57	-1.06193	0.128685	0.303339	Down
lnc-MSTRG.29710.17	1.71667	3.69667	1.10662	0.128788	0.303394	Up
lnc-MSTRG.32980.1	0.56	1.38667	1.30812	0.129037	0.303791	Up
lnc-MSTRG.20098.1	1.18	1.86667	0.661677	0.130406	0.306822	No
lnc-MSTRG.21669.1	0.493333	0.0266667	-4.20945	0.131394	0.308955	Down
lnc-MSTRG.7023.3	3.11	1.7	-0.87138	0.131481	0.308967	No
lnc-MSTRG.8917.4	1.13667	2.50333	1.13904	0.132389	0.310908	Up
lnc-MSTRG.32010.1	10.34	16.2567	0.652795	0.132827	0.311744	No
lnc-MSTRG.16552.1	0.296667	0.001	-8.2127	0.133705	0.313609	Down
lnc-MSTRG.26785.1	0.74	2.15333	1.54097	0.133832	0.313712	Up
lnc-MSTRG.4099.1	0.483333	1.19667	1.30793	0.134295	0.314432	Up
lnc-MSTRG.14503.1	0.206667	1.02333	2.3079	0.134305	0.314432	Up
lnc-MSTRG.27952.1	0.263333	0.001	-8.04075	0.13445	0.314576	Down
lnc-MSTRG.17558.1	3.54	1.71333	-1.04694	0.134674	0.314776	Down
lnc-MSTRG.27085.1	0.03	0.426667	3.83007	0.134702	0.314776	Up
lnc-MSTRG.29026.1	0.116667	0.463333	1.98966	0.135028	0.315343	Up
lnc-MSTRG.34264.1	0.22	0.963333	2.13053	0.135386	0.315847	Up
lnc-MSTRG.10216.1	0.683333	0.32	-1.09452	0.135451	0.315847	Down
lnc-MSTRG.34189.1	1.96667	0.716667	-1.45638	0.135494	0.315847	Down
lnc-MSTRG.25424.1	1.33	2.76	1.05324	0.135707	0.316148	Up
lnc-MSTRG.27360.1	0.0733333	0.493333	2.75002	0.136215	0.317137	Up
lnc-MSTRG.9417.1	34.7867	20.1233	-0.789665	0.136721	0.318118	No
lnc-MSTRG.28696.1	0.496667	1.88333	1.92294	0.137867	0.320587	Up
lnc-MSTRG.2327.1	0.756667	0.12	-2.65662	0.138092	0.320913	Down
lnc-MSTRG.1133.1	0.001	0.606667	9.24476	0.13858	0.32185	Up
lnc-MSTRG.1164.4	3.46	2.12333	-0.704441	0.139161	0.322716	No
lnc-MSTRG.12607.1	1.23667	2.50667	1.01931	0.139181	0.322716	Up
lnc-MSTRG.11810.1	0.001	0.556667	9.12067	0.139294	0.322716	Up
lnc-MSTRG.12094.1	0.001	0.516667	9.01309	0.139294	0.322716	Up
lnc-MSTRG.21957.1	0.0333333	0.283333	3.08746	0.139512	0.323021	Up
lnc-MSTRG.12334.1	0.633333	0.0733333	-3.11042	0.139981	0.32391	Down
lnc-MSTRG.13640.1	0.0533333	0.583333	3.45121	0.140229	0.324285	Up
lnc-MSTRG.15424.1	0.263333	0.001	-8.04075	0.140878	0.325586	Down
lnc-MSTRG.23778.1	0.02	0.5	4.64386	0.141043	0.32577	Up
lnc-MSTRG.32041.1	0.38	0.0533333	-2.83289	0.141381	0.326351	Down
lnc-MSTRG.12075.1	0.296667	1.2	2.01612	0.141588	0.326576	Up
lnc-MSTRG.27107.2	1.3	2.09333	0.68729	0.141652	0.326576	No
lnc-MSTRG.31914.1	0.493333	0.02	-4.62449	0.142076	0.327295	Down
lnc-MSTRG.3368.1	0.133333	0.82	2.62059	0.142137	0.327295	Up
lnc-MSTRG.19255.1	1.64667	0.873333	-0.914944	0.142692	0.328373	No
lnc-MSTRG.27899.5	3.02667	4.6	0.603904	0.142847	0.328379	No
lnc-MSTRG.2745.1	0.313333	0.856667	1.45104	0.142919	0.328379	Up
lnc-MSTRG.24202.2	1.09667	2.1	0.937264	0.143004	0.328379	No
lnc-MSTRG.4778.2	0.896667	1.39667	0.639344	0.143143	0.328379	No
lnc-MSTRG.16187.1	1.05667	1.83	0.792323	0.143167	0.328379	No
lnc-MSTRG.9398.1	0.0466667	0.693333	3.89308	0.143215	0.328379	Up
lnc-MSTRG.19239.1	0.001	0.54	9.07682	0.143584	0.328626	Up
lnc-MSTRG.24071.1	0.001	0.543333	9.08569	0.143584	0.328626	Up
lnc-MSTRG.6979.1	0.001	0.456667	8.835	0.143584	0.328626	Up
lnc-MSTRG.4287.1	0.163333	0.606667	1.89308	0.144018	0.329325	Up
lnc-MSTRG.21644.3	2.51667	0.686667	-1.87383	0.144064	0.329325	Down
lnc-MSTRG.5477.1	46.71	23.9233	-0.965313	0.144185	0.329325	No
lnc-MSTRG.11079.2	0.51	1.2	1.23447	0.144237	0.329325	Up
lnc-MSTRG.23053.1	0.906667	0.403333	-1.1686	0.144976	0.330811	Down
lnc-MSTRG.20987.1	0.0633333	0.41	2.69459	0.145123	0.330946	Up
lnc-MSTRG.19430.2	0.246667	0.01	-4.62449	0.145504	0.331568	Down
lnc-MSTRG.29030.1	1.76667	0.836667	-1.0783	0.145571	0.331568	Down
lnc-MSTRG.20292.5	0.32	1.22667	1.9386	0.146329	0.332984	Up
lnc-MSTRG.34597.1	1.17333	0.666667	-0.815575	0.146387	0.332984	No
lnc-MSTRG.21447.1	0.001	0.403333	8.65583	0.146457	0.332984	Up
lnc-MSTRG.3403.1	0.273333	0.86	1.65368	0.146636	0.332984	Up
lnc-MSTRG.566.1	1.24	0.3	-2.04731	0.146681	0.332984	Down
lnc-MSTRG.11367.1	0.336667	0.776667	1.20597	0.146721	0.332984	Up
lnc-MSTRG.5405.1	1.00333	1.98667	0.985549	0.146847	0.33307	No
lnc-MSTRG.21586.1	1.54667	0.376667	-2.0378	0.147268	0.333826	Down
lnc-MSTRG.26272.1	1.53667	0.806667	-0.92976	0.147806	0.334712	No
lnc-MSTRG.21145.1	0.001	0.603333	9.23681	0.147836	0.334712	Up
lnc-MSTRG.25911.1	0.116667	0.446667	1.93681	0.148063	0.334802	Up
lnc-MSTRG.23104.1	1.94667	1.06	-0.876942	0.148108	0.334802	No
lnc-MSTRG.12974.2	3.07333	4.74333	0.626097	0.148142	0.334802	No
lnc-MSTRG.12230.3	0.563333	1.97	1.80613	0.148323	0.334842	Up
lnc-MSTRG.22497.3	4.28	2.06333	-1.05263	0.148367	0.334842	Down
lnc-MSTRG.24427.1	5.11667	9.87333	0.948333	0.148425	0.334842	No
lnc-MSTRG.1734.1	1.06667	1.62333	0.60585	0.148783	0.33545	No
lnc-MSTRG.26250.2	2.54667	1.37333	-0.890928	0.150082	0.338178	No
lnc-MSTRG.14782.1	49.8267	32.3	-0.625384	0.150414	0.338722	No
lnc-MSTRG.8563.2	1.49333	0.776667	-0.943169	0.150683	0.339127	No
lnc-MSTRG.4903.1	0.343333	0.99	1.52782	0.150948	0.33952	Up
lnc-MSTRG.27538.2	0.506667	1.66333	1.71497	0.151826	0.341293	Up
lnc-MSTRG.22653.1	0.376667	0.0266667	-3.82018	0.152034	0.341557	Down
lnc-MSTRG.20885.1	20.8733	26.82	0.361648	0.152296	0.341942	No
lnc-MSTRG.11201.1	1.13667	0.273333	-2.05608	0.152651	0.342447	Down
lnc-MSTRG.32854.1	2.37	1.08667	-1.12498	0.152702	0.342447	Down
lnc-MSTRG.12072.1	0.236667	1.06667	2.17218	0.153146	0.34324	Up
lnc-MSTRG.31899.1	0.856667	0.246667	-1.79617	0.154024	0.345004	Down
lnc-MSTRG.15357.1	1.35	2.27	0.749733	0.154287	0.345387	No
lnc-MSTRG.18058.1	4.05667	2.16667	-0.904818	0.154434	0.345511	No
lnc-MSTRG.4181.1	0.0433333	0.603333	3.79941	0.154645	0.345518	Up
lnc-MSTRG.8692.2	0.176667	0.001	-7.46489	0.154646	0.345518	Down
lnc-MSTRG.33774.1	0.001	0.526667	9.04075	0.154711	0.345518	Up
lnc-MSTRG.31698.1	0.74	0.001	-9.53138	0.15498	0.345914	Down
lnc-MSTRG.21257.4	2.57	0.44	-2.54619	0.155698	0.347312	Down
lnc-MSTRG.12402.1	15.6233	8.14	-0.940602	0.155951	0.347422	No
lnc-MSTRG.11473.1	3.18333	1.20667	-1.39951	0.155979	0.347422	Down
lnc-MSTRG.13184.2	0.436667	0.001	-8.77039	0.156023	0.347422	Down
lnc-MSTRG.18061.1	4.70667	2.45	-0.941924	0.156545	0.348379	No
lnc-MSTRG.2771.1	0.37	0.001	-8.53138	0.157297	0.349751	Down
lnc-MSTRG.6091.1	0.346667	1	1.52838	0.157377	0.349751	Up
lnc-MSTRG.23639.1	0.0466667	0.653333	3.80735	0.157439	0.349751	Up
lnc-MSTRG.7222.1	0.593333	0.09	-2.72085	0.158001	0.350793	Down
lnc-MSTRG.11280.1	1.07333	2.02333	0.914636	0.158545	0.351795	No
lnc-MSTRG.32046.1	0.25	0.74	1.5656	0.159181	0.352971	Up
lnc-MSTRG.33334.8	0.916667	0.12	-2.93336	0.159261	0.352971	Down
lnc-MSTRG.3712.1	0.906667	0.001	-9.82443	0.160898	0.356121	Down
lnc-MSTRG.28779.1	0.71	0.13	-2.44931	0.160941	0.356121	Down
lnc-MSTRG.20330.1	4.06333	1.82	-1.15873	0.160966	0.356121	Down
lnc-MSTRG.8148.1	0.0533333	0.523333	3.29462	0.161605	0.357326	Up
lnc-MSTRG.28506.1	0.386667	1.25333	1.69661	0.162583	0.359077	Up
lnc-MSTRG.32194.1	0.3	0.001	-8.22882	0.162807	0.359077	Down
lnc-MSTRG.5216.1	0.133333	0.676667	2.34341	0.162833	0.359077	Up
lnc-MSTRG.25968.1	0.973333	0.406667	-1.25909	0.162901	0.359077	Down
lnc-MSTRG.23820.4	3.31333	4.27	0.365953	0.162938	0.359077	No
lnc-MSTRG.3274.1	0.001	0.97	9.92184	0.162967	0.359077	Up
lnc-MSTRG.21465.1	55.8167	20.4	-1.45213	0.163705	0.360494	Down
lnc-MSTRG.30115.1	3.43667	1.79667	-0.935687	0.164366	0.36174	No
lnc-MSTRG.10166.3	1.35333	0.306667	-2.14177	0.164574	0.361987	Down
lnc-MSTRG.5512.1	0.09	0.59	2.71272	0.165578	0.363931	Up
lnc-MSTRG.9548.1	0.116667	0.593333	2.34645	0.165651	0.363931	Up
lnc-MSTRG.2332.2	0.11	0.526667	2.25939	0.16639	0.3651	Up
lnc-MSTRG.23230.1	1.09	0.483333	-1.17324	0.166409	0.3651	Down
lnc-MSTRG.33795.1	0.66	0.001	-9.36632	0.166569	0.3651	Down
lnc-MSTRG.3656.1	0.566667	0.001	-9.14636	0.166569	0.3651	Down
lnc-MSTRG.30458.1	6.92333	3.57667	-0.952851	0.166771	0.365314	No
lnc-MSTRG.4507.1	8.46667	5.27333	-0.683079	0.16686	0.365314	No
lnc-MSTRG.1662.1	1.64667	0.546667	-1.59082	0.167075	0.365479	Down
lnc-MSTRG.11938.1	4.09333	0.826667	-2.3079	0.167129	0.365479	Down
lnc-MSTRG.17280.1	5.67333	1.68667	-1.75002	0.167354	0.365761	Down
lnc-MSTRG.17982.1	15.9167	6.52333	-1.28686	0.168477	0.368001	Down
lnc-MSTRG.34204.1	0.04	0.533333	3.73697	0.168919	0.368754	Up
lnc-MSTRG.23082.1	0.001	0.623333	9.28386	0.169379	0.369546	Up
lnc-MSTRG.19405.2	0.576667	1.26667	1.13523	0.16953	0.369663	Up
lnc-MSTRG.16620.1	0.616667	0.0933333	-2.72403	0.169696	0.369809	Down
lnc-MSTRG.34398.1	0.683333	0.17	-2.00705	0.170412	0.371038	Down
lnc-MSTRG.32062.1	11.8533	6.66667	-0.830255	0.170585	0.371038	No
lnc-MSTRG.18269.1	7.79333	5.23667	-0.573592	0.170644	0.371038	No
lnc-MSTRG.10938.1	0.11	0.69	2.64909	0.170652	0.371038	Up
lnc-MSTRG.24579.1	0.506667	0.02	-4.66297	0.171645	0.372982	Down
lnc-MSTRG.19182.1	2.52667	4.85667	0.942731	0.172007	0.373554	No
lnc-MSTRG.28466.1	2.37667	0.733333	-1.6964	0.172235	0.373738	Down
lnc-MSTRG.34374.1	0.16	0.01	-4	0.172289	0.373738	Down
lnc-MSTRG.23046.1	0.713333	1.88333	1.40064	0.172395	0.373753	Up
lnc-MSTRG.32583.1	3.09667	1.77667	-0.801543	0.17282	0.374459	No
lnc-MSTRG.31568.1	1.55333	0.443333	-1.8089	0.172946	0.374519	Down
lnc-MSTRG.28624.1	0.39	0.001	-8.60733	0.173231	0.374706	Down
lnc-MSTRG.29799.1	1.25333	0.001	-10.2916	0.173231	0.374706	Down
lnc-MSTRG.14517.1	1.23	1.75	0.508697	0.17441	0.377041	No
lnc-MSTRG.34179.1	0.001	0.733333	9.51833	0.174512	0.377046	Up
lnc-MSTRG.29950.1	0.586667	1.13667	0.954196	0.174847	0.377554	No
lnc-MSTRG.9788.1	0.333333	0.79	1.24489	0.175009	0.377689	Up
lnc-MSTRG.32583.4	1.57	0.906667	-0.79212	0.175649	0.378852	No
lnc-MSTRG.19296.1	0.453333	0.763333	0.751741	0.176272	0.379979	No
lnc-MSTRG.30291.1	0.426667	0.1	-2.09311	0.177967	0.383414	Down
lnc-MSTRG.33576.3	5.10667	3.37333	-0.598207	0.178643	0.384553	No
lnc-MSTRG.26486.1	0.59	1.09	0.885541	0.178758	0.384553	No
lnc-MSTRG.21419.1	0.43	0.001	-8.74819	0.178807	0.384553	Down
lnc-MSTRG.25797.1	5.29	2.28667	-1.21002	0.178902	0.384553	Down
lnc-MSTRG.26239.1	0.81	1.41667	0.806507	0.179233	0.385045	No
lnc-MSTRG.26239.2	0.001	0.07	6.12928	0.179527	0.385293	Up
lnc-MSTRG.639.1	0.383333	0.06	-2.67557	0.179552	0.385293	Down
lnc-MSTRG.25486.1	0.653333	0.0266667	-4.61471	0.179661	0.385307	Down
lnc-MSTRG.18574.1	1.10333	1.99333	0.853314	0.179879	0.385558	No
lnc-MSTRG.12442.1	3.89333	2.42333	-0.684013	0.180727	0.387156	No
lnc-MSTRG.10981.4	0.213333	0.723333	1.76155	0.180907	0.387322	Up
lnc-MSTRG.23827.1	1.65333	2.87667	0.79902	0.181013	0.38733	No
lnc-MSTRG.29680.1	0.09	0.77	3.09686	0.18113	0.38736	Up
lnc-MSTRG.31433.1	11.6167	21.9967	0.921089	0.181831	0.38864	No
lnc-MSTRG.30730.2	0.176667	0.393333	1.15472	0.182468	0.389781	Up
lnc-MSTRG.1234.1	0.106667	0.693333	2.70044	0.18308	0.39052	Up
lnc-MSTRG.21541.1	0.11	0.263333	1.25939	0.183084	0.39052	Up
lnc-MSTRG.11618.1	1.73667	0.656667	-1.40309	0.183124	0.39052	Down
lnc-MSTRG.31632.1	0.001	0.636667	9.31439	0.183299	0.390672	Up
lnc-MSTRG.11091.1	0.163333	0.623333	1.93218	0.183527	0.390938	Up
lnc-MSTRG.5324.1	8.91667	5.23	-0.769694	0.183843	0.39139	No
lnc-MSTRG.27024.1	0.456667	1.06333	1.21938	0.184488	0.392544	Up
lnc-MSTRG.21876.1	0.08	0.433333	2.43741	0.185167	0.393766	Up
lnc-MSTRG.17425.1	0.973333	0.296667	-1.71409	0.185711	0.394701	Down
lnc-MSTRG.28049.2	0.15	0.79	2.39689	0.185873	0.394823	Up
lnc-MSTRG.9959.1	1.63667	0.446667	-1.87349	0.186431	0.395531	Down
lnc-MSTRG.28722.1	0.82	0.23	-1.83399	0.186511	0.395531	Down
lnc-MSTRG.21725.3	2.34333	1.34	-0.806329	0.18652	0.395531	No
lnc-MSTRG.25185.1	0.001	0.536667	9.06788	0.188057	0.398101	Up
lnc-MSTRG.12210.1	0.523333	1.16	1.14832	0.188084	0.398101	Up
lnc-MSTRG.26287.1	3.60667	1.62667	-1.14875	0.188088	0.398101	Down
lnc-MSTRG.33348.3	4.36	5.5	0.335103	0.18819	0.398101	No
lnc-MSTRG.33673.1	0.423333	0.02	-4.40372	0.188259	0.398101	Down
lnc-MSTRG.21660.1	0.8	0.001	-9.64386	0.188731	0.398877	Down
lnc-MSTRG.24451.1	4.45	1.15667	-1.94383	0.189018	0.399261	Down
lnc-MSTRG.6384.3	0.463333	0.0966667	-2.26096	0.18956	0.400182	Down
lnc-MSTRG.31418.1	0.706667	0.09	-2.97303	0.190144	0.401191	Down
lnc-MSTRG.6027.1	0.703333	0.001	-9.45806	0.190711	0.401943	Down
lnc-MSTRG.24029.1	1.68333	0.526667	-1.67636	0.190713	0.401943	Down
lnc-MSTRG.32039.1	0.3	1.40333	2.22582	0.190894	0.4021	Up
lnc-MSTRG.34475.1	1.05	0.186667	-2.49185	0.191459	0.403066	Down
lnc-MSTRG.33700.1	0.001	0.346667	8.43741	0.191825	0.403238	Up
lnc-MSTRG.30053.1	0.143333	0.02	-2.8413	0.191914	0.403238	Down
lnc-MSTRG.26723.4	0.7	1.6	1.19265	0.191974	0.403238	Up
lnc-MSTRG.7399.1	0.146667	0.001	-7.1964	0.192048	0.403238	Down
lnc-MSTRG.26743.2	1.18667	0.343333	-1.78923	0.192074	0.403238	Down
lnc-MSTRG.29524.1	0.001	0.366667	8.51833	0.192228	0.403338	Up
lnc-MSTRG.14466.1	3.71	2.41667	-0.618401	0.192359	0.403388	No
lnc-MSTRG.21163.1	5.65333	3.46333	-0.706941	0.193113	0.404746	No
lnc-MSTRG.9353.3	0.276667	0.001	-8.11201	0.193424	0.405172	Down
lnc-MSTRG.14517.2	0.316667	0.67	1.0812	0.193682	0.405487	Up
lnc-MSTRG.5327.1	0.001	0.603333	9.23681	0.193958	0.405696	Up
lnc-MSTRG.8410.1	0.001	0.356667	8.47843	0.193996	0.405696	Up
lnc-MSTRG.15843.1	0.196667	0.001	-7.61961	0.194296	0.406018	Down
lnc-MSTRG.10332.1	0.23	0.001	-7.84549	0.19462	0.406018	Down
lnc-MSTRG.28992.1	0.233333	0.001	-7.86625	0.19462	0.406018	Down
lnc-MSTRG.31732.1	0.466667	0.001	-8.86625	0.19462	0.406018	Down
lnc-MSTRG.21912.1	0.83	0.356667	-1.21853	0.194737	0.406018	Down
lnc-MSTRG.28671.1	0.226667	0.45	0.989353	0.194794	0.406018	No
lnc-MSTRG.33783.1	4.95667	2.01	-1.30217	0.19525	0.406745	Down
lnc-MSTRG.29780.1	0.001	0.84	9.71425	0.195763	0.407589	Up
lnc-MSTRG.17701.1	0.346667	0.813333	1.2303	0.196402	0.408691	Up
lnc-MSTRG.31069.7	1.28	0.26	-2.29956	0.196699	0.408691	Down
lnc-MSTRG.10652.1	0.153333	0.396667	1.37126	0.19674	0.408691	Up
lnc-MSTRG.32019.1	0.246667	0.73	1.56533	0.196787	0.408691	Up
lnc-MSTRG.9227.2	0.956667	0.386667	-1.30693	0.196833	0.408691	Down
lnc-MSTRG.27700.1	0.67	1.08333	0.693244	0.197611	0.41008	No
lnc-MSTRG.15120.1	0.473333	0.14	-1.75743	0.197729	0.4101	Down
lnc-MSTRG.23396.2	19.78	11.4633	-0.787016	0.198069	0.41058	No
lnc-MSTRG.23660.1	1.20667	1.74667	0.533577	0.198209	0.410646	No
lnc-MSTRG.12248.2	0.41	1.34333	1.71212	0.198885	0.411821	Up
lnc-MSTRG.29077.1	1.88667	1.19333	-0.660842	0.199127	0.412095	No
lnc-MSTRG.14517.3	0.36	0.001	-8.49185	0.19966	0.412974	Down
lnc-MSTRG.13789.1	0.636667	0.001	-9.31439	0.200942	0.414944	Down
lnc-MSTRG.1921.1	0.546667	0.001	-9.09452	0.200942	0.414944	Down
lnc-MSTRG.25561.1	0.6	0.001	-9.22882	0.200942	0.414944	Down
lnc-MSTRG.31105.1	1	2.06	1.04264	0.203201	0.419143	Up
lnc-MSTRG.19255.2	1.06	1.67667	0.661532	0.203221	0.419143	No
lnc-MSTRG.28605.1	0.39	0.0666667	-2.54844	0.203632	0.419143	Down
lnc-MSTRG.14734.1	0.143333	0.001	-7.16323	0.203749	0.419143	Down
lnc-MSTRG.30177.1	0.103333	0.473333	2.19555	0.203942	0.419143	Up
lnc-MSTRG.31738.1	0.116667	0.52	2.15612	0.204013	0.419143	Up
lnc-MSTRG.10169.1	0.001	0.516667	9.01309	0.204223	0.419143	Up
lnc-MSTRG.2610.1	0.001	0.566667	9.14636	0.204223	0.419143	Up
lnc-MSTRG.6391.1	0.001	0.373333	8.54432	0.204223	0.419143	Up
lnc-MSTRG.11239.1	0.61	0.1	-2.60881	0.204277	0.419143	Down
lnc-MSTRG.32108.1	0.433333	1.36333	1.65359	0.20436	0.419143	Up
lnc-MSTRG.21520.2	1.57333	0.886667	-0.827361	0.204401	0.419143	No
lnc-MSTRG.26056.1	0.23	0.776667	1.75566	0.204417	0.419143	Up
lnc-MSTRG.31278.1	40.4333	24.09	-0.747111	0.204593	0.419276	No
lnc-MSTRG.29771.2	8.25667	2.63	-1.6505	0.205295	0.420228	Down
lnc-MSTRG.18996.2	0.136667	0.02	-2.77259	0.205402	0.420228	Down
lnc-MSTRG.24564.1	0.94	1.84667	0.974191	0.205435	0.420228	No
lnc-MSTRG.13438.1	1.76333	0.7	-1.33288	0.205502	0.420228	Down
lnc-MSTRG.11558.1	1.35667	0.633333	-1.09903	0.206813	0.422681	Down
lnc-MSTRG.21410.1	0.001	0.246667	7.94642	0.20722	0.423284	Up
lnc-MSTRG.30666.1	1.21667	1.65333	0.442444	0.207709	0.42368	No
lnc-MSTRG.23354.1	1.02333	0.503333	-1.02369	0.207748	0.42368	Down
lnc-MSTRG.17319.1	0.286667	0.001	-8.16323	0.20775	0.42368	Down
lnc-MSTRG.28412.1	0.55	1.17333	1.09311	0.208859	0.425334	Up
lnc-MSTRG.1263.2	0.826667	1.47333	0.833706	0.208882	0.425334	No
lnc-MSTRG.29119.1	0.573333	1.64333	1.51918	0.208898	0.425334	Up
lnc-MSTRG.24403.6	0.353333	1.25667	1.8305	0.209059	0.425432	Up
lnc-MSTRG.118.1	1.77	0.81	-1.12776	0.209627	0.426357	Down
lnc-MSTRG.30155.1	0.56	0.0766667	-2.86876	0.209941	0.426767	Down
lnc-MSTRG.34178.1	0.09	0.446667	2.3112	0.210466	0.427605	Up
lnc-MSTRG.22819.1	4.00333	5.38333	0.427298	0.211163	0.42879	No
lnc-MSTRG.34029.1	1.06333	0.29	-1.87447	0.211541	0.429327	Down
lnc-MSTRG.30238.1	0.363333	1.12333	1.62842	0.212173	0.430379	Up
lnc-MSTRG.18109.1	0.48	1.59333	1.73094	0.21232	0.430446	Up
lnc-MSTRG.25299.1	0.15	0.363333	1.27633	0.212662	0.430461	Up
lnc-MSTRG.17781.1	1.03	3.34	1.6972	0.212718	0.430461	Up
lnc-MSTRG.24072.1	0.001	0.503333	8.97537	0.212783	0.430461	Up
lnc-MSTRG.24955.1	0.001	0.47	8.87652	0.212783	0.430461	Up
lnc-MSTRG.11883.1	0.001	0.563333	9.13785	0.213561	0.430654	Up
lnc-MSTRG.18749.1	0.001	0.49	8.93664	0.213561	0.430654	Up
lnc-MSTRG.19167.1	0.001	0.62	9.27612	0.213561	0.430654	Up
lnc-MSTRG.28941.1	0.001	0.78	9.60733	0.213561	0.430654	Up
lnc-MSTRG.32386.3	0.001	0.633333	9.30682	0.213561	0.430654	Up
lnc-MSTRG.5123.3	0.001	0.13	7.02237	0.213561	0.430654	Up
lnc-MSTRG.16621.4	0.343333	1.09333	1.67105	0.21492	0.433078	Up
lnc-MSTRG.24103.1	1.47667	0.66	-1.16181	0.215107	0.433078	Down
lnc-MSTRG.12963.1	0.493333	0.001	-8.94642	0.215107	0.433078	Down
lnc-MSTRG.4778.1	0.933333	1.57333	0.75336	0.215441	0.433519	No
lnc-MSTRG.11583.1	0.113333	0.873333	2.94596	0.215603	0.433615	Up
lnc-MSTRG.30064.2	2.63333	1.25667	-1.06729	0.216974	0.43614	Down
lnc-MSTRG.34359.1	4.97667	2.64	-0.914642	0.217842	0.437421	No
lnc-MSTRG.30286.1	19.4967	50.3567	1.36896	0.217843	0.437421	Up
lnc-MSTRG.4856.1	7.95667	4.83667	-0.718151	0.217976	0.437456	No
lnc-MSTRG.4599.5	3.21	1.91667	-0.743974	0.218924	0.439125	No
lnc-MSTRG.24031.1	0.42	0.123333	-1.76783	0.219323	0.439692	Down
lnc-MSTRG.21301.1	0.74	1.64667	1.15395	0.220404	0.441626	Up
lnc-MSTRG.14397.2	0.576667	1.2	1.05722	0.220771	0.442127	Up
lnc-MSTRG.16381.1	0.0733333	0.533333	2.8625	0.221609	0.443571	Up
lnc-MSTRG.17021.7	2.11333	0.813333	-1.3776	0.222447	0.443722	Down
lnc-MSTRG.29977.1	0.5	0.001	-8.96578	0.22309	0.443722	Down
lnc-MSTRG.31688.1	0.526667	0.001	-9.04075	0.22309	0.443722	Down
lnc-MSTRG.12298.1	0.04	0.49	3.61471	0.223424	0.443722	Up
lnc-MSTRG.121.1	0.001	0.653333	9.35168	0.223481	0.443722	Up
lnc-MSTRG.10229.1	4.08333	5.66	0.471055	0.223569	0.443722	No
lnc-MSTRG.6522.1	0.0366667	0.48	3.71049	0.22358	0.443722	Up
lnc-MSTRG.12500.1	0.001	0.586667	9.1964	0.223937	0.443722	Up
lnc-MSTRG.23259.1	0.001	0.69	9.43045	0.223937	0.443722	Up
lnc-MSTRG.23412.1	0.001	0.553333	9.11201	0.223937	0.443722	Up
lnc-MSTRG.24303.1	0.001	0.56	9.12928	0.223937	0.443722	Up
lnc-MSTRG.29056.1	0.001	0.363333	8.50515	0.223937	0.443722	Up
lnc-MSTRG.29174.1	0.001	0.663333	9.37359	0.223937	0.443722	Up
lnc-MSTRG.30532.1	0.001	0.51	8.99435	0.223937	0.443722	Up
lnc-MSTRG.30538.1	0.001	0.446667	8.80305	0.223937	0.443722	Up
lnc-MSTRG.33243.1	0.001	0.486667	8.92679	0.223937	0.443722	Up
lnc-MSTRG.34132.1	0.001	0.503333	8.97537	0.223937	0.443722	Up
lnc-MSTRG.3683.1	0.001	0.476667	8.89684	0.223937	0.443722	Up
lnc-MSTRG.3787.3	0.001	0.233333	7.86625	0.223937	0.443722	Up
lnc-MSTRG.7395.2	6.45	3.47333	-0.892978	0.224032	0.443722	No
lnc-MSTRG.12830.3	2.73667	1.6	-0.774348	0.225124	0.445603	No
lnc-MSTRG.2107.1	1.18667	0.35	-1.76149	0.225389	0.445603	Down
lnc-MSTRG.28324.1	3.22667	1.93	-0.741444	0.225429	0.445603	No
lnc-MSTRG.188.2	0.726667	0.0733333	-3.30875	0.225461	0.445603	Down
lnc-MSTRG.19198.1	1.48333	2.03	0.452637	0.225571	0.445603	No
lnc-MSTRG.3468.1	1935.28	990.263	-0.966656	0.226384	0.446898	No
lnc-MSTRG.15398.2	1.17	0.406667	-1.52459	0.226489	0.446898	Down
lnc-MSTRG.16038.1	0.001	0.42	8.71425	0.226581	0.446898	Up
lnc-MSTRG.1469.1	0.226667	0.001	-7.82443	0.226851	0.447197	Down
lnc-MSTRG.14275.2	2.04333	3.50667	0.779176	0.227197	0.447646	No
lnc-MSTRG.16543.1	1.52	2.39	0.652939	0.227519	0.448047	No
lnc-MSTRG.10728.1	0.001	0.49	8.93664	0.227772	0.448066	Up
lnc-MSTRG.3834.1	0.343333	0.99	1.52782	0.227788	0.448066	Up
lnc-MSTRG.18607.1	4.08333	2.8	-0.544321	0.227904	0.448066	No
lnc-MSTRG.33796.1	1.04667	0.206667	-2.34042	0.228003	0.448066	Down
lnc-MSTRG.13076.1	0.78	0.001	-9.60733	0.228792	0.449383	Down
lnc-MSTRG.12965.1	0.47	0.0233333	-4.3322	0.22973	0.45099	Down
lnc-MSTRG.2954.2	0.08	0.001	-6.32193	0.230059	0.451165	Down
lnc-MSTRG.14121.1	0.303333	0.123333	-1.29834	0.230172	0.451165	Down
lnc-MSTRG.21654.1	50.5367	36.0267	-0.488265	0.230176	0.451165	No
lnc-MSTRG.28579.1	0.593333	1.16667	0.975478	0.230797	0.452148	No
lnc-MSTRG.4423.1	0.406667	0.84	1.04654	0.230965	0.452241	Up
lnc-MSTRG.30408.1	0.453333	0.05	-3.18057	0.231369	0.452798	Down
lnc-MSTRG.34190.1	0.6	0.03	-4.32193	0.231556	0.45293	Down
lnc-MSTRG.28545.1	1.27333	0.406667	-1.64669	0.23174	0.453056	Down
lnc-MSTRG.3796.1	0.426667	0.0333333	-3.67807	0.232433	0.454175	Down
lnc-MSTRG.15193.1	0.103333	0.623333	2.5927	0.233497	0.455799	Up
lnc-MSTRG.33701.1	0.001	0.506667	8.98489	0.233505	0.455799	Up
lnc-MSTRG.8395.1	0.32	0.08	-2	0.234903	0.457429	Down
lnc-MSTRG.14422.1	0.37	0.173333	-1.09398	0.235051	0.457429	Down
lnc-MSTRG.10364.1	0.001	0.44	8.78136	0.23555	0.457429	Up
lnc-MSTRG.1674.1	0.001	0.46	8.84549	0.23555	0.457429	Up
lnc-MSTRG.19786.1	0.001	0.703333	9.45806	0.23555	0.457429	Up
lnc-MSTRG.20264.1	0.001	0.433333	8.75933	0.23555	0.457429	Up
lnc-MSTRG.23462.1	0.001	0.396667	8.63178	0.23555	0.457429	Up
lnc-MSTRG.28576.1	0.001	0.44	8.78136	0.23555	0.457429	Up
lnc-MSTRG.31573.1	0.001	0.55	9.10329	0.23555	0.457429	Up
lnc-MSTRG.9371.1	0.001	0.47	8.87652	0.23555	0.457429	Up
lnc-MSTRG.4683.1	0.803333	0.001	-9.64985	0.235698	0.457481	Down
lnc-MSTRG.7758.1	0.0533333	0.283333	2.40939	0.235823	0.45749	Up
lnc-MSTRG.11731.1	0.163333	0.7	2.09954	0.235957	0.457514	Up
lnc-MSTRG.29802.2	0.916667	2.31333	1.3355	0.236627	0.458578	Up
lnc-MSTRG.118.4	4.81	2.78	-0.790952	0.23684	0.458756	No
lnc-MSTRG.18637.2	0.326667	1.41333	2.11321	0.237177	0.459173	Up
lnc-MSTRG.16326.1	0.766667	1.29	0.7507	0.237346	0.459265	No
lnc-MSTRG.25367.1	25.6267	17.7133	-0.53281	0.237929	0.460159	No
lnc-MSTRG.13213.3	0.566667	1.07667	0.925999	0.238841	0.461643	No
lnc-MSTRG.2664.2	0.35	0.79	1.1745	0.238941	0.461643	Up
lnc-MSTRG.31823.2	0.643333	0.136667	-2.23491	0.239245	0.461995	Down
lnc-MSTRG.13743.1	1.18	0.55	-1.10128	0.239725	0.462477	Down
lnc-MSTRG.33839.2	0.43	0.936667	1.1232	0.239739	0.462477	Up
lnc-MSTRG.14409.1	0.07	0.00666667	-3.39232	0.240461	0.463633	Down
lnc-MSTRG.27075.1	0.02	0.3	3.90689	0.241301	0.464797	Up
lnc-MSTRG.140.1	0.483333	0.001	-8.91687	0.241311	0.464797	Down
lnc-MSTRG.12123.1	0.666667	0.11	-2.59946	0.241631	0.464847	Down
lnc-MSTRG.19142.1	1.71	2.77	0.69589	0.241887	0.464847	No
lnc-MSTRG.3873.1	1.33	0.58	-1.1973	0.241898	0.464847	Down
lnc-MSTRG.32517.1	0.0433333	0.683333	3.97904	0.241963	0.464847	Up
lnc-MSTRG.6464.1	0.04	0.636667	3.99247	0.241963	0.464847	Up
lnc-MSTRG.26776.1	2.52333	1.08	-1.2243	0.242075	0.464847	Down
lnc-MSTRG.15602.2	6.39667	4.15667	-0.621893	0.242607	0.465632	No
lnc-MSTRG.30100.1	0.233333	0.953333	2.03059	0.243481	0.467073	Up
lnc-MSTRG.10124.1	0.0966667	0.001	-6.59495	0.243828	0.467156	Down
lnc-MSTRG.4682.1	1.36333	3.32333	1.28549	0.243845	0.467156	Up
lnc-MSTRG.28695.1	0.0233333	0.36	3.94753	0.243895	0.467156	Up
lnc-MSTRG.5234.2	1.39667	1.78	0.349889	0.244416	0.467917	No
lnc-MSTRG.28361.1	2.33333	1.26333	-0.885157	0.244866	0.468543	No
lnc-MSTRG.26474.3	0.136667	0.001	-7.09452	0.245017	0.468594	Down
lnc-MSTRG.18414.1	0.07	0.323333	2.2076	0.245655	0.469577	Up
lnc-MSTRG.28566.4	0.203333	0.83	2.02926	0.245866	0.469742	Up
lnc-MSTRG.33771.1	0.0266667	0.33	3.62936	0.246343	0.470416	Up
lnc-MSTRG.10803.1	0.486667	0.236667	-1.04008	0.246732	0.470769	Down
lnc-MSTRG.1844.1	0.366667	0.001	-8.51833	0.246812	0.470769	Down
lnc-MSTRG.21428.2	0.001	0.283333	8.14636	0.246902	0.470769	Up
lnc-MSTRG.2950.1	0.506667	2.09333	2.04669	0.247177	0.471057	Up
lnc-MSTRG.16163.2	2.62	3.16	0.270358	0.247835	0.47185	No
lnc-MSTRG.10922.2	4.04	5.35	0.405184	0.248356	0.47185	No
lnc-MSTRG.24229.1	0.001	0.586667	9.1964	0.248659	0.47185	Up
lnc-MSTRG.8733.1	0.001	0.463333	8.85591	0.248659	0.47185	Up
lnc-MSTRG.6284.1	0.29	0.976667	1.75181	0.248959	0.47185	Up
lnc-MSTRG.19004.1	0.001	0.496667	8.95613	0.249085	0.47185	Up
lnc-MSTRG.27782.1	0.263333	0.816667	1.63286	0.249225	0.47185	Up
lnc-MSTRG.29186.3	1.03667	1.55667	0.586508	0.249267	0.47185	No
lnc-MSTRG.15684.1	0.001	0.566667	9.14636	0.249465	0.47185	Up
lnc-MSTRG.16421.1	0.001	0.536667	9.06788	0.249465	0.47185	Up
lnc-MSTRG.23081.1	0.001	0.506667	8.98489	0.249465	0.47185	Up
lnc-MSTRG.2530.1	0.001	0.52	9.02237	0.249465	0.47185	Up
lnc-MSTRG.25596.1	0.001	0.426667	8.73697	0.249465	0.47185	Up
lnc-MSTRG.31159.9	0.001	0.403333	8.65583	0.249465	0.47185	Up
[truncated: 1,957 more rows]

## Sheet: Table S5
KEGG analysis of genes with antisense effects with differentially expressed lncRNAs
Pathway	antisense_diff (78)	Pvalue
Plant hormone signal transduction	11	0.0112017
Linoleic acid metabolism	2	0.0271007
Ubiquinone and other terpenoid-quinone biosynthesis	3	0.0337723
One carbon pool by folate	2	0.034733
Metabolic pathways	43	0.0506702
Biosynthesis of amino acids	8	0.0524402
Pyruvate metabolism	4	0.059667
Arginine and proline metabolism	3	0.0690631
Anthocyanin biosynthesis	1	0.0713527
Carbon metabolism	8	0.0880053
Flavonoid biosynthesis	3	0.0965568
Carotenoid biosynthesis	2	0.0966143
Cyanoamino acid metabolism	2	0.123297
Limonene and pinene degradation	1	0.129647
Biosynthesis of secondary metabolites	24	0.170869
Circadian rhythm - plant	2	0.17098
Valine, leucine and isoleucine degradation	2	0.190837
Glycolysis / Gluconeogenesis	4	0.192493
Ascorbate and aldarate metabolism	2	0.210989
Glucosinolate biosynthesis	1	0.228486
Citrate cycle (TCA cycle)	2	0.248416
2-Oxocarboxylic acid metabolism	2	0.248416
Histidine metabolism	1	0.270283
Other glycan degradation	1	0.270283
Photosynthesis - antenna proteins	1	0.277028
Valine, leucine and isoleucine biosynthesis	1	0.277028
Zeatin biosynthesis	1	0.290335
Cysteine and methionine metabolism	3	0.294838
Glycine, serine and threonine metabolism	2	0.299743
Amino sugar and nucleotide sugar metabolism	3	0.299892
Glycosylphosphatidylinositol(GPI)-anchor biosynthesis	1	0.3034
Pentose phosphate pathway	2	0.306565
Pantothenate and CoA biosynthesis	1	0.309843
Fructose and mannose metabolism	2	0.313376
Biosynthesis of unsaturated fatty acids	1	0.328821
Glyoxylate and dicarboxylate metabolism	2	0.340469
Glycerolipid metabolism	2	0.353901
Carbon fixation in photosynthetic organisms	2	0.390332
Lysine degradation	1	0.394103
Diterpenoid biosynthesis	1	0.410792
Cutin, suberine and wax biosynthesis	1	0.416254
Pentose and glucuronate interconversions	2	0.454131
Glutathione metabolism	2	0.454131
Arginine biosynthesis	1	0.458184
Autophagy - other eukaryotes	1	0.468193
Glycerophospholipid metabolism	2	0.478604
Plant-pathogen interaction	4	0.486304
RNA degradation	2	0.496524
beta-Alanine metabolism	1	0.506436
alpha-Linolenic acid metabolism	1	0.520066
DNA replication	1	0.520066
SNARE interactions in vesicular transport	1	0.520066
Pyrimidine metabolism	1	0.528945
Basal transcription factors	1	0.541962
Endocytosis	3	0.550194
Galactose metabolism	1	0.558766
Fatty acid degradation	1	0.574961
Photosynthesis	1	0.578917
Tryptophan metabolism	1	0.594382
Inositol phosphate metabolism	1	0.637489
Phosphatidylinositol signaling system	1	0.647539
Oxidative phosphorylation	2	0.662291
MAPK signaling pathway - plant	2	0.729394
Fatty acid metabolism	1	0.734071
Peroxisome	1	0.775536
Purine metabolism	1	0.830921
mRNA surveillance pathway	1	0.877515
Starch and sucrose metabolism	1	0.892782
Phenylpropanoid biosynthesis	1	0.928185
Spliceosome	1	0.94561
RNA transport	1	0.94613
Ribosome	2	0.950295

## Sheet: Table S6
KEGG analysis of genes with cis effects with differentially expressed lncRNAs
Pathway	cis_diff (554)	Pvalue
Photosynthesis	13	0.00719076
Cyanoamino acid metabolism	10	0.0100641
Glycine, serine and threonine metabolism	15	0.0105013
Other glycan degradation	6	0.0213169
Inositol phosphate metabolism	13	0.0251102
Pyrimidine metabolism	10	0.0375935
Glyoxylate and dicarboxylate metabolism	14	0.0467087
Phagosome	17	0.0498678
Amino sugar and nucleotide sugar metabolism	20	0.0528062
Phosphatidylinositol signaling system	12	0.0614589
Endocytosis	27	0.0789315
Ether lipid metabolism	6	0.083984
Folate biosynthesis	6	0.083984
Metabolic pathways	266	0.0979483
Glycerophospholipid metabolism	16	0.104436
Linoleic acid metabolism	4	0.106773
Other types of O-glycan biosynthesis	4	0.117809
Plant hormone signal transduction	43	0.118401
Ubiquinone and other terpenoid-quinone biosynthesis	8	0.128962
Riboflavin metabolism	4	0.141271
One carbon pool by folate	4	0.153643
Histidine metabolism	4	0.179528
Fructose and mannose metabolism	11	0.180172
Nicotinate and nicotinamide metabolism	4	0.192984
Brassinosteroid biosynthesis	4	0.206741
Starch and sucrose metabolism	19	0.213069
Galactose metabolism	8	0.21638
Thiamine metabolism	4	0.264196
Glycerolipid metabolism	11	0.2679
Phenylalanine, tyrosine and tryptophan biosynthesis	8	0.28111
Phenylpropanoid biosynthesis	21	0.287075
Biosynthesis of unsaturated fatty acids	4	0.30902
Homologous recombination	6	0.319125
Cutin, suberine and wax biosynthesis	5	0.329091
Plant-pathogen interaction	28	0.329454
Biotin metabolism	3	0.330802
[truncated: 85 more rows]

## Sheet: Table S7
KEGG analysis of genes with trans effects with differentially expressed lncRNAs
[truncated: 138 more rows]

[truncated: 3 more sheets: Table S8, Table S9, Table S10]
